# Supplementary material for: Gene Expression Profiling Reveals Large Regulatory Switches between Succeeding Stipe Stages in Volvariella volvacea
Source: PLoS One. 2014 May 27;9(5):e97789. doi: 10.1371/journal.pone.0097789 (PMC4035324; doi:10.1371/journal.pone.0097789)
Supplement: Table S3 — Genes expressed in stipe tissue of one or more stages. (XLSX) [file pone.0097789.s005.xlsx]

## Sheet: Table S3
Table S3. Genes expressed in stipe tissue of one or more stages; 8,278 genes in total
#gene identifier	stage(s)	button_stage_norm(TPM)	egg_stage_norm(TPM)	elongation_stage_norm(TPM)	maturation_stage_norm(TPM)	pathway	GO Component	GO Function	GO Process	blast nr
GME9431_g	BU	0.36	0	0	0	-	-	-	-	gi|170101995|ref|XP_001882214.1|/9.8332e-21/predicted protein [Laccaria bicolor S238N-H82]
GME1991_g	BU	0.36	0	0	0	-	-	-	-	gi|170089307|ref|XP_001875876.1|/8.79507e-74/predicted protein [Laccaria bicolor S238N-H82]
GME658_g	BU	0.53	0	0	0	-	-	-	-	-
GME8239_g	BU	0.53	0	0	0	ko00260//Glycine, serine and threonine metabolism	-	-	-	gi|302675266|ref|XP_003027317.1|/0/alcohol oxidase-like protein [Schizophyllum commune H4-8]
GME4159_g	BU	0.36	0	0	0	ko01100//Metabolic pathways;ko00860//Porphyrin and chlorophyll metabolism;ko01110//Biosynthesis of secondary metabolites	-	-	-	gi|336366260|gb|EGN94608.1|/3.13116e-52/hypothetical protein SERLA73DRAFT_126076 [Serpula lacrymans var. lacrymans S7.3]
GME2720_g	BU	0.36	0	0	0	-	-	-	-	-
GME9714_g	BU	0.71	0	0	0	ko01100//Metabolic pathways;ko00330//Arginine and proline metabolism;ko00780//Biotin metabolism;ko00970//Aminoacyl-tRNA biosynthesis	-	-	GO:0006412//translation	gi|170085533|ref|XP_001873990.1|/9.756e-154/predicted protein [Laccaria bicolor S238N-H82]
GME184_g	BU	0.36	0	0	0	ko04142//Lysosome;ko05152//Tuberculosis	-	GO:0008233//peptidase activity	-	gi|170105146|ref|XP_001883786.1|/1.7807e-131/aspartic peptidase A1 [Laccaria bicolor S238N-H82]
GME10965_g	BU	0.36	0	0	0	-	-	-	-	gi|242218566|ref|XP_002475072.1|/2.30585e-41/hypothetical protein POSPLDRAFT_96091 [Postia placenta Mad-698-R]
GME7116_g	BU	0.36	0	0	0	-	-	-	-	gi|170095874|ref|XP_001879157.1|/1.79337e-58/predicted protein [Laccaria bicolor S238N-H82]
GME11581_g	BU	0.36	0	0	0	ko01100//Metabolic pathways;ko00520//Amino sugar and nucleotide sugar metabolism;ko00500//Starch and sucrose metabolism;ko01110//Biosynthesis of secondary metabolites	-	GO:0016787//hydrolase activity	-	gi|390926872|gb|AFM30903.1|/1.01115e-126/chitinase [Pleurotus ostreatus]
GME6638_g	BU	0.53	0	0	0	-	-	-	-	gi|170111844|ref|XP_001887125.1|/8.50136e-13/predicted protein [Laccaria bicolor S238N-H82]
GME7598_g	BU	1.25	0	0	0	ko00930//Caprolactam degradation;ko01120//Microbial metabolism in diverse environments	-	GO:0016491//oxidoreductase activity	-	gi|170093614|ref|XP_001878028.1|/3.5865e-105/predicted protein [Laccaria bicolor S238N-H82]
GME11027_g	BU	0.36	0	0	0	-	-	GO:0051540;GO:0017111//nucleoside-triphosphatase activity;GO:0032559	GO:0009207	gi|403417694|emb|CCM04394.1|/0/predicted protein [Fibroporia radiculosa]
GME490_g	BU	0.89	0	0	0	ko00030//Pentose phosphate pathway	-	GO:0003824//catalytic activity	GO:0008152//metabolic process	gi|296416818|ref|XP_002838069.1|/3.04465e-70/hypothetical protein [Tuber melanosporum Mel28]
GME199_g	BU	0.36	0	0	0	-	-	-	-	gi|395331673|gb|EJF64053.1|/1.07611e-12/hypothetical protein DICSQDRAFT_133756, partial [Dichomitus squalens LYAD-421 SS1]
GME2064_g	BU	0.36	0	0	0	-	-	-	-	gi|336370156|gb|EGN98497.1|/5.58599e-63/hypothetical protein SERLA73DRAFT_183541 [Serpula lacrymans var. lacrymans S7.3]
GME10753_g	BU	0.53	0	0	0	-	-	-	-	-
GME7924_g	BU	0.36	0	0	0	-	-	-	-	gi|393231266|gb|EJD38860.1|/1.43339e-94/DNA/RNA polymerase [Auricularia delicata TFB-10046 SS5]
GME6567_g	BU	0.36	0	0	0	-	-	-	-	gi|392594548|gb|EIW83872.1|/3.75605e-39/hypothetical protein CONPUDRAFT_142400 [Coniophora puteana RWD-64-598 SS2]
GME2870_g	BU	0.53	0	0	0	-	-	-	-	gi|170086682|ref|XP_001874564.1|/1.88381e-20/predicted protein [Laccaria bicolor S238N-H82]
GME916_g	BU	0.53	0	0	0	-	-	-	-	gi|299751571|ref|XP_001830353.2|/2.13165e-32/hypothetical protein CC1G_01989 [Coprinopsis cinerea okayama7#130]
GME2312_g	BU	0.36	0	0	0	-	-	-	-	gi|170108939|ref|XP_001885677.1|/2.28378e-110/predicted protein [Laccaria bicolor S238N-H82]
GME8543_g	BU	0.36	0	0	0	ko00520//Amino sugar and nucleotide sugar metabolism;ko01110//Biosynthesis of secondary metabolites	-	GO:0003824//catalytic activity	-	gi|169861071|ref|XP_001837170.1|/6.67377e-138/chitin deacetylase [Coprinopsis cinerea okayama7#130]
GME8654_g	BU	0.53	0	0	0	ko01100//Metabolic pathways;ko01110//Biosynthesis of secondary metabolites;ko00130//Ubiquinone and other terpenoid-quinone biosynthesis	GO:0031224//intrinsic to membrane	GO:0016765//transferase activity, transferring alkyl or aryl (other than methyl) groups	GO:0008152//metabolic process	gi|390601189|gb|EIN10583.1|/5.25136e-120/4-hydroxybenzoate polyprenyl transferase [Punctularia strigosozonata HHB-11173 SS5]
GME8771_g	BU	0.53	0	0	0	-	-	-	-	gi|299748007|ref|XP_001837397.2|/5.34404e-59/hypothetical protein CC1G_01309 [Coprinopsis cinerea okayama7#130]
GME7040_g	BU	0.36	0	0	0	-	-	-	-	gi|170087070|ref|XP_001874758.1|/3.06095e-25/predicted protein [Laccaria bicolor S238N-H82]
GME4437_g	BU	0.36	0	0	0	-	-	-	-	gi|299739478|ref|XP_001835316.2|/1.93457e-173/transcriptional factor B3 [Coprinopsis cinerea okayama7#130]
GME10970_g	BU	0.36	0	0	0	-	-	-	-	gi|238582519|ref|XP_002389957.1|/1.28897e-34/hypothetical protein MPER_10847 [Moniliophthora perniciosa FA553]
GME6524_g	BU	0.53	0	0	0	-	-	-	-	gi|302679146|ref|XP_003029255.1|/6.34045e-31/hypothetical protein SCHCODRAFT_111227 [Schizophyllum commune H4-8]
GME5274_g	BU	0.36	0	0	0	-	-	-	-	-
GME6234_g	BU	0.36	0	0	0	-	-	-	-	gi|169862185|ref|XP_001837723.1|/3.86645e-07/hypothetical protein CC1G_06929 [Coprinopsis cinerea okayama7#130]
GME2743_g	BU	1.43	0	0	0	ko01100//Metabolic pathways;ko00071//Fatty acid metabolism;ko01110//Biosynthesis of secondary metabolites;ko00626//Naphthalene degradation;ko00010//Glycolysis / Gluconeogenesis;ko00625//Chloroalkane and chloroalkene degradation;ko00350//Tyrosine metabolism;ko01120//Microbial metabolism in diverse environments	-	-	-	gi|170104216|ref|XP_001883322.1|/9.86213e-98/predicted protein [Laccaria bicolor S238N-H82]
GME2568_g	BU	0.71	0	0	0	-	-	-	-	gi|395330212|gb|EJF62596.1|/6.87626e-82/terpenoid synthase [Dichomitus squalens LYAD-421 SS1]
GME9708_g	BU	0.53	0	0	0	ko05131//Shigellosis;ko05100//Bacterial invasion of epithelial cells;ko04914//Progesterone-mediated oocyte maturation;ko04110//Cell cycle;ko04114//Oocyte meiosis	-	-	GO:0000087//M phase of mitotic cell cycle	gi|238586623|ref|XP_002391230.1|/1.23681e-83/hypothetical protein MPER_09374 [Moniliophthora perniciosa FA553]
GME7864_g	BU	0.36	0	0	0	-	-	GO:0016787//hydrolase activity	-	gi|302692576|ref|XP_003035967.1|/4.50652e-82/hypothetical protein SCHCODRAFT_50648 [Schizophyllum commune H4-8]
GME7166_g	BU	0.53	0	0	0	ko00930//Caprolactam degradation;ko01120//Microbial metabolism in diverse environments;ko01100//Metabolic pathways;ko00052//Galactose metabolism;ko00670//One carbon pool by folate;ko00630//Glyoxylate and dicarboxylate metabolism;ko00520//Amino sugar and nucleotide sugar metabolism;ko00500//Starch and sucrose metabolism;ko00040//Pentose and glucuronate interconversions;ko01110//Biosynthesis of sec…	-	-	-	gi|403413246|emb|CCL99946.1|/0/predicted protein [Fibroporia radiculosa]
GME8357_g	BU	0.71	0	0	0	-	GO:0043231//intracellular membrane-bounded organelle	-	GO:0006259//DNA metabolic process	gi|170090704|ref|XP_001876574.1|/5.71831e-62/predicted protein [Laccaria bicolor S238N-H82]
GME1464_g	BU	5.17	0	0	0	ko00910//Nitrogen metabolism	-	-	-	gi|170112352|ref|XP_001887378.1|/6.51107e-81/predicted protein [Laccaria bicolor S238N-H82]
GME8358_g	BU	0.36	0	0	0	-	-	-	-	gi|170091626|ref|XP_001877035.1|/0/predicted protein [Laccaria bicolor S238N-H82]
GME1532_g	BU	0.53	0	0	0	ko03040//Spliceosome	GO:0005622//intracellular	-	GO:0006396//RNA processing	gi|169851796|ref|XP_001832587.1|/0/pre-mRNA-splicing factor CLF1 [Coprinopsis cinerea okayama7#130]
GME7063_g	BU	0.36	0	0	0	-	-	-	-	gi|170093728|ref|XP_001878085.1|/1.79208e-37/predicted protein [Laccaria bicolor S238N-H82]
GME6514_g	BU	0.36	0	0	0	-	-	-	-	-
GME9463_g	BU	0.36	0	0	0	-	-	-	-	gi|302694647|ref|XP_003037002.1|/1.6263e-59/hypothetical protein SCHCODRAFT_49265 [Schizophyllum commune H4-8]
GME6574_g	BU	0.71	0	0	0	-	-	-	-	gi|170101995|ref|XP_001882214.1|/6.75106e-15/predicted protein [Laccaria bicolor S238N-H82]
GME8493_g	BU	0.36	0	0	0	-	-	-	-	-
GME6761_g	BU	0.36	0	0	0	-	-	-	-	gi|170100865|ref|XP_001881650.1|/1.93677e-148/predicted protein [Laccaria bicolor S238N-H82]
GME10960_g	BU	0.71	0	0	0	-	-	-	-	gi|170120793|ref|XP_001891322.1|/3.83336e-80/predicted protein [Laccaria bicolor S238N-H82]
GME7335_g	BU	0.36	0	0	0	-	-	-	-	gi|170112350|ref|XP_001887377.1|/2.22109e-57/predicted protein [Laccaria bicolor S238N-H82]
GME7570_g	BU	0.36	0	0	0	ko01100//Metabolic pathways;ko00540//Lipopolysaccharide biosynthesis;ko01110//Biosynthesis of secondary metabolites;ko00460//Cyanoamino acid metabolism;ko03010//Ribosome;ko00940//Phenylpropanoid biosynthesis;ko00500//Starch and sucrose metabolism;ko00511//Other glycan degradation;ko00970//Aminoacyl-tRNA biosynthesis	-	GO:0016798//hydrolase activity, acting on glycosyl bonds	GO:0008152//metabolic process	gi|170094666|ref|XP_001878554.1|/1.59757e-160/glycoside hydrolase family 3 protein [Laccaria bicolor S238N-H82]
GME10379_g	BU	0.36	0	0	0	ko02020//Two-component system;ko01100//Metabolic pathways;ko00591//Linoleic acid metabolism;ko00051//Fructose and mannose metabolism;ko00362//Benzoate degradation;ko00363//Bisphenol degradation;ko01110//Biosynthesis of secondary metabolites;ko00903//Limonene and pinene degradation;ko00650//Butanoate metabolism;ko00626//Naphthalene degradation;ko00625//Chloroalkane and chloroalkene degradation;ko0…	-	-	-	gi|242218907|ref|XP_002475239.1|/9.17659e-113/candidate aryl-alcohol dehydrogenase [Postia placenta Mad-698-R]
GME2419_g	BU	0.36	0	0	0	-	-	-	-	gi|393221872|gb|EJD07356.1|/4.93747e-35/cysteine proteinase [Fomitiporia mediterranea MF3/22]
GME3632_g	BU	0.36	0	0	0	-	-	-	-	gi|395327305|gb|EJF59706.1|/1.12605e-80/S-adenosyl-L-methionine dependent methyltransferase [Dichomitus squalens LYAD-421 SS1]
GME2637_g	BU	0.53	0	0	0	-	-	-	-	-
GME4275_g	BU	0.36	0	0	0	ko04910//Insulin signaling pathway;ko04150//mTOR signaling pathway;ko03013//RNA transport	GO:0044424//intracellular part	GO:0008135//translation factor activity, nucleic acid binding	GO:0006412//translation	gi|169849471|ref|XP_001831439.1|/1.15333e-99/eukaryotic translation initiation factor 4E member 2 [Coprinopsis cinerea okayama7#130]
GME8858_g	BU	0.53	0	0	0	-	-	-	-	gi|389743285|gb|EIM84470.1|/1.4657e-22/hypothetical protein STEHIDRAFT_148503 [Stereum hirsutum FP-91666 SS1]
GME141_g	BU	0.36	0	0	0	-	-	-	-	-
GME2660_g	BU	0.36	0	0	0	-	-	-	-	gi|393219872|gb|EJD05358.1|/1.01674e-24/hypothetical protein FOMMEDRAFT_26299 [Fomitiporia mediterranea MF3/22]
GME7682_g	BU	1.43	0	0	0	-	-	-	-	-
GME7327_g	BU	0.53	0	0	0	-	-	-	-	gi|242816918|ref|XP_002486846.1|/8.46457e-108/conserved hypothetical protein [Talaromyces stipitatus ATCC 10500]
GME2723_g	BU	0.53	0	0	0	-	-	-	-	gi|171684291|ref|XP_001907087.1|/1.72371e-15/hypothetical protein [Podospora anserina S mat+]
GME10297_g	BU	0.36	0	0	0	ko01100//Metabolic pathways;ko00520//Amino sugar and nucleotide sugar metabolism;ko00500//Starch and sucrose metabolism;ko01110//Biosynthesis of secondary metabolites	-	GO:0003824//catalytic activity	-	gi|353238767|emb|CCA70703.1|/4.69334e-93/related to endoglucanase IV [Piriformospora indica DSM 11827]
GME2747_g	BU	0.53	0	0	0	-	-	-	-	gi|238582519|ref|XP_002389957.1|/5.55425e-37/hypothetical protein MPER_10847 [Moniliophthora perniciosa FA553]
GME7341_g	BU	0.71	0	0	0	-	-	-	-	gi|170112350|ref|XP_001887377.1|/3.49227e-66/predicted protein [Laccaria bicolor S238N-H82]
GME7279_g	BU	0.36	0	0	0	ko02020//Two-component system;ko01100//Metabolic pathways;ko00591//Linoleic acid metabolism;ko00051//Fructose and mannose metabolism;ko00362//Benzoate degradation;ko00363//Bisphenol degradation;ko01110//Biosynthesis of secondary metabolites;ko00903//Limonene and pinene degradation;ko00650//Butanoate metabolism;ko00626//Naphthalene degradation;ko00625//Chloroalkane and chloroalkene degradation;ko0…	-	-	-	gi|336375497|gb|EGO03833.1|/6.24189e-113/hypothetical protein SERLA73DRAFT_175487 [Serpula lacrymans var. lacrymans S7.3]
GME5938_g	BU	0.36	0	0	0	-	-	GO:0003824//catalytic activity	-	gi|347827265|emb|CCD42962.1|/4.24326e-87/glycosyltransferase family 1 protein [Botryotinia fuckeliana]
GME4235_g	BU	0.36	0	0	0	-	-	-	-	gi|169846842|ref|XP_001830135.1|/4.74882e-26/hypothetical protein CC1G_04568 [Coprinopsis cinerea okayama7#130]
GME9812_g	BU	0.36	0	0	0	-	-	-	-	gi|169869416|ref|XP_001841274.1|/1.26622e-138/nmrA-family protein [Coprinopsis cinerea okayama7#130]
GME10829_g	BU	0.53	0	0	0	-	-	-	-	gi|403412666|emb|CCL99366.1|/1.08354e-12/predicted protein [Fibroporia radiculosa]
GME5146_g	BU	0.36	0	0	0	-	-	-	-	gi|299751017|ref|XP_001829989.2|/6.37897e-11/hypothetical protein CC1G_04678 [Coprinopsis cinerea okayama7#130]
GME7711_g	BU	0.36	0	0	0	ko03040//Spliceosome	-	GO:0005488//binding	-	gi|403417817|emb|CCM04517.1|/9.04219e-123/predicted protein [Fibroporia radiculosa]
GME4015_g	BU	0.53	0	0	0	ko01100//Metabolic pathways;ko00730//Thiamine metabolism	-	GO:0016301//kinase activity	GO:0006772//thiamine metabolic process	gi|392596314|gb|EIW85637.1|/6.55685e-36/hypothetical protein CONPUDRAFT_118575 [Coniophora puteana RWD-64-598 SS2]
GME7628_g	BU	0.53	0	0	0	ko04120//Ubiquitin mediated proteolysis;ko05169//Epstein-Barr virus infection;ko04144//Endocytosis	-	-	-	gi|392567877|gb|EIW61052.1|/7.66531e-47/hypothetical protein TRAVEDRAFT_118998 [Trametes versicolor FP-101664 SS1]
GME7813_g	BU	0.36	0	0	0	ko00980//Metabolism of xenobiotics by cytochrome P450	-	-	-	gi|393215311|gb|EJD00802.1|/1.80795e-144/Aldo/keto reductase [Fomitiporia mediterranea MF3/22]
GME8932_g	BU	0.89	0	0	0	-	-	-	-	gi|170086426|ref|XP_001874436.1|/2.01311e-15/predicted protein [Laccaria bicolor S238N-H82]
GME7227_g	BU	0.36	0	0	0	-	-	-	-	gi|389743015|gb|EIM84200.1|/6.85406e-09/hypothetical protein STEHIDRAFT_132626 [Stereum hirsutum FP-91666 SS1]
GME1315_g	BU	0.71	0	0	0	-	-	-	-	-
GME9316_g	BU	0.36	0	0	0	-	-	-	-	gi|170114436|ref|XP_001888415.1|/6.73426e-09/predicted protein [Laccaria bicolor S238N-H82]
GME1429_g	BU	0.36	0	0	0	-	-	-	-	gi|154273979|ref|XP_001537841.1|/7.41707e-07/predicted protein [Ajellomyces capsulatus NAm1]
GME12048_g	BU	0.89	0	0	0	-	-	-	-	gi|170094408|ref|XP_001878425.1|/3.01959e-26/predicted protein [Laccaria bicolor S238N-H82]
GME1061_g	BU	0.36	0	0	0	-	-	-	-	gi|336388990|gb|EGO30133.1|/2.99536e-55/hypothetical protein SERLADRAFT_454421 [Serpula lacrymans var. lacrymans S7.9]
GME1560_g	BU	0.71	0	0	0	-	-	-	-	gi|336382035|gb|EGO23186.1|/1.52513e-15/hypothetical protein SERLADRAFT_357012 [Serpula lacrymans var. lacrymans S7.9]
GME7059_g	BU	0.89	0	0	0	ko00624//Polycyclic aromatic hydrocarbon degradation;ko01100//Metabolic pathways;ko00627//Aminobenzoate degradation;ko00363//Bisphenol degradation;ko01110//Biosynthesis of secondary metabolites;ko00903//Limonene and pinene degradation;ko00945//Stilbenoid, diarylheptanoid and gingerol biosynthesis;ko01120//Microbial metabolism in diverse environments	-	-	-	gi|354961810|dbj|BAL05170.1|/1.9581e-117/cytochrome P450 [Phanerochaete chrysosporium]
GME481_g	BU	0.36	0	0	0	-	-	-	-	gi|299748370|ref|XP_001839084.2|/2.66075e-06/hypothetical protein CC1G_10649 [Coprinopsis cinerea okayama7#130]
GME10108_g	BU	0.71	0	0	0	-	-	-	-	gi|299752065|ref|XP_001830678.2|/0/ribosome biogenesis protein tsr1 [Coprinopsis cinerea okayama7#130]
GME6565_g	BU	0.36	0	0	0	-	-	-	-	gi|299741308|ref|XP_001834375.2|/4.76716e-16/hypothetical protein CC1G_02111 [Coprinopsis cinerea okayama7#130]
GME4111_g	BU	0.53	0	0	0	-	-	-	-	gi|169860192|ref|XP_001836732.1|/8.06202e-79/hypothetical protein CC1G_08117 [Coprinopsis cinerea okayama7#130]
GME2329_g	BU	0.36	0	0	0	-	-	-	-	gi|170108941|ref|XP_001885678.1|/4.1546e-52/predicted protein [Laccaria bicolor S238N-H82]
GME10388_g	BU	0.53	0	0	0	-	-	-	-	-
GME580_g	BU	0.89	0	0	0	ko00920//Sulfur metabolism;ko01100//Metabolic pathways;ko00270//Cysteine and methionine metabolism;ko01120//Microbial metabolism in diverse environments;ko00260//Glycine, serine and threonine metabolism;ko01100//Metabolic pathways;ko00920//Sulfur metabolism;ko00051//Fructose and mannose metabolism;ko00030//Pentose phosphate pathway;ko01110//Biosynthesis of secondary metabolites;ko00620//Pyruvate …	-	-	-	gi|380496077|emb|CCF31904.1|/1.01114e-126/cysteine synthase K/M:Cysteine synthase B [Colletotrichum higginsianum]
GME5928_g	BU	1.6	0	0	0	ko01100//Metabolic pathways;ko00230//Purine metabolism;ko00983//Drug metabolism - other enzymes;ko00240//Pyrimidine metabolism	-	GO:0003824//catalytic activity	-	gi|170091458|ref|XP_001876951.1|/1.24562e-76/predicted protein [Laccaria bicolor S238N-H82]
GME2388_g	BU	0.36	0	0	0	-	-	-	-	gi|336386822|gb|EGO27968.1|/4.24215e-57/hypothetical protein SERLADRAFT_462294 [Serpula lacrymans var. lacrymans S7.9]
GME6258_g	BU	0.36	0	0	0	-	-	-	-	gi|299755170|ref|XP_001828478.2|/9.50055e-26/NWD2 [Coprinopsis cinerea okayama7#130]
GME3435_g	BU	0.36	0	0	0	-	-	-	-	gi|392590076|gb|EIW79406.1|/7.55587e-14/hypothetical protein CONPUDRAFT_145444 [Coniophora puteana RWD-64-598 SS2]
GME9325_g	BU	0.36	0	0	0	ko02020//Two-component system;ko01100//Metabolic pathways;ko00591//Linoleic acid metabolism;ko00051//Fructose and mannose metabolism;ko00362//Benzoate degradation;ko00363//Bisphenol degradation;ko01110//Biosynthesis of secondary metabolites;ko00903//Limonene and pinene degradation;ko00650//Butanoate metabolism;ko00626//Naphthalene degradation;ko00625//Chloroalkane and chloroalkene degradation;ko0…	GO:0031224//intrinsic to membrane	GO:0015075//ion transmembrane transporter activity;GO:0003824//catalytic activity	GO:0030001//metal ion transport;GO:0008152//metabolic process	gi|169845605|ref|XP_001829522.1|/3.91795e-156/voltage-gated potassium channel beta-2 subunit [Coprinopsis cinerea okayama7#130]
GME6481_g	BU	0.36	0	0	0	ko00624//Polycyclic aromatic hydrocarbon degradation;ko01100//Metabolic pathways;ko00627//Aminobenzoate degradation;ko00363//Bisphenol degradation;ko01110//Biosynthesis of secondary metabolites;ko00903//Limonene and pinene degradation;ko00945//Stilbenoid, diarylheptanoid and gingerol biosynthesis;ko01120//Microbial metabolism in diverse environments;ko01100//Metabolic pathways;ko00360//Phenylalan…	-	GO:0046872//metal ion binding	-	gi|170103023|ref|XP_001882727.1|/9.64938e-135/predicted protein [Laccaria bicolor S238N-H82]
GME4146_g	BU	0.53	0	0	0	-	-	-	-	-
GME9216_g	BU	0.36	0	0	0	ko04727//GABAergic synapse	-	-	GO:0006732//coenzyme metabolic process;GO:0051188//cofactor biosynthetic process;GO:0042559//pteridine-containing compound biosynthetic process	gi|336386604|gb|EGO27750.1|/0/hypothetical protein SERLADRAFT_360359 [Serpula lacrymans var. lacrymans S7.9]
GME3009_g	BU	0.36	0	0	0	ko01100//Metabolic pathways;ko00310//Lysine degradation;ko00780//Biotin metabolism	-	-	-	gi|336374698|gb|EGO03035.1|/9.88731e-42/hypothetical protein SERLA73DRAFT_158691 [Serpula lacrymans var. lacrymans S7.3]
GME10074_g	BU	0.36	0	0	0	-	-	-	-	gi|302680464|ref|XP_003029914.1|/4.15293e-36/hypothetical protein SCHCODRAFT_111720 [Schizophyllum commune H4-8]
GME2452_g	BU	0.53	0	0	0	ko01100//Metabolic pathways;ko00624//Polycyclic aromatic hydrocarbon degradation;ko00626//Naphthalene degradation;ko00621//Dioxin degradation;ko01120//Microbial metabolism in diverse environments	-	-	-	gi|170114430|ref|XP_001888412.1|/9.83518e-79/predicted protein [Laccaria bicolor S238N-H82]
GME12043_g	BU	0.71	0	0	0	ko04144//Endocytosis	-	GO:0032559;GO:0016462//pyrophosphatase activity	-	gi|170114933|ref|XP_001888662.1|/3.24553e-35/predicted protein [Laccaria bicolor S238N-H82]
GME10785_g	BU	0.71	0	0	0	-	-	-	-	gi|395326394|gb|EJF58804.1|/0/hypothetical protein DICSQDRAFT_172627 [Dichomitus squalens LYAD-421 SS1]
GME11959_g	BU	0.53	0	0	0	-	-	-	-	-
GME780_g	BU	0.71	0	0	0	-	-	-	-	gi|403418810|emb|CCM05510.1|/3.98113e-95/predicted protein [Fibroporia radiculosa]
GME3048_g	BU	0.36	0	0	0	ko00982//Drug metabolism - cytochrome P450;ko01120//Microbial metabolism in diverse environments;ko00680//Methane metabolism	-	-	-	gi|389744100|gb|EIM85283.1|/2.21064e-160/FAD/NAD-P-binding domain-containing protein [Stereum hirsutum FP-91666 SS1]
GME7447_g	BU	0.36	0	0	0	-	-	-	-	gi|302698721|ref|XP_003039039.1|/2.83613e-12/expressed protein [Schizophyllum commune H4-8]
GME7537_g	BU	0.53	0	0	0	-	-	-	-	-
GME425_g	BU	0.36	0	0	0	ko01100//Metabolic pathways;ko01110//Biosynthesis of secondary metabolites;ko00130//Ubiquinone and other terpenoid-quinone biosynthesis	-	-	-	gi|336389696|gb|EGO30839.1|/8.47271e-105/hypothetical protein SERLADRAFT_432479 [Serpula lacrymans var. lacrymans S7.9]
GME1171_g	BU	0.36	0	0	0	-	-	-	-	gi|336368413|gb|EGN96756.1|/6.84555e-15/hypothetical protein SERLA73DRAFT_161770 [Serpula lacrymans var. lacrymans S7.3]
GME7630_g	BU	1.25	0	0	0	-	-	-	-	gi|299738900|ref|XP_001834878.2|/2.0227e-11/hypothetical protein CC1G_09805 [Coprinopsis cinerea okayama7#130]
GME8270_g	BU	0.36	0	0	0	-	-	GO:0004672//protein kinase activity;GO:0000166//nucleotide binding	-	gi|390595964|gb|EIN05367.1|/1.37411e-12/kinase-like protein [Punctularia strigosozonata HHB-11173 SS5]
GME1292_g	BU	1.6	0	0	0	-	-	-	-	gi|336370977|gb|EGN99317.1|/1.12706e-158/hypothetical protein SERLA73DRAFT_123102 [Serpula lacrymans var. lacrymans S7.3]
GME4307_g	BU	0.36	0	0	0	ko01100//Metabolic pathways;ko00630//Glyoxylate and dicarboxylate metabolism;ko01110//Biosynthesis of secondary metabolites;ko00250//Alanine, aspartate and glutamate metabolism;ko04146//Peroxisome;ko00260//Glycine, serine and threonine metabolism;ko00680//Methane metabolism;ko01120//Microbial metabolism in diverse environments	-	GO:0048037//cofactor binding	-	gi|302687060|ref|XP_003033210.1|/2.98549e-153/hypothetical protein SCHCODRAFT_10951 [Schizophyllum commune H4-8]
GME2398_g	BU	0.36	0	0	0	ko03008//Ribosome biogenesis in eukaryotes	-	-	-	gi|170113228|ref|XP_001887814.1|/2.98264e-94/predicted protein [Laccaria bicolor S238N-H82]
GME11349_g	BU	1.07	0	0	0	-	-	-	-	gi|170083947|ref|XP_001873197.1|/4.12307e-135/predicted protein [Laccaria bicolor S238N-H82]
GME8912_g	BU	0.53	0	0	0	ko00624//Polycyclic aromatic hydrocarbon degradation;ko01100//Metabolic pathways;ko00627//Aminobenzoate degradation;ko00363//Bisphenol degradation;ko01110//Biosynthesis of secondary metabolites;ko00903//Limonene and pinene degradation;ko00945//Stilbenoid, diarylheptanoid and gingerol biosynthesis;ko01120//Microbial metabolism in diverse environments;ko01100//Metabolic pathways;ko00360//Phenylalan…	-	GO:0016491//oxidoreductase activity;GO:0005506//iron ion binding	GO:0008152//metabolic process	gi|403420020|emb|CCM06720.1|/5.06197e-90/predicted protein [Fibroporia radiculosa]
GME8269_g	BU	0.36	0	0	0	ko00230//Purine metabolism;ko04113//Meiosis - yeast	-	-	GO:0009987//cellular process	gi|299752379|ref|XP_001830889.2|/4.48871e-157/adenylate cyclase [Coprinopsis cinerea okayama7#130]
GME412_g	BU	0.36	0	0	0	-	-	-	-	-
GME9145_g	BU	0.36	0	0	0	-	-	-	-	gi|170113984|ref|XP_001888190.1|/5.66329e-11/predicted protein [Laccaria bicolor S238N-H82]
GME6392_g	BU	0.53	0	0	0	-	-	-	-	gi|336382637|gb|EGO23787.1|/1.82557e-13/hypothetical protein SERLADRAFT_392238 [Serpula lacrymans var. lacrymans S7.9]
GME486_g	BU	0.36	0	0	0	ko00624//Polycyclic aromatic hydrocarbon degradation;ko00361//Chlorocyclohexane and chlorobenzene degradation;ko01120//Microbial metabolism in diverse environments;ko00640//Propanoate metabolism	-	-	-	gi|398407965|ref|XP_003855448.1|/6.02212e-09/hypothetical protein MYCGRDRAFT_108162 [Zymoseptoria tritici IPO323]
GME2737_g	BU	0.36	0	0	0	-	-	-	-	gi|336381317|gb|EGO22469.1|/6.18211e-08/hypothetical protein SERLADRAFT_409958 [Serpula lacrymans var. lacrymans S7.9]
GME4848_g	BU	0.53	0	0	0	-	-	-	-	gi|170115466|ref|XP_001888927.1|/5.12169e-06/predicted protein [Laccaria bicolor S238N-H82]
GME4260_g	BU	0.36	0	0	0	-	-	GO:0016670//oxidoreductase activity, acting on a sulfur group of donors, oxygen as acceptor	GO:0008152//metabolic process	gi|403417473|emb|CCM04173.1|/6.8813e-67/predicted protein [Fibroporia radiculosa]
GME5776_g	BU	0.53	0	0	0	-	-	-	-	gi|392570498|gb|EIW63671.1|/4.58471e-76/hypothetical protein TRAVEDRAFT_43949 [Trametes versicolor FP-101664 SS1]
GME7593_g	BU	0.71	0	0	0	-	-	-	-	-
GME5341_g	BU	0.36	0	0	0	-	-	-	-	gi|169852912|ref|XP_001833138.1|/4.81019e-95/serine/threonine protein phosphatase PP2A-associated protein [Coprinopsis cinerea okayama7#130]
GME1992_g	BU	0.36	0	0	0	-	-	-	-	gi|170090141|ref|XP_001876293.1|/5.00432e-25/predicted protein [Laccaria bicolor S238N-H82]
GME6964_g	BU	0.36	0	0	0	ko04141//Protein processing in endoplasmic reticulum;ko01100//Metabolic pathways;ko00513//Various types of N-glycan biosynthesis;ko00510//N-Glycan biosynthesis	-	GO:0016787//hydrolase activity	-	gi|170114997|ref|XP_001888694.1|/7.92148e-167/glycoside hydrolase family 47 protein [Laccaria bicolor S238N-H82]
GME2402_g	BU	0.53	0	0	0	-	-	-	-	gi|238577195|ref|XP_002388308.1|/2.19308e-12/hypothetical protein MPER_12689 [Moniliophthora perniciosa FA553]
GME4774_g	BU	1.6	0	0	0	-	-	-	-	gi|322702353|gb|EFY94016.1|/2.15736e-131/FluG domain-containing protein [Metarhizium anisopliae ARSEF 23]
GME10492_g	BU	0.36	0	0	0	ko00620//Pyruvate metabolism;ko00300//Lysine biosynthesis;ko01100//Metabolic pathways;ko00290//Valine, leucine and isoleucine biosynthesis;ko01110//Biosynthesis of secondary metabolites	-	GO:0016746//transferase activity, transferring acyl groups	GO:0043436	gi|169859426|ref|XP_001836353.1|/0/homocitrate synthase [Coprinopsis cinerea okayama7#130]
GME5717_g	BU	0.71	0	0	0	-	-	-	-	gi|296413844|ref|XP_002836618.1|/5.81247e-119/hypothetical protein [Tuber melanosporum Mel28]
GME2629_g	BU	1.6	0	0	0	-	-	-	-	gi|389742770|gb|EIM83956.1|/1.70756e-74/hypothetical protein STEHIDRAFT_123510 [Stereum hirsutum FP-91666 SS1]
GME1947_g	BU	0.53	0	0	0	-	-	-	-	gi|170097417|ref|XP_001879928.1|/1.98652e-49/predicted protein [Laccaria bicolor S238N-H82]
GME5918_g	BU	0.53	0	0	0	-	-	-	-	gi|170091822|ref|XP_001877133.1|/3.14308e-102/aspartic peptidase A1 [Laccaria bicolor S238N-H82]
GME1696_g	BU	0.53	0	0	0	-	-	-	-	-
GME9103_g	BU	0.36	0	0	0	ko00230//Purine metabolism;ko04113//Meiosis - yeast	-	-	-	gi|170092737|ref|XP_001877590.1|/0/adenylate cyclase [Laccaria bicolor S238N-H82]
GME2914_g	BU	1.43	0	0	0	ko00750//Vitamin B6 metabolism;ko01100//Metabolic pathways;ko00350//Tyrosine metabolism;ko01120//Microbial metabolism in diverse environments;ko00680//Methane metabolism;ko00260//Glycine, serine and threonine metabolism;ko00624//Polycyclic aromatic hydrocarbon degradation;ko00361//Chlorocyclohexane and chlorobenzene degradation;ko01120//Microbial metabolism in diverse environments;ko00640//Propan…	-	-	-	gi|389747731|gb|EIM88909.1|/3.4009e-73/NAD-P-binding protein [Stereum hirsutum FP-91666 SS1]
GME4107_g	BU	1.07	0	0	0	-	-	-	-	gi|375333787|gb|AFA53122.1|/9.50096e-114/lectin 2 [Agrocybe aegerita]
GME6071_g	BU	1.43	0	0	0	-	-	-	-	gi|392560105|gb|EIW53288.1|/7.21711e-130/chondroitin AC/alginate lyase [Trametes versicolor FP-101664 SS1]
GME7370_g	BU	0.36	0	0	0	-	-	GO:0004553//hydrolase activity, hydrolyzing O-glycosyl compounds	GO:0008152//metabolic process	gi|32402371|gb|AAP81158.1|/1.72969e-104/xylanase [Volvariella volvacea]
GME4080_g	BU	0.53	0	0	0	ko01100//Metabolic pathways;ko00310//Lysine degradation;ko00780//Biotin metabolism	-	-	-	gi|299747566|ref|XP_001837124.2|/6.27343e-77/ThiJ/PfpI [Coprinopsis cinerea okayama7#130]
GME2282_g	BU	0.53	0	0	0	-	-	-	-	gi|170097421|ref|XP_001879930.1|/5.34983e-44/predicted protein [Laccaria bicolor S238N-H82]
GME10787_g	BU	0.36	0	0	0	-	-	-	-	-
GME2172_g	BU	0.36	0	0	0	-	-	GO:0005488//binding	-	gi|238590683|ref|XP_002392394.1|/1.33197e-12/hypothetical protein MPER_08036 [Moniliophthora perniciosa FA553]
GME9203_g	BU	0.36	0	0	0	-	-	-	-	gi|302673957|ref|XP_003026664.1|/6.21776e-62/hypothetical protein SCHCODRAFT_61887 [Schizophyllum commune H4-8]
GME2695_g	BU	0.36	0	0	0	-	-	-	-	gi|395323640|gb|EJF56103.1|/3.44078e-08/hypothetical protein DICSQDRAFT_164003 [Dichomitus squalens LYAD-421 SS1]
GME4076_g	BU	0.36	0	0	0	-	-	-	-	gi|392590027|gb|EIW79357.1|/3.05242e-13/hypothetical protein CONPUDRAFT_138491 [Coniophora puteana RWD-64-598 SS2]
GME10590_g	BU	0.36	0	0	0	-	-	-	-	gi|389740294|gb|EIM81485.1|/1.73222e-12/hypothetical protein STEHIDRAFT_161671 [Stereum hirsutum FP-91666 SS1]
GME6114_g	BU	0.36	0	0	0	-	-	-	-	-
GME7002_g	BU	0.71	0	0	0	ko03410//Base excision repair;ko00970//Aminoacyl-tRNA biosynthesis;ko00450//Selenocompound metabolism	-	-	-	gi|336386917|gb|EGO28063.1|/2.52216e-68/hypothetical protein SERLADRAFT_462513 [Serpula lacrymans var. lacrymans S7.9]
GME10775_g	BU	1.07	0	0	0	-	-	GO:0016787//hydrolase activity	-	gi|170099884|ref|XP_001881160.1|/4.24793e-75/predicted protein [Laccaria bicolor S238N-H82]
GME3536_g	BU	0.36	0	0	0	ko04978//Mineral absorption	-	-	-	gi|389743299|gb|EIM84484.1|/1.75501e-24/CTR copper uptake transporter [Stereum hirsutum FP-91666 SS1]
GME6502_g	BU	0.36	0	0	0	-	-	GO:0016491//oxidoreductase activity	GO:0008152//metabolic process	gi|170098558|ref|XP_001880498.1|/1.03292e-153/predicted protein [Laccaria bicolor S238N-H82]
GME8861_g	BU	0.53	0	0	0	-	-	-	-	gi|336373077|gb|EGO01415.1|/4.91666e-53/hypothetical protein SERLA73DRAFT_103194 [Serpula lacrymans var. lacrymans S7.3]
GME3191_g	BU	0.71	0	0	0	-	-	-	-	gi|302672791|ref|XP_003026083.1|/9.21877e-67/hypothetical protein SCHCODRAFT_62630 [Schizophyllum commune H4-8]
GME3690_g	BU	0.36	0	0	0	-	-	-	-	-
GME7830_g	BU	0.71	0	0	0	-	-	-	-	gi|299754079|ref|XP_001833742.2|/4.54154e-21/hypothetical protein CC1G_11527 [Coprinopsis cinerea okayama7#130]
GME7685_g	BU	0.36	0	0	0	-	-	-	-	gi|169866484|ref|XP_001839829.1|/1.64629e-33/FRAS1 protein [Coprinopsis cinerea okayama7#130]
GME5213_g	BU	0.53	0	0	0	-	-	-	-	gi|170103482|ref|XP_001882956.1|/1.09146e-73/predicted protein [Laccaria bicolor S238N-H82]
GME9840_g	BU	0.53	0	0	0	ko01100//Metabolic pathways;ko00500//Starch and sucrose metabolism	-	GO:0016798//hydrolase activity, acting on glycosyl bonds;GO:0043167//ion binding	GO:0044238//primary metabolic process	gi|403411787|emb|CCL98487.1|/0/predicted protein [Fibroporia radiculosa]
GME7236_g	BU	0.53	0	0	0	ko05416//Viral myocarditis;ko03013//RNA transport	-	-	-	gi|336375056|gb|EGO03392.1|/2.15753e-19/hypothetical protein SERLA73DRAFT_119127 [Serpula lacrymans var. lacrymans S7.3]
GME7618_g	BU	1.07	0	0	0	-	-	-	-	gi|299754534|ref|XP_002911999.1|/3.04507e-19/hypothetical protein CC1G_14037 [Coprinopsis cinerea okayama7#130]
GME3807_g	BU	0.53	0	0	0	-	-	-	-	gi|170104567|ref|XP_001883497.1|/9.81801e-36/predicted protein [Laccaria bicolor S238N-H82]
GME2806_g	BU	0.36	0	0	0	-	-	-	-	gi|238581582|ref|XP_002389657.1|/4.47051e-13/hypothetical protein MPER_11184 [Moniliophthora perniciosa FA553]
GME2541_g	BU	0.53	0	0	0	ko04110//Cell cycle;ko04111//Cell cycle - yeast;ko04113//Meiosis - yeast	-	-	-	gi|170096592|ref|XP_001879516.1|/3.898e-143/predicted protein [Laccaria bicolor S238N-H82]
GME606_g	BU	0.36	0	0	0	ko01100//Metabolic pathways;ko00624//Polycyclic aromatic hydrocarbon degradation;ko00340//Histidine metabolism;ko00623//Toluene degradation;ko00627//Aminobenzoate degradation;ko00361//Chlorocyclohexane and chlorobenzene degradation;ko00363//Bisphenol degradation;ko00903//Limonene and pinene degradation;ko00626//Naphthalene degradation;ko01120//Microbial metabolism in diverse environments;ko01100/…	-	-	-	gi|403418520|emb|CCM05220.1|/1.6086e-108/predicted protein [Fibroporia radiculosa]
GME6587_g	BU	0.36	0	0	0	-	-	-	-	gi|403411979|emb|CCL98679.1|/8.25833e-15/predicted protein [Fibroporia radiculosa]
GME6294_g	BU	0.36	0	0	0	-	-	-	-	-
GME2226_g	BU	0.53	0	0	0	-	-	-	-	gi|170092034|ref|XP_001877239.1|/6.47458e-32/predicted protein [Laccaria bicolor S238N-H82]
GME11706_g	BU	0.36	0	0	0	-	-	GO:0009975//cyclase activity;GO:0005506//iron ion binding	GO:0006164//purine nucleotide biosynthetic process	gi|336364318|gb|EGN92678.1|/5.32469e-99/hypothetical protein SERLA73DRAFT_116968 [Serpula lacrymans var. lacrymans S7.3]
GME9704_g	BU	0.36	0	0	0	ko00642//Ethylbenzene degradation;ko01100//Metabolic pathways;ko00627//Aminobenzoate degradation;ko00051//Fructose and mannose metabolism;ko00362//Benzoate degradation;ko00240//Pyrimidine metabolism;ko00903//Limonene and pinene degradation;ko01120//Microbial metabolism in diverse environments;ko00350//Tyrosine metabolism;ko04070//Phosphatidylinositol signaling system;ko00562//Inositol phosphate m…	-	-	-	gi|389751202|gb|EIM92275.1|/2.81986e-85/fructosamine kinase PKL/CAK/FruK [Stereum hirsutum FP-91666 SS1]
GME5980_g	BU	0.53	0	0	0	-	-	-	-	gi|393244483|gb|EJD51995.1|/2.31634e-12/hypothetical protein AURDEDRAFT_111526 [Auricularia delicata TFB-10046 SS5]
GME9923_g	BU	0.36	0	0	0	ko01100//Metabolic pathways;ko00920//Sulfur metabolism;ko00270//Cysteine and methionine metabolism	-	-	-	gi|389740123|gb|EIM81315.1|/1.04129e-33/homoserine acetyltransferase [Stereum hirsutum FP-91666 SS1]
GME513_g	BU	0.53	0	0	0	-	-	-	-	gi|403411707|emb|CCL98407.1|/2.34733e-13/predicted protein [Fibroporia radiculosa]
GME147_g	BU	0.36	0	0	0	-	-	-	-	gi|170105184|ref|XP_001883805.1|/1.9847e-39/predicted protein [Laccaria bicolor S238N-H82]
GME1076_g	BU	0.53	0	0	0	ko05166//HTLV-I infection;ko01100//Metabolic pathways;ko00230//Purine metabolism;ko03410//Base excision repair;ko03030//DNA replication;ko03420//Nucleotide excision repair;ko00240//Pyrimidine metabolism;ko05152//Tuberculosis;ko04612//Antigen processing and presentation	GO:0043231//intracellular membrane-bounded organelle	GO:0003677//DNA binding	-	gi|392592350|gb|EIW81676.1|/5.21558e-58/histone-fold-containing protein [Coniophora puteana RWD-64-598 SS2]
GME6705_g	BU	0.36	0	0	0	-	-	-	-	-
GME1562_g	BU	0.53	0	0	0	-	-	-	-	gi|299742310|ref|XP_001832382.2|/2.36566e-34/hypothetical protein CC1G_07642 [Coprinopsis cinerea okayama7#130]
GME1362_g	BU	0.36	0	0	0	-	-	-	-	gi|395326394|gb|EJF58804.1|/0/hypothetical protein DICSQDRAFT_172627 [Dichomitus squalens LYAD-421 SS1]
GME4472_g	EG	0	0.67	0	0	-	-	-	-	gi|336375885|gb|EGO04220.1|/6.39559e-07/hypothetical protein SERLA73DRAFT_128372 [Serpula lacrymans var. lacrymans S7.3]
GME1936_g	EG	0	0.33	0	0	ko04111//Cell cycle - yeast	-	-	GO:0009987//cellular process	gi|170089931|ref|XP_001876188.1|/0/predicted protein [Laccaria bicolor S238N-H82]
GME6665_g	EG	0	0.33	0	0	-	-	-	GO:0006412//translation	gi|170097473|ref|XP_001879956.1|/5.18394e-76/predicted protein [Laccaria bicolor S238N-H82]
GME117_g	EG	0	0.33	0	0	-	-	-	-	gi|170109992|ref|XP_001886202.1|/1.82534e-13/predicted protein [Laccaria bicolor S238N-H82]
GME7545_g	EG	0	0.33	0	0	-	-	-	-	-
GME11579_g	EG	0	0.5	0	0	-	-	-	-	gi|389742278|gb|EIM83465.1|/1.59351e-13/hypothetical protein STEHIDRAFT_160047 [Stereum hirsutum FP-91666 SS1]
GME2206_g	EG	0	0.67	0	0	-	-	-	-	gi|403416488|emb|CCM03188.1|/3.01129e-27/predicted protein [Fibroporia radiculosa]
GME2493_g	EG	0	1.17	0	0	-	-	-	-	-
GME5927_g	EG	0	0.33	0	0	ko00230//Purine metabolism;ko04110//Cell cycle;ko04114//Oocyte meiosis;ko04111//Cell cycle - yeast;ko04113//Meiosis - yeast	-	GO:0005488//binding	GO:0009987//cellular process	gi|170090358|ref|XP_001876401.1|/0/predicted protein [Laccaria bicolor S238N-H82]
GME5227_g	EG	0	0.5	0	0	-	-	-	-	gi|390597680|gb|EIN07079.1|/2.13974e-08/hypothetical protein PUNSTDRAFT_144639 [Punctularia strigosozonata HHB-11173 SS5]
GME10738_g	EG	0	0.33	0	0	-	-	-	-	gi|170087070|ref|XP_001874758.1|/4.66725e-42/predicted protein [Laccaria bicolor S238N-H82]
GME4090_g	EG	0	0.84	0	0	-	-	GO:0005488//binding;GO:0016817//hydrolase activity, acting on acid anhydrides	-	gi|169866863|ref|XP_001840016.1|/2.83403e-10/ATP-dependent RNA helicase suv3 [Coprinopsis cinerea okayama7#130]
GME11683_g	EG	0	0.33	0	0	-	-	GO:0016791//phosphatase activity	-	gi|170084139|ref|XP_001873293.1|/2.28331e-90/predicted protein [Laccaria bicolor S238N-H82]
GME5777_g	EG	0	0.67	0	0	ko00650//Butanoate metabolism;ko04146//Peroxisome;ko01100//Metabolic pathways;ko00280//Valine, leucine and isoleucine degradation;ko00072//Synthesis and degradation of ketone bodies;ko00281//Geraniol degradation;ko01110//Biosynthesis of secondary metabolites	-	-	-	gi|392563034|gb|EIW56214.1|/5.57889e-41/hypothetical protein TRAVEDRAFT_22528 [Trametes versicolor FP-101664 SS1]
GME9813_g	EG	0	0.67	0	0	-	-	-	-	gi|170106187|ref|XP_001884305.1|/1.41045e-28/predicted protein [Laccaria bicolor S238N-H82]
GME5614_g	EG	0	0.33	0	0	-	-	-	-	gi|170104116|ref|XP_001883272.1|/2.0688e-36/predicted protein [Laccaria bicolor S238N-H82]
GME2851_g	EG	0	0.5	0	0	ko03008//Ribosome biogenesis in eukaryotes	-	GO:0004672//protein kinase activity;GO:0032559	GO:0006464//cellular protein modification process	gi|302682374|ref|XP_003030868.1|/2.58928e-144/hypothetical protein SCHCODRAFT_68367 [Schizophyllum commune H4-8]
GME5253_g	EG	0	0.5	0	0	-	-	-	-	gi|390604702|gb|EIN14093.1|/4.48827e-28/hypothetical protein PUNSTDRAFT_41419 [Punctularia strigosozonata HHB-11173 SS5]
GME10117_g	EG	0	0.67	0	0	-	-	-	-	gi|170092455|ref|XP_001877449.1|/3.57222e-100/predicted protein [Laccaria bicolor S238N-H82]
GME3868_g	EG	0	0.33	0	0	-	-	-	-	gi|170113984|ref|XP_001888190.1|/1.61519e-45/predicted protein [Laccaria bicolor S238N-H82]
GME533_g	EG	0	0.33	0	0	-	-	-	-	gi|299738900|ref|XP_001834878.2|/1.7895e-13/hypothetical protein CC1G_09805 [Coprinopsis cinerea okayama7#130]
GME5842_g	EG	0	0.67	0	0	-	GO:0043231//intracellular membrane-bounded organelle	GO:0046914//transition metal ion binding;GO:0003676//nucleic acid binding	-	gi|393213785|gb|EJC99280.1|/1.79216e-90/SWIRM-domain-containing protein [Fomitiporia mediterranea MF3/22]
GME5351_g	EG	0	1.17	0	0	-	-	-	-	gi|302692062|ref|XP_003035710.1|/1.57914e-15/hypothetical protein SCHCODRAFT_255887 [Schizophyllum commune H4-8]
GME11095_g	EG	0	0.67	0	0	-	-	-	-	gi|302682400|ref|XP_003030881.1|/1.81869e-11/hypothetical protein SCHCODRAFT_235308 [Schizophyllum commune H4-8]
GME196_g	EG	0	0.5	0	0	-	-	-	-	gi|299740273|ref|XP_002910302.1|/1.26963e-16/hypothetical protein CC1G_15731 [Coprinopsis cinerea okayama7#130]
GME7123_g	EG	0	0.84	0	0	-	-	GO:0003676//nucleic acid binding	GO:0006259//DNA metabolic process	gi|7248353|dbj|BAA92703.1|/7.67954e-37/reverse transcriptase [Tricholoma magnivelare]
GME5595_g	EG	0	0.33	0	0	-	-	-	-	gi|170105998|ref|XP_001884211.1|/3.38097e-92/predicted protein [Laccaria bicolor S238N-H82]
GME2522_g	EG	0	0.33	0	0	-	-	-	-	gi|336374703|gb|EGO03040.1|/2.11189e-08/hypothetical protein SERLA73DRAFT_158694 [Serpula lacrymans var. lacrymans S7.3]
GME5809_g	EG	0	0.5	0	0	ko03010//Ribosome	GO:0030529//ribonucleoprotein complex	-	-	gi|367051567|ref|XP_003656162.1|/1.10181e-46/60S ribosomal protein L23 [Thielavia terrestris NRRL 8126]
GME10685_g	EG	0	0.33	0	0	-	-	-	-	-
GME1549_g	EG	0	1.34	0	0	-	-	-	-	gi|170099654|ref|XP_001881045.1|/1.57324e-45/predicted protein [Laccaria bicolor S238N-H82]
GME5854_g	EG	0	0.5	0	0	-	-	GO:0003824//catalytic activity	-	gi|399137112|gb|AFP23133.1|/2.56993e-113/endoglucanase II [Volvariella volvacea]
GME10111_g	EG	0	0.5	0	0	-	-	-	-	gi|170092447|ref|XP_001877445.1|/1.32982e-08/predicted protein [Laccaria bicolor S238N-H82]
GME1272_g	EG	0	0.33	0	0	-	-	-	-	-
GME4646_g	EG	0	0.33	0	0	-	-	-	-	-
GME8471_g	EG	0	0.5	0	0	ko05322//Systemic lupus erythematosus;ko05202//Transcriptional misregulation in cancer;ko05034//Alcoholism	GO:0000785//chromatin;GO:0043231//intracellular membrane-bounded organelle	GO:0003676//nucleic acid binding	GO:0034728//nucleosome organization	gi|390601077|gb|EIN10471.1|/3.24197e-52/histone-fold-containing protein [Punctularia strigosozonata HHB-11173 SS5]
GME2418_g	EG	0	0.33	0	0	-	-	-	-	gi|300431582|tpe|CBL43327.1|/2.17057e-21/TPA: arylamine N-acetyltransferase 1 [Coprinopsis cinerea]
GME5091_g	EG	0	0.33	0	0	-	-	-	-	gi|238581974|ref|XP_002389784.1|/1.61649e-12/hypothetical protein MPER_11041 [Moniliophthora perniciosa FA553]
GME466_g	EG	0	0.33	0	0	-	-	-	-	gi|170113984|ref|XP_001888190.1|/4.02736e-36/predicted protein [Laccaria bicolor S238N-H82]
GME3824_g	EG	0	0.33	0	0	-	-	GO:0008233//peptidase activity	-	gi|141493223|gb|ABL98208.2|/2.88348e-106/serine protease [Hypsizygus marmoreus]
GME4697_g	EG	0	0.5	0	0	-	-	-	-	-
GME3720_g	EG	0	0.33	0	0	-	-	-	-	-
GME8762_g	EG	0	0.33	0	0	-	-	-	-	gi|393215352|gb|EJD00843.1|/1.0201e-27/hypothetical protein FOMMEDRAFT_157951 [Fomitiporia mediterranea MF3/22]
GME4660_g	EG	0	0.33	0	0	ko01100//Metabolic pathways;ko00520//Amino sugar and nucleotide sugar metabolism;ko00500//Starch and sucrose metabolism;ko01110//Biosynthesis of secondary metabolites	-	GO:0016787//hydrolase activity	GO:0005975//carbohydrate metabolic process	gi|393244235|gb|EJD51748.1|/1.88785e-93/cellulose-growth-specific protein [Auricularia delicata TFB-10046 SS5]
GME2119_g	EG	0	0.67	0	0	-	-	-	-	gi|170089345|ref|XP_001875895.1|/4.23881e-63/predicted protein [Laccaria bicolor S238N-H82]
GME5821_g	EG	0	1	0	0	-	-	-	-	-
GME6362_g	EG	0	0.33	0	0	-	-	-	-	-
GME6996_g	EG	0	0.5	0	0	-	-	-	-	gi|170101957|ref|XP_001882195.1|/2.11927e-54/predicted protein [Laccaria bicolor S238N-H82]
GME2715_g	EG	0	0.33	0	0	-	-	-	-	gi|299748315|ref|XP_001837604.2|/7.38333e-11/hypothetical protein CC1G_08158 [Coprinopsis cinerea okayama7#130]
GME7348_g	EG	0	0.33	0	0	-	-	-	-	gi|299739938|ref|XP_001840363.2|/8.61918e-76/L-ornithine transporter [Coprinopsis cinerea okayama7#130]
GME9181_g	EG	0	0.67	0	0	-	GO:0043231//intracellular membrane-bounded organelle	-	GO:0006351//transcription, DNA-dependent	gi|403411548|emb|CCL98248.1|/3.55268e-106/predicted protein [Fibroporia radiculosa]
GME3732_g	EG	0	0.33	0	0	-	-	-	-	gi|170099904|ref|XP_001881170.1|/1.62299e-17/predicted protein [Laccaria bicolor S238N-H82]
GME8417_g	EG	0	0.5	0	0	-	-	-	-	-
GME10311_g	EG	0	0.33	0	0	-	-	-	-	-
GME8175_g	EG	0	1	0	0	-	-	-	-	gi|336383634|gb|EGO24783.1|/2.3287e-111/hypothetical protein SERLADRAFT_415754 [Serpula lacrymans var. lacrymans S7.9]
GME4139_g	EG	0	0.33	0	0	-	-	GO:0003676//nucleic acid binding	-	gi|5002510|dbj|BAA78625.1|/2.78321e-144/reverse transcriptase-RNase H-integrase [Tricholoma matsutake]
GME3838_g	EG	0	0.33	0	0	ko03450//Non-homologous end-joining	GO:0044428//nuclear part	GO:0003676//nucleic acid binding;GO:0003678//DNA helicase activity	GO:0000726	gi|170094156|ref|XP_001878299.1|/0/predicted protein [Laccaria bicolor S238N-H82]
GME9190_g	EG	0	0.33	0	0	-	-	-	-	gi|170090576|ref|XP_001876510.1|/2.45121e-144/predicted protein [Laccaria bicolor S238N-H82]
GME3946_g	EG	0	1.67	0	0	-	-	-	-	gi|170108848|ref|XP_001885632.1|/7.70481e-69/predicted protein [Laccaria bicolor S238N-H82]
GME8129_g	EG	0	0.84	0	0	ko01100//Metabolic pathways;ko00052//Galactose metabolism;ko00520//Amino sugar and nucleotide sugar metabolism;ko01110//Biosynthesis of secondary metabolites;ko01100//Metabolic pathways;ko00052//Galactose metabolism;ko00520//Amino sugar and nucleotide sugar metabolism;ko00010//Glycolysis / Gluconeogenesis;ko01110//Biosynthesis of secondary metabolites	-	-	-	gi|170098933|ref|XP_001880685.1|/1.29427e-66/predicted protein [Laccaria bicolor S238N-H82]
GME6255_g	EG	0	0.67	0	0	-	-	-	-	gi|393214628|gb|EJD00121.1|/1.79926e-41/hypothetical protein FOMMEDRAFT_30783 [Fomitiporia mediterranea MF3/22]
GME11672_g	EG	0	0.33	0	0	-	-	-	-	gi|170084135|ref|XP_001873291.1|/3.46986e-25/predicted protein [Laccaria bicolor S238N-H82]
GME5644_g	EG	0	0.33	0	0	-	-	-	-	gi|299748894|ref|XP_001840226.2|/2.15456e-51/hypothetical protein CC1G_02689 [Coprinopsis cinerea okayama7#130]
GME4448_g	EG	0	1.34	0	0	ko05166//HTLV-I infection;ko03430//Mismatch repair;ko01100//Metabolic pathways;ko00230//Purine metabolism;ko03440//Homologous recombination;ko03410//Base excision repair;ko03030//DNA replication;ko03420//Nucleotide excision repair;ko00240//Pyrimidine metabolism	-	-	-	gi|392595171|gb|EIW84495.1|/6.98329e-15/hypothetical protein CONPUDRAFT_163601, partial [Coniophora puteana RWD-64-598 SS2]
GME5571_g	EG	0	0.5	0	0	-	-	-	-	gi|403412425|emb|CCL99125.1|/1.96365e-22/predicted protein [Fibroporia radiculosa]
GME1210_g	EG	0	0.33	0	0	-	-	-	-	gi|336370379|gb|EGN98719.1|/0/hypothetical protein SERLA73DRAFT_168336 [Serpula lacrymans var. lacrymans S7.3]
GME12019_g	EG	0	1.34	0	0	-	-	GO:0003676//nucleic acid binding	-	gi|238578247|ref|XP_002388652.1|/5.22047e-120/hypothetical protein MPER_12301 [Moniliophthora perniciosa FA553]
GME5457_g	EG	0	0.33	0	0	ko01100//Metabolic pathways;ko05143//African trypanosomiasis;ko00380//Tryptophan metabolism	-	-	-	gi|170087380|ref|XP_001874913.1|/9.91687e-107/predicted protein [Laccaria bicolor S238N-H82]
GME4589_g	EG	0	0.33	0	0	ko00624//Polycyclic aromatic hydrocarbon degradation;ko01100//Metabolic pathways;ko00627//Aminobenzoate degradation;ko00363//Bisphenol degradation;ko01110//Biosynthesis of secondary metabolites;ko00903//Limonene and pinene degradation;ko00945//Stilbenoid, diarylheptanoid and gingerol biosynthesis;ko01120//Microbial metabolism in diverse environments;ko01100//Metabolic pathways;ko00360//Phenylalan…	-	GO:0016491//oxidoreductase activity;GO:0005506//iron ion binding	-	gi|299740859|ref|XP_001834057.2|/1.4553e-168/cytochrome P450 [Coprinopsis cinerea okayama7#130]
GME3086_g	EG	0	0.33	0	0	-	-	-	-	gi|299745748|ref|XP_001831924.2|/2.18558e-29/hypothetical protein CC1G_12899 [Coprinopsis cinerea okayama7#130]
GME10213_g	EG	0	0.5	0	0	-	-	-	-	gi|389745494|gb|EIM86675.1|/1.17065e-89/Ser/Thr protein phosphatase protein [Stereum hirsutum FP-91666 SS1]
GME1567_g	EG	0	0.33	0	0	ko04120//Ubiquitin mediated proteolysis	GO:0044424//intracellular part	GO:0008757//S-adenosylmethionine-dependent methyltransferase activity	GO:0043412//macromolecule modification;GO:0006730//one-carbon metabolic process	gi|299741823|ref|XP_002910494.1|/2.88977e-85/Pcmt1-prov protein [Coprinopsis cinerea okayama7#130]
GME998_g	EG	0	0.67	0	0	-	-	-	-	gi|299752231|ref|XP_001830789.2|/0/hypothetical protein CC1G_03326 [Coprinopsis cinerea okayama7#130]
GME6906_g	EG	0	0.67	0	0	-	-	-	-	gi|170096468|ref|XP_001879454.1|/6.06821e-76/predicted protein [Laccaria bicolor S238N-H82]
GME5981_g	EG	0	0.84	0	0	-	-	-	-	gi|395326897|gb|EJF59301.1|/3.53935e-171/hypothetical protein DICSQDRAFT_156307 [Dichomitus squalens LYAD-421 SS1]
GME10087_g	EG	0	0.33	0	0	-	-	-	-	gi|299752141|ref|XP_001830727.2|/3.96142e-27/hypothetical protein CC1G_03264 [Coprinopsis cinerea okayama7#130]
GME5832_g	EG	0	0.33	0	0	-	-	-	GO:0006810//transport	gi|299747115|ref|XP_001841270.2|/1.63723e-72/UDP-N-acetylglucosamine transporter [Coprinopsis cinerea okayama7#130]
GME498_g	EG	0	0.5	0	0	-	-	-	-	gi|299738900|ref|XP_001834878.2|/9.33709e-15/hypothetical protein CC1G_09805 [Coprinopsis cinerea okayama7#130]
GME6515_g	EG	0	0.33	0	0	-	-	-	-	gi|402217894|gb|EJT97973.1|/6.42275e-40/kinase-like protein [Dacryopinax sp. DJM-731 SS1]
GME10082_g	EG	0	0.33	0	0	ko03460//Fanconi anemia pathway;ko04146//Peroxisome	-	-	GO:0006810//transport	gi|169848347|ref|XP_001830881.1|/0/hypothetical protein CC1G_02332 [Coprinopsis cinerea okayama7#130]
GME2155_g	EG	0	0.33	0	0	-	-	-	-	gi|169858267|ref|XP_001835779.1|/1.07805e-17/hypothetical protein CC1G_11684 [Coprinopsis cinerea okayama7#130]
GME9727_g	EG	0	0.33	0	0	-	-	-	-	gi|299756118|ref|XP_001829107.2|/1.11442e-86/hypothetical protein CC1G_01787 [Coprinopsis cinerea okayama7#130]
GME5478_g	EG	0	0.33	0	0	-	-	GO:0016740//transferase activity	-	gi|299753353|ref|XP_001833218.2|/3.37454e-99/methyltransferase domain-containing protein [Coprinopsis cinerea okayama7#130]
GME2079_g	EG	0	1.67	0	0	ko04113//Meiosis - yeast	-	GO:0004672//protein kinase activity;GO:0032559	GO:0006464//cellular protein modification process	gi|403419514|emb|CCM06214.1|/4.02749e-142/predicted protein [Fibroporia radiculosa]
GME4059_g	EG	0	0.5	0	0	-	-	-	-	gi|299754373|ref|XP_001839979.2|/5.03491e-24/hypothetical protein CC1G_12508 [Coprinopsis cinerea okayama7#130]
GME4258_g	EG	0	0.33	0	0	-	-	-	-	gi|170086776|ref|XP_001874611.1|/4.13574e-74/predicted protein [Laccaria bicolor S238N-H82]
GME2945_g	EG	0	1.84	0	0	-	-	-	-	gi|395323604|gb|EJF56069.1|/2.09653e-76/hypothetical protein DICSQDRAFT_175265 [Dichomitus squalens LYAD-421 SS1]
GME8986_g	EG	0	0.33	0	0	-	-	GO:0003824//catalytic activity	-	gi|170087260|ref|XP_001874853.1|/2.06407e-90/glycoside hydrolase family 5 protein [Laccaria bicolor S238N-H82]
GME9383_g	EG	0	0.5	0	0	-	-	-	-	gi|170109992|ref|XP_001886202.1|/6.27262e-26/predicted protein [Laccaria bicolor S238N-H82]
GME6179_g	EG	0	0.33	0	0	ko01100//Metabolic pathways;ko00520//Amino sugar and nucleotide sugar metabolism;ko00500//Starch and sucrose metabolism;ko01110//Biosynthesis of secondary metabolites	-	-	-	gi|169862699|ref|XP_001837975.1|/3.47876e-98/endoglucanase-4 [Coprinopsis cinerea okayama7#130]
GME11111_g	EG	0	0.5	0	0	-	-	-	-	gi|330935391|ref|XP_003304944.1|/3.57804e-58/hypothetical protein PTT_17678 [Pyrenophora teres f. teres 0-1]
GME2651_g	EG	0	0.33	0	0	-	-	-	-	gi|393220628|gb|EJD06114.1|/1.46099e-19/hypothetical protein FOMMEDRAFT_153486 [Fomitiporia mediterranea MF3/22]
GME11989_g	EG	0	0.33	0	0	-	-	-	-	-
GME10_g	EG	0	0.33	0	0	-	-	-	-	gi|336368413|gb|EGN96756.1|/1.11863e-14/hypothetical protein SERLA73DRAFT_161770 [Serpula lacrymans var. lacrymans S7.3]
GME3282_g	EG	0	0.5	0	0	-	-	-	-	gi|389738595|gb|EIM79792.1|/1.08432e-75/hypothetical protein STEHIDRAFT_116273 [Stereum hirsutum FP-91666 SS1]
GME9944_g	EG	0	0.67	0	0	-	-	-	-	gi|169846806|ref|XP_001830117.1|/2.30155e-49/hypothetical protein CC1G_04550 [Coprinopsis cinerea okayama7#130]
GME2794_g	EG	0	0.5	0	0	-	-	-	-	gi|224831581|gb|ACN66790.1|/1.20307e-11/granulin-like protein [Piriformospora indica]
GME8121_g	EG	0	0.33	0	0	-	-	-	-	-
GME1105_g	EG	0	0.33	0	0	ko03050//Proteasome	GO:0005839//proteasome core complex;GO:0043231//intracellular membrane-bounded organelle	GO:0004175//endopeptidase activity	GO:0019941//modification-dependent protein catabolic process	gi|336373148|gb|EGO01486.1|/1.33237e-113/hypothetical protein SERLA73DRAFT_176788 [Serpula lacrymans var. lacrymans S7.3]
GME8260_g	EG	0	0.5	0	0	-	-	-	-	gi|336371562|gb|EGN99901.1|/0/hypothetical protein SERLA73DRAFT_106779 [Serpula lacrymans var. lacrymans S7.3]
GME6352_g	EG	0	1	0	0	-	-	-	-	-
GME5355_g	EG	0	0.84	0	0	ko04113//Meiosis - yeast	-	-	-	gi|170087448|ref|XP_001874947.1|/4.71652e-134/predicted protein [Laccaria bicolor S238N-H82]
GME3577_g	EG	0	0.67	0	0	-	-	-	-	gi|170115779|ref|XP_001889083.1|/3.45006e-57/predicted protein [Laccaria bicolor S238N-H82]
GME5866_g	EG	0	1.34	0	0	-	-	-	-	gi|238582519|ref|XP_002389957.1|/7.79942e-36/hypothetical protein MPER_10847 [Moniliophthora perniciosa FA553]
GME11729_g	EG	0	0.33	0	0	-	-	-	-	gi|336374426|gb|EGO02763.1|/7.26697e-146/hypothetical protein SERLA73DRAFT_176125 [Serpula lacrymans var. lacrymans S7.3]
GME1418_g	EG	0	0.33	0	0	-	-	-	-	gi|170109101|ref|XP_001885758.1|/3.9981e-39/predicted protein [Laccaria bicolor S238N-H82]
GME7058_g	EG	0	0.33	0	0	ko00624//Polycyclic aromatic hydrocarbon degradation;ko01100//Metabolic pathways;ko00627//Aminobenzoate degradation;ko00363//Bisphenol degradation;ko01110//Biosynthesis of secondary metabolites;ko00903//Limonene and pinene degradation;ko00945//Stilbenoid, diarylheptanoid and gingerol biosynthesis;ko01120//Microbial metabolism in diverse environments	-	-	-	gi|392563156|gb|EIW56335.1|/5.02407e-110/cytochrome P450 [Trametes versicolor FP-101664 SS1]
GME4689_g	EG	0	0.5	0	0	-	-	-	-	-
GME2572_g	EG	0	0.5	0	0	-	-	-	-	-
GME11047_g	EG	0	0.5	0	0	-	-	-	-	gi|392562951|gb|EIW56131.1|/4.1044e-90/hypothetical protein TRAVEDRAFT_39145 [Trametes versicolor FP-101664 SS1]
GME12073_g	EG	0	0.67	0	0	-	-	-	-	-
GME805_g	EG	0	0.33	0	0	ko01100//Metabolic pathways;ko00230//Purine metabolism;ko03030//DNA replication;ko00240//Pyrimidine metabolism	-	GO:0003899//DNA-directed RNA polymerase activity	GO:0006259//DNA metabolic process	gi|392561742|gb|EIW54923.1|/2.30664e-147/prim-pol domain-containing protein [Trametes versicolor FP-101664 SS1]
GME838_g	EG	0	0.33	0	0	-	-	GO:0005488//binding	-	gi|336384460|gb|EGO25608.1|/0/hypothetical protein SERLADRAFT_448570 [Serpula lacrymans var. lacrymans S7.9]
GME58_g	EG	0	0.33	0	0	-	-	-	-	-
GME2496_g	EG	0	0.84	0	0	ko01100//Metabolic pathways;ko00240//Pyrimidine metabolism	-	GO:0003824//catalytic activity	GO:0008152//metabolic process	gi|336366225|gb|EGN94573.1|/2.16717e-82/hypothetical protein SERLA73DRAFT_188544 [Serpula lacrymans var. lacrymans S7.3]
GME3358_g	EG	0	0.67	0	0	-	-	-	-	gi|336368413|gb|EGN96756.1|/3.08939e-25/hypothetical protein SERLA73DRAFT_161770 [Serpula lacrymans var. lacrymans S7.3]
GME7049_g	EG	0	0.33	0	0	ko05166//HTLV-I infection;ko04120//Ubiquitin mediated proteolysis;ko04110//Cell cycle;ko04114//Oocyte meiosis;ko04111//Cell cycle - yeast;ko04113//Meiosis - yeast	-	-	-	gi|336385453|gb|EGO26600.1|/5.82023e-147/hypothetical protein SERLADRAFT_414564 [Serpula lacrymans var. lacrymans S7.9]
GME10907_g	EG	0	0.33	0	0	-	-	-	-	gi|170104116|ref|XP_001883272.1|/4.32681e-68/predicted protein [Laccaria bicolor S238N-H82]
GME5463_g	EG	0	0.84	0	0	-	-	-	-	gi|336367299|gb|EGN95644.1|/7.84957e-51/hypothetical protein SERLA73DRAFT_186777 [Serpula lacrymans var. lacrymans S7.3]
GME10185_g	EG	0	0.5	0	0	-	-	-	-	-
GME5978_g	EG	0	0.33	0	0	-	-	-	-	gi|170100090|ref|XP_001881263.1|/3.67113e-47/predicted protein [Laccaria bicolor S238N-H82]
GME10986_g	EG	0	1	0	0	ko01100//Metabolic pathways;ko00052//Galactose metabolism;ko00740//Riboflavin metabolism;ko00500//Starch and sucrose metabolism;ko03040//Spliceosome	-	-	-	gi|389746160|gb|EIM87340.1|/8.10391e-33/kinase-like protein [Stereum hirsutum FP-91666 SS1]
GME4060_g	EG	0	0.33	0	0	ko02010//ABC transporters;ko02010//ABC transporters;ko04976//Bile secretion	-	-	-	gi|336380282|gb|EGO21436.1|/4.23874e-87/hypothetical protein SERLADRAFT_417697 [Serpula lacrymans var. lacrymans S7.9]
GME2685_g	EG	0	0.33	0	0	-	-	-	-	gi|170101927|ref|XP_001882180.1|/1.91133e-60/predicted protein [Laccaria bicolor S238N-H82]
GME5700_g	EG	0	0.33	0	0	ko00460//Cyanoamino acid metabolism;ko01100//Metabolic pathways;ko00250//Alanine, aspartate and glutamate metabolism;ko00330//Arginine and proline metabolism;ko00910//Nitrogen metabolism;ko01110//Biosynthesis of secondary metabolites	-	GO:0016639//oxidoreductase activity, acting on the CH-NH2 group of donors, NAD or NADP as acceptor	GO:0019752//carboxylic acid metabolic process	gi|302678341|ref|XP_003028853.1|/0/hypothetical protein SCHCODRAFT_69850 [Schizophyllum commune H4-8]
GME3298_g	EG	0	0.5	0	0	-	-	-	-	-
GME1591_g	EG	0	0.33	0	0	-	-	-	-	-
GME8620_g	EG	0	0.67	0	0	-	-	-	-	gi|403418115|emb|CCM04815.1|/1.71778e-56/predicted protein [Fibroporia radiculosa]
GME2530_g	EG	0	0.5	0	0	-	-	-	-	-
GME6451_g	EG	0	0.5	0	0	-	-	GO:0004553//hydrolase activity, hydrolyzing O-glycosyl compounds;GO:0005488//binding	GO:0005975//carbohydrate metabolic process	gi|390600641|gb|EIN10036.1|/1.22437e-132/endo-1,4-beta-xylanase A precursor [Punctularia strigosozonata HHB-11173 SS5]
GME40_g	EG	0	0.84	0	0	-	-	-	-	gi|358396547|gb|EHK45928.1|/3.52632e-25/hypothetical protein TRIATDRAFT_283530 [Trichoderma atroviride IMI 206040]
GME2250_g	EG	0	0.33	0	0	-	-	-	-	gi|170103344|ref|XP_001882887.1|/5.63268e-52/predicted protein [Laccaria bicolor S238N-H82]
GME6817_g	EG	0	0.5	0	0	ko04113//Meiosis - yeast	GO:0016020//membrane	-	GO:0006810//transport	gi|302684805|ref|XP_003032083.1|/4.06669e-138/hypothetical protein SCHCODRAFT_67843 [Schizophyllum commune H4-8]
GME8261_g	EG	0	0.84	0	0	-	-	-	-	gi|336383628|gb|EGO24777.1|/1.38965e-57/hypothetical protein SERLADRAFT_468580 [Serpula lacrymans var. lacrymans S7.9]
GME3275_g	EG	0	0.33	0	0	-	-	-	-	gi|403419263|emb|CCM05963.1|/9.03787e-92/predicted protein [Fibroporia radiculosa]
GME10900_g	EG	0	0.84	0	0	-	-	-	-	gi|170096863|ref|XP_001879651.1|/1.8038e-38/predicted protein [Laccaria bicolor S238N-H82]
GME9482_g	EG	0	0.33	0	0	-	-	-	-	gi|403417403|emb|CCM04103.1|/1.78724e-11/predicted protein [Fibroporia radiculosa]
GME3929_g	EG	0	0.67	0	0	-	-	-	-	gi|170108848|ref|XP_001885632.1|/2.44245e-70/predicted protein [Laccaria bicolor S238N-H82]
GME1656_g	EG	0	0.84	0	0	-	-	-	-	gi|392590902|gb|EIW80230.1|/2.43927e-09/hypothetical protein CONPUDRAFT_154277 [Coniophora puteana RWD-64-598 SS2]
GME1420_g	EG	0	0.33	0	0	-	-	-	-	-
GME7301_g	EG	0	0.33	0	0	-	-	-	-	-
GME2368_g	EG	0	0.33	0	0	-	-	-	-	gi|170107687|ref|XP_001885053.1|/9.82282e-13/predicted protein [Laccaria bicolor S238N-H82]
GME6121_g	EG	0	0.33	0	0	-	-	GO:0005488//binding	-	gi|170113994|ref|XP_001888195.1|/1.35054e-164/predicted protein [Laccaria bicolor S238N-H82]
GME8910_g	EG	0	0.33	0	0	-	-	-	-	gi|393216551|gb|EJD02041.1|/0/hypothetical protein FOMMEDRAFT_141224 [Fomitiporia mediterranea MF3/22]
GME6087_g	EG	0	0.5	0	0	-	-	-	-	gi|169868123|ref|XP_001840636.1|/3.9583e-08/hypothetical protein CC1G_11284 [Coprinopsis cinerea okayama7#130]
GME2502_g	EG	0	0.33	0	0	-	-	-	-	-
GME9780_g	EG	0	0.33	0	0	-	-	GO:0005488//binding	-	gi|5002510|dbj|BAA78625.1|/0/reverse transcriptase-RNase H-integrase [Tricholoma matsutake]
GME1818_g	EG	0	0.33	0	0	-	-	GO:0004672//protein kinase activity;GO:0032559	GO:0006464//cellular protein modification process	gi|169857622|ref|XP_001835459.1|/1.54916e-151/other/AUR protein kinase [Coprinopsis cinerea okayama7#130]
GME2548_g	EG	0	0.33	0	0	-	-	-	-	gi|336381317|gb|EGO22469.1|/9.8407e-08/hypothetical protein SERLADRAFT_409958 [Serpula lacrymans var. lacrymans S7.9]
GME1902_g	EG	0	0.33	0	0	ko01100//Metabolic pathways;ko04122//Sulfur relay system;ko00730//Thiamine metabolism;ko00400//Phenylalanine, tyrosine and tryptophan biosynthesis;ko01110//Biosynthesis of secondary metabolites	-	GO:0016765//transferase activity, transferring alkyl or aryl (other than methyl) groups	GO:0008652//cellular amino acid biosynthetic process	gi|170089315|ref|XP_001875880.1|/1.89404e-144/predicted protein [Laccaria bicolor S238N-H82]
GME6204_g	EG	0	0.5	0	0	-	-	-	-	gi|336374506|gb|EGO02843.1|/1.27871e-19/hypothetical protein SERLA73DRAFT_176266 [Serpula lacrymans var. lacrymans S7.3]
GME9900_g	EG	0	2.01	0	0	-	-	-	-	gi|169847089|ref|XP_001830256.1|/0/hypothetical protein CC1G_01892 [Coprinopsis cinerea okayama7#130]
GME369_g	EG	0	0.33	0	0	-	-	-	-	-
GME3299_g	EG	0	0.33	0	0	-	-	-	-	gi|393213518|gb|EJC99014.1|/6.08469e-28/kinase-like protein [Fomitiporia mediterranea MF3/22]
GME9144_g	EG	0	0.84	0	0	-	-	-	-	gi|170109101|ref|XP_001885758.1|/2.75327e-62/predicted protein [Laccaria bicolor S238N-H82]
GME4253_g	EG	0	0.33	0	0	-	-	-	-	gi|299745099|ref|XP_002910867.1|/5.54133e-97/hypothetical protein CC1G_14844 [Coprinopsis cinerea okayama7#130]
GME5697_g	EG	0	0.84	0	0	ko00300//Lysine biosynthesis;ko01100//Metabolic pathways;ko00270//Cysteine and methionine metabolism;ko01120//Microbial metabolism in diverse environments;ko01110//Biosynthesis of secondary metabolites;ko00260//Glycine, serine and threonine metabolism	-	GO:0031406//carboxylic acid binding;GO:0016774//phosphotransferase activity, carboxyl group as acceptor	GO:0006520//cellular amino acid metabolic process;GO:0006796//phosphate-containing compound metabolic process	gi|390599676|gb|EIN09072.1|/1.94375e-39/aspartate kinase [Punctularia strigosozonata HHB-11173 SS5]
GME10103_g	EG	0	0.33	0	0	-	-	-	-	-
GME613_g	EG	0	0.33	0	0	-	-	-	-	gi|299753675|ref|XP_001833417.2|/1.48691e-09/hypothetical protein CC1G_05117 [Coprinopsis cinerea okayama7#130]
GME542_g	EG	0	0.33	0	0	-	-	-	-	gi|42416980|gb|AAO72981.2|/0/laccase 1 [Volvariella volvacea]
GME2311_g	EG	0	0.33	0	0	-	-	GO:0005488//binding;GO:0003824//catalytic activity	GO:0008152//metabolic process	gi|170108939|ref|XP_001885677.1|/1.19591e-107/predicted protein [Laccaria bicolor S238N-H82]
GME7743_g	EG	0	0.33	0	0	-	-	-	-	-
GME2503_g	EG	0	0.33	0	0	-	-	-	-	gi|403414391|emb|CCM01091.1|/1.35134e-11/predicted protein [Fibroporia radiculosa]
GME3205_g	EG	0	1	0	0	-	-	-	-	-
GME8181_g	EG	0	0.33	0	0	-	-	-	-	gi|392590024|gb|EIW79354.1|/2.1977e-10/hypothetical protein CONPUDRAFT_167111 [Coniophora puteana RWD-64-598 SS2]
GME7817_g	EG	0	0.33	0	0	ko03430//Mismatch repair;ko03030//DNA replication;ko03420//Nucleotide excision repair	GO:0005657//replication fork	GO:0003677//DNA binding;GO:0016462//pyrophosphatase activity;GO:0032559	GO:0006259//DNA metabolic process	gi|336367142|gb|EGN95487.1|/1.01195e-162/hypothetical protein SERLA73DRAFT_60040 [Serpula lacrymans var. lacrymans S7.3]
GME4379_g	EG	0	1	0	0	ko01100//Metabolic pathways;ko04916//Melanogenesis;ko00740//Riboflavin metabolism;ko01110//Biosynthesis of secondary metabolites;ko00350//Tyrosine metabolism	-	-	-	gi|402222906|gb|EJU02971.1|/3.27871e-07/Di-copper centre-containing protein [Dacryopinax sp. DJM-731 SS1]
GME5208_g	EG	0	0.33	0	0	-	-	-	-	gi|392568620|gb|EIW61794.1|/2.40137e-12/hypothetical protein TRAVEDRAFT_44614 [Trametes versicolor FP-101664 SS1]
GME2971_g	EG	0	0.5	0	0	ko00250//Alanine, aspartate and glutamate metabolism;ko00920//Sulfur metabolism;ko01100//Metabolic pathways;ko00270//Cysteine and methionine metabolism;ko00430//Taurine and hypotaurine metabolism;ko01120//Microbial metabolism in diverse environments	-	GO:0048037//cofactor binding;GO:0016740//transferase activity	GO:0019752//carboxylic acid metabolic process	gi|170111842|ref|XP_001887124.1|/1.2726e-180/predicted protein [Laccaria bicolor S238N-H82]
GME6300_g	EG	0	0.33	0	0	ko03040//Spliceosome	-	-	-	gi|336385742|gb|EGO26889.1|/5.03537e-92/hypothetical protein SERLADRAFT_448002 [Serpula lacrymans var. lacrymans S7.9]
GME4664_g	EG	0	0.33	0	0	-	-	-	-	-
GME726_g	EG	0	0.33	0	0	-	-	-	-	gi|299751592|ref|XP_001830368.2|/1.33158e-179/FAD binding domain-containing protein [Coprinopsis cinerea okayama7#130]
GME3052_g	EG	0	1	0	0	ko00260//Glycine, serine and threonine metabolism	-	GO:0016491//oxidoreductase activity;GO:0005488//binding	GO:0016052//carbohydrate catabolic process	gi|51172592|dbj|BAD36748.1|/0/cellobiose dehydrogenase [Irpex lacteus]
GME11128_g	EG	0	0.33	0	0	ko04011//MAPK signaling pathway - yeast;ko04113//Meiosis - yeast	-	-	-	gi|299755145|ref|XP_001828459.2|/1.85735e-07/Ras protein [Coprinopsis cinerea okayama7#130]
GME11088_g	EG	0	0.33	0	0	-	-	-	-	-
GME4566_g	EG	0	0.33	0	0	-	-	-	-	gi|170090444|ref|XP_001876444.1|/1.65122e-13/predicted protein [Laccaria bicolor S238N-H82]
GME9432_g	EG	0	0.33	0	0	-	-	GO:0003824//catalytic activity	GO:0008152//metabolic process	gi|170102977|ref|XP_001882704.1|/9.39428e-22/predicted protein [Laccaria bicolor S238N-H82]
GME3889_g	EG	0	2.34	0	0	-	-	-	-	gi|170113984|ref|XP_001888190.1|/3.16057e-61/predicted protein [Laccaria bicolor S238N-H82]
GME5160_g	EG	0	0.5	0	0	-	-	-	-	gi|403417088|emb|CCM03788.1|/4.68196e-73/predicted protein [Fibroporia radiculosa]
GME12024_g	EG	0	0.33	0	0	-	-	-	-	gi|299738900|ref|XP_001834878.2|/2.00198e-13/hypothetical protein CC1G_09805 [Coprinopsis cinerea okayama7#130]
GME3035_g	EG	0	0.33	0	0	-	-	-	-	gi|299742168|ref|XP_001832297.2|/1.04385e-36/hypothetical protein CC1G_02559 [Coprinopsis cinerea okayama7#130]
GME8189_g	EG	0	0.67	0	0	-	-	-	-	gi|170103344|ref|XP_001882887.1|/2.5527e-49/predicted protein [Laccaria bicolor S238N-H82]
GME9793_g	EG	0	0.33	0	0	ko04011//MAPK signaling pathway - yeast	-	GO:0004871//signal transducer activity	GO:0006351//transcription, DNA-dependent;GO:0007165//signal transduction	gi|395330467|gb|EJF62850.1|/5.63089e-32/hypothetical protein DICSQDRAFT_168522 [Dichomitus squalens LYAD-421 SS1]
GME9360_g	EG	0	0.33	0	0	ko04120//Ubiquitin mediated proteolysis	GO:0044464//cell part	GO:0016879//ligase activity, forming carbon-nitrogen bonds	GO:0043412//macromolecule modification	gi|389738162|gb|EIM79363.1|/0/HECT-domain-containing protein [Stereum hirsutum FP-91666 SS1]
GME5830_g	EG	0	0.5	0	0	-	-	-	-	gi|389744405|gb|EIM85588.1|/1.09837e-103/WD40 repeat-like protein [Stereum hirsutum FP-91666 SS1]
GME4085_g	EG	0	0.5	0	0	ko02010//ABC transporters;ko04976//Bile secretion	-	-	-	gi|299742104|ref|XP_001832249.2|/0/multidrug resistance protein 1 [Coprinopsis cinerea okayama7#130]
GME5937_g	EG	0	0.84	0	0	-	-	-	-	gi|170090454|ref|XP_001876449.1|/6.2303e-112/predicted protein [Laccaria bicolor S238N-H82]
GME4186_g	EG	0	0.67	0	0	-	-	-	-	gi|302687654|ref|XP_003033507.1|/1.6104e-19/expressed protein [Schizophyllum commune H4-8]
GME10703_g	EG	0	0.5	0	0	ko05166//HTLV-I infection;ko04110//Cell cycle;ko04115//p53 signaling pathway;ko04111//Cell cycle - yeast;ko04113//Meiosis - yeast	-	GO:0004672//protein kinase activity;GO:0032559	GO:0006464//cellular protein modification process	gi|336378529|gb|EGO19687.1|/9.98214e-169/hypothetical protein SERLADRAFT_453634 [Serpula lacrymans var. lacrymans S7.9]
GME11709_g	EG	0	0.33	0	0	ko04064//NF-kappa B signaling pathway;ko03410//Base excision repair	-	GO:0003824//catalytic activity	-	gi|302695913|ref|XP_003037635.1|/4.22691e-176/PARP-1-like protein [Schizophyllum commune H4-8]
GME1385_g	EG	0	0.33	0	0	-	-	-	-	gi|170113984|ref|XP_001888190.1|/1.35556e-37/predicted protein [Laccaria bicolor S238N-H82]
GME7093_g	EG	0	0.5	0	0	-	-	-	-	gi|403419883|emb|CCM06583.1|/2.46844e-90/predicted protein [Fibroporia radiculosa]
GME3913_g	EG	0	0.5	0	0	-	-	-	-	gi|393214697|gb|EJD00190.1|/6.50507e-16/hypothetical protein FOMMEDRAFT_159840 [Fomitiporia mediterranea MF3/22]
GME8201_g	EG	0	0.84	0	0	ko03450//Non-homologous end-joining;ko03440//Homologous recombination	-	-	-	gi|299750159|ref|XP_001836574.2|/9.60964e-104/hypothetical protein CC1G_10068 [Coprinopsis cinerea okayama7#130]
GME2003_g	EG	0	0.5	0	0	ko01100//Metabolic pathways;ko00860//Porphyrin and chlorophyll metabolism;ko01110//Biosynthesis of secondary metabolites	-	-	-	gi|390603059|gb|EIN12451.1|/7.93651e-105/NAD(P)-binding protein [Punctularia strigosozonata HHB-11173 SS5]
GME6456_g	EG	0	0.5	0	0	-	-	-	-	gi|390601929|gb|EIN11322.1|/6.48359e-107/hypothetical protein PUNSTDRAFT_50377 [Punctularia strigosozonata HHB-11173 SS5]
GME2434_g	EG	0	0.33	0	0	ko05031//Amphetamine addiction;ko04744//Phototransduction;ko04745//Phototransduction - fly;ko04916//Melanogenesis;ko05152//Tuberculosis;ko04720//Long-term potentiation;ko04020//Calcium signaling pathway;ko04626//Plant-pathogen interaction;ko04270//Vascular smooth muscle contraction;ko05133//Pertussis;ko04971//Gastric acid secretion;ko05214//Glioma;ko04910//Insulin signaling pathway;ko04970//Saliv…	-	GO:0046872//metal ion binding	-	gi|328770436|gb|EGF80478.1|/8.73513e-50/calmodulin [Batrachochytrium dendrobatidis JAM81]
GME10298_g	EG	0	0.84	0	0	ko03010//Ribosome	GO:0005622//intracellular	-	-	gi|302673271|ref|XP_003026322.1|/3.13798e-30/hypothetical protein SCHCODRAFT_79801 [Schizophyllum commune H4-8]
GME10786_g	EG	0	0.84	0	0	-	-	-	-	gi|170109101|ref|XP_001885758.1|/3.68692e-58/predicted protein [Laccaria bicolor S238N-H82]
GME10911_g	EG	0	0.33	0	0	ko00620//Pyruvate metabolism;ko01100//Metabolic pathways;ko00500//Starch and sucrose metabolism	-	GO:0016787//hydrolase activity	-	gi|170111735|ref|XP_001887071.1|/1.38389e-112/glycoside hydrolase family 16 protein [Laccaria bicolor S238N-H82]
GME3938_g	EG	0	0.33	0	0	-	-	-	-	-
GME465_g	EG	0	0.33	0	0	-	-	-	-	gi|170113984|ref|XP_001888190.1|/3.83775e-23/predicted protein [Laccaria bicolor S238N-H82]
GME11_g	EG	0	0.33	0	0	-	-	-	-	gi|170092503|ref|XP_001877473.1|/9.60951e-178/drug:h+ antiporter [Laccaria bicolor S238N-H82]
GME1305_g	EG	0	0.33	0	0	ko01100//Metabolic pathways;ko00624//Polycyclic aromatic hydrocarbon degradation;ko00340//Histidine metabolism;ko00623//Toluene degradation;ko00627//Aminobenzoate degradation;ko00361//Chlorocyclohexane and chlorobenzene degradation;ko00363//Bisphenol degradation;ko00960//Tropane, piperidine and pyridine alkaloid biosynthesis;ko00903//Limonene and pinene degradation;ko00626//Naphthalene degradatio…	-	GO:0004091//carboxylesterase activity	GO:0044238//primary metabolic process	gi|389738128|gb|EIM79332.1|/1.20552e-43/alpha/beta-hydrolase [Stereum hirsutum FP-91666 SS1]
GME5816_g	EG	0	0.5	0	0	ko00190//Oxidative phosphorylation	-	-	-	gi|389751133|gb|EIM92206.1|/4.03749e-95/FAD/NAD-P-binding domain-containing protein [Stereum hirsutum FP-91666 SS1]
GME11960_g	EG	0	0.33	0	0	ko04011//MAPK signaling pathway - yeast;ko04113//Meiosis - yeast	-	GO:0032561//guanyl ribonucleotide binding;GO:0060089	GO:0007166//cell surface receptor signaling pathway	gi|170110496|ref|XP_001886453.1|/3.79244e-164/heterotrimeric G-protein alpha subunit, GPA3-like protein [Laccaria bicolor S238N-H82]
GME7432_g	EG	0	0.33	0	0	-	-	-	-	gi|393220955|gb|EJD06440.1|/1.56416e-66/hypothetical protein FOMMEDRAFT_102223 [Fomitiporia mediterranea MF3/22]
GME7013_g	EG	0	0.5	0	0	-	-	-	-	gi|170113984|ref|XP_001888190.1|/3.94022e-50/predicted protein [Laccaria bicolor S238N-H82]
GME3555_g	EG	0	0.5	0	0	-	-	-	-	-
GME11394_g	EG	0	0.33	0	0	ko03008//Ribosome biogenesis in eukaryotes	-	GO:0004672//protein kinase activity;GO:0032559	GO:0006464//cellular protein modification process	gi|302698039|ref|XP_003038698.1|/4.71563e-163/hypothetical protein SCHCODRAFT_64619 [Schizophyllum commune H4-8]
GME5825_g	EG	0	0.5	0	0	ko00930//Caprolactam degradation;ko01120//Microbial metabolism in diverse environments	-	GO:0050662//coenzyme binding	-	gi|169613494|ref|XP_001800164.1|/0/hypothetical protein SNOG_09878 [Phaeosphaeria nodorum SN15]
GME2785_g	EG	0	0.84	0	0	-	-	-	-	gi|170109346|ref|XP_001885880.1|/3.63411e-47/predicted protein [Laccaria bicolor S238N-H82]
GME3751_g	EG	0	0.33	0	0	ko00030//Pentose phosphate pathway	-	-	-	gi|299742679|ref|XP_001832663.2|/5.46776e-48/sugar kinase [Coprinopsis cinerea okayama7#130]
GME5822_g	EG	0	0.33	0	0	-	-	-	-	-
GME7466_g	EG	0	0.33	0	0	-	-	-	-	-
GME2689_g	EG	0	0.33	0	0	-	-	-	-	gi|336374849|gb|EGO03185.1|/9.52675e-49/hypothetical protein SERLA73DRAFT_174640 [Serpula lacrymans var. lacrymans S7.3]
GME5589_g	EG	0	0.33	0	0	-	-	-	-	gi|302692736|ref|XP_003036047.1|/4.48233e-126/hypothetical protein SCHCODRAFT_81403 [Schizophyllum commune H4-8]
GME9897_g	EG	0	0.84	0	0	ko00680//Methane metabolism	-	-	-	gi|392593884|gb|EIW83209.1|/1.33683e-81/iron hydrogenase [Coniophora puteana RWD-64-598 SS2]
GME11503_g	EG	0	1	0	0	ko01100//Metabolic pathways;ko00240//Pyrimidine metabolism	-	GO:0003824//catalytic activity	GO:0008152//metabolic process	gi|170084103|ref|XP_001873275.1|/1.13252e-86/predicted protein [Laccaria bicolor S238N-H82]
GME7454_g	EG	0	0.67	0	0	-	-	-	-	gi|170115325|ref|XP_001888857.1|/8.53951e-13/predicted protein [Laccaria bicolor S238N-H82]
GME6697_g	EG	0	0.33	0	0	-	-	-	-	gi|358392985|gb|EHK42386.1|/4.96178e-70/hypothetical protein TRIATDRAFT_275866 [Trichoderma atroviride IMI 206040]
GME11350_g	EG	0	1	0	0	ko04310//Wnt signaling pathway;ko03008//Ribosome biogenesis in eukaryotes	-	-	-	gi|336371039|gb|EGN99379.1|/1.43403e-110/hypothetical protein SERLA73DRAFT_182338 [Serpula lacrymans var. lacrymans S7.3]
GME11570_g	EG	0	0.33	0	0	-	-	-	-	gi|170086093|ref|XP_001874270.1|/8.40226e-66/predicted protein [Laccaria bicolor S238N-H82]
GME4829_g	EG	0	0.84	0	0	-	-	-	-	-
GME8948_g	EG	0	1.17	0	0	-	-	-	-	gi|389616328|gb|AFK91528.1|/4.27716e-79/manganese peroxidase 1 [Cerrena unicolor]
GME6242_g	EG	0	0.5	0	0	ko05223//Non-small cell lung cancer;ko05215//Prostate cancer;ko04910//Insulin signaling pathway;ko04960//Aldosterone-regulated sodium reabsorption;ko04510//Focal adhesion;ko03320//PPAR signaling pathway;ko05213//Endometrial cancer;ko04150//mTOR signaling pathway;ko05166//HTLV-I infection;ko04110//Cell cycle;ko04115//p53 signaling pathway;ko04111//Cell cycle - yeast;ko04113//Meiosis - yeast;ko0465…	-	-	-	gi|403416364|emb|CCM03064.1|/3.71482e-39/predicted protein [Fibroporia radiculosa]
GME4810_g	EG	0	0.5	0	0	-	-	-	-	gi|336381317|gb|EGO22469.1|/4.33449e-22/hypothetical protein SERLADRAFT_409958 [Serpula lacrymans var. lacrymans S7.9]
GME9379_g	EG	0	0.5	0	0	-	-	-	-	gi|242218950|ref|XP_002475260.1|/1.2702e-21/predicted protein [Postia placenta Mad-698-R]
GME10440_g	EG	0	0.33	0	0	ko04650//Natural killer cell mediated cytotoxicity;ko04360//Axon guidance;ko04510//Focal adhesion;ko04062//Chemokine signaling pathway;ko04666//Fc gamma R-mediated phagocytosis;ko04010//MAPK signaling pathway;ko05211//Renal cell carcinoma;ko04011//MAPK signaling pathway - yeast;ko04660//T cell receptor signaling pathway;ko04810//Regulation of actin cytoskeleton;ko05120//Epithelial cell signaling …	-	-	-	gi|336383317|gb|EGO24466.1|/4.05783e-82/hypothetical protein SERLADRAFT_408420 [Serpula lacrymans var. lacrymans S7.9]
GME54_g	EG	0	0.33	0	0	-	-	-	-	-
GME10676_g	EG	0	0.5	0	0	-	-	-	-	gi|392592213|gb|EIW81540.1|/2.38652e-06/hypothetical protein CONPUDRAFT_104945 [Coniophora puteana RWD-64-598 SS2]
GME4487_g	EG	0	0.33	0	0	-	-	-	-	-
GME10309_g	EG	0	0.33	0	0	-	-	-	-	gi|170109992|ref|XP_001886202.1|/6.21938e-11/predicted protein [Laccaria bicolor S238N-H82]
GME447_g	EG	0	0.33	0	0	-	-	-	-	-
GME5862_g	EG	0	0.33	0	0	ko03460//Fanconi anemia pathway	-	-	-	gi|395323597|gb|EJF56062.1|/2.51906e-29/hypothetical protein DICSQDRAFT_113505 [Dichomitus squalens LYAD-421 SS1]
GME3108_g	EG	0	0.5	0	0	-	-	-	-	gi|336375484|gb|EGO03820.1|/2.14285e-10/hypothetical protein SERLA73DRAFT_158298 [Serpula lacrymans var. lacrymans S7.3]
GME11161_g	EG	0	0.5	0	0	ko04146//Peroxisome	-	-	GO:0006810//transport	gi|170099704|ref|XP_001881070.1|/0/predicted protein [Laccaria bicolor S238N-H82]
GME7265_g	EG	0	0.67	0	0	-	-	-	-	-
GME10238_g	EG	0	0.33	0	0	-	-	-	-	gi|238575941|ref|XP_002387852.1|/1.60873e-18/hypothetical protein MPER_13205 [Moniliophthora perniciosa FA553]
GME3998_g	EG	0	0.33	0	0	-	-	-	-	gi|390602064|gb|EIN11457.1|/4.60322e-29/hypothetical protein PUNSTDRAFT_131623 [Punctularia strigosozonata HHB-11173 SS5]
GME7599_g	EG	0	1.51	0	0	ko00930//Caprolactam degradation;ko01120//Microbial metabolism in diverse environments	-	-	-	gi|170093614|ref|XP_001878028.1|/9.34432e-126/predicted protein [Laccaria bicolor S238N-H82]
GME4696_g	EG	0	0.33	0	0	-	-	-	-	-
GME5240_g	EG	0	0.33	0	0	ko03460//Fanconi anemia pathway	-	-	-	gi|299748040|ref|XP_001837417.2|/3.84316e-168/hypothetical protein CC1G_01329 [Coprinopsis cinerea okayama7#130]
GME769_g	EG	0	0.33	0	0	ko00760//Nicotinate and nicotinamide metabolism	-	-	-	gi|299751646|ref|XP_001830399.2|/2.03222e-16/hypothetical protein CC1G_02035 [Coprinopsis cinerea okayama7#130]
GME10049_g	EG	0	0.33	0	0	-	-	GO:0046914//transition metal ion binding;GO:0003676//nucleic acid binding;GO:0003824//catalytic activity	GO:0006259//DNA metabolic process	gi|336371568|gb|EGN99907.1|/9.72506e-21/hypothetical protein SERLA73DRAFT_72683 [Serpula lacrymans var. lacrymans S7.3]
GME151_g	EG	0	0.5	0	0	-	-	-	-	gi|393236256|gb|EJD43806.1|/5.1199e-31/hypothetical protein AURDEDRAFT_114585 [Auricularia delicata TFB-10046 SS5]
GME11100_g	EG	0	1.17	0	0	-	-	-	-	gi|392586388|gb|EIW75725.1|/7.15612e-46/NAD(P)-binding protein [Coniophora puteana RWD-64-598 SS2]
GME10315_g	EG	0	0.33	0	0	-	-	-	-	gi|390605211|gb|EIN14602.1|/4.48624e-06/hypothetical protein PUNSTDRAFT_130227 [Punctularia strigosozonata HHB-11173 SS5]
GME499_g	EG	0	0.33	0	0	-	-	-	-	gi|392590076|gb|EIW79406.1|/1.26989e-12/hypothetical protein CONPUDRAFT_145444 [Coniophora puteana RWD-64-598 SS2]
GME9437_g	EG	0	0.84	0	0	-	-	-	-	-
GME8149_g	EG	0	0.33	0	0	-	-	-	-	-
GME7708_g	EG	0	0.33	0	0	-	-	-	-	gi|170094624|ref|XP_001878533.1|/2.07028e-57/predicted protein [Laccaria bicolor S238N-H82]
GME8764_g	EG	0	0.5	0	0	ko04110//Cell cycle;ko04111//Cell cycle - yeast;ko04113//Meiosis - yeast	-	GO:0004721//phosphoprotein phosphatase activity	GO:0006796//phosphate-containing compound metabolic process;GO:0006464//cellular protein modification process	gi|403418956|emb|CCM05656.1|/0/predicted protein [Fibroporia radiculosa]
GME300_g	EG	0	0.5	0	0	-	-	-	-	gi|170087756|ref|XP_001875101.1|/1.55889e-11/hypothetical proline-rich protein [Laccaria bicolor S238N-H82]
GME3701_g	EG	0	0.84	0	0	-	-	-	-	-
GME1777_g	EG	0	0.5	0	0	-	-	-	-	gi|336389863|gb|EGO31006.1|/1.75821e-62/hypothetical protein SERLADRAFT_412493 [Serpula lacrymans var. lacrymans S7.9]
GME7102_g	EG	0	0.33	0	0	-	-	-	-	gi|299755179|ref|XP_001828482.2|/1.69636e-44/NWD2 [Coprinopsis cinerea okayama7#130]
GME3427_g	EG	0	0.67	0	0	-	-	-	-	gi|392567783|gb|EIW60958.1|/9.14031e-90/hypothetical protein TRAVEDRAFT_64243 [Trametes versicolor FP-101664 SS1]
GME3150_g	EG	0	0.67	0	0	-	-	-	-	gi|46395300|dbj|BAD16581.1|/1.39011e-34/lectin [Pleurotus cornucopiae]
GME9534_g	EG	0	2.51	0	0	-	-	-	-	gi|299756355|ref|XP_001829276.2|/4.76234e-65/hypothetical protein CC1G_06613 [Coprinopsis cinerea okayama7#130]
GME7323_g	EG	0	0.33	0	0	-	-	-	GO:0006810//transport	gi|336388057|gb|EGO29201.1|/1.79334e-141/hypothetical protein SERLADRAFT_412793 [Serpula lacrymans var. lacrymans S7.9]
GME11590_g	EG	0	0.33	0	0	-	-	-	-	gi|170084839|ref|XP_001873643.1|/2.36285e-87/predicted protein [Laccaria bicolor S238N-H82]
GME750_g	EG	0	0.33	0	0	ko01100//Metabolic pathways;ko00860//Porphyrin and chlorophyll metabolism;ko01110//Biosynthesis of secondary metabolites	-	-	-	gi|390598664|gb|EIN08062.1|/6.41228e-41/NAD(P)-binding protein [Punctularia strigosozonata HHB-11173 SS5]
GME6347_g	EG	0	0.33	0	0	-	-	-	-	gi|170109101|ref|XP_001885758.1|/5.88931e-52/predicted protein [Laccaria bicolor S238N-H82]
GME1146_g	EG	0	0.33	0	0	-	-	-	-	gi|170114193|ref|XP_001888294.1|/3.67119e-61/predicted protein [Laccaria bicolor S238N-H82]
GME2106_g	EG	0	0.67	0	0	ko00620//Pyruvate metabolism;ko01100//Metabolic pathways;ko00710//Carbon fixation in photosynthetic organisms;ko03320//PPAR signaling pathway;ko01120//Microbial metabolism in diverse environments	-	GO:0016615//malate dehydrogenase activity;GO:0000166//nucleotide binding;GO:0043169//cation binding	GO:0043648//dicarboxylic acid metabolic process	gi|299743333|ref|XP_001835695.2|/0/malate dehydrogenase [Coprinopsis cinerea okayama7#130]
GME11527_g	EG	0	0.5	0	0	-	-	-	-	-
GME2198_g	EG	0	0.33	0	0	-	-	-	-	gi|299743180|ref|XP_002910634.1|/2.08385e-61/hypothetical protein CC1G_14965 [Coprinopsis cinerea okayama7#130]
GME10976_g	EG	0	1.34	0	0	-	-	-	-	gi|238576944|ref|XP_002388219.1|/2.45607e-53/hypothetical protein MPER_12790 [Moniliophthora perniciosa FA553]
GME5414_g	EG	0	0.67	0	0	-	-	-	-	gi|390597823|gb|EIN07222.1|/6.01015e-57/hypothetical protein PUNSTDRAFT_53598 [Punctularia strigosozonata HHB-11173 SS5]
GME6280_g	EG	0	0.84	0	0	-	-	-	-	gi|336368413|gb|EGN96756.1|/4.49606e-24/hypothetical protein SERLA73DRAFT_161770 [Serpula lacrymans var. lacrymans S7.3]
GME6053_g	EG	0	0.67	0	0	ko00260//Glycine, serine and threonine metabolism	-	-	-	gi|395328165|gb|EJF60559.1|/4.43019e-146/alcohol oxidase [Dichomitus squalens LYAD-421 SS1]
GME4163_g	EG	0	0.33	0	0	ko04011//MAPK signaling pathway - yeast	-	-	-	gi|170087774|ref|XP_001875110.1|/0/predicted protein [Laccaria bicolor S238N-H82]
GME3723_g	EG	0	0.33	0	0	-	GO:0043229//intracellular organelle	-	GO:0007049//cell cycle	gi|170093257|ref|XP_001877850.1|/2.5049e-50/predicted protein [Laccaria bicolor S238N-H82]
GME6090_g	EG	0	0.67	0	0	-	-	-	-	gi|403412696|emb|CCL99396.1|/1.51905e-07/predicted protein [Fibroporia radiculosa]
GME9927_g	EG	0	0.5	0	0	-	-	GO:0003824//catalytic activity	-	gi|170092321|ref|XP_001877382.1|/0/predicted protein [Laccaria bicolor S238N-H82]
GME10881_g	EG	0	0.33	0	0	-	-	-	-	gi|170109101|ref|XP_001885758.1|/1.01962e-59/predicted protein [Laccaria bicolor S238N-H82]
GME7844_g	EG	0	0.33	0	0	ko03040//Spliceosome	-	-	-	gi|395333536|gb|EJF65913.1|/2.79236e-23/hypothetical protein DICSQDRAFT_151944 [Dichomitus squalens LYAD-421 SS1]
GME7056_g	EG	0	0.33	0	0	ko01100//Metabolic pathways;ko00730//Thiamine metabolism	-	-	-	gi|169853380|ref|XP_001833370.1|/1.50269e-123/nudix hydrolase 20 [Coprinopsis cinerea okayama7#130]
GME9327_g	EG	0	0.33	0	0	ko04614//Renin-angiotensin system;ko04142//Lysosome	-	-	-	gi|390604927|gb|EIN14318.1|/7.62362e-150/serine carboxypeptidase [Punctularia strigosozonata HHB-11173 SS5]
GME3107_g	EG	0	0.33	0	0	-	-	-	-	-
GME6675_g	EG	0	0.33	0	0	-	-	-	-	gi|392565248|gb|EIW58425.1|/1.02793e-26/hypothetical protein TRAVEDRAFT_148564, partial [Trametes versicolor FP-101664 SS1]
GME3823_g	EG	0	0.33	0	0	-	-	GO:0070011	GO:0008152//metabolic process	gi|169866011|ref|XP_001839599.1|/2.64601e-121/serine protease [Coprinopsis cinerea okayama7#130]
GME6742_g	EG	0	0.33	0	0	-	-	-	-	-
GME11157_g	EG	0	0.33	0	0	ko01100//Metabolic pathways;ko00310//Lysine degradation;ko00780//Biotin metabolism	-	-	-	gi|302675859|ref|XP_003027613.1|/0/hypothetical protein SCHCODRAFT_70703 [Schizophyllum commune H4-8]
GME2469_g	EL	0	0	0.33	0	-	-	-	-	gi|170116445|ref|XP_001889413.1|/0/predicted protein [Laccaria bicolor S238N-H82]
GME460_g	EL	0	0	0.33	0	-	-	-	-	gi|392567562|gb|EIW60737.1|/3.11549e-10/hypothetical protein TRAVEDRAFT_71040 [Trametes versicolor FP-101664 SS1]
GME11913_g	EL	0	0	0.33	0	-	-	-	-	gi|336375555|gb|EGO03891.1|/6.56318e-12/hypothetical protein SERLA73DRAFT_84078 [Serpula lacrymans var. lacrymans S7.3]
GME8401_g	EL	0	0	0.33	0	-	-	-	-	gi|403418866|emb|CCM05566.1|/4.49618e-21/predicted protein [Fibroporia radiculosa]
GME459_g	EL	0	0	0.33	0	-	-	-	-	gi|392558490|gb|EIW51678.1|/2.05036e-61/hypothetical protein TRAVEDRAFT_157292 [Trametes versicolor FP-101664 SS1]
GME6590_g	EL	0	0	0.84	0	-	-	-	-	-
GME4838_g	EL	0	0	0.33	0	ko04111//Cell cycle - yeast	-	-	-	gi|169848016|ref|XP_001830716.1|/3.79337e-116/hypothetical protein CC1G_03253 [Coprinopsis cinerea okayama7#130]
GME3837_g	EL	0	0	0.33	0	-	-	-	-	gi|336370988|gb|EGN99328.1|/5.73736e-127/hypothetical protein SERLA73DRAFT_90677 [Serpula lacrymans var. lacrymans S7.3]
GME6966_g	EL	0	0	1.17	0	-	-	-	-	-
GME3895_g	EL	0	0	0.33	0	ko01100//Metabolic pathways;ko00520//Amino sugar and nucleotide sugar metabolism;ko00500//Starch and sucrose metabolism;ko01110//Biosynthesis of secondary metabolites	-	GO:0003824//catalytic activity	-	gi|398258456|gb|AFO72235.1|/8.61594e-105/glycoside hydrolase family 61 protein F [Heterobasidion parviporum]
GME2937_g	EL	0	0	0.33	0	-	-	GO:0016491//oxidoreductase activity;GO:0005488//binding	-	gi|170111334|ref|XP_001886871.1|/4.72354e-79/predicted protein [Laccaria bicolor S238N-H82]
GME4898_g	EL	0	0	0.5	0	-	-	-	-	gi|336368413|gb|EGN96756.1|/3.23151e-10/hypothetical protein SERLA73DRAFT_161770 [Serpula lacrymans var. lacrymans S7.3]
GME4218_g	EL	0	0	1.51	0	-	GO:0044464//cell part	GO:0046914//transition metal ion binding	-	gi|170086702|ref|XP_001874574.1|/3.16885e-88/Zn finger family DNA binding protein [Laccaria bicolor S238N-H82]
GME2044_g	EL	0	0	0.33	0	-	-	-	-	gi|392559253|gb|EIW52438.1|/2.33233e-109/hypothetical protein TRAVEDRAFT_156213 [Trametes versicolor FP-101664 SS1]
GME2950_g	EL	0	0	0.33	0	-	-	-	-	gi|170103987|ref|XP_001883208.1|/8.45829e-56/predicted protein [Laccaria bicolor S238N-H82]
GME7698_g	EL	0	0	1	0	ko04260//Cardiac muscle contraction;ko04961//Endocrine and other factor-regulated calcium reabsorption;ko04970//Salivary secretion;ko04974//Protein digestion and absorption;ko04960//Aldosterone-regulated sodium reabsorption;ko04972//Pancreatic secretion;ko04978//Mineral absorption;ko04964//Proximal tubule bicarbonate reclamation;ko04976//Bile secretion;ko00190//Oxidative phosphorylation;ko04971//…	GO:0016020//membrane	GO:0016820//hydrolase activity, acting on acid anhydrides, catalyzing transmembrane movement of substances;GO:0000166//nucleotide binding	GO:0006811//ion transport;GO:0008152//metabolic process	gi|392567761|gb|EIW60936.1|/0/aminophospholipid-transporting P-type ATPase [Trametes versicolor FP-101664 SS1]
GME11436_g	EL	0	0	0.67	0	-	-	-	-	gi|170084033|ref|XP_001873240.1|/7.02946e-48/predicted protein [Laccaria bicolor S238N-H82]
GME1096_g	EL	0	0	0.33	0	-	-	-	-	gi|169865581|ref|XP_001839389.1|/3.6755e-102/hypothetical protein CC1G_11089 [Coprinopsis cinerea okayama7#130]
GME2985_g	EL	0	0	0.5	0	-	-	-	-	gi|238582519|ref|XP_002389957.1|/1.94492e-25/hypothetical protein MPER_10847 [Moniliophthora perniciosa FA553]
GME7400_g	EL	0	0	0.33	0	-	-	-	-	gi|380495283|emb|CCF32515.1|/3.00134e-41/NWD2 protein [Colletotrichum higginsianum]
GME4978_g	EL	0	0	0.33	0	-	-	-	-	gi|170097047|ref|XP_001879743.1|/2.83702e-43/predicted protein [Laccaria bicolor S238N-H82]
GME7203_g	EL	0	0	0.5	0	ko00643//Styrene degradation;ko00460//Cyanoamino acid metabolism;ko00360//Phenylalanine metabolism;ko00330//Arginine and proline metabolism;ko00627//Aminobenzoate degradation;ko00380//Tryptophan metabolism;ko01120//Microbial metabolism in diverse environments;ko01100//Metabolic pathways;ko00624//Polycyclic aromatic hydrocarbon degradation;ko00340//Histidine metabolism;ko00623//Toluene degradation…	-	-	-	gi|390599745|gb|EIN09141.1|/0/MFS general substrate transporter [Punctularia strigosozonata HHB-11173 SS5]
GME419_g	EL	0	0	0.33	0	-	-	-	-	gi|119482455|ref|XP_001261256.1|/1.23487e-47/hypothetical protein NFIA_093220 [Neosartorya fischeri NRRL 181]
GME6434_g	EL	0	0	0.33	0	ko01100//Metabolic pathways;ko00860//Porphyrin and chlorophyll metabolism;ko01110//Biosynthesis of secondary metabolites	-	-	-	gi|392564116|gb|EIW57294.1|/8.49004e-126/DUF185-domain-containing protein [Trametes versicolor FP-101664 SS1]
GME11166_g	EL	0	0	0.33	0	ko01100//Metabolic pathways;ko01110//Biosynthesis of secondary metabolites;ko00620//Pyruvate metabolism;ko00650//Butanoate metabolism;ko00010//Glycolysis / Gluconeogenesis;ko00290//Valine, leucine and isoleucine biosynthesis;ko00020//Citrate cycle (TCA cycle);ko01120//Microbial metabolism in diverse environments	-	GO:0003824//catalytic activity	GO:0008152//metabolic process	gi|170115021|ref|XP_001888706.1|/3.13543e-16/predicted protein [Laccaria bicolor S238N-H82]
GME2189_g	EL	0	0	0.33	0	-	-	-	-	gi|12862434|dbj|BAB32470.1|/6.33973e-110/Pol-like protein Pol-2 [Tricholoma matsutake]
GME6118_g	EL	0	0	0.5	0	-	-	-	-	-
GME7465_g	EL	0	0	0.5	0	-	-	-	-	-
GME235_g	EL	0	0	0.5	0	-	-	-	-	gi|299740273|ref|XP_002910302.1|/1.03596e-10/hypothetical protein CC1G_15731 [Coprinopsis cinerea okayama7#130]
GME6753_g	EL	0	0	0.5	0	-	-	-	-	gi|169846226|ref|XP_001829829.1|/7.84886e-12/hypothetical protein CC1G_06038 [Coprinopsis cinerea okayama7#130]
GME3522_g	EL	0	0	0.33	0	-	-	-	-	gi|170089783|ref|XP_001876114.1|/4.74899e-94/predicted protein [Laccaria bicolor S238N-H82]
GME2259_g	EL	0	0	0.5	0	-	-	-	-	-
GME11750_g	EL	0	0	1	0	ko03430//Mismatch repair;ko00970//Aminoacyl-tRNA biosynthesis	-	-	-	gi|392593379|gb|EIW82704.1|/3.88492e-54/protein kinase subdomain-containing protein PKL CAK Fmp29 [Coniophora puteana RWD-64-598 SS2]
GME8573_g	EL	0	0	0.33	0	ko04110//Cell cycle;ko05169//Epstein-Barr virus infection;ko05130//Pathogenic Escherichia coli infection;ko04722//Neurotrophin signaling pathway;ko04114//Oocyte meiosis	-	-	-	gi|336386761|gb|EGO27907.1|/5.42071e-80/hypothetical protein SERLADRAFT_435677 [Serpula lacrymans var. lacrymans S7.9]
GME1254_g	EL	0	0	0.33	0	-	-	-	-	gi|170099886|ref|XP_001881161.1|/9.95963e-19/predicted protein [Laccaria bicolor S238N-H82]
GME7168_g	EL	0	0	0.33	0	ko01100//Metabolic pathways;ko00052//Galactose metabolism;ko00561//Glycerolipid metabolism;ko00600//Sphingolipid metabolism;ko01110//Biosynthesis of secondary metabolites;ko00240//Pyrimidine metabolism;ko00460//Cyanoamino acid metabolism;ko00500//Starch and sucrose metabolism;ko00511//Other glycan degradation	-	GO:0046914//transition metal ion binding;GO:0015923//mannosidase activity	GO:0019318//hexose metabolic process	gi|170099910|ref|XP_001881173.1|/8.57336e-125/glycoside hydrolase family 38 protein [Laccaria bicolor S238N-H82]
GME2913_g	EL	0	0	0.33	0	-	-	-	-	gi|403412179|emb|CCL98879.1|/2.46486e-54/predicted protein [Fibroporia radiculosa]
GME786_g	EL	0	0	0.5	0	-	-	-	-	gi|395327226|gb|EJF59627.1|/4.02339e-09/hypothetical protein DICSQDRAFT_64674 [Dichomitus squalens LYAD-421 SS1]
GME6791_g	EL	0	0	0.33	0	-	-	-	-	-
GME11339_g	EL	0	0	0.67	0	ko05016//Huntington's disease;ko01100//Metabolic pathways;ko00190//Oxidative phosphorylation;ko05010//Alzheimer's disease;ko05012//Parkinson's disease	-	-	-	gi|242209999|ref|XP_002470844.1|/5.98729e-29/hypothetical ubiquinone oxidoreductase 20 kD subunit [Postia placenta Mad-698-R]
GME2231_g	EL	0	0	0.67	0	-	-	-	-	gi|302689907|ref|XP_003034633.1|/4.30725e-30/hypothetical protein SCHCODRAFT_107292 [Schizophyllum commune H4-8]
GME6159_g	EL	0	0	1.84	0	-	-	-	-	gi|170095779|ref|XP_001879110.1|/3.19005e-168/predicted protein [Laccaria bicolor S238N-H82]
GME7806_g	EL	0	0	0.33	0	-	-	-	-	gi|403412534|emb|CCL99234.1|/2.08564e-42/predicted protein [Fibroporia radiculosa]
GME7614_g	EL	0	0	0.33	0	-	-	-	-	gi|170093588|ref|XP_001878015.1|/8.63657e-65/MFS DHA1 amino acid exporter [Laccaria bicolor S238N-H82]
GME2275_g	EL	0	0	0.33	0	-	-	-	-	gi|170097423|ref|XP_001879931.1|/9.13578e-40/predicted protein [Laccaria bicolor S238N-H82]
GME10346_g	EL	0	0	0.33	0	-	-	-	-	-
GME11717_g	EL	0	0	0.33	0	ko01100//Metabolic pathways;ko03440//Homologous recombination;ko00520//Amino sugar and nucleotide sugar metabolism;ko00051//Fructose and mannose metabolism;ko00500//Starch and sucrose metabolism;ko01120//Microbial metabolism in diverse environments;ko00260//Glycine, serine and threonine metabolism	-	GO:0016772//transferase activity, transferring phosphorus-containing groups;GO:0000166//nucleotide binding	GO:0006566//threonine metabolic process	gi|390604049|gb|EIN13440.1|/2.64468e-141/homoserine kinase [Punctularia strigosozonata HHB-11173 SS5]
GME3365_g	EL	0	0	0.33	0	-	-	-	-	gi|170115214|ref|XP_001888802.1|/5.04584e-15/predicted protein [Laccaria bicolor S238N-H82]
GME10104_g	EL	0	0	0.33	0	-	-	-	-	-
GME1894_g	EL	0	0	0.33	0	-	-	-	-	-
GME4463_g	EL	0	0	1	0	ko04011//MAPK signaling pathway - yeast	-	-	-	gi|170109988|ref|XP_001886200.1|/1.73878e-94/STE12-like C2H2 type Zn-finger transcription factor [Laccaria bicolor S238N-H82]
GME3724_g	EL	0	0	0.67	0	-	-	-	-	gi|392590076|gb|EIW79406.1|/2.40704e-12/hypothetical protein CONPUDRAFT_145444 [Coniophora puteana RWD-64-598 SS2]
GME6057_g	EL	0	0	0.5	0	ko00624//Polycyclic aromatic hydrocarbon degradation;ko01100//Metabolic pathways;ko00627//Aminobenzoate degradation;ko00363//Bisphenol degradation;ko01110//Biosynthesis of secondary metabolites;ko00903//Limonene and pinene degradation;ko00945//Stilbenoid, diarylheptanoid and gingerol biosynthesis;ko01120//Microbial metabolism in diverse environments;ko01100//Metabolic pathways;ko00360//Phenylalan…	-	-	-	gi|354961625|dbj|BAL05080.1|/7.12665e-99/cytochrome P450 [Phanerochaete chrysosporium]
GME454_g	EL	0	0	0.33	0	-	-	-	-	gi|170117053|ref|XP_001889715.1|/6.71805e-31/predicted protein [Laccaria bicolor S238N-H82]
GME4568_g	EL	0	0	0.33	0	-	-	-	-	gi|393236132|gb|EJD43683.1|/1.32304e-47/cysteine proteinase [Auricularia delicata TFB-10046 SS5]
GME11508_g	EL	0	0	0.33	0	-	-	-	-	gi|170085325|ref|XP_001873886.1|/1.19734e-60/predicted protein [Laccaria bicolor S238N-H82]
GME9124_g	EL	0	0	0.33	0	-	-	-	-	gi|170085999|ref|XP_001874223.1|/6.35988e-38/predicted protein [Laccaria bicolor S238N-H82]
GME8382_g	EL	0	0	0.33	0	ko01100//Metabolic pathways;ko00540//Lipopolysaccharide biosynthesis;ko01110//Biosynthesis of secondary metabolites;ko00460//Cyanoamino acid metabolism;ko03010//Ribosome;ko00940//Phenylpropanoid biosynthesis;ko00500//Starch and sucrose metabolism;ko00511//Other glycan degradation;ko00970//Aminoacyl-tRNA biosynthesis	-	GO:0016798//hydrolase activity, acting on glycosyl bonds	GO:0044238//primary metabolic process	gi|336386484|gb|EGO27630.1|/0/glycoside hydrolase family 3 protein [Serpula lacrymans var. lacrymans S7.9]
GME4378_g	EL	0	0	0.33	0	ko04111//Cell cycle - yeast	-	GO:0005488//binding	-	gi|392565556|gb|EIW58733.1|/4.2469e-124/hypothetical protein TRAVEDRAFT_58870 [Trametes versicolor FP-101664 SS1]
GME3940_g	EL	0	0	0.5	0	-	-	-	-	gi|169855683|ref|XP_001834508.1|/4.25774e-108/cytochrome P450 monooxygenase pc-1 [Coprinopsis cinerea okayama7#130]
GME6149_g	EL	0	0	0.33	0	-	-	-	-	gi|336372995|gb|EGO01334.1|/2.21966e-115/hypothetical protein SERLA73DRAFT_179497 [Serpula lacrymans var. lacrymans S7.3]
GME9357_g	EL	0	0	0.5	0	-	-	-	-	-
GME1083_g	EL	0	0	0.33	0	-	-	-	-	-
GME1369_g	EL	0	0	0.33	0	-	-	-	-	gi|395326394|gb|EJF58804.1|/0/hypothetical protein DICSQDRAFT_172627 [Dichomitus squalens LYAD-421 SS1]
GME3292_g	EL	0	0	0.33	0	-	-	-	-	gi|390599090|gb|EIN08487.1|/2.82932e-07/hypothetical protein PUNSTDRAFT_120822 [Punctularia strigosozonata HHB-11173 SS5]
GME10159_g	EL	0	0	0.67	0	-	-	-	-	gi|170103871|ref|XP_001883150.1|/1.09426e-63/predicted protein [Laccaria bicolor S238N-H82]
GME6729_g	EL	0	0	0.5	0	-	-	-	-	-
GME391_g	EL	0	0	0.33	0	ko03040//Spliceosome	-	-	-	gi|170093365|ref|XP_001877904.1|/4.06511e-31/predicted protein [Laccaria bicolor S238N-H82]
GME5004_g	EL	0	0	0.5	0	-	-	-	-	gi|170099437|ref|XP_001880937.1|/6.24437e-43/predicted protein [Laccaria bicolor S238N-H82]
GME3738_g	EL	0	0	0.33	0	-	-	-	-	gi|392591950|gb|EIW81277.1|/5.21468e-13/hypothetical protein CONPUDRAFT_73051 [Coniophora puteana RWD-64-598 SS2]
GME2671_g	EL	0	0	0.5	0	-	-	-	-	gi|390595079|gb|EIN04486.1|/1.9238e-22/hypothetical protein PUNSTDRAFT_76415, partial [Punctularia strigosozonata HHB-11173 SS5]
GME10577_g	EL	0	0	0.33	0	-	-	-	-	-
GME707_g	EL	0	0	0.33	0	-	-	-	-	gi|170098328|ref|XP_001880383.1|/6.94357e-25/predicted protein [Laccaria bicolor S238N-H82]
GME9125_g	EL	0	0	0.33	0	-	-	-	-	gi|170103344|ref|XP_001882887.1|/2.07627e-46/predicted protein [Laccaria bicolor S238N-H82]
GME7342_g	EL	0	0	0.5	0	-	-	-	-	gi|170112350|ref|XP_001887377.1|/5.60249e-52/predicted protein [Laccaria bicolor S238N-H82]
GME1878_g	EL	0	0	0.67	0	-	-	-	-	-
GME1309_g	EL	0	0	0.33	0	-	-	-	-	-
GME3737_g	EL	0	0	0.33	0	-	-	-	-	gi|336369730|gb|EGN98071.1|/9.62042e-09/hypothetical protein SERLA73DRAFT_153261 [Serpula lacrymans var. lacrymans S7.3]
GME3202_g	EL	0	0	0.5	0	-	-	-	-	-
GME10371_g	EL	0	0	0.5	0	ko04113//Meiosis - yeast	-	-	-	gi|336365326|gb|EGN93677.1|/2.58942e-82/hypothetical protein SERLA73DRAFT_97615 [Serpula lacrymans var. lacrymans S7.3]
GME856_g	EL	0	0	0.33	0	-	-	-	-	gi|170098282|ref|XP_001880360.1|/2.86468e-105/predicted protein [Laccaria bicolor S238N-H82]
GME6205_g	EL	0	0	0.33	0	-	-	-	-	-
GME9443_g	EL	0	0	0.33	0	-	-	-	-	gi|392563008|gb|EIW56188.1|/0/hypothetical protein TRAVEDRAFT_129575 [Trametes versicolor FP-101664 SS1]
GME6983_g	EL	0	0	0.5	0	ko00624//Polycyclic aromatic hydrocarbon degradation;ko01100//Metabolic pathways;ko00627//Aminobenzoate degradation;ko00363//Bisphenol degradation;ko01110//Biosynthesis of secondary metabolites;ko00903//Limonene and pinene degradation;ko00945//Stilbenoid, diarylheptanoid and gingerol biosynthesis;ko01120//Microbial metabolism in diverse environments;ko00071//Fatty acid metabolism;ko00627//Aminobe…	-	GO:0016491//oxidoreductase activity;GO:0005506//iron ion binding	GO:0008152//metabolic process	gi|170090332|ref|XP_001876388.1|/0/predicted protein [Laccaria bicolor S238N-H82]
GME3179_g	EL	0	0	0.67	0	-	-	-	-	-
GME5163_g	EL	0	0	0.84	0	-	-	-	-	gi|389751059|gb|EIM92132.1|/2.33691e-10/hypothetical protein STEHIDRAFT_143574 [Stereum hirsutum FP-91666 SS1]
GME4052_g	EL	0	0	0.84	0	-	-	-	-	gi|392559416|gb|EIW52600.1|/5.34843e-09/hypothetical protein TRAVEDRAFT_83408, partial [Trametes versicolor FP-101664 SS1]
GME1600_g	EL	0	0	1.17	0	-	-	-	-	gi|170099870|ref|XP_001881153.1|/8.84797e-26/predicted protein [Laccaria bicolor S238N-H82]
GME1501_g	EL	0	0	1.34	0	-	-	-	-	gi|170095938|ref|XP_001879189.1|/5.07374e-42/predicted protein [Laccaria bicolor S238N-H82]
GME9980_g	EL	0	0	0.33	0	-	-	-	-	gi|302679636|ref|XP_003029500.1|/5.36068e-77/hypothetical protein SCHCODRAFT_258088 [Schizophyllum commune H4-8]
GME570_g	EL	0	0	0.33	0	-	-	-	-	-
GME6801_g	EL	0	0	0.33	0	-	-	-	-	gi|169846362|ref|XP_001829896.1|/7.96025e-71/hypothetical protein CC1G_04585 [Coprinopsis cinerea okayama7#130]
GME2789_g	EL	0	0	0.5	0	-	-	-	-	-
GME10241_g	EL	0	0	0.33	0	-	-	-	-	gi|170108280|ref|XP_001885349.1|/1.05858e-35/GTPase activating rab protein [Laccaria bicolor S238N-H82]
GME3070_g	EL	0	0	0.33	0	ko03040//Spliceosome;ko03018//RNA degradation	-	-	-	gi|169851696|ref|XP_001832537.1|/1.23584e-29/hypothetical protein CC1G_03551 [Coprinopsis cinerea okayama7#130]
GME9459_g	EL	0	0	0.33	0	-	-	-	-	gi|299756319|ref|XP_001829247.2|/1.78764e-176/Sel1 domain-containing protein [Coprinopsis cinerea okayama7#130]
GME6609_g	EL	0	0	0.33	0	ko04011//MAPK signaling pathway - yeast	-	-	-	gi|402222511|gb|EJU02577.1|/8.19889e-12/hypothetical protein DACRYDRAFT_78409 [Dacryopinax sp. DJM-731 SS1]
GME4851_g	EL	0	0	0.33	0	ko02010//ABC transporters;ko04976//Bile secretion	-	GO:0017111//nucleoside-triphosphatase activity;GO:0000166//nucleotide binding	GO:0009987//cellular process;GO:0006810//transport	gi|170089911|ref|XP_001876178.1|/0/predicted protein [Laccaria bicolor S238N-H82]
GME983_g	EL	0	0	0.33	0	-	-	-	-	gi|170092621|ref|XP_001877532.1|/9.57501e-126/predicted protein [Laccaria bicolor S238N-H82]
GME1633_g	EL	0	0	0.33	0	-	-	-	-	-
GME5210_g	EL	0	0	0.5	0	ko05016//Huntington's disease;ko04961//Endocrine and other factor-regulated calcium reabsorption;ko04721//Synaptic vesicle cycle;ko04144//Endocytosis	GO:0005905//coated pit;GO:0030119//AP-type membrane coat adaptor complex	-	GO:0015031//protein transport	gi|336367329|gb|EGN95674.1|/0/hypothetical protein SERLA73DRAFT_186833 [Serpula lacrymans var. lacrymans S7.3]
GME11466_g	EL	0	0	0.33	0	ko04146//Peroxisome;ko01100//Metabolic pathways;ko00071//Fatty acid metabolism;ko03010//Ribosome;ko04920//Adipocytokine signaling pathway;ko03320//PPAR signaling pathway;ko01100//Metabolic pathways;ko00360//Phenylalanine metabolism;ko00940//Phenylpropanoid biosynthesis;ko01110//Biosynthesis of secondary metabolites;ko00130//Ubiquinone and other terpenoid-quinone biosynthesis	-	GO:0003824//catalytic activity	-	gi|170084069|ref|XP_001873258.1|/0/predicted protein [Laccaria bicolor S238N-H82]
GME4016_g	EL	0	0	0.33	0	-	-	-	-	gi|242209630|ref|XP_002470661.1|/1.19901e-52/predicted protein [Postia placenta Mad-698-R]
GME6752_g	EL	0	0	0.67	0	-	-	-	-	gi|238582519|ref|XP_002389957.1|/1.88445e-14/hypothetical protein MPER_10847 [Moniliophthora perniciosa FA553]
GME9506_g	EL	0	0	0.67	0	-	-	-	-	gi|299756406|ref|XP_001829311.2|/1.44574e-90/hypothetical protein CC1G_00490 [Coprinopsis cinerea okayama7#130]
GME1713_g	EL	0	0	0.33	0	-	-	-	-	-
GME3880_g	MA	0	0	0	0.34	-	-	-	-	-
GME3426_g	MA	0	0	0	2.85	ko02020//Two-component system;ko01100//Metabolic pathways;ko00591//Linoleic acid metabolism;ko00051//Fructose and mannose metabolism;ko00362//Benzoate degradation;ko00363//Bisphenol degradation;ko01110//Biosynthesis of secondary metabolites;ko00903//Limonene and pinene degradation;ko00650//Butanoate metabolism;ko00626//Naphthalene degradation;ko00625//Chloroalkane and chloroalkene degradation;ko0…	-	-	-	gi|403412537|emb|CCL99237.1|/9.69948e-122/predicted protein [Fibroporia radiculosa]
GME3391_g	MA	0	0	0	0.67	-	-	-	-	gi|336388176|gb|EGO29320.1|/4.74959e-160/hypothetical protein SERLADRAFT_353987 [Serpula lacrymans var. lacrymans S7.9]
GME3915_g	MA	0	0	0	0.34	-	-	-	-	gi|390604910|gb|EIN14301.1|/5.71661e-23/hypothetical protein PUNSTDRAFT_96055 [Punctularia strigosozonata HHB-11173 SS5]
GME6379_g	MA	0	0	0	0.5	ko00230//Purine metabolism;ko04113//Meiosis - yeast	-	-	-	gi|336370283|gb|EGN98623.1|/0/hypothetical protein SERLA73DRAFT_54585 [Serpula lacrymans var. lacrymans S7.3]
GME3607_g	MA	0	0	0	0.67	-	-	-	-	gi|302679018|ref|XP_003029191.1|/3.22184e-06/hypothetical protein SCHCODRAFT_111111 [Schizophyllum commune H4-8]
GME3571_g	MA	0	0	0	1.01	-	-	-	-	gi|299742891|ref|XP_001835401.2|/2.56949e-140/hypothetical protein CC1G_05363 [Coprinopsis cinerea okayama7#130]
GME10704_g	MA	0	0	0	0.84	-	-	-	-	gi|302678305|ref|XP_003028835.1|/9.98796e-57/hypothetical protein SCHCODRAFT_83064 [Schizophyllum commune H4-8]
GME6867_g	MA	0	0	0	1.17	-	-	-	-	gi|170098955|ref|XP_001880696.1|/1.64889e-89/predicted protein [Laccaria bicolor S238N-H82]
GME7057_g	MA	0	0	0	0.34	-	-	-	-	gi|170095667|ref|XP_001879054.1|/4.65504e-98/predicted protein [Laccaria bicolor S238N-H82]
GME10732_g	MA	0	0	0	0.34	ko00040//Pentose and glucuronate interconversions	-	GO:0016837//carbon-oxygen lyase activity, acting on polysaccharides	GO:0044247//cellular polysaccharide catabolic process	gi|299746989|ref|XP_001839398.2|/3.15938e-75/pectate lyase B [Coprinopsis cinerea okayama7#130]
GME6637_g	MA	0	0	0	0.5	-	-	-	-	gi|170103897|ref|XP_001883163.1|/1.84832e-100/predicted protein [Laccaria bicolor S238N-H82]
GME8439_g	MA	0	0	0	0.34	-	-	GO:0016407//acetyltransferase activity	-	gi|299747833|ref|XP_002911225.1|/5.15403e-77/hypothetical protein CC1G_14654 [Coprinopsis cinerea okayama7#130]
GME5021_g	MA	0	0	0	3.18	-	-	-	-	gi|170108854|ref|XP_001885635.1|/2.92104e-76/predicted protein [Laccaria bicolor S238N-H82]
GME6650_g	MA	0	0	0	1.84	-	-	-	-	gi|302681209|ref|XP_003030286.1|/1.28752e-06/hypothetical protein SCHCODRAFT_257819 [Schizophyllum commune H4-8]
GME9009_g	MA	0	0	0	3.02	-	-	-	-	gi|170113984|ref|XP_001888190.1|/7.43273e-55/predicted protein [Laccaria bicolor S238N-H82]
GME500_g	MA	0	0	0	0.5	-	-	-	-	gi|392590027|gb|EIW79357.1|/6.42243e-19/hypothetical protein CONPUDRAFT_138491 [Coniophora puteana RWD-64-598 SS2]
GME10129_g	MA	0	0	0	1.17	-	-	GO:0016787//hydrolase activity	GO:0044238//primary metabolic process	gi|114324587|gb|ABI63599.1|/3.32783e-157/acetyl xylan esterase [Volvariella volvacea]
GME2565_g	MA	0	0	0	0.5	-	-	-	-	gi|170116503|ref|XP_001889442.1|/0/predicted protein [Laccaria bicolor S238N-H82]
GME1229_g	MA	0	0	0	0.34	-	-	-	-	-
GME6630_g	MA	0	0	0	0.34	-	-	-	-	gi|392568608|gb|EIW61782.1|/1.7224e-91/Metalloprotease [Trametes versicolor FP-101664 SS1]
GME5965_g	MA	0	0	0	0.34	ko01100//Metabolic pathways;ko00564//Glycerophospholipid metabolism	-	GO:0016831//carboxy-lyase activity	GO:0006644//phospholipid metabolic process	gi|169864509|ref|XP_001838863.1|/1.56719e-165/phosphatidylserine decarboxylase [Coprinopsis cinerea okayama7#130]
GME5172_g	MA	0	0	0	0.34	-	-	GO:0008080//N-acetyltransferase activity	-	gi|170109853|ref|XP_001886133.1|/4.7824e-57/N-acetyltransferase [Laccaria bicolor S238N-H82]
GME3066_g	MA	0	0	0	1.01	ko00624//Polycyclic aromatic hydrocarbon degradation;ko01100//Metabolic pathways;ko00627//Aminobenzoate degradation;ko00363//Bisphenol degradation;ko01110//Biosynthesis of secondary metabolites;ko00903//Limonene and pinene degradation;ko00945//Stilbenoid, diarylheptanoid and gingerol biosynthesis;ko01120//Microbial metabolism in diverse environments	-	-	-	gi|299746194|ref|XP_001837807.2|/9.72517e-96/cytochrome P450 [Coprinopsis cinerea okayama7#130]
GME6116_g	MA	0	0	0	1.01	-	-	-	-	-
GME6377_g	MA	0	0	0	0.34	ko04111//Cell cycle - yeast	-	-	-	gi|393227624|gb|EJD35294.1|/9.12351e-11/hypothetical protein AURDEDRAFT_117413 [Auricularia delicata TFB-10046 SS5]
GME3232_g	MA	0	0	0	10.22	-	-	-	-	gi|169855998|ref|XP_001834661.1|/5.33389e-137/hypothetical protein CC1G_05798 [Coprinopsis cinerea okayama7#130]
GME8197_g	MA	0	0	0	0.67	-	-	-	-	gi|395326458|gb|EJF58867.1|/2.25951e-53/NAD(P)-binding protein [Dichomitus squalens LYAD-421 SS1]
GME9219_g	MA	0	0	0	2.18	ko04111//Cell cycle - yeast	-	-	-	gi|170090424|ref|XP_001876434.1|/3.14188e-149/hypothetical protein LACBIDRAFT_311273 [Laccaria bicolor S238N-H82]
GME6074_g	MA	0	0	0	0.34	-	-	-	-	-
GME4572_g	MA	0	0	0	0.34	-	-	-	-	gi|302681601|ref|XP_003030482.1|/4.86577e-160/hypothetical protein SCHCODRAFT_57159 [Schizophyllum commune H4-8]
GME5730_g	MA	0	0	0	1.84	-	-	GO:0003677//DNA binding	-	gi|169856962|ref|XP_001835134.1|/9.48302e-14/hypothetical protein CC1G_07276 [Coprinopsis cinerea okayama7#130]
GME2467_g	MA	0	0	0	0.5	-	-	-	-	gi|393214610|gb|EJD00103.1|/9.98172e-22/hypothetical protein FOMMEDRAFT_159715 [Fomitiporia mediterranea MF3/22]
GME6479_g	MA	0	0	0	0.34	ko00624//Polycyclic aromatic hydrocarbon degradation;ko01100//Metabolic pathways;ko00627//Aminobenzoate degradation;ko00363//Bisphenol degradation;ko01110//Biosynthesis of secondary metabolites;ko00903//Limonene and pinene degradation;ko00945//Stilbenoid, diarylheptanoid and gingerol biosynthesis;ko01120//Microbial metabolism in diverse environments;ko01100//Metabolic pathways;ko00360//Phenylalan…	-	-	-	gi|170103023|ref|XP_001882727.1|/2.4038e-134/predicted protein [Laccaria bicolor S238N-H82]
GME11320_g	MA	0	0	0	6.87	-	-	-	-	gi|392597429|gb|EIW86751.1|/1.31795e-76/Isochorismatase hydrolase [Coniophora puteana RWD-64-598 SS2]
GME10818_g	MA	0	0	0	0.34	-	-	-	-	gi|299738308|ref|XP_002910064.1|/9.01566e-39/NWD2 [Coprinopsis cinerea okayama7#130]
GME4067_g	MA	0	0	0	0.34	-	-	-	-	gi|302685079|ref|XP_003032220.1|/7.60663e-12/hypothetical protein SCHCODRAFT_56045 [Schizophyllum commune H4-8]
GME7849_g	MA	0	0	0	0.34	-	-	-	-	gi|170094044|ref|XP_001878243.1|/5.49432e-109/predicted protein [Laccaria bicolor S238N-H82]
GME4047_g	MA	0	0	0	1.01	-	-	-	-	-
GME10859_g	MA	0	0	0	0.34	ko00071//Fatty acid metabolism;ko01100//Metabolic pathways;ko00561//Glycerolipid metabolism;ko01110//Biosynthesis of secondary metabolites;ko00626//Naphthalene degradation;ko00930//Caprolactam degradation;ko00010//Glycolysis / Gluconeogenesis;ko00625//Chloroalkane and chloroalkene degradation;ko01120//Microbial metabolism in diverse environments;ko00350//Tyrosine metabolism	-	GO:0046872//metal ion binding;GO:0016491//oxidoreductase activity	GO:0008152//metabolic process	gi|358055606|dbj|GAA98437.1|/1.07142e-25/hypothetical protein E5Q_05123 [Mixia osmundae IAM 14324]
GME1259_g	MA	0	0	0	1.01	-	-	-	-	-
GME677_g	MA	0	0	0	1.17	ko03460//Fanconi anemia pathway;ko01100//Metabolic pathways;ko00250//Alanine, aspartate and glutamate metabolism;ko00240//Pyrimidine metabolism;ko04146//Peroxisome	-	-	-	gi|170097930|ref|XP_001880184.1|/3.53559e-100/predicted protein [Laccaria bicolor S238N-H82]
GME7511_g	MA	0	0	0	0.34	ko01100//Metabolic pathways;ko00624//Polycyclic aromatic hydrocarbon degradation;ko00340//Histidine metabolism;ko00540//Lipopolysaccharide biosynthesis;ko01120//Microbial metabolism in diverse environments;ko00350//Tyrosine metabolism	-	-	-	gi|389749449|gb|EIM90620.1|/2.09774e-113/S-adenosyl-L-methionine-dependent methyltransferase [Stereum hirsutum FP-91666 SS1]
GME7583_g	MA	0	0	0	1.17	-	-	-	-	-
GME9191_g	MA	0	0	0	0.34	ko00624//Polycyclic aromatic hydrocarbon degradation;ko01100//Metabolic pathways;ko00627//Aminobenzoate degradation;ko00363//Bisphenol degradation;ko01110//Biosynthesis of secondary metabolites;ko00903//Limonene and pinene degradation;ko00945//Stilbenoid, diarylheptanoid and gingerol biosynthesis;ko01120//Microbial metabolism in diverse environments;ko01100//Metabolic pathways;ko00360//Phenylalan…	-	GO:0046872//metal ion binding	-	gi|170090418|ref|XP_001876431.1|/4.2745e-141/potential P450 cytochrome [Laccaria bicolor S238N-H82]
GME5608_g	MA	0	0	0	0.34	-	-	-	-	gi|170104316|ref|XP_001883372.1|/1.72108e-169/predicted protein [Laccaria bicolor S238N-H82]
GME7269_g	MA	0	0	0	0.34	-	-	-	-	gi|393246447|gb|EJD53956.1|/1.12075e-12/hypothetical protein AURDEDRAFT_148725 [Auricularia delicata TFB-10046 SS5]
GME7408_g	MA	0	0	0	0.34	-	-	-	-	gi|299740074|ref|XP_001840456.2|/3.0714e-60/hypothetical protein CC1G_11613 [Coprinopsis cinerea okayama7#130]
GME10402_g	MA	0	0	0	0.34	-	-	-	-	gi|238582519|ref|XP_002389957.1|/2.7215e-33/hypothetical protein MPER_10847 [Moniliophthora perniciosa FA553]
GME9864_g	MA	0	0	0	0.84	-	-	-	-	gi|67524505|ref|XP_660314.1|/6.97293e-33/hypothetical protein AN2710.2 [Aspergillus nidulans FGSC A4]
GME4754_g	MA	0	0	0	0.34	-	-	-	-	gi|389741467|gb|EIM82655.1|/5.5342e-27/hypothetical protein STEHIDRAFT_63561 [Stereum hirsutum FP-91666 SS1]
GME6554_g	MA	0	0	0	1.34	-	-	-	-	gi|170113984|ref|XP_001888190.1|/2.59829e-52/predicted protein [Laccaria bicolor S238N-H82]
GME751_g	MA	0	0	0	0.34	ko01100//Metabolic pathways;ko00860//Porphyrin and chlorophyll metabolism;ko01110//Biosynthesis of secondary metabolites	-	-	-	gi|392569046|gb|EIW62220.1|/7.81468e-42/NAD-P-binding protein [Trametes versicolor FP-101664 SS1]
GME10752_g	MA	0	0	0	0.34	-	-	-	-	gi|169604170|ref|XP_001795506.1|/1.38706e-13/hypothetical protein SNOG_05095 [Phaeosphaeria nodorum SN15]
GME3646_g	MA	0	0	0	1.01	-	-	-	-	gi|393212816|gb|EJC98315.1|/1.24968e-44/hypothetical protein FOMMEDRAFT_23854 [Fomitiporia mediterranea MF3/22]
GME1510_g	MA	0	0	0	1.34	ko00624//Polycyclic aromatic hydrocarbon degradation;ko01100//Metabolic pathways;ko00627//Aminobenzoate degradation;ko00363//Bisphenol degradation;ko01110//Biosynthesis of secondary metabolites;ko00903//Limonene and pinene degradation;ko00945//Stilbenoid, diarylheptanoid and gingerol biosynthesis;ko01120//Microbial metabolism in diverse environments;ko01100//Metabolic pathways;ko00590//Arachidoni…	-	-	-	gi|336388517|gb|EGO29661.1|/2.63529e-160/hypothetical protein SERLADRAFT_433629 [Serpula lacrymans var. lacrymans S7.9]
GME6222_g	MA	0	0	0	1.17	ko01100//Metabolic pathways;ko00450//Selenocompound metabolism	-	-	-	gi|393221188|gb|EJD06673.1|/1.28035e-103/PLP-dependent transferase [Fomitiporia mediterranea MF3/22]
GME8141_g	MA	0	0	0	0.34	ko00040//Pentose and glucuronate interconversions	-	-	-	gi|302675224|ref|XP_003027296.1|/8.10231e-96/polysaccharide lyase family 1 protein [Schizophyllum commune H4-8]
GME2828_g	MA	0	0	0	0.67	-	-	-	-	gi|336384809|gb|EGO25957.1|/0/hypothetical protein SERLADRAFT_369310 [Serpula lacrymans var. lacrymans S7.9]
GME12050_g	MA	0	0	0	21.11	ko01100//Metabolic pathways;ko00052//Galactose metabolism;ko00330//Arginine and proline metabolism;ko00603//Glycosphingolipid biosynthesis - globo series;ko00561//Glycerolipid metabolism;ko00600//Sphingolipid metabolism;ko00511//Other glycan degradation	-	GO:0016798//hydrolase activity, acting on glycosyl bonds	GO:0008152//metabolic process	gi|393212672|gb|EJC98171.1|/2.3492e-146/glycoside hydrolase [Fomitiporia mediterranea MF3/22]
GME4119_g	MA	0	0	0	0.34	-	-	-	-	gi|169843026|ref|XP_001828244.1|/2.51967e-53/metalloprotease [Coprinopsis cinerea okayama7#130]
GME10558_g	MA	0	0	0	0.34	-	-	-	-	gi|170099491|ref|XP_001880964.1|/1.18664e-44/predicted protein [Laccaria bicolor S238N-H82]
GME10400_g	MA	0	0	0	0.5	-	-	-	-	gi|238582519|ref|XP_002389957.1|/2.13787e-33/hypothetical protein MPER_10847 [Moniliophthora perniciosa FA553]
GME3563_g	MA	0	0	0	0.34	-	-	-	-	-
GME6989_g	MA	0	0	0	0.5	-	-	-	-	gi|170087070|ref|XP_001874758.1|/7.05287e-41/predicted protein [Laccaria bicolor S238N-H82]
GME7936_g	MA	0	0	0	0.34	-	-	-	-	gi|170094866|ref|XP_001878654.1|/4.60529e-38/predicted protein [Laccaria bicolor S238N-H82]
GME10154_g	MA	0	0	0	0.34	-	-	-	-	gi|389743727|gb|EIM84911.1|/2.81516e-27/phosphoglycerate mutase-like protein [Stereum hirsutum FP-91666 SS1]
GME9865_g	MA	0	0	0	0.5	-	-	-	-	gi|302680871|ref|XP_003030117.1|/1.88332e-30/hypothetical protein SCHCODRAFT_82691 [Schizophyllum commune H4-8]
GME5256_g	MA	0	0	0	2.85	ko05131//Shigellosis;ko04120//Ubiquitin mediated proteolysis;ko04340//Hedgehog signaling pathway;ko04310//Wnt signaling pathway;ko04114//Oocyte meiosis;ko04710//Circadian rhythm - mammal	-	-	-	gi|299752879|ref|XP_001832905.2|/1.22754e-100/F-box/WD repeat-containing protein 11 [Coprinopsis cinerea okayama7#130]
GME4182_g	MA	0	0	0	0.34	-	-	-	-	-
GME10860_g	MA	0	0	0	0.84	-	-	-	-	gi|169855828|ref|XP_001834578.1|/0/hypothetical protein CC1G_12456 [Coprinopsis cinerea okayama7#130]
GME6633_g	MA	0	0	0	0.67	-	-	-	-	gi|302693096|ref|XP_003036227.1|/2.29337e-10/hypothetical protein SCHCODRAFT_106102 [Schizophyllum commune H4-8]
GME11179_g	MA	0	0	0	0.67	-	-	-	-	-
GME5831_g	MA	0	0	0	0.34	ko03010//Ribosome;ko00970//Aminoacyl-tRNA biosynthesis	-	GO:0016874//ligase activity	GO:0006412//translation	gi|169852011|ref|XP_001832693.1|/7.24413e-86/asparaginyl-tRNA synthetase [Coprinopsis cinerea okayama7#130]
GME921_g	MA	0	0	0	0.67	-	-	-	-	gi|170092413|ref|XP_001877428.1|/8.11341e-118/predicted protein [Laccaria bicolor S238N-H82]
GME3061_g	MA	0	0	0	1.34	-	-	-	-	gi|170096040|ref|XP_001879240.1|/9.69123e-93/predicted protein [Laccaria bicolor S238N-H82]
GME4522_g	MA	0	0	0	0.34	ko04666//Fc gamma R-mediated phagocytosis;ko04360//Axon guidance;ko04810//Regulation of actin cytoskeleton	-	GO:0004672//protein kinase activity;GO:0032559	GO:0006464//cellular protein modification process	gi|169855118|ref|XP_001834229.1|/0/TKL/LISK/LISK-DD1 protein kinase [Coprinopsis cinerea okayama7#130]
GME9888_g	MA	0	0	0	0.34	-	-	-	-	gi|169863252|ref|XP_001838248.1|/1.89877e-31/NWD2 [Coprinopsis cinerea okayama7#130]
GME8578_g	MA	0	0	0	0.5	-	-	-	-	gi|302694073|ref|XP_003036715.1|/2.32578e-27/hypothetical protein SCHCODRAFT_102900 [Schizophyllum commune H4-8]
GME10350_g	MA	0	0	0	0.34	ko05215//Prostate cancer;ko05200//Pathways in cancer;ko00480//Glutathione metabolism;ko00980//Metabolism of xenobiotics by cytochrome P450;ko00982//Drug metabolism - cytochrome P450	-	-	-	gi|336375203|gb|EGO03539.1|/3.57078e-67/hypothetical protein SERLA73DRAFT_129880 [Serpula lacrymans var. lacrymans S7.3]
GME6170_g	MA	0	0	0	0.34	ko01100//Metabolic pathways;ko00520//Amino sugar and nucleotide sugar metabolism;ko00500//Starch and sucrose metabolism;ko01110//Biosynthesis of secondary metabolites	-	GO:0016787//hydrolase activity	GO:0044238//primary metabolic process	gi|116199031|ref|XP_001225327.1|/1.9132e-74/hypothetical protein CHGG_07671 [Chaetomium globosum CBS 148.51]
GME3210_g	MA	0	0	0	1.01	-	-	-	-	gi|169868942|ref|XP_001841040.1|/1.1352e-34/hypothetical protein CC1G_04884 [Coprinopsis cinerea okayama7#130]
GME383_g	MA	0	0	0	0.34	ko04011//MAPK signaling pathway - yeast	GO:0043231//intracellular membrane-bounded organelle	GO:0001071//nucleic acid binding transcription factor activity	GO:0006351//transcription, DNA-dependent	gi|170100987|ref|XP_001881711.1|/2.40155e-63/predicted protein [Laccaria bicolor S238N-H82]
GME9065_g	MA	0	0	0	2.01	-	-	-	-	gi|299746075|ref|XP_001837715.2|/9.41212e-45/hypothetical protein CC1G_06921 [Coprinopsis cinerea okayama7#130]
GME3211_g	MA	0	0	0	1.34	-	-	-	-	gi|170093558|ref|XP_001878000.1|/3.9484e-26/predicted protein [Laccaria bicolor S238N-H82]
GME73_g	MA	0	0	0	0.34	-	-	-	-	gi|170104607|ref|XP_001883517.1|/1.29301e-11/predicted protein [Laccaria bicolor S238N-H82]
GME9819_g	MA	0	0	0	0.34	-	-	-	-	gi|336363180|gb|EGN91607.1|/1.84616e-53/hypothetical protein SERLA73DRAFT_192210 [Serpula lacrymans var. lacrymans S7.3]
GME8987_g	MA	0	0	0	0.34	-	-	-	-	gi|170108854|ref|XP_001885635.1|/1.0073e-44/predicted protein [Laccaria bicolor S238N-H82]
GME7025_g	MA	0	0	0	0.34	ko04113//Meiosis - yeast	GO:0031224//intrinsic to membrane	GO:0022857//transmembrane transporter activity	GO:0006810//transport	gi|170118368|ref|XP_001890363.1|/1.42256e-41/predicted protein [Laccaria bicolor S238N-H82]
GME11657_g	MA	0	0	0	0.34	-	-	-	-	gi|336370165|gb|EGN98506.1|/3.68827e-57/hypothetical protein SERLA73DRAFT_183555 [Serpula lacrymans var. lacrymans S7.3]
GME7569_g	MA	0	0	0	0.34	-	-	-	-	gi|170117808|ref|XP_001890089.1|/3.38491e-60/predicted protein [Laccaria bicolor S238N-H82]
GME11679_g	MA	0	0	0	0.34	-	-	-	-	-
GME5420_g	MA	0	0	0	0.34	-	-	-	-	gi|393214697|gb|EJD00190.1|/7.01412e-12/hypothetical protein FOMMEDRAFT_159840 [Fomitiporia mediterranea MF3/22]
GME5810_g	MA	0	0	0	0.34	ko01100//Metabolic pathways;ko00500//Starch and sucrose metabolism	-	-	-	gi|259147278|emb|CAY80531.1|/1.95435e-24/Muc1p [Saccharomyces cerevisiae EC1118]
GME10667_g	MA	0	0	0	0.34	ko02020//Two-component system;ko01100//Metabolic pathways;ko00460//Cyanoamino acid metabolism;ko00940//Phenylpropanoid biosynthesis;ko00500//Starch and sucrose metabolism;ko02030//Bacterial chemotaxis;ko01110//Biosynthesis of secondary metabolites	-	-	-	gi|384497752|gb|EIE88243.1|/8.36807e-51/hypothetical protein RO3G_12954 [Rhizopus delemar RA 99-880]
GME4662_g	MA	0	0	0	2.68	ko00520//Amino sugar and nucleotide sugar metabolism;ko01110//Biosynthesis of secondary metabolites	-	GO:0003824//catalytic activity	-	gi|170093812|ref|XP_001878127.1|/9.00334e-49/carbohydrate esterase family 4 protein [Laccaria bicolor S238N-H82]
GME10454_g	MA	0	0	0	0.5	-	-	-	-	gi|37529673|gb|AAQ92757.1|/6.6858e-27/volvatoxin A2 precursor [Volvariella volvacea]
GME9159_g	MA	0	0	0	0.5	ko04142//Lysosome	-	GO:0008233//peptidase activity	-	gi|392568202|gb|EIW61376.1|/0/tripeptidyl peptidase A [Trametes versicolor FP-101664 SS1]
GME5186_g	MA	0	0	0	0.34	-	-	-	-	-
GME7715_g	MA	0	0	0	0.67	-	-	-	-	gi|170093938|ref|XP_001878190.1|/2.11186e-119/predicted protein [Laccaria bicolor S238N-H82]
GME3120_g	MA	0	0	0	2.68	-	-	-	-	gi|170116642|ref|XP_001889511.1|/6.55993e-177/predicted protein [Laccaria bicolor S238N-H82]
GME4711_g	MA	0	0	0	9.55	-	-	-	-	-
GME7459_g	MA	0	0	0	0.34	-	-	-	-	-
GME5916_g	MA	0	0	0	0.67	ko01100//Metabolic pathways;ko00310//Lysine degradation;ko00780//Biotin metabolism	-	-	-	gi|392569022|gb|EIW62196.1|/4.17486e-69/Metalloprotease [Trametes versicolor FP-101664 SS1]
GME11000_g	MA	0	0	0	0.34	-	-	-	-	gi|299747069|ref|XP_001839332.2|/3.6228e-15/hypothetical protein CC1G_08199 [Coprinopsis cinerea okayama7#130]
GME9465_g	MA	0	0	0	0.84	-	-	-	-	-
GME6994_g	MA	0	0	0	0.34	-	-	-	-	gi|170109101|ref|XP_001885758.1|/9.34808e-50/predicted protein [Laccaria bicolor S238N-H82]
GME1819_g	MA	0	0	0	0.34	-	-	-	-	-
GME4636_g	MA	0	0	0	0.67	-	-	-	-	-
GME3684_g	MA	0	0	0	0.84	ko01100//Metabolic pathways;ko00071//Fatty acid metabolism;ko01110//Biosynthesis of secondary metabolites;ko00626//Naphthalene degradation;ko00010//Glycolysis / Gluconeogenesis;ko00625//Chloroalkane and chloroalkene degradation;ko00980//Metabolism of xenobiotics by cytochrome P450;ko00830//Retinol metabolism;ko00982//Drug metabolism - cytochrome P450;ko00350//Tyrosine metabolism;ko01120//Microbia…	-	GO:0003824//catalytic activity;GO:0046914//transition metal ion binding	GO:0008152//metabolic process	gi|242207353|ref|XP_002469530.1|/2.40869e-51/predicted protein [Postia placenta Mad-698-R]
GME9450_g	MA	0	0	0	0.34	-	-	GO:0004721//phosphoprotein phosphatase activity	GO:0006464//cellular protein modification process;GO:0006796//phosphate-containing compound metabolic process	gi|169845563|ref|XP_001829501.1|/0/ATP dependent DNA ligase [Coprinopsis cinerea okayama7#130]
GME9766_g	MA	0	0	0	0.34	ko02010//ABC transporters;ko00642//Ethylbenzene degradation;ko01100//Metabolic pathways;ko00071//Fatty acid metabolism;ko00362//Benzoate degradation;ko01110//Biosynthesis of secondary metabolites;ko00592//alpha-Linolenic acid metabolism;ko00280//Valine, leucine and isoleucine degradation;ko00281//Geraniol degradation;ko01120//Microbial metabolism in diverse environments	-	GO:0016746//transferase activity, transferring acyl groups	-	gi|299749535|ref|XP_001836176.2|/4.91743e-144/3-ketoacyl-CoA thiolase [Coprinopsis cinerea okayama7#130]
GME2186_g	MA	0	0	0	8.04	-	-	-	-	gi|336370233|gb|EGN98574.1|/3.50361e-67/hypothetical protein SERLA73DRAFT_110132 [Serpula lacrymans var. lacrymans S7.3]
GME10999_g	MA	0	0	0	0.34	-	-	-	-	gi|390602834|gb|EIN12226.1|/8.35999e-16/hypothetical protein PUNSTDRAFT_96924 [Punctularia strigosozonata HHB-11173 SS5]
GME6510_g	MA	0	0	0	1.34	-	-	-	-	-
GME7527_g	MA	0	0	0	0.84	-	-	-	-	gi|238584437|ref|XP_002390560.1|/5.80516e-12/hypothetical protein MPER_10140 [Moniliophthora perniciosa FA553]
GME8772_g	MA	0	0	0	0.5	-	-	-	-	gi|302697197|ref|XP_003038277.1|/3.70008e-99/hypothetical protein SCHCODRAFT_230978 [Schizophyllum commune H4-8]
GME9400_g	MA	0	0	0	0.34	-	-	-	-	-
GME6639_g	MA	0	0	0	0.84	-	-	-	-	gi|390599670|gb|EIN09066.1|/7.75942e-110/soluble quino protein glucose dehydrogenase, partial [Punctularia strigosozonata HHB-11173 SS5]
GME2080_g	MA	0	0	0	0.5	-	-	-	-	gi|67525735|ref|XP_660929.1|/6.89946e-25/hypothetical protein AN3325.2 [Aspergillus nidulans FGSC A4]
GME11353_g	MA	0	0	0	0.5	ko01100//Metabolic pathways;ko00010//Glycolysis / Gluconeogenesis;ko00040//Pentose and glucuronate interconversions;ko01120//Microbial metabolism in diverse environments;ko01110//Biosynthesis of secondary metabolites	-	GO:0005488//binding;GO:0003824//catalytic activity	GO:0044238//primary metabolic process	gi|336387880|gb|EGO29024.1|/3.71531e-124/hypothetical protein SERLADRAFT_456343 [Serpula lacrymans var. lacrymans S7.9]
GME11429_g	MA	0	0	0	0.67	-	-	-	-	gi|170084029|ref|XP_001873238.1|/2.73918e-88/predicted protein [Laccaria bicolor S238N-H82]
GME6406_g	MA	0	0	0	0.34	ko01100//Metabolic pathways;ko00052//Galactose metabolism;ko00520//Amino sugar and nucleotide sugar metabolism;ko01120//Microbial metabolism in diverse environments;ko00020//Citrate cycle (TCA cycle);ko01110//Biosynthesis of secondary metabolites	-	GO:0016773//phosphotransferase activity, alcohol group as acceptor;GO:0000166//nucleotide binding	GO:0044262//cellular carbohydrate metabolic process;GO:0016310//phosphorylation	gi|390600719|gb|EIN10114.1|/7.42305e-95/Galactokinase [Punctularia strigosozonata HHB-11173 SS5]
GME3888_g	MA	0	0	0	2.35	-	-	-	-	gi|170109101|ref|XP_001885758.1|/1.08879e-53/predicted protein [Laccaria bicolor S238N-H82]
GME5464_g	MA	0	0	0	0.67	-	-	-	-	gi|170088448|ref|XP_001875447.1|/3.32422e-88/predicted protein [Laccaria bicolor S238N-H82]
GME12018_g	MA	0	0	0	0.34	-	-	-	-	gi|238575941|ref|XP_002387852.1|/1.8504e-18/hypothetical protein MPER_13205 [Moniliophthora perniciosa FA553]
GME6122_g	MA	0	0	0	2.18	-	-	GO:0046872//metal ion binding	GO:0006351//transcription, DNA-dependent	gi|170113994|ref|XP_001888195.1|/0/predicted protein [Laccaria bicolor S238N-H82]
GME753_g	MA	0	0	0	0.5	ko04146//Peroxisome	-	GO:0005488//binding	-	gi|170098422|ref|XP_001880430.1|/0/predicted protein [Laccaria bicolor S238N-H82]
GME9223_g	MA	0	0	0	0.34	-	-	-	-	gi|238582519|ref|XP_002389957.1|/6.14676e-14/hypothetical protein MPER_10847 [Moniliophthora perniciosa FA553]
GME3390_g	MA	0	0	0	0.34	-	-	-	-	gi|336388177|gb|EGO29321.1|/6.41334e-43/hypothetical protein SERLADRAFT_433320 [Serpula lacrymans var. lacrymans S7.9]
GME10066_g	MA	0	0	0	2.18	-	-	-	-	gi|389739906|gb|EIM81098.1|/8.09099e-81/hypothetical protein STEHIDRAFT_67049 [Stereum hirsutum FP-91666 SS1]
GME11646_g	MA	0	0	0	0.34	-	-	GO:0005488//binding	-	gi|299755965|ref|XP_002912149.1|/3.44337e-165/DNA repair and recombination protein pif1 [Coprinopsis cinerea okayama7#130]
GME9804_g	MA	0	0	0	1.17	-	-	GO:0070011	-	gi|336368475|gb|EGN96818.1|/0/hypothetical protein SERLA73DRAFT_124603 [Serpula lacrymans var. lacrymans S7.3]
GME6858_g	MA	0	0	0	0.5	-	-	-	-	gi|302683909|ref|XP_003031635.1|/7.70267e-34/hypothetical protein SCHCODRAFT_234683 [Schizophyllum commune H4-8]
GME9716_g	MA	0	0	0	0.34	-	-	-	-	gi|336374107|gb|EGO02444.1|/5.01649e-74/hypothetical protein SERLA73DRAFT_175937 [Serpula lacrymans var. lacrymans S7.3]
GME3508_g	MA	0	0	0	0.34	-	-	-	-	gi|389739180|gb|EIM80374.1|/7.63654e-06/hypothetical protein STEHIDRAFT_162791 [Stereum hirsutum FP-91666 SS1]
GME1553_g	MA	0	0	0	0.34	ko02010//ABC transporters	GO:0031224//intrinsic to membrane	GO:0017111//nucleoside-triphosphatase activity;GO:0015405;GO:0032559	GO:0009207;GO:0051234//establishment of localization	gi|170109163|ref|XP_001885789.1|/0/pleiotropic drug resistance ABC transporter [Laccaria bicolor S238N-H82]
GME624_g	MA	0	0	0	0.5	-	-	-	-	gi|390598703|gb|EIN08101.1|/5.79058e-07/hypothetical protein PUNSTDRAFT_135616 [Punctularia strigosozonata HHB-11173 SS5]
GME9202_g	MA	0	0	0	2.68	ko01100//Metabolic pathways;ko00520//Amino sugar and nucleotide sugar metabolism;ko00500//Starch and sucrose metabolism;ko01110//Biosynthesis of secondary metabolites	-	GO:0016787//hydrolase activity	GO:0008152//metabolic process	gi|395330769|gb|EJF63152.1|/1.45165e-103/hypothetical protein DICSQDRAFT_102982 [Dichomitus squalens LYAD-421 SS1]
GME9123_g	MA	0	0	0	0.67	-	-	-	-	gi|170108848|ref|XP_001885632.1|/2.65727e-26/predicted protein [Laccaria bicolor S238N-H82]
GME6621_g	MA	0	0	0	1.34	-	-	-	-	-
GME5687_g	MA	0	0	0	3.85	-	-	-	-	gi|299756690|ref|XP_001829528.2|/0/hypothetical protein CC1G_00707 [Coprinopsis cinerea okayama7#130]
GME404_g	MA	0	0	0	0.34	-	-	-	-	gi|336372299|gb|EGO00638.1|/3.11444e-12/hypothetical protein SERLA73DRAFT_178498 [Serpula lacrymans var. lacrymans S7.3]
GME3189_g	MA	0	0	0	0.5	-	-	-	-	gi|393229702|gb|EJD37320.1|/1.2651e-24/hypothetical protein AURDEDRAFT_173594 [Auricularia delicata TFB-10046 SS5]
GME3529_g	MA	0	0	0	0.34	-	-	-	-	gi|170112832|ref|XP_001887617.1|/7.74608e-64/predicted protein [Laccaria bicolor S238N-H82]
GME1598_g	MA	0	0	0	0.5	ko01100//Metabolic pathways;ko00624//Polycyclic aromatic hydrocarbon degradation;ko00340//Histidine metabolism;ko00623//Toluene degradation;ko00627//Aminobenzoate degradation;ko00361//Chlorocyclohexane and chlorobenzene degradation;ko00363//Bisphenol degradation;ko00903//Limonene and pinene degradation;ko00626//Naphthalene degradation;ko01120//Microbial metabolism in diverse environments;ko04011/…	-	-	-	gi|169851748|ref|XP_001832563.1|/8.82051e-147/multidrug resistance protein 4 [Coprinopsis cinerea okayama7#130]
GME1164_g	MA	0	0	0	4.19	-	-	-	-	-
GME9857_g	MA	0	0	0	1.17	-	-	-	-	gi|170092913|ref|XP_001877678.1|/1.1104e-06/predicted protein [Laccaria bicolor S238N-H82]
GME5015_g	MA	0	0	0	0.34	-	-	-	-	gi|138754310|emb|CAL36606.1|/1.67763e-78/potassium transporter [Hebeloma cylindrosporum]
GME270_g	MA	0	0	0	1.17	-	-	-	-	gi|392565066|gb|EIW58243.1|/2.67699e-68/DUF676-domain-containing protein [Trametes versicolor FP-101664 SS1]
GME6654_g	MA	0	0	0	0.5	-	-	-	-	gi|389746290|gb|EIM87470.1|/2.34507e-06/hypothetical protein STEHIDRAFT_121088 [Stereum hirsutum FP-91666 SS1]
GME170_g	MA	0	0	0	0.5	-	-	GO:0046914//transition metal ion binding	-	gi|170104926|ref|XP_001883676.1|/3.43331e-100/predicted protein [Laccaria bicolor S238N-H82]
GME6995_g	MA	0	0	0	0.5	-	-	-	-	gi|170113984|ref|XP_001888190.1|/2.00776e-60/predicted protein [Laccaria bicolor S238N-H82]
GME10225_g	MA	0	0	0	0.34	-	-	-	-	gi|367048783|ref|XP_003654771.1|/7.66356e-11/hypothetical protein THITE_2117974 [Thielavia terrestris NRRL 8126]
GME7531_g	MA	0	0	0	0.67	ko01100//Metabolic pathways;ko00624//Polycyclic aromatic hydrocarbon degradation;ko00340//Histidine metabolism;ko00540//Lipopolysaccharide biosynthesis;ko01120//Microbial metabolism in diverse environments;ko00350//Tyrosine metabolism	-	-	-	gi|389749479|gb|EIM90650.1|/3.70138e-121/S-adenosyl-L-methionine-dependent methyltransferase [Stereum hirsutum FP-91666 SS1]
GME9381_g	MA	0	0	0	0.34	-	-	-	-	gi|170085965|ref|XP_001874206.1|/1.01686e-13/predicted protein [Laccaria bicolor S238N-H82]
GME7008_g	MA	0	0	0	18.26	-	-	-	-	gi|170113984|ref|XP_001888190.1|/3.66319e-38/predicted protein [Laccaria bicolor S238N-H82]
GME9031_g	MA	0	0	0	0.67	-	-	-	-	-
GME8580_g	MA	0	0	0	0.67	-	-	-	-	gi|170091754|ref|XP_001877099.1|/8.25786e-36/predicted protein [Laccaria bicolor S238N-H82]
GME6647_g	MA	0	0	0	1.17	-	-	-	-	gi|170100709|ref|XP_001881572.1|/1.75701e-08/predicted protein [Laccaria bicolor S238N-H82]
GME3425_g	MA	0	0	0	0.34	-	-	-	-	gi|170087790|ref|XP_001875118.1|/1.7966e-30/predicted protein [Laccaria bicolor S238N-H82]
GME8977_g	MA	0	0	0	0.34	-	-	-	-	gi|395323818|gb|EJF56274.1|/2.12181e-56/NAD(P)-binding protein, partial [Dichomitus squalens LYAD-421 SS1]
GME9839_g	MA	0	0	0	0.34	-	GO:0044464//cell part	GO:0046914//transition metal ion binding	-	gi|170098052|ref|XP_001880245.1|/2.99072e-55/predicted protein [Laccaria bicolor S238N-H82]
GME3530_g	MA	0	0	0	1.01	-	-	-	-	gi|170112834|ref|XP_001887618.1|/4.03897e-60/predicted protein [Laccaria bicolor S238N-H82]
GME3542_g	MA	0	0	0	0.5	-	-	GO:0005488//binding	GO:0009108//coenzyme biosynthetic process	gi|302689395|ref|XP_003034377.1|/1.42174e-113/hypothetical protein SCHCODRAFT_256471 [Schizophyllum commune H4-8]
GME6055_g	MA	0	0	0	0.34	ko00260//Glycine, serine and threonine metabolism	-	-	-	gi|395328165|gb|EJF60559.1|/4.19153e-136/alcohol oxidase [Dichomitus squalens LYAD-421 SS1]
GME9789_g	MA	0	0	0	0.5	-	-	-	-	-
GME2728_g	MA	0	0	0	0.67	-	-	-	-	gi|299738900|ref|XP_001834878.2|/6.34376e-09/hypothetical protein CC1G_09805 [Coprinopsis cinerea okayama7#130]
GME6427_g	MA	0	0	0	0.67	-	-	-	-	gi|170095960|ref|XP_001879200.1|/1.59224e-74/predicted protein [Laccaria bicolor S238N-H82]
GME1389_g	MA	0	0	0	1.68	-	-	-	-	-
GME1387_g	MA	0	0	0	0.34	-	-	-	-	gi|170109101|ref|XP_001885758.1|/1.0635e-33/predicted protein [Laccaria bicolor S238N-H82]
GME8220_g	MA	0	0	0	0.67	-	-	-	-	gi|169858480|ref|XP_001835885.1|/6.51877e-12/hypothetical protein CC1G_02973 [Coprinopsis cinerea okayama7#130]
GME8855_g	MA	0	0	0	0.67	-	-	-	-	gi|170092471|ref|XP_001877457.1|/2.04295e-07/hypothetical protein LACBIDRAFT_313890 [Laccaria bicolor S238N-H82]
GME10747_g	MA	0	0	0	0.5	-	-	-	-	gi|170113984|ref|XP_001888190.1|/2.23221e-53/predicted protein [Laccaria bicolor S238N-H82]
GME2408_g	MA	0	0	0	1.34	ko04111//Cell cycle - yeast;ko05166//HTLV-I infection;ko04110//Cell cycle;ko04115//p53 signaling pathway;ko04111//Cell cycle - yeast;ko04113//Meiosis - yeast	-	-	-	gi|393210512|gb|EJC97288.1|/1.8677e-13/kinase-like protein [Fomitiporia mediterranea MF3/22]
GME3362_g	MA	0	0	0	0.34	ko05166//HTLV-I infection;ko05152//Tuberculosis;ko04612//Antigen processing and presentation	-	GO:0005488//binding	-	gi|169864455|ref|XP_001838836.1|/5.99631e-27/transcriptional activator [Coprinopsis cinerea okayama7#130]
GME4739_g	MA	0	0	0	0.34	-	-	-	-	-
GME3664_g	MA	0	0	0	1.51	ko00040//Pentose and glucuronate interconversions	-	GO:0003824//catalytic activity	GO:0008152//metabolic process	gi|392561677|gb|EIW54858.1|/1.18319e-56/NAD-P-binding protein [Trametes versicolor FP-101664 SS1]
GME8791_g	MA	0	0	0	0.34	ko01100//Metabolic pathways;ko00071//Fatty acid metabolism;ko01110//Biosynthesis of secondary metabolites;ko00626//Naphthalene degradation;ko00010//Glycolysis / Gluconeogenesis;ko00625//Chloroalkane and chloroalkene degradation;ko00980//Metabolism of xenobiotics by cytochrome P450;ko00830//Retinol metabolism;ko00982//Drug metabolism - cytochrome P450;ko01120//Microbial metabolism in diverse envir…	-	GO:0046914//transition metal ion binding;GO:0016616//oxidoreductase activity, acting on the CH-OH group of donors, NAD or NADP as acceptor	GO:0006067//ethanol metabolic process	gi|169860721|ref|XP_001836995.1|/2.15204e-164/class III ADH enzyme [Coprinopsis cinerea okayama7#130]
GME3835_g	MA	0	0	0	0.34	-	-	GO:0003676//nucleic acid binding;GO:0001071//nucleic acid binding transcription factor activity	GO:0006351//transcription, DNA-dependent	gi|299750383|ref|XP_001836714.2|/6.23762e-88/hypothetical protein CC1G_08099 [Coprinopsis cinerea okayama7#130]
GME1339_g	MA	0	0	0	1.01	-	-	GO:0016829//lyase activity	-	gi|169860003|ref|XP_001836638.1|/1.27856e-169/oxalate decarboxylase [Coprinopsis cinerea okayama7#130]
GME2169_g	MA	0	0	0	0.84	-	-	GO:0003824//catalytic activity	-	gi|302674449|ref|XP_003026909.1|/8.93354e-130/hypothetical protein SCHCODRAFT_70977 [Schizophyllum commune H4-8]
GME3578_g	MA	0	0	0	0.34	ko00624//Polycyclic aromatic hydrocarbon degradation;ko01100//Metabolic pathways;ko00627//Aminobenzoate degradation;ko00363//Bisphenol degradation;ko01110//Biosynthesis of secondary metabolites;ko00903//Limonene and pinene degradation;ko00945//Stilbenoid, diarylheptanoid and gingerol biosynthesis;ko01120//Microbial metabolism in diverse environments;ko01100//Metabolic pathways;ko00627//Aminobenzo…	-	-	-	gi|336365283|gb|EGN93634.1|/6.16196e-95/hypothetical protein SERLA73DRAFT_189361 [Serpula lacrymans var. lacrymans S7.3]
GME2734_g	MA	0	0	0	0.5	-	-	-	-	-
GME11034_g	MA	0	0	0	0.67	-	-	-	-	gi|170108854|ref|XP_001885635.1|/1.57932e-37/predicted protein [Laccaria bicolor S238N-H82]
GME6437_g	MA	0	0	0	0.67	-	-	-	-	-
GME11804_g	MA	0	0	0	1.17	-	-	-	-	gi|390601074|gb|EIN10468.1|/6.71839e-67/metalloprotease [Punctularia strigosozonata HHB-11173 SS5]
GME11498_g	MA	0	0	0	0.5	ko01100//Metabolic pathways;ko00520//Amino sugar and nucleotide sugar metabolism;ko00500//Starch and sucrose metabolism;ko01110//Biosynthesis of secondary metabolites;ko01100//Metabolic pathways;ko00500//Starch and sucrose metabolism	-	GO:0016787//hydrolase activity	-	gi|9755897|emb|CAC02964.1|/0/CEL6 protein [Agaricus bisporus]
GME5774_g	MA	0	0	0	0.34	ko04011//MAPK signaling pathway - yeast;ko04113//Meiosis - yeast	-	GO:0000166//nucleotide binding	-	gi|170110496|ref|XP_001886453.1|/7.5669e-90/heterotrimeric G-protein alpha subunit, GPA3-like protein [Laccaria bicolor S238N-H82]
GME2776_g	MA	0	0	0	2.51	ko02020//Two-component system;ko01100//Metabolic pathways;ko00591//Linoleic acid metabolism;ko00051//Fructose and mannose metabolism;ko00362//Benzoate degradation;ko00363//Bisphenol degradation;ko01110//Biosynthesis of secondary metabolites;ko00903//Limonene and pinene degradation;ko00650//Butanoate metabolism;ko00626//Naphthalene degradation;ko00625//Chloroalkane and chloroalkene degradation;ko0…	-	-	-	gi|336370538|gb|EGN98878.1|/4.67337e-108/hypothetical protein SERLA73DRAFT_181580 [Serpula lacrymans var. lacrymans S7.3]
GME3556_g	MA	0	0	0	0.67	-	-	-	-	-
GME11050_g	MA	0	0	0	2.68	-	-	-	-	gi|170108854|ref|XP_001885635.1|/8.21154e-74/predicted protein [Laccaria bicolor S238N-H82]
GME7763_g	MA	0	0	0	0.67	-	-	-	-	gi|170089753|ref|XP_001876099.1|/2.366e-32/predicted protein [Laccaria bicolor S238N-H82]
GME5974_g	MA	0	0	0	1.01	-	-	-	-	gi|392567484|gb|EIW60659.1|/1.52796e-56/hypothetical protein TRAVEDRAFT_165630 [Trametes versicolor FP-101664 SS1]
GME424_g	MA	0	0	0	0.34	ko01100//Metabolic pathways;ko00310//Lysine degradation;ko00780//Biotin metabolism	-	-	-	gi|46130696|ref|XP_389128.1|/2.63589e-27/hypothetical protein FG08952.1 [Gibberella zeae PH-1]
GME2773_g	MA	0	0	0	0.5	-	-	-	-	gi|170109992|ref|XP_001886202.1|/6.84392e-14/predicted protein [Laccaria bicolor S238N-H82]
GME6466_g	MA	0	0	0	0.67	-	-	-	-	-
GME7581_g	MA	0	0	0	1.01	-	-	-	-	-
GME6516_g	MA	0	0	0	0.5	-	-	-	-	-
GME8186_g	MA	0	0	0	0.5	-	-	-	-	gi|389741155|gb|EIM82344.1|/2.23315e-07/hypothetical protein STEHIDRAFT_171293 [Stereum hirsutum FP-91666 SS1]
GME6077_g	MA	0	0	0	1.17	-	-	GO:0003824//catalytic activity	GO:0008152//metabolic process	gi|299746601|ref|XP_001840594.2|/1.47243e-116/oxidoreductase family protein [Coprinopsis cinerea okayama7#130]
GME11998_g	MA	0	0	0	0.34	-	-	-	-	gi|170101080|ref|XP_001881757.1|/6.83491e-17/predicted protein [Laccaria bicolor S238N-H82]
GME11207_g	MA	0	0	0	0.34	-	-	-	-	gi|392590024|gb|EIW79354.1|/2.95486e-13/hypothetical protein CONPUDRAFT_167111 [Coniophora puteana RWD-64-598 SS2]
GME6667_g	MA	0	0	0	0.84	ko01100//Metabolic pathways;ko00591//Linoleic acid metabolism;ko00051//Fructose and mannose metabolism;ko00363//Bisphenol degradation;ko00362//Benzoate degradation;ko01110//Biosynthesis of secondary metabolites;ko00650//Butanoate metabolism;ko00903//Limonene and pinene degradation;ko00626//Naphthalene degradation;ko00625//Chloroalkane and chloroalkene degradation;ko01120//Microbial metabolism in …	-	-	-	gi|242217987|ref|XP_002474788.1|/2.13471e-116/predicted protein [Postia placenta Mad-698-R]
GME1950_g	MA	0	0	0	0.67	ko00310//Lysine degradation	-	-	GO:0009201;GO:0018130	gi|170090111|ref|XP_001876278.1|/5.2928e-124/predicted protein [Laccaria bicolor S238N-H82]
GME6571_g	MA	0	0	0	0.5	-	-	-	-	gi|170113984|ref|XP_001888190.1|/9.45017e-65/predicted protein [Laccaria bicolor S238N-H82]
GME8154_g	MA	0	0	0	0.5	-	-	-	-	gi|169848315|ref|XP_001830865.1|/3.77915e-07/hypothetical protein CC1G_02316 [Coprinopsis cinerea okayama7#130]
GME7695_g	MA	0	0	0	0.84	-	-	-	-	gi|170093860|ref|XP_001878151.1|/2.77939e-30/predicted protein [Laccaria bicolor S238N-H82]
GME4687_g	MA	0	0	0	0.5	-	-	-	-	gi|12862434|dbj|BAB32470.1|/5.76922e-102/Pol-like protein Pol-2 [Tricholoma matsutake]
GME4910_g	MA	0	0	0	3.02	-	-	-	-	gi|403412334|emb|CCL99034.1|/1.0581e-56/predicted protein [Fibroporia radiculosa]
GME3592_g	MA	0	0	0	0.34	-	-	-	-	gi|336375711|gb|EGO04047.1|/3.1854e-10/hypothetical protein SERLA73DRAFT_175780 [Serpula lacrymans var. lacrymans S7.3]
GME3104_g	MA	0	0	0	0.84	-	-	-	-	gi|170096692|ref|XP_001879566.1|/2.55174e-19/predicted protein [Laccaria bicolor S238N-H82]
GME10622_g	MA	0	0	0	0.5	-	-	-	-	gi|169848403|ref|XP_001830909.1|/5.46535e-77/ADP-ribosylation factor [Coprinopsis cinerea okayama7#130]
GME4849_g	MA	0	0	0	0.84	-	-	GO:0008233//peptidase activity	-	gi|170085719|ref|XP_001874083.1|/3.04784e-79/deuterolysin M35 metalloprotease [Laccaria bicolor S238N-H82]
GME121_g	MA	0	0	0	4.19	-	GO:0016020//membrane	-	GO:0006810//transport	gi|302686158|ref|XP_003032759.1|/7.0259e-83/hypothetical protein SCHCODRAFT_67374 [Schizophyllum commune H4-8]
GME7090_g	MA	0	0	0	0.5	-	-	-	-	gi|317145289|ref|XP_003189692.1|/1.30535e-11/hypothetical protein AOR_1_130144 [Aspergillus oryzae RIB40]
GME4492_g	MA	0	0	0	1.17	-	-	GO:0005488//binding	-	gi|170089721|ref|XP_001876083.1|/5.60323e-23/predicted protein [Laccaria bicolor S238N-H82]
GME9057_g	MA	0	0	0	0.34	-	-	-	-	gi|302693122|ref|XP_003036240.1|/7.35927e-48/hypothetical protein SCHCODRAFT_232891 [Schizophyllum commune H4-8]
GME9895_g	MA	0	0	0	0.67	-	-	-	-	gi|170092279|ref|XP_001877361.1|/2.9687e-94/polysaccharide lyase family 14 protein [Laccaria bicolor S238N-H82]
GME3502_g	MA	0	0	0	0.34	-	-	-	-	gi|170093898|ref|XP_001878170.1|/2.63262e-31/reverse transcriptase-RNase H-integrase [Laccaria bicolor S238N-H82]
GME4544_g	MA	0	0	0	0.67	-	-	-	-	gi|299748354|ref|XP_002911279.1|/5.60414e-17/hypothetical protein CC1G_14708 [Coprinopsis cinerea okayama7#130]
GME713_g	MA	0	0	0	1.34	ko04146//Peroxisome;ko01100//Metabolic pathways;ko00071//Fatty acid metabolism;ko03010//Ribosome;ko04920//Adipocytokine signaling pathway;ko03320//PPAR signaling pathway;ko01100//Metabolic pathways;ko00360//Phenylalanine metabolism;ko00940//Phenylpropanoid biosynthesis;ko01110//Biosynthesis of secondary metabolites;ko00130//Ubiquinone and other terpenoid-quinone biosynthesis	-	-	-	gi|170097856|ref|XP_001880147.1|/1.19204e-172/AMP binding protein [Laccaria bicolor S238N-H82]
GME1147_g	MA	0	0	0	0.5	-	-	-	-	-
GME289_g	MA	0	0	0	0.5	-	-	-	-	gi|389745623|gb|EIM86804.1|/1.66081e-17/hypothetical protein STEHIDRAFT_147278 [Stereum hirsutum FP-91666 SS1]
GME9975_g	MA	0	0	0	0.34	-	-	-	-	gi|299751751|ref|XP_001830460.2|/4.32564e-19/hypothetical protein CC1G_07375 [Coprinopsis cinerea okayama7#130]
GME5727_g	MA	0	0	0	0.5	-	-	-	-	gi|336381317|gb|EGO22469.1|/2.05951e-07/hypothetical protein SERLADRAFT_409958 [Serpula lacrymans var. lacrymans S7.9]
GME9687_g	MA	0	0	0	0.84	-	-	-	-	gi|376372663|gb|AFB35537.1|/1.17438e-73/hypothetical protein [Volvariella volvacea]
GME3733_g	MA	0	0	0	0.34	-	-	-	-	gi|403411707|emb|CCL98407.1|/8.33156e-13/predicted protein [Fibroporia radiculosa]
GME3419_g	MA	0	0	0	0.34	-	-	-	-	gi|336368413|gb|EGN96756.1|/6.22178e-20/hypothetical protein SERLA73DRAFT_161770 [Serpula lacrymans var. lacrymans S7.3]
GME317_g	MA	0	0	0	0.34	ko04011//MAPK signaling pathway - yeast	-	-	GO:0009987//cellular process	gi|392565311|gb|EIW58488.1|/3.08704e-100/hypothetical protein TRAVEDRAFT_124042 [Trametes versicolor FP-101664 SS1]
GME8825_g	MA	0	0	0	0.34	-	-	-	-	gi|395325862|gb|EJF58278.1|/1.63269e-49/hypothetical protein DICSQDRAFT_110397 [Dichomitus squalens LYAD-421 SS1]
GME245_g	MA	0	0	0	0.34	-	-	-	-	gi|403414277|emb|CCM00977.1|/1.81568e-36/predicted protein [Fibroporia radiculosa]
GME9289_g	MA	0	0	0	0.34	-	-	-	-	gi|170102981|ref|XP_001882706.1|/1.22175e-27/predicted protein [Laccaria bicolor S238N-H82]
GME10222_g	MA	0	0	0	4.86	-	-	-	-	gi|392570252|gb|EIW63425.1|/6.53868e-10/hypothetical protein TRAVEDRAFT_69438 [Trametes versicolor FP-101664 SS1]
GME10157_g	MA	0	0	0	0.84	ko01100//Metabolic pathways;ko00520//Amino sugar and nucleotide sugar metabolism;ko00500//Starch and sucrose metabolism;ko01110//Biosynthesis of secondary metabolites;ko01100//Metabolic pathways;ko00500//Starch and sucrose metabolism	-	GO:0016798//hydrolase activity, acting on glycosyl bonds	GO:0005975//carbohydrate metabolic process	gi|49333363|gb|AAT64006.1|/0/cellobiohydrolase I-I [Volvariella volvacea]
GME7038_g	MA	0	0	0	0.34	-	-	-	-	gi|170101268|ref|XP_001881851.1|/2.82037e-20/predicted protein [Laccaria bicolor S238N-H82]
GME10147_g	MA	0	0	0	0.34	ko05215//Prostate cancer;ko05200//Pathways in cancer;ko00480//Glutathione metabolism;ko00980//Metabolism of xenobiotics by cytochrome P450;ko00982//Drug metabolism - cytochrome P450;ko00052//Galactose metabolism	-	-	-	gi|170093245|ref|XP_001877844.1|/0/glyoxal oxidase [Laccaria bicolor S238N-H82]
GME10740_g	MA	0	0	0	0.67	-	-	-	-	gi|170113984|ref|XP_001888190.1|/1.30896e-59/predicted protein [Laccaria bicolor S238N-H82]
GME8204_g	MA	0	0	0	0.67	-	-	-	-	gi|238590731|ref|XP_002392409.1|/1.48284e-48/hypothetical protein MPER_08017 [Moniliophthora perniciosa FA553]
GME1604_g	MA	0	0	0	0.34	-	-	-	-	gi|299742505|ref|XP_001832531.2|/1.14279e-148/EXS family protein/ERD1/XPR1/SYG1 family protein [Coprinopsis cinerea okayama7#130]
GME874_g	MA	0	0	0	0.5	-	-	-	-	-
GME7228_g	MA	0	0	0	0.34	-	-	-	-	-
GME678_g	MA	0	0	0	0.67	ko03460//Fanconi anemia pathway;ko04146//Peroxisome	-	-	GO:0006810//transport	gi|170097930|ref|XP_001880184.1|/1.48284e-48/predicted protein [Laccaria bicolor S238N-H82]
GME2625_g	MA	0	0	0	0.34	ko00900//Terpenoid backbone biosynthesis	-	-	-	gi|302682684|ref|XP_003031023.1|/2.44229e-22/hypothetical protein SCHCODRAFT_68620 [Schizophyllum commune H4-8]
GME1506_g	MA	0	0	0	0.34	ko03008//Ribosome biogenesis in eukaryotes;ko05130//Pathogenic Escherichia coli infection	-	GO:0005488//binding	-	gi|392561750|gb|EIW54931.1|/3.55405e-26/hypothetical protein TRAVEDRAFT_83958, partial [Trametes versicolor FP-101664 SS1]
GME10727_g	MA	0	0	0	0.67	-	-	-	-	gi|170087260|ref|XP_001874853.1|/7.88371e-111/glycoside hydrolase family 5 protein [Laccaria bicolor S238N-H82]
GME1094_g	MA	0	0	0	0.34	-	-	-	-	-
GME4145_g	MA	0	0	0	2.01	ko01100//Metabolic pathways;ko03010//Ribosome;ko00051//Fructose and mannose metabolism	-	GO:0005488//binding	-	gi|299744849|ref|XP_001831307.2|/9.73782e-121/L-arabinitol 4-dehydrogenase [Coprinopsis cinerea okayama7#130]
GME4630_g	MA	0	0	0	0.84	-	-	-	-	gi|170098208|ref|XP_001880323.1|/2.26101e-92/predicted protein [Laccaria bicolor S238N-H82]
GME8943_g	MA	0	0	0	0.34	-	-	-	-	gi|299740685|ref|XP_001833916.2|/3.12194e-147/hypothetical protein CC1G_01593 [Coprinopsis cinerea okayama7#130]
GME88_g	MA	0	0	0	0.5	-	-	-	-	-
GME6720_g	MA	0	0	0	2.51	-	-	-	-	gi|170100565|ref|XP_001881500.1|/2.41749e-132/predicted protein [Laccaria bicolor S238N-H82]
GME7653_g	MA	0	0	0	0.34	-	-	-	-	gi|170107945|ref|XP_001885182.1|/2.93478e-07/predicted protein [Laccaria bicolor S238N-H82]
GME679_g	MA	0	0	0	4.36	ko03460//Fanconi anemia pathway;ko04146//Peroxisome	-	-	-	gi|170097930|ref|XP_001880184.1|/1.07733e-83/predicted protein [Laccaria bicolor S238N-H82]
GME8877_g	MA	0	0	0	1.34	ko00260//Glycine, serine and threonine metabolism	-	-	-	gi|170106181|ref|XP_001884302.1|/4.28472e-175/predicted protein [Laccaria bicolor S238N-H82]
GME7277_g	MA	0	0	0	0.34	-	-	-	-	gi|170102933|ref|XP_001882682.1|/3.56019e-133/predicted protein [Laccaria bicolor S238N-H82]
GME8191_g	MA	0	0	0	1.51	-	-	-	-	-
GME6005_g	MA	0	0	0	0.67	-	-	-	-	gi|170110172|ref|XP_001886292.1|/5.68813e-07/predicted protein [Laccaria bicolor S238N-H82]
GME5979_g	MA	0	0	0	0.34	-	-	-	-	gi|393214723|gb|EJD00216.1|/1.09574e-74/hypothetical protein FOMMEDRAFT_22670 [Fomitiporia mediterranea MF3/22]
GME6982_g	MA	0	0	0	0.5	-	-	-	-	-
GME2885_g	MA	0	0	0	0.5	-	-	-	-	-
GME1623_g	BU/EG	0.36	0.33	0	0	ko00642//Ethylbenzene degradation;ko01100//Metabolic pathways;ko00627//Aminobenzoate degradation;ko00051//Fructose and mannose metabolism;ko00362//Benzoate degradation;ko00240//Pyrimidine metabolism;ko00903//Limonene and pinene degradation;ko01120//Microbial metabolism in diverse environments;ko00350//Tyrosine metabolism	-	GO:0004672//protein kinase activity;GO:0032559	GO:0006464//cellular protein modification process	gi|299742596|ref|XP_001832593.2|/1.71036e-127/other/RAN protein kinase [Coprinopsis cinerea okayama7#130]
GME9487_g	BU/EG	0.36	0.67	0	0	-	-	-	-	gi|392585064|gb|EIW74405.1|/7.05009e-23/hypothetical protein CONPUDRAFT_113421 [Coniophora puteana RWD-64-598 SS2]
GME4573_g	BU/EG	0.53	0.67	0	0	ko02020//Two-component system;ko01100//Metabolic pathways;ko00591//Linoleic acid metabolism;ko00051//Fructose and mannose metabolism;ko00362//Benzoate degradation;ko00363//Bisphenol degradation;ko01110//Biosynthesis of secondary metabolites;ko00903//Limonene and pinene degradation;ko00650//Butanoate metabolism;ko00626//Naphthalene degradation;ko00625//Chloroalkane and chloroalkene degradation;ko0…	-	-	-	gi|170102332|ref|XP_001882382.1|/9.0666e-109/predicted protein [Laccaria bicolor S238N-H82]
GME9557_g	BU/EG	0.71	0.67	0	0	-	-	-	-	gi|336373588|gb|EGO01926.1|/3.73823e-36/hypothetical protein SERLA73DRAFT_132602 [Serpula lacrymans var. lacrymans S7.3]
GME9256_g	BU/EG	0.53	0.67	0	0	-	-	-	-	-
GME5932_g	BU/EG	0.53	0.84	0	0	-	-	-	-	gi|402224668|gb|EJU04730.1|/2.15176e-19/FAS1 domain-containing protein [Dacryopinax sp. DJM-731 SS1]
GME2801_g	BU/EG	0.36	0.33	0	0	-	-	-	-	gi|299738414|ref|XP_001838342.2|/7.02975e-22/hypothetical protein CC1G_04786 [Coprinopsis cinerea okayama7#130]
GME1682_g	BU/EG	0.53	0.5	0	0	-	-	-	-	gi|299751230|ref|XP_001830141.2|/6.42549e-18/hypothetical protein CC1G_04574 [Coprinopsis cinerea okayama7#130]
GME2560_g	BU/EG	0.36	0.84	0	0	-	-	GO:0016741	GO:0006629//lipid metabolic process;GO:0006730//one-carbon metabolic process	gi|170114414|ref|XP_001888404.1|/0/sphingolipid C9-methyltransferase [Laccaria bicolor S238N-H82]
GME6303_g	BU/EG	0.71	0.84	0	0	-	-	-	-	gi|169862277|ref|XP_001837769.1|/1.0028e-28/hypothetical protein CC1G_06975 [Coprinopsis cinerea okayama7#130]
GME7402_g	BU/EG	0.71	0.33	0	0	-	-	-	-	gi|403415806|emb|CCM02506.1|/2.75907e-32/predicted protein [Fibroporia radiculosa]
GME3115_g	BU/EG	1.07	0.5	0	0	ko01100//Metabolic pathways;ko00930//Caprolactam degradation;ko00053//Ascorbate and aldarate metabolism;ko00030//Pentose phosphate pathway;ko01120//Microbial metabolism in diverse environments;ko01110//Biosynthesis of secondary metabolites	-	-	-	gi|392562955|gb|EIW56135.1|/1.07937e-137/D-lactonohydrolase-like protein [Trametes versicolor FP-101664 SS1]
GME4782_g	BU/EG	0.36	0.33	0	0	-	-	GO:0016787//hydrolase activity	-	gi|302888669|ref|XP_003043221.1|/7.61924e-33/hypothetical protein NECHADRAFT_86394 [Nectria haematococca mpVI 77-13-4]
GME8807_g	BU/EG	0.36	0.33	0	0	-	-	-	-	-
GME2421_g	BU/EG	4.63	0.5	0	0	-	-	-	-	gi|300431582|tpe|CBL43327.1|/3.75695e-39/TPA: arylamine N-acetyltransferase 1 [Coprinopsis cinerea]
GME6185_g	BU/EG	0.53	1.17	0	0	-	-	-	-	gi|390601753|gb|EIN11146.1|/3.69354e-87/hypothetical protein PUNSTDRAFT_131326 [Punctularia strigosozonata HHB-11173 SS5]
GME307_g	BU/EG	0.53	0.33	0	0	ko00930//Caprolactam degradation;ko01120//Microbial metabolism in diverse environments	-	-	-	gi|169613494|ref|XP_001800164.1|/4.51607e-175/hypothetical protein SNOG_09878 [Phaeosphaeria nodorum SN15]
GME619_g	BU/EG	1.96	1.67	0	0	-	-	-	-	gi|403416288|emb|CCM02988.1|/2.50923e-38/predicted protein [Fibroporia radiculosa]
GME3028_g	BU/EG	3.39	2.68	0	0	-	-	-	-	-
GME3096_g	BU/EG	0.36	0.33	0	0	-	-	-	-	-
GME562_g	BU/EG	2.49	1.51	0	0	-	-	-	-	gi|170086406|ref|XP_001874426.1|/1.20059e-34/predicted protein [Laccaria bicolor S238N-H82]
GME3740_g	BU/EG	0.53	0.33	0	0	-	-	-	-	gi|169865205|ref|XP_001839206.1|/1.66204e-08/hypothetical protein CC1G_07921 [Coprinopsis cinerea okayama7#130]
GME11810_g	BU/EG	0.89	1.34	0	0	-	-	-	-	gi|170106399|ref|XP_001884411.1|/9.41553e-146/predicted protein [Laccaria bicolor S238N-H82]
GME1282_g	BU/EG	1.07	0.84	0	0	ko05134//Legionellosis	-	-	GO:0006412//translation	gi|302677598|ref|XP_003028482.1|/1.58651e-122/hypothetical protein SCHCODRAFT_86015 [Schizophyllum commune H4-8]
GME7095_g	BU/EG	0.89	2.01	0	0	ko01100//Metabolic pathways;ko00520//Amino sugar and nucleotide sugar metabolism;ko00051//Fructose and mannose metabolism	GO:0044464//cell part	GO:0048037//cofactor binding;GO:0016836//hydro-lyase activity	GO:0006013//mannose metabolic process	gi|169862535|ref|XP_001837894.1|/0/GDP-mannose 4,6-dehydratase [Coprinopsis cinerea okayama7#130]
GME1535_g	BU/EG	0.71	0.67	0	0	ko03013//RNA transport;ko03430//Mismatch repair;ko01100//Metabolic pathways;ko03440//Homologous recombination;ko01040//Biosynthesis of unsaturated fatty acids;ko00061//Fatty acid biosynthesis;ko01110//Biosynthesis of secondary metabolites;ko00640//Propanoate metabolism;ko00620//Pyruvate metabolism;ko03410//Base excision repair;ko01120//Microbial metabolism in diverse environments;ko00040//Pentose…	-	-	-	gi|390594932|gb|EIN04340.1|/3.2668e-113/NAD(P)-binding protein [Punctularia strigosozonata HHB-11173 SS5]
GME7230_g	BU/EG	0.89	2.01	0	0	ko05166//HTLV-I infection;ko04110//Cell cycle;ko04115//p53 signaling pathway;ko04111//Cell cycle - yeast	-	-	-	gi|170102507|ref|XP_001882469.1|/7.11284e-166/predicted protein [Laccaria bicolor S238N-H82]
GME1726_g	BU/EG	0.36	0.33	0	0	-	-	-	-	gi|169846848|ref|XP_001830138.1|/4.6753e-20/SH3 domain-containing protein [Coprinopsis cinerea okayama7#130]
GME3871_g	BU/EG	1.43	0.5	0	0	-	-	-	-	gi|170113984|ref|XP_001888190.1|/4.24339e-26/predicted protein [Laccaria bicolor S238N-H82]
GME5302_g	BU/EG	1.07	0.33	0	0	-	-	-	-	gi|392559530|gb|EIW52714.1|/1.06982e-48/hypothetical protein TRAVEDRAFT_53155 [Trametes versicolor FP-101664 SS1]
GME9790_g	BU/EG	0.36	0.33	0	0	ko04122//Sulfur relay system	GO:0044424//intracellular part	GO:0003723//RNA binding;GO:0032559	GO:0006400//tRNA modification	gi|302694583|ref|XP_003036970.1|/1.20476e-152/hypothetical protein SCHCODRAFT_48271 [Schizophyllum commune H4-8]
GME4293_g	BU/EG	1.43	1.51	0	0	ko05166//HTLV-I infection;ko03430//Mismatch repair;ko01100//Metabolic pathways;ko00230//Purine metabolism;ko03440//Homologous recombination;ko03410//Base excision repair;ko03030//DNA replication;ko03420//Nucleotide excision repair;ko00240//Pyrimidine metabolism	-	GO:0003676//nucleic acid binding;GO:0034061	GO:0006259//DNA metabolic process	gi|395331770|gb|EJF64150.1|/0/hypothetical protein DICSQDRAFT_81194 [Dichomitus squalens LYAD-421 SS1]
GME4835_g	BU/EG	2.14	1.51	0	0	-	GO:0043231//intracellular membrane-bounded organelle	-	GO:0006259//DNA metabolic process	gi|170116309|ref|XP_001889346.1|/4.60501e-68/predicted protein [Laccaria bicolor S238N-H82]
GME10592_g	BU/EG	0.89	0.33	0	0	-	-	-	-	-
GME4606_g	BU/EG	0.36	0.67	0	0	-	-	-	-	gi|299740745|ref|XP_001833963.2|/5.66301e-61/hypothetical protein CC1G_01640 [Coprinopsis cinerea okayama7#130]
GME5467_g	BU/EG	0.36	0.67	0	0	ko01100//Metabolic pathways;ko00380//Tryptophan metabolism	-	GO:0016769//transferase activity, transferring nitrogenous groups;GO:0016811//hydrolase activity, acting on carbon-nitrogen (but not peptide) bonds, in linear amides;GO:0048037//cofactor binding	GO:0008152//metabolic process	gi|299753060|ref|XP_001833037.2|/0/aminotransferase [Coprinopsis cinerea okayama7#130]
GME5102_g	BU/EG	0.89	0.67	0	0	-	-	-	-	gi|392569959|gb|EIW63132.1|/4.54029e-17/hypothetical protein TRAVEDRAFT_69249 [Trametes versicolor FP-101664 SS1]
GME7031_g	BU/EG	0.53	2.68	0	0	-	GO:0043234//protein complex	-	GO:0015031//protein transport	gi|170085015|ref|XP_001873731.1|/0/coatomer protein [Laccaria bicolor S238N-H82]
GME5096_g	BU/EG	0.36	0.33	0	0	-	-	-	-	gi|170108188|ref|XP_001885303.1|/4.53695e-06/predicted protein [Laccaria bicolor S238N-H82]
GME3065_g	BU/EG	0.36	0.33	0	0	ko00624//Polycyclic aromatic hydrocarbon degradation;ko01100//Metabolic pathways;ko00627//Aminobenzoate degradation;ko00363//Bisphenol degradation;ko01110//Biosynthesis of secondary metabolites;ko00903//Limonene and pinene degradation;ko00945//Stilbenoid, diarylheptanoid and gingerol biosynthesis;ko01120//Microbial metabolism in diverse environments	-	GO:0046872//metal ion binding	-	gi|299746194|ref|XP_001837807.2|/2.01524e-117/cytochrome P450 [Coprinopsis cinerea okayama7#130]
GME9362_g	BU/EG	1.07	0.33	0	0	ko01100//Metabolic pathways;ko00510//N-Glycan biosynthesis	-	-	-	gi|170113926|ref|XP_001888161.1|/6.43648e-27/predicted protein [Laccaria bicolor S238N-H82]
GME4615_g	BU/EG	0.53	1.34	0	0	ko03013//RNA transport	-	GO:0022892	GO:0015031//protein transport	gi|170097537|ref|XP_001879988.1|/0/predicted protein [Laccaria bicolor S238N-H82]
GME6508_g	BU/EG	0.89	3.51	0	0	-	-	-	-	gi|336369464|gb|EGN97805.1|/3.49172e-37/hypothetical protein SERLA73DRAFT_90914 [Serpula lacrymans var. lacrymans S7.3]
GME1410_g	BU/EG	0.36	0.84	0	0	-	-	-	-	gi|170113984|ref|XP_001888190.1|/6.09071e-34/predicted protein [Laccaria bicolor S238N-H82]
GME10816_g	BU/EG	0.36	0.5	0	0	-	-	-	-	gi|336372832|gb|EGO01171.1|/4.8666e-93/hypothetical protein SERLA73DRAFT_179271 [Serpula lacrymans var. lacrymans S7.3]
GME6618_g	BU/EG	0.36	0.33	0	0	-	-	-	-	-
GME3631_g	BU/EG	0.36	3.18	0	0	ko04111//Cell cycle - yeast	-	-	-	gi|299742526|ref|XP_001832544.2|/0/condensin subunit Cnd3 [Coprinopsis cinerea okayama7#130]
GME8500_g	BU/EG	1.6	3.01	0	0	ko00052//Galactose metabolism	-	GO:0005488//binding	GO:0044260;GO:0090304	gi|170090962|ref|XP_001876703.1|/0/predicted protein [Laccaria bicolor S238N-H82]
GME1138_g	BU/EG	0.53	0.5	0	0	-	-	-	-	gi|169869341|ref|XP_001841237.1|/3.64877e-29/hypothetical protein CC1G_11400 [Coprinopsis cinerea okayama7#130]
GME6062_g	BU/EG	0.53	0.5	0	0	ko00624//Polycyclic aromatic hydrocarbon degradation;ko01100//Metabolic pathways;ko00627//Aminobenzoate degradation;ko00363//Bisphenol degradation;ko01110//Biosynthesis of secondary metabolites;ko00903//Limonene and pinene degradation;ko00945//Stilbenoid, diarylheptanoid and gingerol biosynthesis;ko01120//Microbial metabolism in diverse environments;ko01100//Metabolic pathways;ko00590//Arachidoni…	-	-	-	gi|327343279|dbj|BAK09392.1|/2.26613e-137/cytochrome P450 [Postia placenta]
GME9010_g	BU/EG	3.03	3.85	0	0	-	-	-	-	gi|170113984|ref|XP_001888190.1|/8.90952e-61/predicted protein [Laccaria bicolor S238N-H82]
GME6004_g	BU/EG	0.71	0.5	0	0	-	-	-	-	gi|170095205|ref|XP_001878823.1|/6.42336e-148/predicted protein [Laccaria bicolor S238N-H82]
GME5912_g	BU/EG	0.36	0.33	0	0	-	-	-	-	-
GME11025_g	BU/EG	1.43	1.17	0	0	-	-	-	-	gi|170099762|ref|XP_001881099.1|/2.42379e-80/predicted protein [Laccaria bicolor S238N-H82]
GME6468_g	BU/EG	0.71	1.34	0	0	ko01100//Metabolic pathways;ko00230//Purine metabolism;ko00051//Fructose and mannose metabolism;ko02060//Phosphotransferase system (PTS);ko01110//Biosynthesis of secondary metabolites;ko03450//Non-homologous end-joining;ko03440//Homologous recombination	-	-	-	gi|388858155|emb|CCF48223.1|/4.70819e-56/uncharacterized protein [Ustilago hordei]
GME8732_g	BU/EG	1.78	1.34	0	0	-	-	-	-	gi|299747285|ref|XP_001836935.2|/7.16186e-38/hypothetical protein CC1G_00071 [Coprinopsis cinerea okayama7#130]
GME8296_g	BU/EG	0.53	1	0	0	-	-	-	-	-
GME1341_g	BU/EG	1.6	1.34	0	0	-	-	GO:0008233//peptidase activity;GO:0046872//metal ion binding	-	gi|392564325|gb|EIW57503.1|/6.91139e-159/cysteine proteinase [Trametes versicolor FP-101664 SS1]
GME11784_g	BU/EG	0.89	0.33	0	0	-	-	-	-	-
GME4690_g	BU/EG	0.71	1.17	0	0	-	-	-	-	gi|336365991|gb|EGN94339.1|/1.97487e-32/hypothetical protein SERLA73DRAFT_62688 [Serpula lacrymans var. lacrymans S7.3]
GME11736_g	BU/EG	1.07	0.67	0	0	-	-	-	-	gi|302698633|ref|XP_003038995.1|/1.18506e-122/hypothetical protein SCHCODRAFT_255771 [Schizophyllum commune H4-8]
GME896_g	BU/EG	0.89	0.67	0	0	-	-	-	-	gi|302681551|ref|XP_003030457.1|/2.12038e-102/hypothetical protein SCHCODRAFT_57227 [Schizophyllum commune H4-8]
GME296_g	BU/EG	0.71	1.34	0	0	ko01100//Metabolic pathways;ko00410//beta-Alanine metabolism;ko00770//Pantothenate and CoA biosynthesis;ko01110//Biosynthesis of secondary metabolites	-	-	-	gi|336368525|gb|EGN96868.1|/4.18875e-78/hypothetical protein SERLA73DRAFT_185080 [Serpula lacrymans var. lacrymans S7.3]
GME3593_g	BU/EG	0.71	1.17	0	0	-	-	-	-	gi|170115779|ref|XP_001889083.1|/3.04224e-36/predicted protein [Laccaria bicolor S238N-H82]
GME6704_g	BU/EG	0.53	1.51	0	0	-	-	-	-	-
GME2284_g	BU/EG	1.6	1.84	0	0	-	-	-	-	-
GME10845_g	BU/EG	0.71	2.34	0	0	-	-	-	-	gi|392586195|gb|EIW75532.1|/2.50562e-85/NAD(P)-binding protein [Coniophora puteana RWD-64-598 SS2]
GME1914_g	BU/EG	0.36	0.33	0	0	-	-	-	-	gi|392566347|gb|EIW59523.1|/6.25115e-82/Metallo-dependent hydrolase [Trametes versicolor FP-101664 SS1]
GME489_g	BU/EG	0.36	1.34	0	0	-	-	-	-	gi|37791155|gb|AAR03583.1|/0/laccase 5 [Volvariella volvacea]
GME3911_g	BU/EG	4.1	2.17	0	0	-	-	-	-	gi|393243063|gb|EJD50579.1|/4.45169e-36/hypothetical protein AURDEDRAFT_58292, partial [Auricularia delicata TFB-10046 SS5]
GME3883_g	BU/EG	0.71	1.17	0	0	ko04011//MAPK signaling pathway - yeast	-	-	-	gi|299741377|ref|XP_001834415.2|/7.47198e-102/pheromone B alpha 1 receptor [Coprinopsis cinerea okayama7#130]
GME6257_g	BU/EG	1.25	0.5	0	0	ko03008//Ribosome biogenesis in eukaryotes;ko03013//RNA transport	-	-	-	gi|392567310|gb|EIW60485.1|/2.39948e-63/RNase P/MRP p29 subunit [Trametes versicolor FP-101664 SS1]
GME6282_g	BU/EG	0.36	1.34	0	0	-	-	-	-	gi|299748936|ref|XP_001840254.2|/1.74122e-38/NWD2 [Coprinopsis cinerea okayama7#130]
GME10301_g	BU/EG	0.89	0.33	0	0	-	-	-	-	gi|170109992|ref|XP_001886202.1|/1.61314e-09/predicted protein [Laccaria bicolor S238N-H82]
GME5291_g	BU/EG	0.36	0.33	0	0	-	GO:0034708;GO:0043231//intracellular membrane-bounded organelle	GO:0008192;GO:0032561//guanyl ribonucleotide binding;GO:0003909//DNA ligase activity;GO:0032559	GO:0006259//DNA metabolic process;GO:0006397//mRNA processing	gi|392566964|gb|EIW60139.1|/5.39537e-159/hypothetical protein TRAVEDRAFT_164684 [Trametes versicolor FP-101664 SS1]
GME3088_g	BU/EG	1.07	0.84	0	0	ko04145//Phagosome;ko04144//Endocytosis	GO:0044464//cell part	-	GO:0015031//protein transport	gi|169856847|ref|XP_001835077.1|/5.24314e-157/VHS domain-containing protein [Coprinopsis cinerea okayama7#130]
GME9163_g	BU/EG	0.89	1.67	0	0	-	-	-	-	gi|170091582|ref|XP_001877013.1|/0/predicted protein [Laccaria bicolor S238N-H82]
GME10890_g	BU/EG	3.03	3.85	0	0	-	-	-	-	gi|170103400|ref|XP_001882915.1|/2.20988e-34/predicted protein [Laccaria bicolor S238N-H82]
GME1473_g	BU/EG	0.53	0.33	0	0	-	-	-	-	gi|366990229|ref|XP_003674882.1|/3.32937e-07/hypothetical protein NCAS_0B04250 [Naumovozyma castellii CBS 4309]
GME6579_g	BU/EG	1.6	6.69	0	0	-	-	-	-	gi|299748497|ref|XP_002911295.1|/7.48536e-59/hypothetical protein CC1G_14724 [Coprinopsis cinerea okayama7#130]
GME9207_g	BU/EG	4.81	3.35	0	0	ko00650//Butanoate metabolism;ko01100//Metabolic pathways;ko00785//Lipoic acid metabolism;ko00900//Terpenoid backbone biosynthesis;ko00280//Valine, leucine and isoleucine degradation;ko00072//Synthesis and degradation of ketone bodies;ko01110//Biosynthesis of secondary metabolites	-	GO:0003824//catalytic activity	GO:0018065//protein-cofactor linkage	gi|170114300|ref|XP_001888347.1|/3.98114e-42/predicted protein [Laccaria bicolor S238N-H82]
GME2401_g	BU/EG	0.36	0.33	0	0	-	-	-	GO:0006810//transport	gi|170107705|ref|XP_001885062.1|/1.00059e-171/MFS polyamine transporter [Laccaria bicolor S238N-H82]
GME3969_g	BU/EG	0.36	0.5	0	0	-	-	-	-	gi|170087070|ref|XP_001874758.1|/3.71143e-21/predicted protein [Laccaria bicolor S238N-H82]
GME10427_g	BU/EG	0.89	1	0	0	-	-	-	-	-
GME7897_g	BU/EG	1.6	3.18	0	0	-	-	-	-	gi|170087496|ref|XP_001874971.1|/7.08689e-108/predicted protein [Laccaria bicolor S238N-H82]
GME7513_g	BU/EG	0.36	0.67	0	0	ko05166//HTLV-I infection;ko04110//Cell cycle;ko04111//Cell cycle - yeast	-	-	-	gi|170094644|ref|XP_001878543.1|/6.85429e-152/predicted protein [Laccaria bicolor S238N-H82]
GME7164_g	BU/EG	0.36	1.17	0	0	-	-	-	-	gi|389742106|gb|EIM83293.1|/3.56676e-101/hypothetical protein STEHIDRAFT_33980, partial [Stereum hirsutum FP-91666 SS1]
GME1884_g	BU/EG	0.53	0.5	0	0	ko01100//Metabolic pathways;ko00230//Purine metabolism;ko03030//DNA replication;ko00240//Pyrimidine metabolism	-	-	-	gi|395330969|gb|EJF63351.1|/3.18611e-65/DNA polymerase alpha, subunit B [Dichomitus squalens LYAD-421 SS1]
GME11831_g	BU/EG	0.53	0.33	0	0	ko01100//Metabolic pathways;ko00624//Polycyclic aromatic hydrocarbon degradation;ko00340//Histidine metabolism;ko00623//Toluene degradation;ko00627//Aminobenzoate degradation;ko00361//Chlorocyclohexane and chlorobenzene degradation;ko00363//Bisphenol degradation;ko00903//Limonene and pinene degradation;ko00626//Naphthalene degradation;ko01120//Microbial metabolism in diverse environments;ko04011/…	-	-	-	gi|170107901|ref|XP_001885160.1|/3.2356e-155/MFS polyamine transporter [Laccaria bicolor S238N-H82]
GME4261_g	BU/EG	0.36	1.34	0	0	ko04141//Protein processing in endoplasmic reticulum;ko01100//Metabolic pathways;ko00513//Various types of N-glycan biosynthesis;ko00510//N-Glycan biosynthesis	-	-	-	gi|392565252|gb|EIW58429.1|/1.34403e-165/seven-hairpin glycosidase [Trametes versicolor FP-101664 SS1]
GME9691_g	BU/EG	2.14	6.86	0	0	-	-	GO:0005488//binding	GO:0044238//primary metabolic process;GO:0044260	gi|336390021|gb|EGO31164.1|/1.61413e-142/hypothetical protein SERLADRAFT_444740 [Serpula lacrymans var. lacrymans S7.9]
GME7034_g	BU/EG	0.53	1.17	0	0	-	-	-	-	gi|169865286|ref|XP_001839245.1|/6.42217e-81/hypothetical protein CC1G_12136 [Coprinopsis cinerea okayama7#130]
GME2839_g	BU/EG	0.53	0.67	0	0	-	-	-	-	gi|393220955|gb|EJD06440.1|/2.42427e-67/hypothetical protein FOMMEDRAFT_102223 [Fomitiporia mediterranea MF3/22]
GME7783_g	BU/EG	11.23	1.34	0	0	ko02020//Two-component system;ko01100//Metabolic pathways;ko00591//Linoleic acid metabolism;ko00051//Fructose and mannose metabolism;ko00362//Benzoate degradation;ko00363//Bisphenol degradation;ko01110//Biosynthesis of secondary metabolites;ko00903//Limonene and pinene degradation;ko00650//Butanoate metabolism;ko00626//Naphthalene degradation;ko00625//Chloroalkane and chloroalkene degradation;ko0…	-	GO:0003824//catalytic activity	GO:0008152//metabolic process	gi|170093992|ref|XP_001878217.1|/1.03129e-127/predicted protein [Laccaria bicolor S238N-H82]
GME5545_g	BU/EG	1.43	0.84	0	0	-	-	-	-	gi|392591250|gb|EIW80578.1|/6.92322e-49/hypothetical protein CONPUDRAFT_57412 [Coniophora puteana RWD-64-598 SS2]
GME2948_g	BU/EG	6.06	4.01	0	0	-	-	-	-	gi|392559512|gb|EIW52696.1|/8.75547e-20/ricin B-like lectin [Trametes versicolor FP-101664 SS1]
GME9922_g	BU/EG	0.36	0.84	0	0	ko01100//Metabolic pathways;ko00920//Sulfur metabolism;ko00270//Cysteine and methionine metabolism	-	-	-	gi|392586721|gb|EIW76057.1|/1.58033e-37/alpha beta hydrolase fold protein [Coniophora puteana RWD-64-598 SS2]
GME669_g	BU/EG	2.49	3.35	0	0	-	-	-	-	gi|170102773|ref|XP_001882602.1|/1.36358e-07/predicted protein [Laccaria bicolor S238N-H82]
GME6462_g	BU/EG	1.07	0.67	0	0	ko05166//HTLV-I infection;ko04110//Cell cycle;ko04115//p53 signaling pathway;ko04111//Cell cycle - yeast;ko04111//Cell cycle - yeast;ko05166//HTLV-I infection;ko04110//Cell cycle;ko04115//p53 signaling pathway;ko04111//Cell cycle - yeast;ko04113//Meiosis - yeast	-	-	-	gi|336368731|gb|EGN97074.1|/2.56486e-50/hypothetical protein SERLA73DRAFT_154414 [Serpula lacrymans var. lacrymans S7.3]
GME11756_g	BU/EG	0.89	0.5	0	0	-	-	-	-	gi|299755940|ref|XP_001828992.2|/1.28541e-46/hypothetical protein CC1G_01672 [Coprinopsis cinerea okayama7#130]
GME11687_g	BU/EG	0.36	0.5	0	0	ko01100//Metabolic pathways;ko00513//Various types of N-glycan biosynthesis;ko00510//N-Glycan biosynthesis	-	GO:0016740//transferase activity	-	gi|299755864|ref|XP_001828935.2|/3.0086e-178/beta-1,4-mannosyltransferase [Coprinopsis cinerea okayama7#130]
GME9026_g	BU/EG	0.36	0.5	0	0	-	-	GO:0000166//nucleotide binding;GO:0003824//catalytic activity	-	gi|169866113|ref|XP_001839649.1|/1.83096e-61/NADH-quinone oxidoreductase [Coprinopsis cinerea okayama7#130]
GME7561_g	BU/EG	0.53	0.33	0	0	-	-	-	-	gi|393238008|gb|EJD45547.1|/1.0976e-84/kinase-like protein [Auricularia delicata TFB-10046 SS5]
GME10588_g	BU/EG	0.36	1.17	0	0	ko00051//Fructose and mannose metabolism	-	GO:0003824//catalytic activity	GO:0006000//fructose metabolic process	gi|170100228|ref|XP_001881332.1|/0/predicted protein [Laccaria bicolor S238N-H82]
GME728_g	BU/EG	0.36	0.5	0	0	ko02020//Two-component system;ko01100//Metabolic pathways;ko00591//Linoleic acid metabolism;ko00051//Fructose and mannose metabolism;ko00362//Benzoate degradation;ko00363//Bisphenol degradation;ko01110//Biosynthesis of secondary metabolites;ko00903//Limonene and pinene degradation;ko00650//Butanoate metabolism;ko00626//Naphthalene degradation;ko00625//Chloroalkane and chloroalkene degradation;ko0…	-	GO:0003824//catalytic activity	GO:0008152//metabolic process	gi|170092421|ref|XP_001877432.1|/6.58237e-114/aado/keto reductase [Laccaria bicolor S238N-H82]
GME7197_g	BU/EG	1.78	0.33	0	0	-	-	-	-	gi|299743873|ref|XP_002910716.1|/1.28931e-06/hypothetical protein CC1G_15050 [Coprinopsis cinerea okayama7#130]
GME8954_g	BU/EG	0.71	1.51	0	0	-	-	GO:0046914//transition metal ion binding;GO:0003677//DNA binding;GO:0001071//nucleic acid binding transcription factor activity	GO:0006351//transcription, DNA-dependent	gi|336379100|gb|EGO20256.1|/7.14119e-78/hypothetical protein SERLADRAFT_452950 [Serpula lacrymans var. lacrymans S7.9]
GME11208_g	BU/EG	0.36	1.51	0	0	-	-	-	-	gi|255725918|ref|XP_002547885.1|/4.7142e-15/predicted protein [Candida tropicalis MYA-3404]
GME9771_g	BU/EG	0.36	0.84	0	0	-	-	GO:0003824//catalytic activity	-	gi|390604659|gb|EIN14050.1|/0/beta-glucan synthesis-associated protein [Punctularia strigosozonata HHB-11173 SS5]
GME7520_g	BU/EG	0.36	0.33	0	0	-	-	-	-	gi|170117150|ref|XP_001889763.1|/1.09183e-07/predicted protein [Laccaria bicolor S238N-H82]
GME12054_g	BU/EG	0.36	0.67	0	0	-	-	-	-	gi|302691554|ref|XP_003035456.1|/3.24115e-12/hypothetical protein SCHCODRAFT_232931 [Schizophyllum commune H4-8]
GME5335_g	BU/EG	2.32	2.51	0	0	-	-	-	-	-
GME1293_g	BU/EG	0.36	0.5	0	0	-	-	-	-	gi|390598850|gb|EIN08247.1|/1.6756e-47/ACN9-domain-containing protein [Punctularia strigosozonata HHB-11173 SS5]
GME7343_g	BU/EG	0.36	0.67	0	0	-	-	-	-	gi|170087548|ref|XP_001874997.1|/3.99462e-50/predicted protein [Laccaria bicolor S238N-H82]
GME4283_g	BU/EG	1.25	1.51	0	0	-	-	GO:0046872//metal ion binding	-	gi|336368236|gb|EGN96579.1|/0/hypothetical protein SERLA73DRAFT_93073 [Serpula lacrymans var. lacrymans S7.3]
GME9394_g	BU/EG	1.07	0.33	0	0	-	-	-	-	-
GME1176_g	BU/EG	0.71	0.5	0	0	-	-	-	-	gi|169865143|ref|XP_001839175.1|/1.94477e-17/hypothetical protein CC1G_07890 [Coprinopsis cinerea okayama7#130]
GME3575_g	BU/EG	0.89	0.33	0	0	-	-	GO:0015926//glucosidase activity	GO:0005975//carbohydrate metabolic process	gi|302688725|ref|XP_003034042.1|/0/glycoside hydrolase family 15 protein [Schizophyllum commune H4-8]
GME1316_g	BU/EG	0.71	0.5	0	0	-	-	-	-	-
GME9445_g	BU/EG	0.36	0.67	0	0	ko01100//Metabolic pathways;ko00520//Amino sugar and nucleotide sugar metabolism;ko00500//Starch and sucrose metabolism;ko01110//Biosynthesis of secondary metabolites	-	GO:0016787//hydrolase activity	GO:0005975//carbohydrate metabolic process	gi|402225605|gb|EJU05666.1|/0/glycoside hydrolase [Dacryopinax sp. DJM-731 SS1]
GME893_g	BU/EG	0.71	1.51	0	0	ko04976//Bile secretion;ko00980//Metabolism of xenobiotics by cytochrome P450	-	GO:0016803	-	gi|299751159|ref|XP_001830097.2|/6.27361e-137/epoxide hydrolase domain-containing protein [Coprinopsis cinerea okayama7#130]
GME9874_g	BU/EG	0.71	0.84	0	0	-	-	-	-	gi|169846832|ref|XP_001830130.1|/3.55596e-47/hypothetical protein CC1G_04563 [Coprinopsis cinerea okayama7#130]
GME5733_g	BU/EG	1.25	0.67	0	0	-	-	-	-	gi|238613584|ref|XP_002398477.1|/5.11118e-06/hypothetical protein MPER_00923 [Moniliophthora perniciosa FA553]
GME3718_g	BU/EG	0.36	0.5	0	0	-	-	GO:0004553//hydrolase activity, hydrolyzing O-glycosyl compounds;GO:0005488//binding	GO:0044238//primary metabolic process	gi|9796014|emb|CAC03463.1|/6.37589e-107/putative xylanase [Agaricus bisporus]
GME5778_g	BU/EG	0.36	0.5	0	0	-	-	-	-	-
GME2132_g	BU/EG	0.36	0.33	0	0	-	-	-	-	gi|170089331|ref|XP_001875888.1|/4.02257e-121/predicted protein [Laccaria bicolor S238N-H82]
GME6036_g	BU/EG	0.71	1.51	0	0	-	-	-	-	gi|170118668|ref|XP_001890508.1|/2.23484e-08/predicted protein [Laccaria bicolor S238N-H82]
GME1880_g	BU/EG	0.71	0.67	0	0	-	-	-	-	gi|170089043|ref|XP_001875744.1|/1.18211e-56/predicted protein [Laccaria bicolor S238N-H82]
GME1002_g	BU/EG	0.71	1.34	0	0	-	-	-	-	gi|170093227|ref|XP_001877835.1|/0/predicted protein [Laccaria bicolor S238N-H82]
GME371_g	BU/EG	1.07	0.5	0	0	-	-	-	-	gi|170087790|ref|XP_001875118.1|/2.69376e-16/predicted protein [Laccaria bicolor S238N-H82]
GME7712_g	BU/EG	0.53	0.67	0	0	-	-	-	-	-
GME2477_g	BU/EG	2.85	2.68	0	0	-	-	-	-	gi|336387635|gb|EGO28780.1|/6.30669e-06/hypothetical protein SERLADRAFT_434679 [Serpula lacrymans var. lacrymans S7.9]
GME12046_g	BU/EG	0.71	0.5	0	0	-	-	-	-	gi|170113984|ref|XP_001888190.1|/4.48846e-18/predicted protein [Laccaria bicolor S238N-H82]
GME11514_g	BU/EG	0.36	0.67	0	0	-	-	-	-	gi|395334170|gb|EJF66546.1|/3.24652e-133/hypothetical protein DICSQDRAFT_75339 [Dichomitus squalens LYAD-421 SS1]
GME1737_g	BU/EG	0.71	1.17	0	0	-	-	-	-	-
GME509_g	BU/EG	0.53	1	0	0	-	-	-	-	gi|170091482|ref|XP_001876963.1|/7.72092e-83/predicted protein [Laccaria bicolor S238N-H82]
GME5051_g	BU/EG	0.71	0.5	0	0	-	-	-	-	gi|342879913|gb|EGU81145.1|/2.92327e-15/hypothetical protein FOXB_08295 [Fusarium oxysporum Fo5176]
GME10755_g	BU/EG	16.75	23.92	0	0	-	-	-	-	gi|169865878|ref|XP_001839536.1|/4.91314e-10/hypothetical protein CC1G_08915 [Coprinopsis cinerea okayama7#130]
GME2497_g	BU/EG	0.53	0.33	0	0	-	-	-	-	gi|392558738|gb|EIW51924.1|/3.62085e-11/hypothetical protein TRAVEDRAFT_40757 [Trametes versicolor FP-101664 SS1]
GME3311_g	BU/EG	0.36	1	0	0	-	-	-	-	gi|37529673|gb|AAQ92757.1|/4.47373e-59/volvatoxin A2 precursor [Volvariella volvacea]
GME3345_g	BU/EG	0.53	0.33	0	0	-	-	-	-	gi|238593299|ref|XP_002393156.1|/5.35131e-24/hypothetical protein MPER_07166 [Moniliophthora perniciosa FA553]
GME587_g	BU/EG	1.25	0.5	0	0	-	-	-	-	gi|302697209|ref|XP_003038283.1|/1.09157e-64/expressed protein [Schizophyllum commune H4-8]
GME6309_g	BU/EG	0.53	1	0	0	ko00930//Caprolactam degradation;ko01120//Microbial metabolism in diverse environments;ko00982//Drug metabolism - cytochrome P450;ko01120//Microbial metabolism in diverse environments;ko00680//Methane metabolism;ko01100//Metabolic pathways;ko00052//Galactose metabolism;ko00670//One carbon pool by folate;ko00630//Glyoxylate and dicarboxylate metabolism;ko00520//Amino sugar and nucleotide sugar met…	-	-	-	gi|336371804|gb|EGO00144.1|/8.09948e-163/hypothetical protein SERLA73DRAFT_53324 [Serpula lacrymans var. lacrymans S7.3]
GME3852_g	BU/EG	1.07	0.5	0	0	-	-	GO:0016787//hydrolase activity	-	gi|336374719|gb|EGO03056.1|/2.46272e-129/hypothetical protein SERLA73DRAFT_176576 [Serpula lacrymans var. lacrymans S7.3]
GME2130_g	BU/EG	1.6	2.68	0	0	ko04340//Hedgehog signaling pathway;ko03008//Ribosome biogenesis in eukaryotes	-	GO:0016301//kinase activity;GO:0032559	GO:0006464//cellular protein modification process	gi|169858043|ref|XP_001835668.1|/1.49641e-155/CK1/CK1 protein kinase [Coprinopsis cinerea okayama7#130]
GME6135_g	BU/EG	1.6	1.84	0	0	-	-	-	-	gi|299750295|ref|XP_001836661.2|/1.78173e-77/monocarboxylate permease [Coprinopsis cinerea okayama7#130]
GME6454_g	BU/EG	1.43	2.01	0	0	ko03430//Mismatch repair;ko03030//DNA replication;ko03420//Nucleotide excision repair	GO:0042575;GO:0043231//intracellular membrane-bounded organelle	GO:0003676//nucleic acid binding;GO:0016462//pyrophosphatase activity;GO:0032559;GO:0034061	GO:0006259//DNA metabolic process	gi|336383955|gb|EGO25103.1|/8.28823e-175/hypothetical protein SERLADRAFT_368530 [Serpula lacrymans var. lacrymans S7.9]
GME6457_g	BU/EG	1.25	0.67	0	0	-	-	-	-	gi|392587122|gb|EIW76457.1|/5.76867e-112/hypothetical protein CONPUDRAFT_168994 [Coniophora puteana RWD-64-598 SS2]
GME6852_g	BU/EG	0.53	1.17	0	0	-	-	-	-	gi|170096424|ref|XP_001879432.1|/0/predicted protein [Laccaria bicolor S238N-H82]
GME4043_g	BU/EG	0.53	0.67	0	0	-	-	-	-	-
GME5377_g	BU/EG	0.71	0.33	0	0	-	-	GO:0003676//nucleic acid binding	-	gi|403413311|emb|CCM00011.1|/8.15394e-69/predicted protein [Fibroporia radiculosa]
GME10418_g	BU/EG	0.36	0.5	0	0	-	-	-	-	gi|299747069|ref|XP_001839332.2|/9.66474e-18/hypothetical protein CC1G_08199 [Coprinopsis cinerea okayama7#130]
GME3818_g	BU/EG	0.53	0.84	0	0	ko05166//HTLV-I infection;ko04110//Cell cycle;ko04115//p53 signaling pathway;ko04111//Cell cycle - yeast;ko04111//Cell cycle - yeast	-	-	-	gi|393210512|gb|EJC97288.1|/5.19626e-58/kinase-like protein [Fomitiporia mediterranea MF3/22]
GME10877_g	BU/EG	0.36	0.33	0	0	-	-	-	-	gi|170109101|ref|XP_001885758.1|/1.9777e-52/predicted protein [Laccaria bicolor S238N-H82]
GME7746_g	BU/EG	1.25	0.33	0	0	-	-	-	-	gi|389742298|gb|EIM83485.1|/5.08764e-09/hypothetical protein STEHIDRAFT_123901 [Stereum hirsutum FP-91666 SS1]
GME5174_g	BU/EG	1.07	0.33	0	0	-	-	-	-	-
GME11069_g	BU/EG	0.36	0.5	0	0	-	-	-	-	gi|170084455|ref|XP_001873451.1|/4.77119e-29/predicted protein [Laccaria bicolor S238N-H82]
GME10214_g	BU/EG	0.36	0.33	0	0	-	-	-	-	gi|299744901|ref|XP_001831342.2|/2.0183e-110/hypothetical protein CC1G_00889 [Coprinopsis cinerea okayama7#130]
GME4058_g	BU/EG	0.36	0.67	0	0	ko02010//ABC transporters;ko02010//ABC transporters;ko04976//Bile secretion	-	-	-	gi|336380282|gb|EGO21436.1|/1.50225e-108/hypothetical protein SERLADRAFT_417697 [Serpula lacrymans var. lacrymans S7.9]
GME8826_g	BU/EG	1.6	3.68	0	0	-	-	-	-	gi|393235850|gb|EJD43402.1|/2.06701e-16/hypothetical protein AURDEDRAFT_167485 [Auricularia delicata TFB-10046 SS5]
GME10665_g	BU/EG	1.07	2.17	0	0	-	-	-	-	gi|170110612|ref|XP_001886511.1|/7.65337e-19/predicted protein [Laccaria bicolor S238N-H82]
GME766_g	BU/EG	0.53	0.5	0	0	-	-	-	-	gi|395325197|gb|EJF57623.1|/4.86773e-49/hypothetical protein DICSQDRAFT_91904 [Dichomitus squalens LYAD-421 SS1]
GME5239_g	BU/EG	0.71	0.67	0	0	ko00230//Purine metabolism	-	GO:0005488//binding;GO:0016817//hydrolase activity, acting on acid anhydrides;GO:0005215//transporter activity	-	gi|170109627|ref|XP_001886020.1|/0/predicted protein [Laccaria bicolor S238N-H82]
GME10922_g	BU/EG	0.36	0.33	0	0	-	-	-	-	-
GME7372_g	BU/EG	0.53	1	0	0	-	-	GO:0004553//hydrolase activity, hydrolyzing O-glycosyl compounds	GO:0005975//carbohydrate metabolic process	gi|32402371|gb|AAP81158.1|/9.37785e-108/xylanase [Volvariella volvacea]
GME8871_g	BU/EG	1.07	2.01	0	0	-	-	-	-	gi|170091112|ref|XP_001876778.1|/4.11104e-151/predicted protein [Laccaria bicolor S238N-H82]
GME604_g	BU/EG	1.78	1.34	0	0	ko01100//Metabolic pathways;ko00592//alpha-Linolenic acid metabolism;ko04141//Protein processing in endoplasmic reticulum	-	GO:0000166//nucleotide binding;GO:0003824//catalytic activity	-	gi|170099718|ref|XP_001881077.1|/1.32757e-161/predicted protein [Laccaria bicolor S238N-H82]
GME4004_g	BU/EG	1.43	1.67	0	0	-	-	-	-	gi|403416256|emb|CCM02956.1|/7.49544e-27/predicted protein [Fibroporia radiculosa]
GME3945_g	BU/EG	0.71	1.17	0	0	-	-	GO:0016491//oxidoreductase activity;GO:0005506//iron ion binding	-	gi|169855683|ref|XP_001834508.1|/0/cytochrome P450 monooxygenase pc-1 [Coprinopsis cinerea okayama7#130]
GME2787_g	BU/EG	0.53	0.5	0	0	-	-	-	-	gi|170109372|ref|XP_001885893.1|/2.54797e-13/predicted protein [Laccaria bicolor S238N-H82]
GME4779_g	BU/EG	0.89	0.84	0	0	-	-	-	-	gi|299752437|ref|XP_001830925.2|/0/hypothetical protein CC1G_02376 [Coprinopsis cinerea okayama7#130]
GME11951_g	BU/EG	2.32	1.17	0	0	-	-	-	-	gi|170100415|ref|XP_001881425.1|/6.14565e-44/predicted protein [Laccaria bicolor S238N-H82]
GME6649_g	BU/EG	0.36	0.33	0	0	-	-	-	-	-
GME9444_g	BU/EG	1.07	3.18	0	0	ko01100//Metabolic pathways;ko00520//Amino sugar and nucleotide sugar metabolism;ko00500//Starch and sucrose metabolism;ko01110//Biosynthesis of secondary metabolites	-	GO:0016787//hydrolase activity	GO:0005975//carbohydrate metabolic process	gi|390600023|gb|EIN09418.1|/0/glycoside hydrolase [Punctularia strigosozonata HHB-11173 SS5]
GME11941_g	BU/EG	0.71	0.5	0	0	ko00624//Polycyclic aromatic hydrocarbon degradation;ko01100//Metabolic pathways;ko00627//Aminobenzoate degradation;ko00363//Bisphenol degradation;ko01110//Biosynthesis of secondary metabolites;ko00903//Limonene and pinene degradation;ko00945//Stilbenoid, diarylheptanoid and gingerol biosynthesis;ko01120//Microbial metabolism in diverse environments;ko00100//Steroid biosynthesis;ko01100//Metaboli…	-	-	-	gi|336365283|gb|EGN93634.1|/6.28069e-119/hypothetical protein SERLA73DRAFT_189361 [Serpula lacrymans var. lacrymans S7.3]
GME7029_g	BU/EG	0.71	1.34	0	0	-	-	GO:0017111//nucleoside-triphosphatase activity;GO:0032559	GO:0009207	gi|170118394|ref|XP_001890376.1|/0/predicted protein [Laccaria bicolor S238N-H82]
GME1674_g	BU/EG	0.36	0.33	0	0	-	-	-	-	-
GME10126_g	BU/EG	1.07	0.5	0	0	-	-	GO:0016787//hydrolase activity	GO:0044238//primary metabolic process	gi|114324587|gb|ABI63599.1|/4.8634e-127/acetyl xylan esterase [Volvariella volvacea]
GME7028_g	BU/EG	0.71	0.5	0	0	-	-	GO:0016791//phosphatase activity	-	gi|392587185|gb|EIW76520.1|/1.60378e-36/serine threonine protein phosphatase [Coniophora puteana RWD-64-598 SS2]
GME1748_g	BU/EG	0.71	0.67	0	0	-	-	-	-	gi|170100453|ref|XP_001881444.1|/1.36311e-46/predicted protein [Laccaria bicolor S238N-H82]
GME5269_g	BU/EG	0.53	0.33	0	0	ko04910//Insulin signaling pathway;ko01100//Metabolic pathways;ko04070//Phosphatidylinositol signaling system;ko00562//Inositol phosphate metabolism;ko04141//Protein processing in endoplasmic reticulum;ko01100//Metabolic pathways;ko00513//Various types of N-glycan biosynthesis;ko00510//N-Glycan biosynthesis	-	-	-	gi|336367167|gb|EGN95512.1|/0/hypothetical protein SERLA73DRAFT_113095 [Serpula lacrymans var. lacrymans S7.3]
GME9942_g	BU/EG	0.36	0.5	0	0	-	-	GO:0016787//hydrolase activity	-	gi|170117387|ref|XP_001889881.1|/0/carbohydrate esterase family 9 protein [Laccaria bicolor S238N-H82]
GME782_g	BU/EG	1.6	2.34	0	0	-	-	GO:0005488//binding;GO:0003824//catalytic activity	-	gi|242213745|ref|XP_002472699.1|/2.58718e-72/predicted protein [Postia placenta Mad-698-R]
GME10356_g	BU/EG	0.36	0.33	0	0	ko05130//Pathogenic Escherichia coli infection;ko04745//Phototransduction - fly;ko05164//Influenza A;ko05412//Arrhythmogenic right ventricular cardiomyopathy (ARVC);ko04971//Gastric acid secretion;ko04810//Regulation of actin cytoskeleton;ko05414//Dilated cardiomyopathy;ko05416//Viral myocarditis;ko04670//Leukocyte transendothelial migration;ko05410//Hypertrophic cardiomyopathy (HCM);ko04510//Foc…	GO:0043232	GO:0032559	-	gi|390594948|gb|EIN04356.1|/2.49103e-177/actin 2 [Punctularia strigosozonata HHB-11173 SS5]
GME9_g	BU/EG	0.36	2.01	0	0	-	-	-	-	gi|170097111|ref|XP_001879775.1|/5.7526e-165/predicted protein [Laccaria bicolor S238N-H82]
GME9235_g	BU/EG	0.89	1	0	0	-	-	-	-	gi|12862434|dbj|BAB32470.1|/2.26283e-105/Pol-like protein Pol-2 [Tricholoma matsutake]
GME4905_g	BU/EG	0.36	1.17	0	0	-	-	-	-	gi|299745686|ref|XP_001831878.2|/1.16083e-61/hypothetical protein CC1G_08395 [Coprinopsis cinerea okayama7#130]
GME11045_g	BU/EG	0.89	2.51	0	0	-	-	-	-	gi|395325381|gb|EJF57804.1|/2.15317e-11/hypothetical protein DICSQDRAFT_68489 [Dichomitus squalens LYAD-421 SS1]
GME5145_g	BU/EG	0.36	0.5	0	0	ko01100//Metabolic pathways;ko00270//Cysteine and methionine metabolism;ko00290//Valine, leucine and isoleucine biosynthesis;ko01110//Biosynthesis of secondary metabolites;ko00260//Glycine, serine and threonine metabolism	-	-	-	gi|296425373|ref|XP_002842216.1|/4.179e-67/hypothetical protein [Tuber melanosporum Mel28]
GME8884_g	BU/EG	0.71	0.33	0	0	-	-	-	GO:0019725//cellular homeostasis	gi|169865504|ref|XP_001839351.1|/5.11349e-84/h-sco1 [Coprinopsis cinerea okayama7#130]
GME1386_g	BU/EG	1.07	2.34	0	0	-	-	-	-	gi|170113984|ref|XP_001888190.1|/6.71198e-45/predicted protein [Laccaria bicolor S238N-H82]
GME2179_g	BU/EG	1.07	1.17	0	0	-	-	-	-	gi|336367311|gb|EGN95656.1|/1.5677e-11/hypothetical protein SERLA73DRAFT_162449 [Serpula lacrymans var. lacrymans S7.3]
GME11323_g	BU/EG	0.36	1.17	0	0	-	-	-	-	gi|170083923|ref|XP_001873185.1|/7.78286e-110/predicted protein [Laccaria bicolor S238N-H82]
GME3622_g	BU/EG	0.36	2.01	0	0	-	-	-	-	-
GME9211_g	BU/EG	1.07	2.68	0	0	-	-	-	-	gi|392568414|gb|EIW61588.1|/6.33183e-73/hypothetical protein TRAVEDRAFT_69910 [Trametes versicolor FP-101664 SS1]
GME10358_g	BU/EG	1.07	1.51	0	0	-	-	-	-	gi|302696109|ref|XP_003037733.1|/3.39991e-27/hypothetical protein SCHCODRAFT_254840 [Schizophyllum commune H4-8]
GME9093_g	BU/EG	2.32	1.17	0	0	ko00620//Pyruvate metabolism;ko01100//Metabolic pathways;ko00500//Starch and sucrose metabolism	-	-	-	gi|389740910|gb|EIM82100.1|/1.46832e-91/glycoside hydrolase family 16 protein, partial [Stereum hirsutum FP-91666 SS1]
GME6247_g	BU/EG	0.36	0.84	0	0	ko04110//Cell cycle;ko03030//DNA replication;ko04111//Cell cycle - yeast;ko04113//Meiosis - yeast	-	GO:0003676//nucleic acid binding;GO:0032559	GO:0006259//DNA metabolic process	gi|299746182|ref|XP_001837798.2|/0/cell division control protein 54 [Coprinopsis cinerea okayama7#130]
GME2897_g	BU/EG	1.25	1.34	0	0	ko04141//Protein processing in endoplasmic reticulum;ko05020//Prion diseases;ko03060//Protein export;ko04612//Antigen processing and presentation	-	GO:0000166//nucleotide binding	-	gi|170097613|ref|XP_001880026.1|/0/predicted protein [Laccaria bicolor S238N-H82]
GME9604_g	BU/EG	0.71	1.84	0	0	ko03050//Proteasome	GO:0043231//intracellular membrane-bounded organelle;GO:0000502//proteasome complex	GO:0004175//endopeptidase activity	GO:0006508//proteolysis	gi|170085607|ref|XP_001874027.1|/1.46014e-93/20S proteasome subunit beta 3 [Laccaria bicolor S238N-H82]
GME10595_g	BU/EG	0.36	0.5	0	0	-	-	-	-	gi|336375525|gb|EGO03861.1|/4.32103e-45/hypothetical protein SERLA73DRAFT_175544 [Serpula lacrymans var. lacrymans S7.3]
GME8295_g	BU/EG	0.53	1.34	0	0	-	-	-	-	gi|170090636|ref|XP_001876540.1|/5.94689e-77/predicted protein [Laccaria bicolor S238N-H82]
GME12044_g	BU/EG	0.89	1.51	0	0	-	-	-	-	-
GME9814_g	BU/EG	0.53	0.84	0	0	-	-	-	-	gi|238582519|ref|XP_002389957.1|/1.2971e-20/hypothetical protein MPER_10847 [Moniliophthora perniciosa FA553]
GME4075_g	BU/EG	0.71	0.84	0	0	ko02010//ABC transporters;ko02010//ABC transporters;ko04976//Bile secretion	-	-	-	gi|336380282|gb|EGO21436.1|/2.57156e-84/hypothetical protein SERLADRAFT_417697 [Serpula lacrymans var. lacrymans S7.9]
GME2301_g	BU/EG	1.25	0.67	0	0	-	-	-	-	gi|395334010|gb|EJF66386.1|/1.67378e-81/PLC-like phosphodiesterase [Dichomitus squalens LYAD-421 SS1]
GME4140_g	BU/EG	1.6	0.84	0	0	-	-	-	-	gi|242217689|ref|XP_002474642.1|/1.69019e-10/predicted protein [Postia placenta Mad-698-R]
GME8959_g	BU/EG	0.89	0.33	0	0	-	-	-	-	gi|392597017|gb|EIW86339.1|/4.4573e-27/hypothetical protein CONPUDRAFT_114525 [Coniophora puteana RWD-64-598 SS2]
GME1286_g	BU/EG	0.36	2.51	0	0	-	-	-	-	gi|336370858|gb|EGN99198.1|/5.6645e-36/hypothetical protein SERLA73DRAFT_182077 [Serpula lacrymans var. lacrymans S7.3]
GME7124_g	BU/EG	0.71	0.33	0	0	-	-	-	-	-
GME10384_g	BU/EG	0.89	0.84	0	0	-	-	-	-	gi|170097421|ref|XP_001879930.1|/1.07876e-61/predicted protein [Laccaria bicolor S238N-H82]
GME303_g	BU/EG	1.25	0.5	0	0	ko01100//Metabolic pathways;ko00250//Alanine, aspartate and glutamate metabolism;ko00240//Pyrimidine metabolism	-	-	-	gi|389745581|gb|EIM86762.1|/8.69499e-36/MFS general substrate transporter [Stereum hirsutum FP-91666 SS1]
GME5270_g	BU/EG	0.36	0.33	0	0	-	-	-	-	gi|336367165|gb|EGN95510.1|/0/hypothetical protein SERLA73DRAFT_186554 [Serpula lacrymans var. lacrymans S7.3]
GME10078_g	BU/EG	0.36	0.67	0	0	ko01100//Metabolic pathways;ko00250//Alanine, aspartate and glutamate metabolism;ko00240//Pyrimidine metabolism;ko04146//Peroxisome	-	-	-	gi|170093391|ref|XP_001877917.1|/1.84463e-45/predicted protein [Laccaria bicolor S238N-H82]
GME10634_g	BU/EG	2.85	2.51	0	0	ko03010//Ribosome	GO:0030529//ribonucleoprotein complex	GO:0005198//structural molecule activity	GO:0010467//gene expression	gi|389741688|gb|EIM82876.1|/2.75891e-135/40S ribosomal protein S2 [Stereum hirsutum FP-91666 SS1]
GME5990_g	BU/EG	1.43	0.5	0	0	ko02020//Two-component system;ko01100//Metabolic pathways;ko00591//Linoleic acid metabolism;ko00051//Fructose and mannose metabolism;ko00362//Benzoate degradation;ko00363//Bisphenol degradation;ko01110//Biosynthesis of secondary metabolites;ko00903//Limonene and pinene degradation;ko00650//Butanoate metabolism;ko00626//Naphthalene degradation;ko00625//Chloroalkane and chloroalkene degradation;ko0…	-	GO:0003824//catalytic activity	GO:0008152//metabolic process	gi|392585159|gb|EIW74500.1|/7.09935e-128/Aldo keto reductase [Coniophora puteana RWD-64-598 SS2]
GME6231_g	BU/EG	0.36	0.67	0	0	-	-	-	-	gi|170095601|ref|XP_001879021.1|/4.07594e-49/predicted protein [Laccaria bicolor S238N-H82]
GME10142_g	BU/EG	0.89	1.17	0	0	-	-	-	-	gi|170093241|ref|XP_001877842.1|/8.0245e-29/predicted protein [Laccaria bicolor S238N-H82]
GME4429_g	BU/EG	0.89	1	0	0	-	-	-	-	-
GME8519_g	BU/EG	0.36	1.17	0	0	ko04110//Cell cycle;ko04111//Cell cycle - yeast;ko04113//Meiosis - yeast	-	-	-	gi|170091816|ref|XP_001877130.1|/8.99936e-118/predicted protein [Laccaria bicolor S238N-H82]
GME10624_g	BU/EG	0.89	0.67	0	0	-	-	-	-	gi|169848391|ref|XP_001830903.1|/3.82339e-92/hypothetical protein CC1G_02354 [Coprinopsis cinerea okayama7#130]
GME8699_g	BU/EG	0.36	0.67	0	0	-	-	-	-	gi|336386243|gb|EGO27389.1|/2.57645e-136/hypothetical protein SERLADRAFT_435169 [Serpula lacrymans var. lacrymans S7.9]
GME7471_g	BU/EG	1.43	1.67	0	0	ko03010//Ribosome	GO:0030529//ribonucleoprotein complex	GO:0005198//structural molecule activity	GO:0010467//gene expression	gi|170109187|ref|XP_001885801.1|/2.41265e-79/40S ribosomal protein S13 [Laccaria bicolor S238N-H82]
GME6987_g	BU/EG	0.71	0.84	0	0	-	-	-	-	gi|170113984|ref|XP_001888190.1|/4.56424e-65/predicted protein [Laccaria bicolor S238N-H82]
GME4151_g	BU/EG	0.36	0.67	0	0	ko02020//Two-component system;ko01100//Metabolic pathways;ko00790//Folate biosynthesis;ko00627//Aminobenzoate degradation;ko01120//Microbial metabolism in diverse environments;ko01100//Metabolic pathways;ko00520//Amino sugar and nucleotide sugar metabolism;ko00500//Starch and sucrose metabolism;ko01110//Biosynthesis of secondary metabolites	-	GO:0016798//hydrolase activity, acting on glycosyl bonds	GO:0008152//metabolic process	gi|392565605|gb|EIW58782.1|/2.10913e-105/glycoside hydrolase family 18 protein [Trametes versicolor FP-101664 SS1]
GME7794_g	BU/EG	0.36	0.84	0	0	-	-	-	-	gi|302690868|ref|XP_003035113.1|/1.16009e-73/hypothetical protein SCHCODRAFT_10469 [Schizophyllum commune H4-8]
GME7815_g	BU/EG	0.36	0.33	0	0	-	-	-	-	gi|170094014|ref|XP_001878228.1|/3.40394e-56/predicted protein [Laccaria bicolor S238N-H82]
GME7126_g	BU/EG	0.89	0.84	0	0	-	-	-	-	-
GME10705_g	BU/EG	0.36	1.34	0	0	ko01100//Metabolic pathways;ko04970//Salivary secretion;ko04972//Pancreatic secretion;ko00500//Starch and sucrose metabolism;ko00860//Porphyrin and chlorophyll metabolism;ko04973//Carbohydrate digestion and absorption	-	GO:0003824//catalytic activity	-	gi|392562655|gb|EIW55835.1|/0/glycoside hydrolase [Trametes versicolor FP-101664 SS1]
GME2224_g	BU/EG	0.36	0.84	0	0	-	-	-	-	gi|170091164|ref|XP_001876804.1|/1.01824e-70/predicted protein [Laccaria bicolor S238N-H82]
GME5476_g	BU/EG	0.53	0.33	0	0	-	-	-	-	-
GME10598_g	BU/EG	0.36	0.67	0	0	ko01100//Metabolic pathways;ko00563//Glycosylphosphatidylinositol(GPI)-anchor biosynthesis	-	-	-	gi|170100118|ref|XP_001881277.1|/3.20197e-41/carbohydrate esterase family 14 protein [Laccaria bicolor S238N-H82]
GME11950_g	BU/EG	0.36	0.84	0	0	-	-	-	-	-
GME7749_g	BU/EG	0.89	0.84	0	0	-	-	-	-	gi|170093932|ref|XP_001878187.1|/3.79959e-54/predicted protein [Laccaria bicolor S238N-H82]
GME9329_g	BU/EG	0.36	4.01	0	0	-	-	-	-	gi|390599073|gb|EIN08470.1|/8.38198e-136/MFS general substrate transporter [Punctularia strigosozonata HHB-11173 SS5]
GME2659_g	BU/EG	1.96	1.84	0	0	-	-	-	-	gi|336381931|gb|EGO23082.1|/7.00236e-52/hypothetical protein SERLADRAFT_471781 [Serpula lacrymans var. lacrymans S7.9]
GME6157_g	BU/EG	0.36	0.84	0	0	-	-	-	-	gi|390605280|gb|EIN14671.1|/1.71712e-14/hypothetical protein PUNSTDRAFT_118091 [Punctularia strigosozonata HHB-11173 SS5]
GME4858_g	BU/EG	0.36	0.33	0	0	-	-	-	-	gi|403411675|emb|CCL98375.1|/4.1759e-62/predicted protein [Fibroporia radiculosa]
GME7804_g	BU/EG	1.25	2.17	0	0	-	-	-	-	gi|302692546|ref|XP_003035952.1|/8.13536e-66/hypothetical protein SCHCODRAFT_256072 [Schizophyllum commune H4-8]
GME3851_g	BU/EG	0.71	0.33	0	0	-	-	-	-	-
GME5455_g	BU/EG	0.89	3.35	0	0	-	-	-	-	gi|170087384|ref|XP_001874915.1|/5.14707e-162/predicted protein [Laccaria bicolor S238N-H82]
GME4526_g	BU/EG	0.89	1	0	0	-	-	-	-	gi|299741166|ref|XP_001834273.2|/1.52048e-87/hypothetical protein CC1G_12352 [Coprinopsis cinerea okayama7#130]
GME7665_g	BU/EG	0.36	1.51	0	0	-	-	-	-	gi|170117577|ref|XP_001889975.1|/2.08763e-11/predicted protein [Laccaria bicolor S238N-H82]
GME1968_g	BU/EG	0.89	0.33	0	0	ko04141//Protein processing in endoplasmic reticulum;ko04120//Ubiquitin mediated proteolysis	GO:0043234//protein complex	GO:0004842//ubiquitin-protein ligase activity	GO:0019941//modification-dependent protein catabolic process;GO:0032446//protein modification by small protein conjugation	gi|170090133|ref|XP_001876289.1|/0/predicted protein [Laccaria bicolor S238N-H82]
GME5022_g	BU/EG	0.53	0.84	0	0	-	-	-	-	gi|170108854|ref|XP_001885635.1|/1.4446e-86/predicted protein [Laccaria bicolor S238N-H82]
GME11453_g	BU/EG	1.25	0.67	0	0	ko03410//Base excision repair	-	-	GO:0006281//DNA repair	gi|299745822|ref|XP_001841324.2|/1.98961e-16/hypothetical protein CC1G_11852 [Coprinopsis cinerea okayama7#130]
GME5715_g	BU/EG	0.36	0.67	0	0	ko04142//Lysosome;ko05152//Tuberculosis	-	GO:0008233//peptidase activity	-	gi|170096574|ref|XP_001879507.1|/1.11711e-95/predicted protein [Laccaria bicolor S238N-H82]
GME4022_g	BU/EG	0.36	0.33	0	0	-	-	-	-	-
GME230_g	BU/EG	1.25	0.67	0	0	-	-	-	-	gi|238577195|ref|XP_002388308.1|/1.95679e-59/hypothetical protein MPER_12689 [Moniliophthora perniciosa FA553]
GME7838_g	BU/EG	3.39	2.84	0	0	-	-	-	-	gi|389748729|gb|EIM89906.1|/9.34482e-92/hypothetical protein STEHIDRAFT_153743 [Stereum hirsutum FP-91666 SS1]
GME11741_g	BU/EG	0.36	0.33	0	0	-	-	-	-	gi|390604083|gb|EIN13474.1|/7.48993e-10/hypothetical protein PUNSTDRAFT_58938, partial [Punctularia strigosozonata HHB-11173 SS5]
GME11037_g	BU/EG	0.36	0.67	0	0	-	GO:0044421//extracellular region part	GO:0046914//transition metal ion binding;GO:0004175//endopeptidase activity	-	gi|169857374|ref|XP_001835337.1|/0/metalloprotease [Coprinopsis cinerea okayama7#130]
GME2273_g	BU/EG	0.53	0.33	0	0	-	-	-	-	gi|170097423|ref|XP_001879931.1|/1.12553e-20/predicted protein [Laccaria bicolor S238N-H82]
GME8990_g	BU/EG	0.36	0.5	0	0	-	-	-	-	gi|403415159|emb|CCM01859.1|/2.75981e-79/predicted protein [Fibroporia radiculosa]
GME11573_g	BU/EG	0.53	0.33	0	0	-	-	-	-	gi|392597108|gb|EIW86430.1|/2.95021e-53/hypothetical protein CONPUDRAFT_140992 [Coniophora puteana RWD-64-598 SS2]
GME2788_g	BU/EG	0.36	0.33	0	0	-	-	-	-	gi|169867296|ref|XP_001840229.1|/1.34858e-15/hypothetical protein CC1G_02692 [Coprinopsis cinerea okayama7#130]
GME7596_g	BU/EG	174.61	0.67	0	0	ko01100//Metabolic pathways;ko00310//Lysine degradation;ko00780//Biotin metabolism	-	-	-	gi|390598089|gb|EIN07488.1|/3.21448e-81/class I glutamine amidotransferase-like protein [Punctularia strigosozonata HHB-11173 SS5]
GME7325_g	BU/EG	0.53	0.67	0	0	-	-	GO:0046872//metal ion binding	-	gi|170107107|ref|XP_001884764.1|/0/predicted protein [Laccaria bicolor S238N-H82]
GME4264_g	BU/EG	1.07	0.67	0	0	-	-	-	-	gi|392565552|gb|EIW58729.1|/1.58755e-18/DnaJ-domain-containing protein [Trametes versicolor FP-101664 SS1]
GME1031_g	BU/EG	1.25	0.5	0	0	-	-	-	-	gi|302675615|ref|XP_003027491.1|/4.40038e-23/hypothetical protein SCHCODRAFT_113151 [Schizophyllum commune H4-8]
GME5637_g	BU/EG	0.36	0.33	0	0	-	-	-	-	gi|170094945|ref|XP_001878693.1|/3.98356e-67/predicted protein [Laccaria bicolor S238N-H82]
GME3696_g	BU/EG	0.53	0.33	0	0	-	GO:0005622//intracellular	GO:0003677//DNA binding	-	gi|392584933|gb|EIW74275.1|/1.60356e-33/histone-fold-containing protein [Coniophora puteana RWD-64-598 SS2]
GME7660_g	BU/EG	0.36	2.34	0	0	-	-	-	-	-
GME134_g	BU/EG	1.43	2.51	0	0	-	-	-	-	gi|299756879|ref|XP_001829640.2|/8.47846e-18/hypothetical protein CC1G_08795 [Coprinopsis cinerea okayama7#130]
GME6664_g	BU/EG	1.43	2.17	0	0	-	-	-	-	gi|170096965|ref|XP_001879702.1|/1.07371e-84/predicted protein [Laccaria bicolor S238N-H82]
GME10879_g	BU/EG	0.36	0.5	0	0	-	-	-	-	gi|170109101|ref|XP_001885758.1|/1.3808e-55/predicted protein [Laccaria bicolor S238N-H82]
GME732_g	BU/EG	1.6	0.33	0	0	ko04912//GnRH signaling pathway;ko04010//MAPK signaling pathway;ko04540//Gap junction;ko04011//MAPK signaling pathway - yeast;ko04722//Neurotrophin signaling pathway	-	GO:0004702//receptor signaling protein serine/threonine kinase activity;GO:0032559	GO:0006464//cellular protein modification process	gi|336385356|gb|EGO26503.1|/0/hypothetical protein SERLADRAFT_463646 [Serpula lacrymans var. lacrymans S7.9]
GME7382_g	BU/EG	0.36	0.84	0	0	-	-	-	-	gi|170100455|ref|XP_001881445.1|/1.00775e-13/predicted protein [Laccaria bicolor S238N-H82]
GME1064_g	BU/EG	0.53	1.34	0	0	-	-	-	-	gi|170087978|ref|XP_001875212.1|/5.41122e-134/predicted protein [Laccaria bicolor S238N-H82]
GME2519_g	BU/EG	0.36	0.33	0	0	-	-	-	-	-
GME5635_g	BU/EG	1.25	0.5	0	0	-	-	-	-	gi|170115339|ref|XP_001888864.1|/2.72817e-80/predicted protein [Laccaria bicolor S238N-H82]
GME9595_g	BU/EG	0.71	0.5	0	0	ko03015//mRNA surveillance pathway;ko03008//Ribosome biogenesis in eukaryotes;ko05164//Influenza A;ko03013//RNA transport	GO:0044464//cell part	-	GO:0051234//establishment of localization	gi|170084423|ref|XP_001873435.1|/2.08858e-72/predicted protein [Laccaria bicolor S238N-H82]
GME7594_g	BU/EG	0.53	1	0	0	-	-	-	-	gi|170095922|ref|XP_001879181.1|/1.68969e-25/predicted protein [Laccaria bicolor S238N-H82]
GME1892_g	BU/EG	0.36	0.33	0	0	ko03040//Spliceosome	-	GO:0032559;GO:0042623//ATPase activity, coupled	-	gi|299743639|ref|XP_001835890.2|/0/pre-mRNA splicing factor [Coprinopsis cinerea okayama7#130]
GME1858_g	BU/EG	0.53	0.33	0	0	-	-	-	-	gi|390594138|gb|EIN03552.1|/5.10387e-145/hypothetical protein PUNSTDRAFT_146990 [Punctularia strigosozonata HHB-11173 SS5]
GME6509_g	BU/EG	0.53	2.01	0	0	-	-	-	-	gi|336369464|gb|EGN97805.1|/3.83933e-54/hypothetical protein SERLA73DRAFT_90914 [Serpula lacrymans var. lacrymans S7.3]
GME228_g	BU/EG	0.36	0.67	0	0	ko00300//Lysine biosynthesis;ko01100//Metabolic pathways;ko00310//Lysine degradation;ko01110//Biosynthesis of secondary metabolites	-	-	-	gi|336379219|gb|EGO20375.1|/0/putative aminoadipate reductase [Serpula lacrymans var. lacrymans S7.9]
GME505_g	BU/EG	0.36	1.51	0	0	-	-	-	-	gi|170101434|ref|XP_001881934.1|/9.38302e-32/predicted protein [Laccaria bicolor S238N-H82]
GME1406_g	BU/EG	1.07	1.34	0	0	-	-	-	-	-
GME4205_g	BU/EG	1.78	1	0	0	-	-	-	GO:0016070//RNA metabolic process	gi|336368400|gb|EGN96743.1|/3.80633e-84/hypothetical protein SERLA73DRAFT_140490 [Serpula lacrymans var. lacrymans S7.3]
GME9797_g	BU/EG	1.07	0.67	0	0	ko04011//MAPK signaling pathway - yeast	-	-	-	gi|392568614|gb|EIW61788.1|/1.82193e-35/hypothetical protein TRAVEDRAFT_118135 [Trametes versicolor FP-101664 SS1]
GME11676_g	BU/EG	1.43	1	0	0	-	-	-	-	gi|403414735|emb|CCM01435.1|/1.83047e-20/predicted protein [Fibroporia radiculosa]
GME7726_g	BU/EG	0.71	0.5	0	0	-	-	-	-	gi|170094656|ref|XP_001878549.1|/3.47949e-19/TonB box-containing protein [Laccaria bicolor S238N-H82]
GME1821_g	BU/EG	1.07	0.33	0	0	-	-	-	-	-
GME5010_g	BU/EG	0.71	0.84	0	0	-	-	GO:0046872//metal ion binding;GO:0003676//nucleic acid binding	-	gi|170096925|ref|XP_001879682.1|/0/SNF2 family DNA-dependent ATPase [Laccaria bicolor S238N-H82]
GME2013_g	BU/EG	0.36	0.67	0	0	ko04972//Pancreatic secretion	-	-	-	gi|389744771|gb|EIM85953.1|/2.49367e-120/NCA2-domain-containing protein [Stereum hirsutum FP-91666 SS1]
GME9305_g	BU/EG	1.25	0.5	0	0	-	-	GO:0000166//nucleotide binding;GO:0003824//catalytic activity	-	gi|393219955|gb|EJD05441.1|/2.12959e-82/flavo protein WrbA [Fomitiporia mediterranea MF3/22]
GME7099_g	BU/EG	0.71	0.84	0	0	ko01100//Metabolic pathways;ko00780//Biotin metabolism	-	-	-	gi|392560389|gb|EIW53572.1|/3.18897e-144/class II aaRS and biotin synthetase [Trametes versicolor FP-101664 SS1]
GME9983_g	BU/EG	0.53	0.5	0	0	ko04113//Meiosis - yeast	-	-	-	gi|170096338|ref|XP_001879389.1|/1.42024e-139/predicted protein [Laccaria bicolor S238N-H82]
GME5298_g	BU/EG	0.89	0.84	0	0	-	-	-	-	-
GME1040_g	BU/EG	2.14	1	0	0	-	-	-	-	gi|302693775|ref|XP_003036566.1|/3.30642e-18/hypothetical protein SCHCODRAFT_102630 [Schizophyllum commune H4-8]
GME38_g	BU/EG	0.36	0.33	0	0	-	-	-	-	gi|189209021|ref|XP_001940843.1|/2.31444e-25/vegetative incompatibility protein HET-E-1 [Pyrenophora tritici-repentis Pt-1C-BFP]
GME8225_g	BU/EG	0.89	0.5	0	0	-	-	-	-	gi|170104735|ref|XP_001883581.1|/5.48417e-49/predicted protein [Laccaria bicolor S238N-H82]
GME5144_g	BU/EG	6.06	7.19	0	0	-	-	-	-	-
GME6737_g	BU/EG	0.36	0.33	0	0	-	-	-	-	gi|392565952|gb|EIW59128.1|/1.29513e-30/hypothetical protein TRAVEDRAFT_121959 [Trametes versicolor FP-101664 SS1]
GME6662_g	BU/EG	2.14	0.33	0	0	-	-	-	-	gi|299740774|ref|XP_001833987.2|/3.68999e-25/hypothetical protein CC1G_09401 [Coprinopsis cinerea okayama7#130]
GME1439_g	BU/EG	0.71	0.84	0	0	ko01100//Metabolic pathways;ko03010//Ribosome;ko00040//Pentose and glucuronate interconversions	GO:0030529//ribonucleoprotein complex	GO:0005198//structural molecule activity	GO:0010467//gene expression	gi|336375076|gb|EGO03412.1|/2.89048e-70/hypothetical protein SERLA73DRAFT_101499 [Serpula lacrymans var. lacrymans S7.3]
GME274_g	BU/EG	1.78	1.67	0	0	-	-	-	-	gi|169849033|ref|XP_001831220.1|/5.92316e-47/hypothetical protein CC1G_00767 [Coprinopsis cinerea okayama7#130]
GME9032_g	BU/EG	0.36	0.5	0	0	ko00260//Glycine, serine and threonine metabolism	-	-	-	gi|289655795|gb|ADD14021.1|/2.7423e-150/aryl-alcohol oxidase [Pleurotus eryngii]
GME1701_g	BU/EG	0.36	0.5	0	0	-	-	-	-	gi|390604553|gb|EIN13944.1|/9.74075e-55/hypothetical protein PUNSTDRAFT_117576 [Punctularia strigosozonata HHB-11173 SS5]
GME692_g	BU/EG	0.53	0.33	0	0	-	GO:0031224//intrinsic to membrane	-	-	gi|170097940|ref|XP_001880189.1|/2.24873e-79/predicted protein [Laccaria bicolor S238N-H82]
GME10969_g	BU/EG	1.78	1	0	0	-	-	-	-	-
GME388_g	BU/EG	0.71	1.51	0	0	-	-	GO:0008233//peptidase activity	-	gi|237868680|gb|ACR25273.1|/1.68717e-102/peptidase 1 [Pleurotus ostreatus]
GME5656_g	BU/EG	0.53	0.5	0	0	-	-	-	-	gi|170104222|ref|XP_001883325.1|/2.07479e-107/predicted protein [Laccaria bicolor S238N-H82]
GME9258_g	BU/EG	0.36	0.33	0	0	-	-	-	-	-
GME7068_g	BU/EG	1.43	0.5	0	0	-	-	-	-	gi|299748936|ref|XP_001840254.2|/1.9938e-35/NWD2 [Coprinopsis cinerea okayama7#130]
GME7448_g	BU/EG	0.71	1	0	0	ko01100//Metabolic pathways;ko00230//Purine metabolism;ko03020//RNA polymerase;ko00240//Pyrimidine metabolism	-	GO:0034062//RNA polymerase activity;GO:0046914//transition metal ion binding;GO:0003676//nucleic acid binding	GO:0010467//gene expression	gi|299755285|ref|XP_002912086.1|/8.95205e-48/DNA-directed RNA polymerase I kDa polypeptide [Coprinopsis cinerea okayama7#130]
GME11640_g	BU/EG	0.53	0.5	0	0	ko03040//Spliceosome;ko05168//Herpes simplex infection;ko03015//mRNA surveillance pathway	-	GO:0046914//transition metal ion binding	-	gi|392571790|gb|EIW64962.1|/5.43504e-47/hypothetical protein TRAVEDRAFT_55734 [Trametes versicolor FP-101664 SS1]
GME6195_g	BU/EG	0.71	0.67	0	0	ko04011//MAPK signaling pathway - yeast;ko04113//Meiosis - yeast	-	GO:0000166//nucleotide binding	-	gi|299746176|ref|XP_001837791.2|/5.54476e-139/heterotrimeric G protein alpha subunit [Coprinopsis cinerea okayama7#130]
GME7461_g	BU/EG	0.71	0.33	0	0	-	-	-	-	gi|390597712|gb|EIN07111.1|/6.77773e-11/hypothetical protein PUNSTDRAFT_135800 [Punctularia strigosozonata HHB-11173 SS5]
GME1357_g	BU/EG	0.36	2.17	0	0	-	-	-	-	-
GME7597_g	BU/EG	1.78	1.17	0	0	-	-	-	-	gi|299751127|ref|XP_001830074.2|/1.30082e-10/hypothetical protein CC1G_04507 [Coprinopsis cinerea okayama7#130]
GME4013_g	BU/EG	0.53	1.34	0	0	ko04010//MAPK signaling pathway	-	-	-	gi|392584696|gb|EIW74040.1|/3.10401e-40/TPR-like protein [Coniophora puteana RWD-64-598 SS2]
GME5393_g	BU/EG	0.53	1.67	0	0	ko03410//Base excision repair;ko03410//Base excision repair	GO:0044464//cell part	GO:0003676//nucleic acid binding;GO:0004518//nuclease activity	GO:0006259//DNA metabolic process	gi|392567192|gb|EIW60367.1|/1.05207e-120/hypothetical protein TRAVEDRAFT_45617 [Trametes versicolor FP-101664 SS1]
GME1088_g	BU/EG	1.25	3.01	0	0	ko01100//Metabolic pathways;ko00240//Pyrimidine metabolism;ko01100//Metabolic pathways;ko00040//Pentose and glucuronate interconversions	-	GO:0003824//catalytic activity	GO:0008152//metabolic process	gi|302691530|ref|XP_003035444.1|/1.39739e-107/hypothetical protein SCHCODRAFT_51754 [Schizophyllum commune H4-8]
GME3376_g	BU/EG	0.36	0.33	0	0	-	-	-	-	gi|302686244|ref|XP_003032802.1|/4.96274e-21/expressed protein [Schizophyllum commune H4-8]
GME10479_g	BU/EG	0.36	0.5	0	0	ko04122//Sulfur relay system	-	GO:0000166//nucleotide binding;GO:0003824//catalytic activity	-	gi|336370693|gb|EGN99033.1|/2.61975e-78/hypothetical protein SERLA73DRAFT_181808 [Serpula lacrymans var. lacrymans S7.3]
GME9111_g	BU/EG	0.71	0.67	0	0	-	-	GO:0016301//kinase activity	-	gi|170108848|ref|XP_001885632.1|/5.05104e-70/predicted protein [Laccaria bicolor S238N-H82]
GME1465_g	BU/EG	1.78	2.84	0	0	-	-	-	-	-
GME5232_g	BU/EG	1.07	0.5	0	0	-	-	GO:0016787//hydrolase activity	-	gi|141493223|gb|ABL98208.2|/1.31498e-73/serine protease [Hypsizygus marmoreus]
GME7721_g	BU/EG	0.36	0.33	0	0	-	-	-	-	gi|169856803|ref|XP_001835055.1|/2.16871e-80/GDSL lipase/acylhydrolase [Coprinopsis cinerea okayama7#130]
GME7094_g	BU/EG	0.71	1.84	0	0	-	-	-	-	gi|170094298|ref|XP_001878370.1|/5.75868e-13/predicted protein [Laccaria bicolor S238N-H82]
GME11146_g	BU/EG	1.43	0.67	0	0	ko04976//Bile secretion;ko00980//Metabolism of xenobiotics by cytochrome P450	-	-	-	gi|169851184|ref|XP_001832283.1|/1.08753e-88/hypothetical protein CC1G_02545 [Coprinopsis cinerea okayama7#130]
GME10697_g	BU/EG	0.36	0.5	0	0	ko02020//Two-component system;ko01100//Metabolic pathways;ko00627//Aminobenzoate degradation;ko00740//Riboflavin metabolism;ko00970//Aminoacyl-tRNA biosynthesis;ko00860//Porphyrin and chlorophyll metabolism;ko01120//Microbial metabolism in diverse environments;ko01110//Biosynthesis of secondary metabolites	-	GO:0016876//ligase activity, forming aminoacyl-tRNA and related compounds;GO:0000166//nucleotide binding	GO:0006412//translation;GO:0043039//tRNA aminoacylation	gi|336378491|gb|EGO19649.1|/1.88058e-173/hypothetical protein SERLADRAFT_453600 [Serpula lacrymans var. lacrymans S7.9]
GME11908_g	BU/EG	0.53	0.33	0	0	-	-	-	-	gi|340514356|gb|EGR44620.1|/8.63787e-13/predicted protein [Trichoderma reesei QM6a]
GME3981_g	BU/EG	1.43	0.84	0	0	-	-	-	-	gi|336381317|gb|EGO22469.1|/1.97021e-08/hypothetical protein SERLADRAFT_409958 [Serpula lacrymans var. lacrymans S7.9]
GME607_g	BU/EG	1.6	1.51	0	0	-	-	-	-	gi|170087764|ref|XP_001875105.1|/8.4838e-57/predicted protein [Laccaria bicolor S238N-H82]
GME3524_g	EG/EL	0	0.5	1.17	0	-	-	-	-	-
GME7774_g	EG/EL	0	1	1.34	0	ko00650//Butanoate metabolism;ko01100//Metabolic pathways;ko00250//Alanine, aspartate and glutamate metabolism;ko04727//GABAergic synapse;ko04940//Type I diabetes mellitus;ko00410//beta-Alanine metabolism;ko01110//Biosynthesis of secondary metabolites;ko00430//Taurine and hypotaurine metabolism	-	GO:0016831//carboxy-lyase activity;GO:0048037//cofactor binding	GO:0009064//glutamine family amino acid metabolic process	gi|389749305|gb|EIM90482.1|/0/glutamate decarboxylase [Stereum hirsutum FP-91666 SS1]
GME6812_g	EG/EL	0	1.67	0.33	0	-	-	-	-	gi|403414925|emb|CCM01625.1|/5.49199e-07/predicted protein [Fibroporia radiculosa]
GME882_g	EG/EL	0	1	0.33	0	-	-	-	-	gi|170093103|ref|XP_001877773.1|/7.81612e-153/predicted protein [Laccaria bicolor S238N-H82]
GME291_g	EG/EL	0	0.33	0.33	0	-	-	-	-	gi|170109883|ref|XP_001886148.1|/1.95789e-12/predicted protein [Laccaria bicolor S238N-H82]
GME3334_g	EG/EL	0	0.5	0.33	0	-	-	-	-	gi|302677991|ref|XP_003028678.1|/1.48481e-14/hypothetical protein SCHCODRAFT_237049 [Schizophyllum commune H4-8]
GME4505_g	EG/EL	0	0.33	0.33	0	-	-	-	-	-
GME2321_g	EG/EL	0	1.17	0.33	0	ko01100//Metabolic pathways;ko00860//Porphyrin and chlorophyll metabolism;ko00640//Propanoate metabolism;ko00430//Taurine and hypotaurine metabolism;ko01110//Biosynthesis of secondary metabolites;ko00620//Pyruvate metabolism;ko00680//Methane metabolism;ko01120//Microbial metabolism in diverse environments	-	-	-	gi|170096913|ref|XP_001879676.1|/5.41397e-82/predicted protein [Laccaria bicolor S238N-H82]
GME1172_g	EG/EL	0	0.33	0.33	0	-	-	-	-	gi|392590925|gb|EIW80253.1|/5.93985e-08/hypothetical protein CONPUDRAFT_144419 [Coniophora puteana RWD-64-598 SS2]
GME6940_g	EG/EL	0	0.33	0.33	0	-	-	-	-	gi|170103987|ref|XP_001883208.1|/8.0591e-51/predicted protein [Laccaria bicolor S238N-H82]
GME8268_g	EG/EL	0	0.33	0.33	0	-	-	GO:0003676//nucleic acid binding	GO:0009987//cellular process	gi|238576601|ref|XP_002388093.1|/0/hypothetical protein MPER_12935 [Moniliophthora perniciosa FA553]
GME8989_g	EG/EL	0	0.33	0.5	0	-	-	-	-	gi|393244468|gb|EJD51980.1|/2.58779e-86/hypothetical protein AURDEDRAFT_181547 [Auricularia delicata TFB-10046 SS5]
GME10363_g	EG/EL	0	0.5	2.18	0	-	-	-	-	gi|170107025|ref|XP_001884723.1|/1.90191e-39/predicted protein [Laccaria bicolor S238N-H82]
GME11078_g	EG/EL	0	0.5	0.67	0	-	-	-	-	-
GME5621_g	EG/EL	0	0.33	0.33	0	ko04111//Cell cycle - yeast	-	-	-	gi|393215109|gb|EJD00601.1|/9.21799e-174/condensin complex subunit SMC2 [Fomitiporia mediterranea MF3/22]
GME3056_g	EG/EL	0	0.84	0.5	0	-	-	-	-	gi|393222417|gb|EJD07901.1|/3.75071e-44/hypothetical protein FOMMEDRAFT_138017 [Fomitiporia mediterranea MF3/22]
GME4334_g	EG/EL	0	0.67	0.33	0	-	-	-	-	gi|336381069|gb|EGO22221.1|/2.16536e-87/hypothetical protein SERLADRAFT_440237 [Serpula lacrymans var. lacrymans S7.9]
GME2997_g	EG/EL	0	0.33	1.51	0	ko00520//Amino sugar and nucleotide sugar metabolism;ko01110//Biosynthesis of secondary metabolites	-	GO:0003824//catalytic activity	-	gi|389743811|gb|EIM84995.1|/1.76224e-126/chitin deacetylase [Stereum hirsutum FP-91666 SS1]
GME3139_g	EG/EL	0	0.33	0.33	0	-	-	-	-	gi|170116662|ref|XP_001889521.1|/2.26862e-10/predicted protein [Laccaria bicolor S238N-H82]
GME5106_g	EG/EL	0	0.67	0.33	0	-	-	-	-	-
GME155_g	EG/EL	0	1.17	0.33	0	-	-	-	-	-
GME2679_g	EG/EL	0	0.33	0.33	0	-	-	-	-	gi|392568016|gb|EIW61190.1|/8.37706e-73/hypothetical protein TRAVEDRAFT_116011 [Trametes versicolor FP-101664 SS1]
GME6164_g	EG/EL	0	0.5	0.33	0	-	-	GO:0016787//hydrolase activity	GO:0008152//metabolic process	gi|393221777|gb|EJD07261.1|/0/glycoside hydrolase family 31 protein [Fomitiporia mediterranea MF3/22]
GME11370_g	EG/EL	0	0.5	0.5	0	-	-	-	-	gi|170083965|ref|XP_001873206.1|/3.01975e-44/predicted protein [Laccaria bicolor S238N-H82]
GME3329_g	EG/EL	0	2.01	1.51	0	-	-	-	-	gi|170086572|ref|XP_001874509.1|/2.55892e-24/predicted protein [Laccaria bicolor S238N-H82]
GME11799_g	EG/EL	0	0.33	0.67	0	-	-	-	-	-
GME5620_g	EG/EL	0	1.17	1.34	0	ko04111//Cell cycle - yeast	-	-	GO:0009987//cellular process	gi|403413523|emb|CCM00223.1|/4.27922e-167/predicted protein [Fibroporia radiculosa]
GME11557_g	EG/EL	0	0.33	0.33	0	-	-	-	-	gi|299755320|ref|XP_002912092.1|/1.13743e-17/hypothetical protein CC1G_13625 [Coprinopsis cinerea okayama7#130]
GME1467_g	EG/EL	0	1	0.5	0	-	-	-	-	gi|170095385|ref|XP_001878913.1|/7.19678e-64/predicted protein [Laccaria bicolor S238N-H82]
GME5350_g	EG/EL	0	0.84	0.5	0	-	GO:0043231//intracellular membrane-bounded organelle	GO:0032561//guanyl ribonucleotide binding	-	gi|170088502|ref|XP_001875474.1|/3.41874e-132/predicted protein [Laccaria bicolor S238N-H82]
GME5533_g	EG/EL	0	0.5	0.33	0	-	-	-	-	gi|392566921|gb|EIW60096.1|/9.41841e-140/hypothetical protein TRAVEDRAFT_45345 [Trametes versicolor FP-101664 SS1]
GME7431_g	EG/EL	0	2.01	0.33	0	-	-	-	-	gi|392568369|gb|EIW61543.1|/3.54433e-36/hypothetical protein TRAVEDRAFT_69874 [Trametes versicolor FP-101664 SS1]
GME2281_g	EG/EL	0	0.33	0.5	0	-	-	-	-	gi|170093317|ref|XP_001877880.1|/1.79499e-31/predicted protein [Laccaria bicolor S238N-H82]
GME9549_g	EG/EL	0	0.33	0.67	0	-	-	-	-	gi|170084525|ref|XP_001873486.1|/4.33304e-71/predicted protein [Laccaria bicolor S238N-H82]
GME1090_g	EG/EL	0	0.33	0.67	0	ko04011//MAPK signaling pathway - yeast	GO:0044464//cell part	GO:0046914//transition metal ion binding	-	gi|299746852|ref|XP_001839498.2|/7.67571e-31/hypothetical protein CC1G_08877 [Coprinopsis cinerea okayama7#130]
GME11716_g	EG/EL	0	1.67	0.33	0	-	-	-	-	gi|403411699|emb|CCL98399.1|/5.77077e-95/predicted protein [Fibroporia radiculosa]
GME5947_g	EG/EL	0	1	0.33	0	-	-	-	-	gi|170099443|ref|XP_001880940.1|/1.08886e-60/predicted protein [Laccaria bicolor S238N-H82]
GME5718_g	EG/EL	0	1.84	1.17	0	-	-	-	-	gi|170096678|ref|XP_001879559.1|/8.00959e-95/predicted protein [Laccaria bicolor S238N-H82]
GME9801_g	EG/EL	0	0.84	0.5	0	-	-	-	-	-
GME11731_g	EG/EL	0	1	0.84	0	ko03008//Ribosome biogenesis in eukaryotes	-	-	-	gi|170085385|ref|XP_001873916.1|/9.2256e-29/predicted protein [Laccaria bicolor S238N-H82]
GME4743_g	EG/EL	0	1	0.33	0	-	-	-	-	-
GME8775_g	EG/EL	0	0.5	0.67	0	-	-	-	-	gi|170087068|ref|XP_001874757.1|/4.73475e-26/predicted protein [Laccaria bicolor S238N-H82]
GME9037_g	EG/EL	0	0.5	0.67	0	-	-	-	-	gi|390602058|gb|EIN11451.1|/1.32807e-15/hypothetical protein PUNSTDRAFT_98561 [Punctularia strigosozonata HHB-11173 SS5]
GME4873_g	EG/EL	0	0.33	0.5	0	ko00460//Cyanoamino acid metabolism	-	-	-	gi|169850489|ref|XP_001831939.1|/1.51984e-70/hypothetical protein CC1G_06990 [Coprinopsis cinerea okayama7#130]
GME660_g	EG/EL	0	0.67	0.67	0	-	-	-	-	gi|170098376|ref|XP_001880407.1|/1.75562e-46/predicted protein [Laccaria bicolor S238N-H82]
GME10429_g	EG/EL	0	0.33	0.33	0	ko02020//Two-component system;ko01100//Metabolic pathways;ko00920//Sulfur metabolism;ko00270//Cysteine and methionine metabolism;ko00450//Selenocompound metabolism;ko00260//Glycine, serine and threonine metabolism;ko01110//Biosynthesis of secondary metabolites	-	-	-	gi|170100218|ref|XP_001881327.1|/0/predicted protein [Laccaria bicolor S238N-H82]
GME2868_g	EG/EL	0	0.67	0.33	0	-	-	-	-	gi|170111442|ref|XP_001886925.1|/6.79171e-23/predicted protein [Laccaria bicolor S238N-H82]
GME153_g	EG/EL	0	2.01	0.5	0	ko00624//Polycyclic aromatic hydrocarbon degradation;ko01100//Metabolic pathways;ko00627//Aminobenzoate degradation;ko00363//Bisphenol degradation;ko01110//Biosynthesis of secondary metabolites;ko00903//Limonene and pinene degradation;ko00945//Stilbenoid, diarylheptanoid and gingerol biosynthesis;ko01120//Microbial metabolism in diverse environments;ko01100//Metabolic pathways;ko00590//Arachidoni…	-	GO:0046872//metal ion binding	-	gi|299740025|ref|XP_001840420.2|/1.05042e-135/cytochrome P450 [Coprinopsis cinerea okayama7#130]
GME4637_g	EG/EL	0	0.67	0.33	0	-	-	-	-	gi|170104565|ref|XP_001883496.1|/1.01696e-114/predicted protein [Laccaria bicolor S238N-H82]
GME8127_g	EG/EL	0	0.84	0.5	0	-	-	-	-	gi|170098931|ref|XP_001880684.1|/3.78831e-96/predicted protein [Laccaria bicolor S238N-H82]
GME6493_g	EG/EL	0	0.5	2.34	0	-	GO:0031224//intrinsic to membrane	GO:0015101//organic cation transmembrane transporter activity	GO:0015696//ammonium transport	gi|302678815|ref|XP_003029090.1|/0/hypothetical protein SCHCODRAFT_70174 [Schizophyllum commune H4-8]
GME6243_g	EG/EL	0	1	0.33	0	-	-	-	-	gi|170094975|ref|XP_001878708.1|/5.85185e-38/predicted protein [Laccaria bicolor S238N-H82]
GME4164_g	EG/EL	0	1	0.33	0	-	-	GO:0046872//metal ion binding	-	gi|302686254|ref|XP_003032807.1|/3.54504e-77/hypothetical protein SCHCODRAFT_82034 [Schizophyllum commune H4-8]
GME4_g	EG/EL	0	0.33	0.5	0	-	-	-	-	-
GME3673_g	EG/EL	0	4.01	0.33	0	-	-	-	-	gi|393214723|gb|EJD00216.1|/2.49872e-57/hypothetical protein FOMMEDRAFT_22670 [Fomitiporia mediterranea MF3/22]
GME6992_g	EG/EL	0	0.33	0.33	0	-	-	-	-	gi|392568364|gb|EIW61538.1|/4.66771e-33/hypothetical protein TRAVEDRAFT_117935 [Trametes versicolor FP-101664 SS1]
GME2556_g	EG/EL	0	0.84	0.33	0	-	-	-	-	gi|170116656|ref|XP_001889518.1|/5.56178e-19/predicted protein [Laccaria bicolor S238N-H82]
GME2294_g	EG/EL	0	0.33	0.33	0	ko03022//Basal transcription factors;ko05168//Herpes simplex infection	-	GO:0003676//nucleic acid binding	GO:0006351//transcription, DNA-dependent	gi|299743831|ref|XP_001836008.2|/2.28313e-176/transcription initiation factor TFIID complex 60 kDa subunit [Coprinopsis cinerea okayama7#130]
GME2683_g	EG/EL	0	0.33	0.33	0	-	-	-	-	gi|299738023|ref|XP_001841511.2|/4.32856e-32/hypothetical protein CC1G_13243 [Coprinopsis cinerea okayama7#130]
GME2060_g	EG/EL	0	2.17	0.67	0	-	-	-	-	gi|170111651|ref|XP_001887029.1|/1.64942e-62/predicted protein [Laccaria bicolor S238N-H82]
GME9183_g	EG/EL	0	0.84	1.17	0	-	-	-	-	gi|299748272|ref|XP_001837575.2|/9.47798e-70/hypothetical protein CC1G_08129 [Coprinopsis cinerea okayama7#130]
GME11215_g	EG/EL	0	0.5	0.33	0	-	-	-	-	gi|169865143|ref|XP_001839175.1|/1.27885e-11/hypothetical protein CC1G_07890 [Coprinopsis cinerea okayama7#130]
GME8350_g	EG/EL	0	1.17	1	0	-	-	GO:0005543//phospholipid binding	GO:0009987//cellular process	gi|170090790|ref|XP_001876617.1|/3.50681e-177/predicted protein [Laccaria bicolor S238N-H82]
GME9036_g	EG/EL	0	0.5	1	0	-	-	-	-	gi|213402909|ref|XP_002172227.1|/4.95775e-07/conserved hypothetical protein [Schizosaccharomyces japonicus yFS275]
GME4517_g	EG/EL	0	0.84	0.33	0	-	-	-	-	gi|169865143|ref|XP_001839175.1|/1.2678e-11/hypothetical protein CC1G_07890 [Coprinopsis cinerea okayama7#130]
GME2765_g	EG/EL	0	0.33	0.33	0	-	-	-	-	gi|336382090|gb|EGO23241.1|/1.89323e-164/hypothetical protein SERLADRAFT_472117 [Serpula lacrymans var. lacrymans S7.9]
GME1799_g	EG/EL	0	0.33	1	0	-	-	-	-	gi|299743619|ref|XP_002910685.1|/1.42132e-179/hypothetical protein CC1G_15016 [Coprinopsis cinerea okayama7#130]
GME11568_g	EG/EL	0	0.84	1	0	ko03015//mRNA surveillance pathway;ko03013//RNA transport	-	-	-	gi|170086095|ref|XP_001874271.1|/0/predicted protein [Laccaria bicolor S238N-H82]
GME3364_g	EG/EL	0	0.5	0.5	0	-	-	-	-	gi|170118239|ref|XP_001890301.1|/5.67293e-14/predicted protein [Laccaria bicolor S238N-H82]
GME7298_g	EG/EL	0	0.33	0.33	0	ko00620//Pyruvate metabolism;ko00720//Carbon fixation pathways in prokaryotes;ko01100//Metabolic pathways;ko01120//Microbial metabolism in diverse environments;ko00020//Citrate cycle (TCA cycle)	-	GO:0003824//catalytic activity	-	gi|299740213|ref|XP_001838959.2|/0/carboxylase:pyruvate/acetyl-CoA/propionyl-CoA [Coprinopsis cinerea okayama7#130]
GME11130_g	EG/EL	0	1.34	0.84	0	-	-	-	-	gi|169851426|ref|XP_001832403.1|/3.10627e-143/hypothetical protein CC1G_07663 [Coprinopsis cinerea okayama7#130]
GME2970_g	EG/EL	0	1.51	3.68	0	-	-	-	-	-
GME1348_g	EG/EL	0	0.84	0.33	0	-	-	-	-	-
GME10110_g	EG/EL	0	1	1	0	-	-	GO:0016791//phosphatase activity	-	gi|336371994|gb|EGO00334.1|/1.90018e-177/hypothetical protein SERLA73DRAFT_180872 [Serpula lacrymans var. lacrymans S7.3]
GME2149_g	EG/EL	0	0.33	0.67	0	-	-	-	-	gi|170090067|ref|XP_001876256.1|/5.02484e-64/predicted protein [Laccaria bicolor S238N-H82]
GME11177_g	EG/EL	0	0.5	0.67	0	-	-	-	-	gi|170091326|ref|XP_001876885.1|/4.15431e-110/predicted protein [Laccaria bicolor S238N-H82]
GME7128_g	EG/EL	0	0.84	0.5	0	-	-	-	-	gi|170087794|ref|XP_001875120.1|/3.01061e-13/predicted protein [Laccaria bicolor S238N-H82]
GME1881_g	EG/EL	0	2.17	1.34	0	-	GO:0016020//membrane	-	-	gi|170090045|ref|XP_001876245.1|/9.51411e-119/predicted protein [Laccaria bicolor S238N-H82]
GME11073_g	EG/EL	0	2.84	0.5	0	ko04110//Cell cycle;ko04114//Oocyte meiosis;ko04111//Cell cycle - yeast;ko04113//Meiosis - yeast	-	-	-	gi|170118334|ref|XP_001890347.1|/0/cysteine peptidase C50 [Laccaria bicolor S238N-H82]
GME7500_g	EG/EL	0	0.33	0.5	0	-	-	-	-	gi|170108997|ref|XP_001885706.1|/2.62944e-35/predicted protein [Laccaria bicolor S238N-H82]
GME5889_g	EG/EL	0	0.33	0.33	0	ko05031//Amphetamine addiction;ko04330//Notch signaling pathway;ko05169//Epstein-Barr virus infection;ko05220//Chronic myeloid leukemia;ko04110//Cell cycle;ko05016//Huntington's disease;ko05200//Pathways in cancer;ko05202//Transcriptional misregulation in cancer;ko05034//Alcoholism;ko01100//Metabolic pathways;ko00563//Glycosylphosphatidylinositol(GPI)-anchor biosynthesis	-	GO:0017136//NAD-dependent histone deacetylase activity	GO:0009987//cellular process;GO:0008152//metabolic process	gi|299748394|ref|XP_001839095.2|/3.60892e-50/GPI ethanolamine phosphate transferase 1 [Coprinopsis cinerea okayama7#130]
GME8366_g	EG/EL	0	0.33	0.84	0	-	-	-	-	-
GME7196_g	EG/EL	0	0.33	0.33	0	-	-	-	-	-
GME2485_g	EG/EL	0	0.67	10.05	0	-	-	-	-	gi|170106373|ref|XP_001884398.1|/7.49483e-06/predicted protein [Laccaria bicolor S238N-H82]
GME5301_g	EG/EL	0	1	0.33	0	-	-	-	-	gi|170109591|ref|XP_001886002.1|/2.62332e-101/predicted protein [Laccaria bicolor S238N-H82]
GME7246_g	EG/EL	0	0.67	0.33	0	-	-	-	-	gi|170102903|ref|XP_001882667.1|/2.58389e-20/predicted protein [Laccaria bicolor S238N-H82]
GME7410_g	EG/EL	0	0.33	0.5	0	-	-	-	-	gi|170107053|ref|XP_001884737.1|/1.48665e-58/predicted protein [Laccaria bicolor S238N-H82]
GME5940_g	EG/EL	0	0.67	0.33	0	-	-	GO:0016790//thiolester hydrolase activity	GO:0019941//modification-dependent protein catabolic process	gi|170091394|ref|XP_001876919.1|/1.04295e-54/predicted protein [Laccaria bicolor S238N-H82]
GME3948_g	EG/EL	0	0.84	1.67	0	-	-	-	-	-
GME8126_g	EG/EL	0	0.5	0.33	0	-	-	-	-	gi|170099399|ref|XP_001880918.1|/1.36428e-90/predicted protein [Laccaria bicolor S238N-H82]
GME3460_g	EG/EL	0	0.67	0.5	0	ko04011//MAPK signaling pathway - yeast;ko04113//Meiosis - yeast	-	GO:0000166//nucleotide binding	-	gi|170113742|ref|XP_001888070.1|/5.43823e-129/G-protein alpha subunit [Laccaria bicolor S238N-H82]
GME3898_g	EG/EL	0	1	0.33	0	ko01100//Metabolic pathways;ko00520//Amino sugar and nucleotide sugar metabolism;ko00500//Starch and sucrose metabolism;ko01110//Biosynthesis of secondary metabolites	-	-	-	gi|390595663|gb|EIN05067.1|/1.01124e-92/glycoside hydrolase [Punctularia strigosozonata HHB-11173 SS5]
GME5198_g	EG/EL	0	1.17	0.33	0	ko01100//Metabolic pathways;ko00380//Tryptophan metabolism	-	GO:0003824//catalytic activity	-	gi|170109809|ref|XP_001886111.1|/5.68182e-135/predicted protein [Laccaria bicolor S238N-H82]
GME3924_g	EG/EL	0	1.34	2.18	0	-	-	-	-	gi|395328328|gb|EJF60721.1|/1.32955e-14/hypothetical protein DICSQDRAFT_19970, partial [Dichomitus squalens LYAD-421 SS1]
GME10955_g	EG/EL	0	0.84	0.33	0	-	-	-	-	gi|170103729|ref|XP_001883079.1|/2.79925e-35/predicted protein [Laccaria bicolor S238N-H82]
GME3584_g	EG/EL	0	0.33	0.33	0	-	-	-	-	gi|336363882|gb|EGN92251.1|/3.68621e-54/hypothetical protein SERLA73DRAFT_164145 [Serpula lacrymans var. lacrymans S7.3]
GME4418_g	EG/EL	0	0.33	0.5	0	-	-	-	-	gi|170098658|ref|XP_001880548.1|/1.19275e-23/predicted protein [Laccaria bicolor S238N-H82]
GME1996_g	EG/EL	0	0.67	0.5	0	-	-	-	-	gi|299743279|ref|XP_001835655.2|/6.14985e-18/hypothetical protein CC1G_03437 [Coprinopsis cinerea okayama7#130]
GME5849_g	EG/EL	0	3.18	1	0	ko04111//Cell cycle - yeast	-	-	-	gi|299741889|ref|XP_001832106.2|/4.7493e-142/hypothetical protein CC1G_07477 [Coprinopsis cinerea okayama7#130]
GME5070_g	EG/EL	0	0.33	0.33	0	-	-	-	-	gi|170096941|ref|XP_001879690.1|/3.43281e-16/predicted protein [Laccaria bicolor S238N-H82]
GME4254_g	EG/EL	0	1.34	0.84	0	-	-	GO:0005488//binding	-	gi|395331617|gb|EJF63997.1|/4.09427e-154/ANTH-domain-containing protein [Dichomitus squalens LYAD-421 SS1]
GME6244_g	EG/EL	0	1	0.33	0	-	-	-	-	gi|170095467|ref|XP_001878954.1|/2.41817e-69/predicted protein [Laccaria bicolor S238N-H82]
GME8442_g	EG/EL	0	0.33	0.33	0	-	-	-	-	gi|336364645|gb|EGN93000.1|/2.85885e-23/hypothetical protein SERLA73DRAFT_190122 [Serpula lacrymans var. lacrymans S7.3]
GME6113_g	EG/EL	0	0.33	0.33	0	ko04150//mTOR signaling pathway;ko04140//Regulation of autophagy	-	GO:0004672//protein kinase activity;GO:0032559	GO:0006464//cellular protein modification process	gi|299746462|ref|XP_002911050.1|/0/other/ULK/ULK protein kinase [Coprinopsis cinerea okayama7#130]
GME5358_g	EG/EL	0	0.33	0.33	0	-	-	-	-	gi|299753136|ref|XP_001833085.2|/6.07485e-135/hypothetical protein CC1G_01147 [Coprinopsis cinerea okayama7#130]
GME8811_g	EG/EL	0	0.33	0.33	0	-	GO:0043234//protein complex	-	GO:0006355//regulation of transcription, DNA-dependent	gi|336373376|gb|EGO01714.1|/5.02938e-86/hypothetical protein SERLA73DRAFT_103659 [Serpula lacrymans var. lacrymans S7.3]
GME8633_g	EG/EL	0	0.33	0.33	0	ko03050//Proteasome	-	-	-	gi|403418135|emb|CCM04835.1|/8.0725e-97/predicted protein [Fibroporia radiculosa]
GME3167_g	EG/EL	0	0.67	0.67	0	-	-	-	-	gi|392562962|gb|EIW56142.1|/1.15816e-64/hypothetical protein TRAVEDRAFT_60129 [Trametes versicolor FP-101664 SS1]
GME6261_g	EG/EL	0	0.5	2.18	0	-	-	-	-	gi|170094979|ref|XP_001878710.1|/9.14799e-69/predicted protein [Laccaria bicolor S238N-H82]
GME10612_g	EG/EL	0	1.67	0.5	0	-	-	-	-	-
GME812_g	EG/EL	0	0.33	0.33	0	-	-	-	-	gi|169847071|ref|XP_001830247.1|/2.22542e-32/hypothetical protein CC1G_01883 [Coprinopsis cinerea okayama7#130]
GME892_g	EG/EL	0	0.5	0.33	0	-	-	-	-	gi|299751084|ref|XP_001830044.2|/2.18871e-35/hypothetical protein CC1G_04477 [Coprinopsis cinerea okayama7#130]
GME11609_g	EG/EL	0	0.84	0.33	0	ko04141//Protein processing in endoplasmic reticulum	GO:0044464//cell part	GO:0046914//transition metal ion binding	-	gi|170086055|ref|XP_001874251.1|/0/predicted protein [Laccaria bicolor S238N-H82]
GME5767_g	EL/MA	0	0	0.84	1.01	-	-	GO:0004180//carboxypeptidase activity	GO:0019538//protein metabolic process	gi|390594896|gb|EIN04304.1|/0/alpha/beta-hydrolase [Punctularia strigosozonata HHB-11173 SS5]
GME4407_g	EL/MA	0	0	0.33	0.5	-	-	-	-	gi|302678225|ref|XP_003028795.1|/1.55474e-16/hypothetical protein SCHCODRAFT_70203 [Schizophyllum commune H4-8]
GME2360_g	EL/MA	0	0	0.33	0.5	-	-	-	-	-
GME285_g	EL/MA	0	0	1	1.84	-	-	-	-	gi|393222882|gb|EJD08366.1|/6.03747e-63/hypothetical protein FOMMEDRAFT_151174 [Fomitiporia mediterranea MF3/22]
GME544_g	EL/MA	0	0	0.5	2.01	ko01100//Metabolic pathways;ko00500//Starch and sucrose metabolism	-	GO:0003824//catalytic activity	-	gi|392564918|gb|EIW58095.1|/1.74999e-149/glycoside hydrolase family 5 protein [Trametes versicolor FP-101664 SS1]
GME9912_g	EL/MA	0	0	0.33	0.84	-	-	-	-	gi|170092299|ref|XP_001877371.1|/4.04793e-143/predicted protein [Laccaria bicolor S238N-H82]
GME2782_g	EL/MA	0	0	0.33	0.34	-	-	-	-	-
GME7487_g	EL/MA	0	0	1	0.84	-	-	-	-	gi|170109037|ref|XP_001885726.1|/1.56701e-27/predicted protein [Laccaria bicolor S238N-H82]
GME2648_g	EL/MA	0	0	2.18	9.38	-	-	-	-	gi|170111194|ref|XP_001886801.1|/3.35395e-78/predicted protein [Laccaria bicolor S238N-H82]
GME5629_g	EL/MA	0	0	0.67	2.01	-	-	-	-	gi|170096350|ref|XP_001879395.1|/1.66932e-31/predicted protein [Laccaria bicolor S238N-H82]
GME7083_g	EL/MA	0	0	0.33	0.34	-	-	-	-	gi|342887248|gb|EGU86813.1|/1.7988e-21/hypothetical protein FOXB_02669 [Fusarium oxysporum Fo5176]
GME9279_g	EL/MA	0	0	2.51	0.67	-	-	-	-	-
GME3861_g	EL/MA	0	0	0.33	0.5	-	GO:0043231//intracellular membrane-bounded organelle;GO:0044427//chromosomal part	GO:0017111//nucleoside-triphosphatase activity;GO:0032559	GO:0009207;GO:0006325//chromatin organization	gi|403414772|emb|CCM01472.1|/1.50305e-32/predicted protein [Fibroporia radiculosa]
GME2404_g	EL/MA	0	0	0.67	0.5	ko01100//Metabolic pathways;ko00400//Phenylalanine, tyrosine and tryptophan biosynthesis;ko01110//Biosynthesis of secondary metabolites	GO:0044424//intracellular part	GO:0046872//metal ion binding;GO:0016838//carbon-oxygen lyase activity, acting on phosphates;GO:0016301//kinase activity;GO:0016616//oxidoreductase activity, acting on the CH-OH group of donors, NAD or NADP as acceptor;GO:0016765//transferase activity, transferring alkyl or aryl (other than methyl) groups;GO:0016836//hydro-lyase activity;GO:0032559	GO:0008652//cellular amino acid biosynthetic process	gi|327507659|sp|B0D6H2.1|ARO1_LACBS/2.10861e-50/RecName: Full=Pentafunctional AROM polypeptide; Includes: RecName: Full=3-dehydroquinate synthase; Short=DHQS; Includes: RecName: Full=3-phosphoshikimate 1-carboxyvinyltransferase; AltName: Full=5-enolpyruvylshikimate-3-phosphate synthase; Short=EPSP synthase; Short=EPSPS; Includes: RecName: Full=Shikimate kinase; Short=SK; Includes: RecName: Full=3…
GME437_g	EL/MA	0	0	4.19	1.51	-	-	-	-	-
GME9743_g	EL/MA	0	0	0.84	0.34	-	-	-	-	gi|302695573|ref|XP_003037465.1|/1.47063e-53/hypothetical protein SCHCODRAFT_104289 [Schizophyllum commune H4-8]
GME7264_g	EL/MA	0	0	0.33	1.01	-	-	-	GO:0006810//transport	gi|170102635|ref|XP_001882533.1|/7.74192e-173/APC amino acid permease [Laccaria bicolor S238N-H82]
GME9126_g	EL/MA	0	0	0.5	0.34	-	-	-	-	gi|170103344|ref|XP_001882887.1|/6.5191e-16/predicted protein [Laccaria bicolor S238N-H82]
GME5441_g	EL/MA	0	0	0.33	0.5	-	-	-	-	gi|12862434|dbj|BAB32470.1|/9.54332e-106/Pol-like protein Pol-2 [Tricholoma matsutake]
GME9694_g	EL/MA	0	0	0.33	0.67	-	GO:0031224//intrinsic to membrane	GO:0015075//ion transmembrane transporter activity	GO:0006810//transport	gi|299756152|ref|XP_001829130.2|/2.22967e-81/hypothetical protein CC1G_01810 [Coprinopsis cinerea okayama7#130]
GME185_g	EL/MA	0	0	0.33	3.18	-	-	-	-	-
GME4582_g	EL/MA	0	0	0.33	0.34	ko00624//Polycyclic aromatic hydrocarbon degradation;ko01100//Metabolic pathways;ko00627//Aminobenzoate degradation;ko00363//Bisphenol degradation;ko01110//Biosynthesis of secondary metabolites;ko00903//Limonene and pinene degradation;ko00945//Stilbenoid, diarylheptanoid and gingerol biosynthesis;ko01120//Microbial metabolism in diverse environments;ko01100//Metabolic pathways;ko00360//Phenylalan…	-	GO:0046872//metal ion binding	-	gi|299740859|ref|XP_001834057.2|/5.21689e-163/cytochrome P450 [Coprinopsis cinerea okayama7#130]
GME2483_g	EL/MA	0	0	1.34	0.84	-	-	-	-	-
GME225_g	EL/MA	0	0	1.34	3.69	-	-	-	-	-
GME11862_g	EL/MA	0	0	0.33	0.67	-	-	-	-	-
GME4890_g	EL/MA	0	0	6.86	0.34	-	-	-	-	gi|170110680|ref|XP_001886545.1|/5.73369e-21/predicted protein [Laccaria bicolor S238N-H82]
GME374_g	EL/MA	0	0	1.67	4.02	-	-	-	-	-
GME1580_g	EL/MA	0	0	1	0.67	-	-	-	-	-
GME1829_g	EL/MA	0	0	1.84	7.88	ko02010//ABC transporters;ko01100//Metabolic pathways;ko00603//Glycosphingolipid biosynthesis - globo series;ko00531//Glycosaminoglycan degradation;ko01110//Biosynthesis of secondary metabolites;ko04142//Lysosome;ko00520//Amino sugar and nucleotide sugar metabolism;ko00511//Other glycan degradation;ko03018//RNA degradation;ko00604//Glycosphingolipid biosynthesis - ganglio series	-	GO:0015929//hexosaminidase activity;GO:0043167//ion binding	GO:0044238//primary metabolic process	gi|299743256|ref|XP_001835638.2|/0/beta-hexosaminidase [Coprinopsis cinerea okayama7#130]
GME6084_g	EL/MA	0	0	0.67	1.01	ko01100//Metabolic pathways;ko00564//Glycerophospholipid metabolism;ko00561//Glycerolipid metabolism;ko00592//alpha-Linolenic acid metabolism	-	-	-	gi|389740261|gb|EIM81452.1|/6.4657e-98/hypothetical protein STEHIDRAFT_85777 [Stereum hirsutum FP-91666 SS1]
GME252_g	EL/MA	0	0	0.5	0.84	-	-	-	-	gi|299745010|ref|XP_001831411.2|/6.61857e-31/hypothetical protein CC1G_00958 [Coprinopsis cinerea okayama7#130]
GME7565_g	EL/MA	0	0	2.85	1.17	-	-	-	-	gi|170087340|ref|XP_001874893.1|/9.45206e-07/predicted protein [Laccaria bicolor S238N-H82]
GME11105_g	EL/MA	0	0	2.85	1.51	-	-	-	-	gi|238582519|ref|XP_002389957.1|/4.70872e-46/hypothetical protein MPER_10847 [Moniliophthora perniciosa FA553]
GME9340_g	EL/MA	0	0	1.34	0.5	ko00627//Aminobenzoate degradation;ko01120//Microbial metabolism in diverse environments	-	GO:0003824//catalytic activity	-	gi|170084625|ref|XP_001873536.1|/3.13146e-123/predicted protein [Laccaria bicolor S238N-H82]
GME1401_g	EL/MA	0	0	0.5	0.34	-	-	-	-	gi|325511336|sp|A8NVW1.2|IML2_COPC7/3.21813e-78/RecName: Full=Mitochondrial outer membrane protein IML2
GME7311_g	EL/MA	0	0	0.33	1.01	-	-	-	GO:0006811//ion transport	gi|395331495|gb|EJF63876.1|/9.85605e-46/hypothetical protein DICSQDRAFT_102012 [Dichomitus squalens LYAD-421 SS1]
GME9542_g	EL/MA	0	0	0.33	0.5	-	-	-	-	gi|170084519|ref|XP_001873483.1|/4.25964e-81/predicted protein [Laccaria bicolor S238N-H82]
GME3385_g	EL/MA	0	0	1	1.34	-	-	-	-	gi|392585505|gb|EIW74844.1|/1.53308e-23/terpenoid synthase [Coniophora puteana RWD-64-598 SS2]
GME10724_g	EL/MA	0	0	0.33	0.5	-	-	-	-	gi|395334923|gb|EJF67299.1|/5.9041e-08/hypothetical protein DICSQDRAFT_47142 [Dichomitus squalens LYAD-421 SS1]
GME354_g	EL/MA	0	0	0.33	0.5	-	-	GO:0016491//oxidoreductase activity	-	gi|299744143|ref|XP_001840903.2|/5.45549e-117/thymine dioxygenase [Coprinopsis cinerea okayama7#130]
GME646_g	EL/MA	0	0	0.33	0.67	ko01100//Metabolic pathways;ko00624//Polycyclic aromatic hydrocarbon degradation;ko00340//Histidine metabolism;ko00623//Toluene degradation;ko00627//Aminobenzoate degradation;ko00361//Chlorocyclohexane and chlorobenzene degradation;ko00363//Bisphenol degradation;ko00960//Tropane, piperidine and pyridine alkaloid biosynthesis;ko00903//Limonene and pinene degradation;ko00626//Naphthalene degradatio…	-	-	-	gi|403412528|emb|CCL99228.1|/9.04105e-151/predicted protein [Fibroporia radiculosa]
GME8866_g	EL/MA	0	0	0.33	0.5	ko00260//Glycine, serine and threonine metabolism	-	-	-	gi|170106181|ref|XP_001884302.1|/5.79073e-167/predicted protein [Laccaria bicolor S238N-H82]
GME8981_g	EL/MA	0	0	0.33	1.51	-	-	-	-	gi|336390120|gb|EGO31263.1|/1.29958e-13/hypothetical protein SERLADRAFT_432916 [Serpula lacrymans var. lacrymans S7.9]
GME7445_g	EL/MA	0	0	0.33	0.67	-	-	-	-	gi|170115629|ref|XP_001889008.1|/1.49905e-69/predicted protein [Laccaria bicolor S238N-H82]
GME4817_g	EL/MA	0	0	2.51	0.67	-	-	-	-	gi|390601851|gb|EIN11244.1|/4.60125e-45/DUF803-domain-containing protein [Punctularia strigosozonata HHB-11173 SS5]
GME8560_g	EL/MA	0	0	0.33	0.34	ko04120//Ubiquitin mediated proteolysis	-	-	-	gi|395328722|gb|EJF61112.1|/1.39982e-75/UBC-like protein [Dichomitus squalens LYAD-421 SS1]
GME2986_g	EL/MA	0	0	4.02	1.17	-	-	-	-	-
GME845_g	EL/MA	0	0	0.67	0.84	-	-	-	-	gi|170097804|ref|XP_001880121.1|/2.24566e-59/predicted protein [Laccaria bicolor S238N-H82]
GME3865_g	EL/MA	0	0	0.33	0.34	-	-	GO:0046872//metal ion binding;GO:0004601//peroxidase activity	GO:0006950//response to stress;GO:0044237//cellular metabolic process	gi|389616328|gb|AFK91528.1|/4.9984e-151/manganese peroxidase 1 [Cerrena unicolor]
GME4708_g	EL/MA	0	0	0.67	2.18	-	-	-	-	-
GME10945_g	EL/MA	0	0	0.33	0.84	-	-	-	-	gi|170113706|ref|XP_001888052.1|/6.36264e-06/predicted protein [Laccaria bicolor S238N-H82]
GME4485_g	EL/MA	0	0	0.33	0.67	-	-	-	-	-
GME1835_g	EL/MA	0	0	0.5	0.34	-	-	-	-	-
GME6971_g	EL/MA	0	0	0.5	1.84	-	-	-	GO:0051704	gi|37529673|gb|AAQ92757.1|/4.85586e-94/volvatoxin A2 precursor [Volvariella volvacea]
GME7456_g	EL/MA	0	0	0.33	0.34	-	-	-	-	gi|170115325|ref|XP_001888857.1|/2.10772e-22/predicted protein [Laccaria bicolor S238N-H82]
GME4814_g	EL/MA	0	0	9.04	1.17	ko04011//MAPK signaling pathway - yeast;ko04113//Meiosis - yeast	-	GO:0032561//guanyl ribonucleotide binding;GO:0060089	GO:0007166//cell surface receptor signaling pathway	gi|336372100|gb|EGO00440.1|/4.84083e-23/hypothetical protein SERLA73DRAFT_181041 [Serpula lacrymans var. lacrymans S7.3]
GME3765_g	EL/MA	0	0	0.5	0.84	-	-	-	-	gi|37529673|gb|AAQ92757.1|/1.87395e-25/volvatoxin A2 precursor [Volvariella volvacea]
GME1523_g	EL/MA	0	0	0.84	4.36	-	-	-	-	-
GME9323_g	EL/MA	0	0	0.67	0.34	ko01100//Metabolic pathways;ko00520//Amino sugar and nucleotide sugar metabolism;ko00500//Starch and sucrose metabolism;ko01110//Biosynthesis of secondary metabolites	-	-	-	gi|402225605|gb|EJU05666.1|/0/glycoside hydrolase [Dacryopinax sp. DJM-731 SS1]
GME4579_g	EL/MA	0	0	0.33	0.34	-	-	-	-	gi|170093830|ref|XP_001878136.1|/2.08342e-62/predicted protein [Laccaria bicolor S238N-H82]
GME1393_g	EL/MA	0	0	1	1.34	-	-	-	-	gi|170103146|ref|XP_001882788.1|/1.46665e-42/predicted protein [Laccaria bicolor S238N-H82]
GME5273_g	EL/MA	0	0	0.67	0.67	ko03460//Fanconi anemia pathway;ko01100//Metabolic pathways;ko00250//Alanine, aspartate and glutamate metabolism;ko00240//Pyrimidine metabolism;ko04146//Peroxisome	-	-	-	gi|169859925|ref|XP_001836599.1|/2.11321e-179/high-affinity nicotinic acid transporter [Coprinopsis cinerea okayama7#130]
GME3691_g	EL/MA	0	0	0.33	0.5	-	-	-	-	-
GME255_g	EL/MA	0	0	0.67	0.84	ko04530//Tight junction	-	-	-	gi|389745445|gb|EIM86626.1|/0/exocyst complex component Sec6 [Stereum hirsutum FP-91666 SS1]
GME6591_g	EL/MA	0	0	0.33	0.34	ko01100//Metabolic pathways;ko00520//Amino sugar and nucleotide sugar metabolism;ko00500//Starch and sucrose metabolism;ko01110//Biosynthesis of secondary metabolites	-	-	-	gi|393215389|gb|EJD00880.1|/9.42809e-63/hypothetical protein FOMMEDRAFT_110262 [Fomitiporia mediterranea MF3/22]
GME3953_g	EL/MA	0	0	1.67	31.17	ko01100//Metabolic pathways;ko00520//Amino sugar and nucleotide sugar metabolism;ko00500//Starch and sucrose metabolism;ko01110//Biosynthesis of secondary metabolites	-	GO:0016787//hydrolase activity	GO:0005975//carbohydrate metabolic process	gi|2494341|sp|Q00023.1|CEL1_AGABI/2.26193e-109/RecName: Full=Cellulose-growth-specific protein; Flags: Precursor
GME3196_g	EL/MA	0	0	0.5	1.68	-	-	-	-	gi|170107875|ref|XP_001885147.1|/3.71904e-11/GPI-anchored small secreted protein [Laccaria bicolor S238N-H82]
GME6769_g	EL/MA	0	0	0.33	0.67	-	-	-	-	-
GME1632_g	EL/MA	0	0	0.5	1.84	-	-	-	-	gi|170101020|ref|XP_001881727.1|/1.88771e-06/predicted protein [Laccaria bicolor S238N-H82]
GME6426_g	EL/MA	0	0	0.5	0.84	-	-	-	-	gi|169864174|ref|XP_001838699.1|/1.79229e-25/hypothetical protein CC1G_11642 [Coprinopsis cinerea okayama7#130]
GME2991_g	EL/MA	0	0	3.68	13.57	-	-	-	-	-
GME8098_g	EL/MA	0	0	0.67	1.01	-	-	-	-	gi|390595548|gb|EIN04953.1|/5.14669e-13/hypothetical protein PUNSTDRAFT_146228 [Punctularia strigosozonata HHB-11173 SS5]
GME1732_g	EL/MA	0	0	1.17	2.18	-	-	-	-	gi|299751886|ref|XP_001830558.2|/1.57508e-42/hypothetical protein CC1G_06824 [Coprinopsis cinerea okayama7#130]
GME314_g	EL/MA	0	0	1	0.34	ko04260//Cardiac muscle contraction;ko05416//Viral myocarditis;ko05410//Hypertrophic cardiomyopathy (HCM);ko04270//Vascular smooth muscle contraction;ko04530//Tight junction;ko05132//Salmonella infection;ko04810//Regulation of actin cytoskeleton;ko05414//Dilated cardiomyopathy;ko00230//Purine metabolism;ko05200//Pathways in cancer;ko04011//MAPK signaling pathway - yeast;ko05216//Thyroid cancer;ko…	-	-	-	gi|170087748|ref|XP_001875097.1|/0/hypothetical protein LACBIDRAFT_305228 [Laccaria bicolor S238N-H82]
GME3956_g	EL/MA	0	0	1.17	3.69	-	-	-	-	-
GME6274_g	EL/MA	0	0	0.33	0.34	-	-	-	-	gi|302695435|ref|XP_003037396.1|/4.86713e-20/hypothetical protein SCHCODRAFT_104164 [Schizophyllum commune H4-8]
GME9129_g	EL/MA	0	0	1.17	1.34	-	-	-	-	gi|170109101|ref|XP_001885758.1|/8.52872e-51/predicted protein [Laccaria bicolor S238N-H82]
GME10268_g	EL/MA	0	0	0.33	0.34	-	-	-	-	gi|336383902|gb|EGO25051.1|/7.02403e-10/hypothetical protein SERLADRAFT_415894 [Serpula lacrymans var. lacrymans S7.9]
GME10267_g	EL/MA	0	0	1	0.34	-	-	-	-	gi|336371158|gb|EGN99498.1|/3.06745e-88/hypothetical protein SERLA73DRAFT_90841 [Serpula lacrymans var. lacrymans S7.3]
GME6713_g	EL/MA	0	0	0.5	1.17	-	-	-	-	-
GME9425_g	EL/MA	0	0	0.33	0.5	ko01100//Metabolic pathways;ko00010//Glycolysis / Gluconeogenesis;ko03018//RNA degradation;ko01120//Microbial metabolism in diverse environments;ko01110//Biosynthesis of secondary metabolites;ko00680//Methane metabolism	GO:0043234//protein complex;GO:0044424//intracellular part	GO:0046872//metal ion binding;GO:0016836//hydro-lyase activity	GO:0006007//glucose catabolic process	gi|170085829|ref|XP_001874138.1|/0/phosphopyruvate hydratase [Laccaria bicolor S238N-H82]
GME6219_g	EL/MA	0	0	0.84	0.84	-	-	-	-	gi|170095643|ref|XP_001879042.1|/3.98141e-33/predicted protein [Laccaria bicolor S238N-H82]
GME313_g	EL/MA	0	0	2.18	2.51	ko00930//Caprolactam degradation;ko01120//Microbial metabolism in diverse environments	-	GO:0050662//coenzyme binding	-	gi|169613494|ref|XP_001800164.1|/0/hypothetical protein SNOG_09878 [Phaeosphaeria nodorum SN15]
GME8284_g	EL/MA	0	0	1.34	2.18	-	-	-	-	gi|299748162|ref|XP_001837503.2|/0/cleft lip and palate associated transmembrane protein [Coprinopsis cinerea okayama7#130]
GME4681_g	EL/MA	0	0	0.33	1.68	ko03450//Non-homologous end-joining;ko03440//Homologous recombination	-	-	-	gi|169851084|ref|XP_001832233.1|/5.74955e-140/hypothetical protein CC1G_02495 [Coprinopsis cinerea okayama7#130]
GME2731_g	EL/MA	0	0	0.33	18.77	-	-	-	-	gi|393233007|gb|EJD40583.1|/1.51887e-20/hypothetical protein AURDEDRAFT_170396 [Auricularia delicata TFB-10046 SS5]
GME67_g	EL/MA	0	0	0.33	0.5	-	-	-	-	-
GME8823_g	EL/MA	0	0	0.5	1.17	-	GO:0015630//microtubule cytoskeleton	GO:0003774//motor activity;GO:0032559	GO:0007017//microtubule-based process	gi|170087020|ref|XP_001874733.1|/0/kinesin-like protein [Laccaria bicolor S238N-H82]
GME10170_g	EL/MA	0	0	0.84	0.67	-	-	-	-	gi|392590076|gb|EIW79406.1|/1.18921e-21/hypothetical protein CONPUDRAFT_145444 [Coniophora puteana RWD-64-598 SS2]
GME9322_g	EL/MA	0	0	0.33	0.34	-	-	-	-	-
GME1130_g	EL/MA	0	0	0.5	0.5	-	-	-	GO:0006629//lipid metabolic process	gi|170106115|ref|XP_001884269.1|/0/cyclopropane-fatty-acyl-phospholipid synthase [Laccaria bicolor S238N-H82]
GME3314_g	EL/MA	0	0	0.33	2.85	-	-	-	-	gi|37529673|gb|AAQ92757.1|/3.65222e-34/volvatoxin A2 precursor [Volvariella volvacea]
GME519_g	EL/MA	0	0	0.67	0.5	-	-	-	-	gi|170099341|ref|XP_001880889.1|/3.02852e-87/predicted protein [Laccaria bicolor S238N-H82]
GME7312_g	EL/MA	0	0	0.33	0.5	-	-	-	GO:0006810//transport	gi|336388057|gb|EGO29201.1|/9.17846e-157/hypothetical protein SERLADRAFT_412793 [Serpula lacrymans var. lacrymans S7.9]
GME10559_g	EL/MA	0	0	0.5	0.34	-	-	-	-	gi|299750045|ref|XP_001836508.2|/7.45206e-53/hypothetical protein CC1G_07591 [Coprinopsis cinerea okayama7#130]
GME7133_g	EL/MA	0	0	3.18	3.69	-	-	GO:0003774//motor activity;GO:0000166//nucleotide binding	-	gi|170100252|ref|XP_001881344.1|/0/kinesin-like protein [Laccaria bicolor S238N-H82]
GME9742_g	EL/MA	0	0	1.51	0.34	-	-	-	-	gi|170084269|ref|XP_001873358.1|/0/predicted protein [Laccaria bicolor S238N-H82]
GME11605_g	EG/MA	0	0.33	0	0.34	ko03040//Spliceosome	-	-	-	gi|238580948|ref|XP_002389453.1|/4.28931e-76/hypothetical protein MPER_11418 [Moniliophthora perniciosa FA553]
GME5632_g	EG/MA	0	0.33	0	0.34	-	-	-	-	gi|390604910|gb|EIN14301.1|/3.6446e-44/hypothetical protein PUNSTDRAFT_96055 [Punctularia strigosozonata HHB-11173 SS5]
GME5364_g	EG/MA	0	1.34	0	1.01	ko04623//Cytosolic DNA-sensing pathway;ko01100//Metabolic pathways;ko00230//Purine metabolism;ko05169//Epstein-Barr virus infection;ko03020//RNA polymerase;ko00240//Pyrimidine metabolism;ko05134//Legionellosis	GO:0043231//intracellular membrane-bounded organelle;GO:0016020//membrane	GO:0017111//nucleoside-triphosphatase activity;GO:0032561//guanyl ribonucleotide binding	GO:0009207	gi|336367205|gb|EGN95550.1|/2.09795e-92/hypothetical protein SERLA73DRAFT_76651 [Serpula lacrymans var. lacrymans S7.3]
GME10984_g	EG/MA	0	0.67	0	0.67	-	-	-	-	-
GME2096_g	EG/MA	0	6.36	0	1.01	ko04120//Ubiquitin mediated proteolysis	-	GO:0003824//catalytic activity	GO:0043412//macromolecule modification	gi|336370100|gb|EGN98441.1|/2.95654e-132/hypothetical protein SERLA73DRAFT_183447 [Serpula lacrymans var. lacrymans S7.3]
GME6944_g	EG/MA	0	0.84	0	0.84	-	-	-	-	-
GME4214_g	EG/MA	0	1.17	0	0.34	ko05131//Shigellosis;ko05100//Bacterial invasion of epithelial cells;ko04062//Chemokine signaling pathway	GO:0043232	-	GO:0006897//endocytosis	gi|170086706|ref|XP_001874576.1|/0/predicted protein [Laccaria bicolor S238N-H82]
GME416_g	EG/MA	0	0.5	0	0.34	-	-	-	-	gi|238582519|ref|XP_002389957.1|/4.53442e-34/hypothetical protein MPER_10847 [Moniliophthora perniciosa FA553]
GME1768_g	EG/MA	0	0.33	0	3.52	-	GO:0031224//intrinsic to membrane	GO:0015301//anion:anion antiporter activity	GO:0006811//ion transport	gi|392591923|gb|EIW81250.1|/0/hypothetical protein CONPUDRAFT_82277 [Coniophora puteana RWD-64-598 SS2]
GME6447_g	EG/MA	0	2.01	0	0.34	-	-	-	-	gi|403416071|emb|CCM02771.1|/7.08074e-17/predicted protein [Fibroporia radiculosa]
GME1165_g	EG/MA	0	0.5	0	0.5	-	-	-	-	-
GME244_g	EG/MA	0	0.67	0	0.67	ko00642//Ethylbenzene degradation;ko01100//Metabolic pathways;ko00627//Aminobenzoate degradation;ko00051//Fructose and mannose metabolism;ko00362//Benzoate degradation;ko00240//Pyrimidine metabolism;ko00903//Limonene and pinene degradation;ko01120//Microbial metabolism in diverse environments;ko00350//Tyrosine metabolism;ko04111//Cell cycle - yeast	-	GO:0004672//protein kinase activity;GO:0032559	GO:0006464//cellular protein modification process	gi|242206840|ref|XP_002469275.1|/5.95284e-159/predicted protein [Postia placenta Mad-698-R]
GME3954_g	EG/MA	0	0.5	0	1.01	-	-	-	-	-
GME10666_g	EG/MA	0	0.5	0	0.34	-	-	-	-	gi|392562957|gb|EIW56137.1|/6.88529e-77/hypothetical protein TRAVEDRAFT_30682 [Trametes versicolor FP-101664 SS1]
GME2461_g	EG/MA	0	2.17	0	0.5	-	-	-	-	-
GME3187_g	EG/MA	0	0.5	0	0.34	-	-	-	-	gi|390596443|gb|EIN05845.1|/1.06943e-07/hypothetical protein PUNSTDRAFT_145751 [Punctularia strigosozonata HHB-11173 SS5]
GME8529_g	EG/MA	0	0.33	0	0.5	-	-	-	-	gi|389747248|gb|EIM88427.1|/1.95416e-43/hypothetical protein STEHIDRAFT_120598 [Stereum hirsutum FP-91666 SS1]
GME4130_g	EG/MA	0	0.84	0	0.34	-	-	-	-	gi|336371081|gb|EGN99421.1|/1.73582e-64/hypothetical protein SERLA73DRAFT_182390 [Serpula lacrymans var. lacrymans S7.3]
GME1065_g	EG/MA	0	0.84	0	1.84	-	-	-	-	gi|169865603|ref|XP_001839400.1|/0/ankyrin repeat protein [Coprinopsis cinerea okayama7#130]
GME1899_g	EG/MA	0	0.33	0	1.68	ko02020//Two-component system;ko01100//Metabolic pathways;ko00591//Linoleic acid metabolism;ko00051//Fructose and mannose metabolism;ko00362//Benzoate degradation;ko00363//Bisphenol degradation;ko01110//Biosynthesis of secondary metabolites;ko00903//Limonene and pinene degradation;ko00650//Butanoate metabolism;ko00626//Naphthalene degradation;ko00625//Chloroalkane and chloroalkene degradation;ko0…	-	-	-	gi|336369641|gb|EGN97982.1|/1.87985e-96/hypothetical protein SERLA73DRAFT_74243 [Serpula lacrymans var. lacrymans S7.3]
GME8178_g	EG/MA	0	0.33	0	0.5	ko03450//Non-homologous end-joining;ko03440//Homologous recombination	-	-	-	gi|170092050|ref|XP_001877247.1|/3.92951e-96/major facilitator superfamily multidrug-resistance, DHA1 sub-family [Laccaria bicolor S238N-H82]
GME1934_g	EG/MA	0	0.33	0	0.5	-	-	-	-	gi|170089933|ref|XP_001876189.1|/7.94327e-162/endoplasmic reticulum-derived transport vesicle ERV46 [Laccaria bicolor S238N-H82]
GME9356_g	EG/MA	0	0.33	0	0.84	ko03010//Ribosome	-	-	-	gi|392597846|gb|EIW87168.1|/2.40547e-17/hypothetical protein CONPUDRAFT_116293 [Coniophora puteana RWD-64-598 SS2]
GME10905_g	EG/MA	0	0.33	0	2.01	-	-	-	-	gi|170104116|ref|XP_001883272.1|/6.07928e-62/predicted protein [Laccaria bicolor S238N-H82]
GME7693_g	EG/MA	0	0.67	0	0.67	-	-	-	-	-
GME3812_g	EG/MA	0	1.84	0	0.67	-	-	-	-	gi|115433160|ref|XP_001216717.1|/9.82282e-13/predicted protein [Aspergillus terreus NIH2624]
GME2274_g	EG/MA	0	0.67	0	0.5	-	-	-	-	gi|170096178|ref|XP_001879309.1|/7.40083e-09/predicted protein [Laccaria bicolor S238N-H82]
GME8495_g	EG/MA	0	0.33	0	1.01	-	-	-	-	-
GME608_g	EG/MA	0	0.67	0	0.34	-	-	-	-	gi|302675619|ref|XP_003027493.1|/4.9879e-15/hypothetical protein SCHCODRAFT_113154 [Schizophyllum commune H4-8]
GME10404_g	EG/MA	0	0.5	0	0.34	ko00624//Polycyclic aromatic hydrocarbon degradation;ko01100//Metabolic pathways;ko00627//Aminobenzoate degradation;ko00363//Bisphenol degradation;ko01110//Biosynthesis of secondary metabolites;ko00903//Limonene and pinene degradation;ko00945//Stilbenoid, diarylheptanoid and gingerol biosynthesis;ko01120//Microbial metabolism in diverse environments;ko01100//Metabolic pathways;ko00627//Aminobenzo…	-	-	-	gi|336370804|gb|EGN99144.1|/8.27569e-92/hypothetical protein SERLA73DRAFT_181973 [Serpula lacrymans var. lacrymans S7.3]
GME2810_g	EG/MA	0	0.33	0	0.84	-	-	-	-	gi|336363180|gb|EGN91607.1|/1.22422e-48/hypothetical protein SERLA73DRAFT_192210 [Serpula lacrymans var. lacrymans S7.3]
GME5921_g	EG/MA	0	0.67	0	0.67	-	-	-	-	gi|170091314|ref|XP_001876879.1|/0/predicted protein [Laccaria bicolor S238N-H82]
GME9938_g	EG/MA	0	1.84	0	0.84	ko01100//Metabolic pathways;ko00520//Amino sugar and nucleotide sugar metabolism;ko00500//Starch and sucrose metabolism;ko01110//Biosynthesis of secondary metabolites	-	-	-	gi|170097770|ref|XP_001880104.1|/5.85491e-39/predicted protein [Laccaria bicolor S238N-H82]
GME1924_g	EG/MA	0	0.67	0	0.34	-	-	-	-	-
GME2061_g	EG/MA	0	0.33	0	0.34	-	-	-	GO:0006810//transport	gi|170089391|ref|XP_001875918.1|/1.34898e-12/predicted protein [Laccaria bicolor S238N-H82]
GME1527_g	EG/MA	0	0.33	0	0.34	-	-	-	-	gi|238582519|ref|XP_002389957.1|/6.22179e-39/hypothetical protein MPER_10847 [Moniliophthora perniciosa FA553]
GME7641_g	EG/MA	0	0.5	0	0.67	-	-	GO:0003824//catalytic activity	-	gi|170083969|ref|XP_001873208.1|/0/polysaccharide lyase family 8 protein [Laccaria bicolor S238N-H82]
GME6519_g	EG/MA	0	0.33	0	1.17	-	-	-	-	gi|389741711|gb|EIM82899.1|/4.12903e-41/hypothetical protein STEHIDRAFT_171045 [Stereum hirsutum FP-91666 SS1]
GME5599_g	EG/MA	0	0.33	0	0.34	-	-	-	-	gi|170113984|ref|XP_001888190.1|/3.26466e-30/predicted protein [Laccaria bicolor S238N-H82]
GME4101_g	EG/MA	0	0.67	0	0.67	-	-	-	-	gi|392588195|gb|EIW77527.1|/5.17891e-10/hypothetical protein CONPUDRAFT_156752 [Coniophora puteana RWD-64-598 SS2]
GME11297_g	EG/MA	0	0.33	0	0.34	-	-	-	-	gi|170083889|ref|XP_001873168.1|/5.39463e-54/predicted protein [Laccaria bicolor S238N-H82]
GME4452_g	EG/MA	0	0.67	0	0.84	-	-	-	-	gi|299743324|ref|XP_001835687.2|/1.0384e-31/hypothetical protein CC1G_03469 [Coprinopsis cinerea okayama7#130]
GME6703_g	EG/MA	0	0.33	0	1.17	-	-	GO:0005488//binding	-	gi|170111553|ref|XP_001886980.1|/0/predicted protein [Laccaria bicolor S238N-H82]
GME3660_g	EG/MA	0	0.67	0	1.34	ko02010//ABC transporters;ko04976//Bile secretion	-	GO:0017111//nucleoside-triphosphatase activity	-	gi|170099584|ref|XP_001881010.1|/0/multidrug resistance-associated ABC transporter [Laccaria bicolor S238N-H82]
GME6941_g	EG/MA	0	0.5	0	0.34	-	-	-	-	-
GME3031_g	EG/MA	0	1	0	1.17	-	-	-	-	gi|170116571|ref|XP_001889476.1|/7.44452e-26/predicted protein [Laccaria bicolor S238N-H82]
GME11882_g	EG/MA	0	0.33	0	0.5	-	-	-	-	gi|170107023|ref|XP_001884722.1|/2.76145e-63/predicted protein [Laccaria bicolor S238N-H82]
GME2670_g	EG/MA	0	0.5	0	0.34	-	-	-	-	gi|393212184|gb|EJC97686.1|/1.32929e-13/hypothetical protein FOMMEDRAFT_32448 [Fomitiporia mediterranea MF3/22]
GME1236_g	EG/MA	0	1.34	0	0.67	-	-	-	-	-
GME2187_g	EG/MA	0	0.33	0	0.5	ko02020//Two-component system;ko01100//Metabolic pathways;ko00591//Linoleic acid metabolism;ko00051//Fructose and mannose metabolism;ko00362//Benzoate degradation;ko00363//Bisphenol degradation;ko01110//Biosynthesis of secondary metabolites;ko00903//Limonene and pinene degradation;ko00650//Butanoate metabolism;ko00626//Naphthalene degradation;ko00625//Chloroalkane and chloroalkene degradation;ko0…	-	-	-	gi|390603427|gb|EIN12819.1|/2.62013e-91/Aldo/keto reductase [Punctularia strigosozonata HHB-11173 SS5]
GME6563_g	EG/MA	0	0.33	0	0.34	-	-	-	-	gi|299739310|ref|XP_001835198.2|/5.92674e-24/hypothetical protein CC1G_07340 [Coprinopsis cinerea okayama7#130]
GME5177_g	EG/MA	0	0.33	0	0.5	-	-	-	-	gi|336364135|gb|EGN92498.1|/3.9771e-79/hypothetical protein SERLA73DRAFT_190980 [Serpula lacrymans var. lacrymans S7.3]
GME11125_g	EG/MA	0	0.67	0	0.5	-	-	-	-	-
GME3545_g	EG/MA	0	0.33	0	1.17	-	-	-	-	gi|170112832|ref|XP_001887617.1|/0/predicted protein [Laccaria bicolor S238N-H82]
GME1034_g	EG/MA	0	0.33	0	0.5	-	GO:0044464//cell part	-	GO:0030001//metal ion transport	gi|395326739|gb|EJF59145.1|/3.25119e-14/Sodium/sulfate symporter [Dichomitus squalens LYAD-421 SS1]
GME3505_g	EG/MA	0	0.33	0	1.17	ko01100//Metabolic pathways;ko00624//Polycyclic aromatic hydrocarbon degradation;ko00340//Histidine metabolism;ko00623//Toluene degradation;ko00627//Aminobenzoate degradation;ko00361//Chlorocyclohexane and chlorobenzene degradation;ko00363//Bisphenol degradation;ko00903//Limonene and pinene degradation;ko00626//Naphthalene degradation;ko01120//Microbial metabolism in diverse environments;ko03018/…	-	-	-	gi|170099694|ref|XP_001881065.1|/5.50704e-143/vacuolar DHA amino acid exporter [Laccaria bicolor S238N-H82]
GME3335_g	EG/MA	0	1.51	0	0.5	-	-	-	-	gi|299740406|ref|XP_001838820.2|/5.76726e-37/hypothetical protein CC1G_08984 [Coprinopsis cinerea okayama7#130]
GME3681_g	EG/MA	0	6.86	0	0.34	ko01100//Metabolic pathways;ko00240//Pyrimidine metabolism;ko01100//Metabolic pathways;ko00564//Glycerophospholipid metabolism;ko00565//Ether lipid metabolism	-	GO:0003824//catalytic activity	GO:0008152//metabolic process	gi|302691530|ref|XP_003035444.1|/4.35399e-101/hypothetical protein SCHCODRAFT_51754 [Schizophyllum commune H4-8]
GME11622_g	EG/MA	0	1.17	0	0.34	ko05020//Prion diseases;ko04010//MAPK signaling pathway	-	-	-	gi|238597707|ref|XP_002394401.1|/3.18318e-51/hypothetical protein MPER_05711 [Moniliophthora perniciosa FA553]
GME2295_g	EG/MA	0	0.5	0	0.84	-	-	-	-	gi|347836642|emb|CCD51214.1|/1.20486e-08/hypothetical protein [Botryotinia fuckeliana]
GME9527_g	EG/MA	0	0.33	0	0.34	ko04111//Cell cycle - yeast	-	-	-	gi|170085677|ref|XP_001874062.1|/9.35617e-99/homeodomain transcription factor [Laccaria bicolor S238N-H82]
GME11948_g	EG/MA	0	0.67	0	0.84	ko00624//Polycyclic aromatic hydrocarbon degradation;ko01100//Metabolic pathways;ko00627//Aminobenzoate degradation;ko00363//Bisphenol degradation;ko01110//Biosynthesis of secondary metabolites;ko00903//Limonene and pinene degradation;ko00945//Stilbenoid, diarylheptanoid and gingerol biosynthesis;ko01120//Microbial metabolism in diverse environments;ko01100//Metabolic pathways;ko00360//Phenylalan…	-	GO:0046872//metal ion binding	-	gi|170109454|ref|XP_001885934.1|/3.76343e-129/predicted protein [Laccaria bicolor S238N-H82]
GME3082_g	EG/MA	0	0.33	0	2.68	ko01100//Metabolic pathways;ko00627//Aminobenzoate degradation;ko04111//Cell cycle - yeast;ko00740//Riboflavin metabolism;ko05152//Tuberculosis;ko00564//Glycerophospholipid metabolism;ko00562//Inositol phosphate metabolism;ko00565//Ether lipid metabolism;ko01120//Microbial metabolism in diverse environments	-	-	-	gi|389741731|gb|EIM82919.1|/1.6088e-148/phosphoglycerate mutase-like protein [Stereum hirsutum FP-91666 SS1]
GME5754_g	EG/MA	0	2.17	0	0.84	ko04141//Protein processing in endoplasmic reticulum;ko03040//Spliceosome;ko05169//Epstein-Barr virus infection;ko05134//Legionellosis;ko05164//Influenza A;ko05145//Toxoplasmosis;ko04612//Antigen processing and presentation;ko04144//Endocytosis;ko04010//MAPK signaling pathway;ko05162//Measles;ko05020//Prion diseases;ko04141//Protein processing in endoplasmic reticulum;ko05020//Prion diseases;ko03…	-	-	-	gi|170117575|ref|XP_001889974.1|/1.11455e-155/predicted protein [Laccaria bicolor S238N-H82]
GME2902_g	EG/MA	0	0.33	0	0.34	-	-	-	-	-
GME9006_g	EG/MA	0	0.33	0	1.01	-	-	-	-	gi|299748591|ref|XP_001839248.2|/2.71456e-37/hypothetical protein CC1G_12139 [Coprinopsis cinerea okayama7#130]
GME4804_g	EG/MA	0	0.5	0	0.34	ko00230//Purine metabolism;ko04113//Meiosis - yeast	-	GO:0005488//binding;GO:0016829//lyase activity	GO:0007165//signal transduction;GO:0009124//nucleoside monophosphate biosynthetic process	gi|395332855|gb|EJF65233.1|/8.33022e-20/adenylate cyclase-like protein [Dichomitus squalens LYAD-421 SS1]
GME3892_g	EG/MA	0	0.33	0	0.34	-	-	-	-	gi|299742266|ref|XP_001832353.2|/2.78347e-50/beta-glucan synthesis-associated protein SKN1 [Coprinopsis cinerea okayama7#130]
GME4633_g	EG/MA	0	0.33	0	0.67	-	-	-	-	gi|170084977|ref|XP_001873712.1|/1.40164e-34/predicted protein [Laccaria bicolor S238N-H82]
GME1558_g	EG/MA	0	0.67	0	0.67	ko04113//Meiosis - yeast	GO:0031224//intrinsic to membrane	GO:0022857//transmembrane transporter activity	GO:0006810//transport	gi|169851388|ref|XP_001832384.1|/0/hexose transporter [Coprinopsis cinerea okayama7#130]
GME7289_g	EG/MA	0	0.5	0	0.5	-	-	-	-	-
GME9140_g	EG/MA	0	0.33	0	0.34	ko04141//Protein processing in endoplasmic reticulum;ko01100//Metabolic pathways;ko00513//Various types of N-glycan biosynthesis;ko00510//N-Glycan biosynthesis	-	GO:0016787//hydrolase activity	-	gi|169855950|ref|XP_001834637.1|/6.81864e-41/mannosyl-oligosaccharide 1,2-alpha-mannosidase [Coprinopsis cinerea okayama7#130]
GME574_g	EG/MA	0	0.33	0	0.67	-	GO:0016020//membrane	-	GO:0006865//amino acid transport	gi|336368690|gb|EGN97033.1|/0/hypothetical protein SERLA73DRAFT_185320 [Serpula lacrymans var. lacrymans S7.3]
GME5071_g	EG/MA	0	0.5	0	0.5	-	-	-	-	gi|170096941|ref|XP_001879690.1|/1.01147e-89/predicted protein [Laccaria bicolor S238N-H82]
GME5282_g	EG/MA	0	0.67	0	0.34	ko01100//Metabolic pathways;ko00230//Purine metabolism;ko00330//Arginine and proline metabolism;ko00240//Pyrimidine metabolism	-	-	-	gi|302691226|ref|XP_003035292.1|/2.38348e-133/hypothetical protein SCHCODRAFT_81437 [Schizophyllum commune H4-8]
GME8779_g	EG/MA	0	0.5	0	0.67	ko02020//Two-component system;ko00630//Glyoxylate and dicarboxylate metabolism;ko00250//Alanine, aspartate and glutamate metabolism;ko01100//Metabolic pathways;ko00330//Arginine and proline metabolism;ko00910//Nitrogen metabolism;ko00790//Folate biosynthesis;ko00061//Fatty acid biosynthesis;ko01120//Microbial metabolism in diverse environments	GO:0044424//intracellular part	GO:0003933//GTP cyclohydrolase activity	GO:0009396//folic acid-containing compound biosynthetic process	gi|336373257|gb|EGO01595.1|/2.4293e-78/hypothetical protein SERLA73DRAFT_48385 [Serpula lacrymans var. lacrymans S7.3]
GME2012_g	EG/MA	0	1.17	0	0.67	ko01100//Metabolic pathways;ko00520//Amino sugar and nucleotide sugar metabolism;ko00500//Starch and sucrose metabolism;ko01110//Biosynthesis of secondary metabolites	-	GO:0003824//catalytic activity	-	gi|49333361|gb|AAT64005.1|/7.92924e-144/endoglucanase II [Volvariella volvacea]
GME2809_g	EG/MA	0	0.5	0	0.34	-	-	-	-	gi|336378442|gb|EGO19600.1|/7.01975e-60/hypothetical protein SERLADRAFT_402103 [Serpula lacrymans var. lacrymans S7.9]
GME10694_g	EG/MA	0	0.84	0	0.34	-	-	-	-	gi|238582519|ref|XP_002389957.1|/1.13989e-19/hypothetical protein MPER_10847 [Moniliophthora perniciosa FA553]
GME5861_g	EG/MA	0	0.5	0	0.84	ko04623//Cytosolic DNA-sensing pathway;ko01100//Metabolic pathways;ko00230//Purine metabolism;ko05169//Epstein-Barr virus infection;ko03020//RNA polymerase;ko00240//Pyrimidine metabolism	-	-	-	gi|403416602|emb|CCM03302.1|/4.74101e-39/predicted protein [Fibroporia radiculosa]
GME7900_g	EG/MA	0	0.84	0	1.17	-	-	-	-	gi|169853756|ref|XP_001833556.1|/2.04171e-07/hypothetical protein CC1G_11762 [Coprinopsis cinerea okayama7#130]
GME5610_g	EG/MA	0	0.33	0	0.34	-	-	-	-	-
GME11661_g	EG/MA	0	0.33	0	0.34	-	-	-	-	gi|170084889|ref|XP_001873668.1|/4.31624e-98/predicted protein [Laccaria bicolor S238N-H82]
GME10265_g	EG/MA	0	0.67	0	1.17	-	-	-	-	gi|393221365|gb|EJD06850.1|/1.1215e-54/hypothetical protein FOMMEDRAFT_152172 [Fomitiporia mediterranea MF3/22]
GME2881_g	EG/MA	0	1	0	1.51	-	-	-	-	gi|392562385|gb|EIW55565.1|/3.69567e-29/hypothetical protein TRAVEDRAFT_151958 [Trametes versicolor FP-101664 SS1]
GME11409_g	EG/MA	0	0.5	0	0.5	-	-	-	-	gi|403418456|emb|CCM05156.1|/7.47095e-47/predicted protein [Fibroporia radiculosa]
GME4655_g	EG/MA	0	0.5	0	0.34	ko01100//Metabolic pathways;ko00071//Fatty acid metabolism;ko01110//Biosynthesis of secondary metabolites;ko00626//Naphthalene degradation;ko00010//Glycolysis / Gluconeogenesis;ko00625//Chloroalkane and chloroalkene degradation;ko00350//Tyrosine metabolism;ko01120//Microbial metabolism in diverse environments	-	-	-	gi|170109697|ref|XP_001886055.1|/1.92256e-56/predicted protein [Laccaria bicolor S238N-H82]
GME9033_g	EG/MA	0	0.67	0	0.5	-	-	-	-	-
GME9395_g	EG/MA	0	0.84	0	0.34	-	-	GO:0016787//hydrolase activity	GO:0044238//primary metabolic process	gi|390604921|gb|EIN14312.1|/0/hypothetical protein PUNSTDRAFT_49130 [Punctularia strigosozonata HHB-11173 SS5]
GME5075_g	EG/MA	0	0.67	0	0.67	-	-	-	-	gi|302679942|ref|XP_003029653.1|/1.27646e-108/hypothetical protein SCHCODRAFT_69401 [Schizophyllum commune H4-8]
GME8955_g	EG/MA	0	0.67	0	0.34	-	-	GO:0046914//transition metal ion binding;GO:0003677//DNA binding;GO:0001071//nucleic acid binding transcription factor activity	GO:0006351//transcription, DNA-dependent	gi|170097681|ref|XP_001880060.1|/1.43139e-142/siderophore biosynthesis regulatory protein [Laccaria bicolor S238N-H82]
GME3027_g	EG/MA	0	0.5	0	1.01	-	-	-	-	gi|336387635|gb|EGO28780.1|/3.34409e-07/hypothetical protein SERLADRAFT_434679 [Serpula lacrymans var. lacrymans S7.9]
GME11615_g	EG/MA	0	1	0	1.34	-	-	-	-	gi|170086047|ref|XP_001874247.1|/3.95728e-156/predicted protein [Laccaria bicolor S238N-H82]
GME667_g	EG/MA	0	0.5	0	0.34	-	GO:0016020//membrane	-	-	gi|170098392|ref|XP_001880415.1|/4.62959e-56/predicted protein [Laccaria bicolor S238N-H82]
GME9091_g	EG/MA	0	0.33	0	0.34	ko03013//RNA transport	-	-	-	gi|336366643|gb|EGN94989.1|/0/hypothetical protein SERLA73DRAFT_61618 [Serpula lacrymans var. lacrymans S7.3]
GME11082_g	EG/MA	0	0.84	0	0.5	-	-	-	-	gi|299746420|ref|XP_002911048.1|/4.01905e-25/other/AgaK1 protein kinase [Coprinopsis cinerea okayama7#130]
GME10985_g	EG/MA	0	0.33	0	0.67	-	-	-	-	-
GME9204_g	EG/MA	0	1	0	2.01	ko03040//Spliceosome	GO:0043231//intracellular membrane-bounded organelle	-	-	gi|169865061|ref|XP_001839135.1|/7.60268e-83/maternal g10 transcript [Coprinopsis cinerea okayama7#130]
GME3370_g	EG/MA	0	0.33	0	1.68	-	-	-	-	gi|302692918|ref|XP_003036138.1|/3.84272e-07/hypothetical protein SCHCODRAFT_232771 [Schizophyllum commune H4-8]
GME214_g	EG/MA	0	0.33	0	1.01	-	-	-	-	-
GME9724_g	EG/MA	0	0.67	0	0.67	ko03050//Proteasome;ko05160//Hepatitis C;ko04612//Antigen processing and presentation	-	-	-	gi|302698253|ref|XP_003038805.1|/7.21396e-16/hypothetical protein SCHCODRAFT_104309 [Schizophyllum commune H4-8]
GME5827_g	EG/MA	0	0.67	0	0.5	-	-	-	-	-
GME3822_g	EG/MA	0	0.67	0	0.67	-	-	GO:0016787//hydrolase activity	-	gi|141493223|gb|ABL98208.2|/1.23958e-102/serine protease [Hypsizygus marmoreus]
GME11558_g	EG/MA	0	0.5	0	1.01	-	-	-	-	gi|336387811|gb|EGO28955.1|/3.85651e-106/hypothetical protein SERLADRAFT_412679 [Serpula lacrymans var. lacrymans S7.9]
GME4245_g	EG/MA	0	1	0	0.34	-	-	-	-	-
GME2392_g	EG/MA	0	0.84	0	0.34	-	GO:0043229//intracellular organelle	GO:0003824//catalytic activity	GO:0019725//cellular homeostasis	gi|392562498|gb|EIW55678.1|/5.00571e-65/AhpC-TSA-domain-containing protein [Trametes versicolor FP-101664 SS1]
GME10670_g	EG/MA	0	0.84	0	0.34	-	-	-	-	gi|299748370|ref|XP_001839084.2|/5.35918e-06/hypothetical protein CC1G_10649 [Coprinopsis cinerea okayama7#130]
GME5222_g	EG/MA	0	0.5	0	3.02	-	-	-	-	gi|170109101|ref|XP_001885758.1|/1.53375e-38/predicted protein [Laccaria bicolor S238N-H82]
GME8153_g	EG/MA	0	0.33	0	0.67	-	-	-	-	gi|170099407|ref|XP_001880922.1|/7.9282e-17/predicted protein [Laccaria bicolor S238N-H82]
GME6264_g	EG/MA	0	0.33	0	1.01	-	-	-	-	gi|299746057|ref|XP_001837702.2|/9.22558e-137/hypothetical protein CC1G_06908 [Coprinopsis cinerea okayama7#130]
GME11876_g	EG/MA	0	0.67	0	0.67	-	-	-	-	-
GME7576_g	EG/MA	0	0.33	0	0.67	-	-	-	-	gi|169857558|ref|XP_001835427.1|/3.78442e-176/hypothetical protein CC1G_05389 [Coprinopsis cinerea okayama7#130]
GME7162_g	EG/MA	0	0.5	0	0.67	-	-	-	-	gi|238583265|ref|XP_002390187.1|/4.62923e-66/hypothetical protein MPER_10579 [Moniliophthora perniciosa FA553]
GME4489_g	EG/MA	0	0.33	0	0.34	ko04910//Insulin signaling pathway;ko01100//Metabolic pathways;ko04070//Phosphatidylinositol signaling system;ko00562//Inositol phosphate metabolism;ko04141//Protein processing in endoplasmic reticulum;ko01100//Metabolic pathways;ko00513//Various types of N-glycan biosynthesis;ko00510//N-Glycan biosynthesis	-	GO:0016788//hydrolase activity, acting on ester bonds	-	gi|299741114|ref|XP_001834226.2|/0/polyphosphoinositide phosphatase [Coprinopsis cinerea okayama7#130]
GME3132_g	EG/MA	0	1	0	0.34	ko00624//Polycyclic aromatic hydrocarbon degradation;ko01100//Metabolic pathways;ko00627//Aminobenzoate degradation;ko00363//Bisphenol degradation;ko01110//Biosynthesis of secondary metabolites;ko00903//Limonene and pinene degradation;ko00945//Stilbenoid, diarylheptanoid and gingerol biosynthesis;ko01120//Microbial metabolism in diverse environments;ko01100//Metabolic pathways;ko00360//Phenylalan…	-	GO:0016491//oxidoreductase activity;GO:0005506//iron ion binding	-	gi|170116547|ref|XP_001889464.1|/1.20938e-161/cytochrome P450 [Laccaria bicolor S238N-H82]
GME5765_g	EG/MA	0	1.51	0	0.34	-	-	-	-	gi|169865603|ref|XP_001839400.1|/0/ankyrin repeat protein [Coprinopsis cinerea okayama7#130]
GME6197_g	EG/MA	0	0.33	0	0.67	ko01100//Metabolic pathways;ko00330//Arginine and proline metabolism;ko00780//Biotin metabolism;ko00970//Aminoacyl-tRNA biosynthesis	GO:0044424//intracellular part	GO:0004812//aminoacyl-tRNA ligase activity;GO:0032559	GO:0006418//tRNA aminoacylation for protein translation	gi|169862181|ref|XP_001837721.1|/0/seryl-tRNA synthetase [Coprinopsis cinerea okayama7#130]
GME10741_g	EG/MA	0	0.33	0	0.34	-	-	-	-	gi|170117808|ref|XP_001890089.1|/2.55313e-47/predicted protein [Laccaria bicolor S238N-H82]
GME10742_g	EG/MA	0	0.67	0	0.34	-	-	-	-	gi|170087070|ref|XP_001874758.1|/3.35456e-30/predicted protein [Laccaria bicolor S238N-H82]
GME10942_g	EG/MA	0	0.5	0	0.34	-	-	-	-	-
GME10235_g	EG/MA	0	0.5	0	1.17	-	-	-	-	-
GME8824_g	EG/MA	0	0.5	0	1.17	ko01100//Metabolic pathways;ko00240//Pyrimidine metabolism	-	GO:0016812//hydrolase activity, acting on carbon-nitrogen (but not peptide) bonds, in cyclic amides	GO:0006206//pyrimidine nucleobase metabolic process	gi|302697111|ref|XP_003038234.1|/2.23533e-153/hypothetical protein SCHCODRAFT_48899 [Schizophyllum commune H4-8]
GME8574_g	EG/MA	0	1.84	0	0.34	ko01100//Metabolic pathways;ko00360//Phenylalanine metabolism;ko00400//Phenylalanine, tyrosine and tryptophan biosynthesis;ko01110//Biosynthesis of secondary metabolites;ko00130//Ubiquinone and other terpenoid-quinone biosynthesis;ko00300//Lysine biosynthesis;ko00270//Cysteine and methionine metabolism;ko00380//Tryptophan metabolism;ko00350//Tyrosine metabolism	-	-	-	gi|395329911|gb|EJF62296.1|/9.93735e-144/PLP-dependent transferase [Dichomitus squalens LYAD-421 SS1]
GME3030_g	EG/MA	0	1	0	0.34	-	-	-	-	-
GME10931_g	EG/MA	0	0.33	0	0.34	-	-	-	-	-
GME9029_g	EG/MA	0	1.17	0	0.34	-	GO:0044424//intracellular part	GO:0046914//transition metal ion binding;GO:0016627//oxidoreductase activity, acting on the CH-CH group of donors;GO:0050662//coenzyme binding	GO:0006399//tRNA metabolic process	gi|392560397|gb|EIW53580.1|/0/zinc finger dihydrouridine synthase [Trametes versicolor FP-101664 SS1]
GME5908_g	EG/MA	0	0.33	0	0.67	-	GO:0044464//cell part	-	-	gi|390601620|gb|EIN11014.1|/1.90191e-131/hypothetical protein PUNSTDRAFT_85507 [Punctularia strigosozonata HHB-11173 SS5]
GME758_g	EG/MA	0	0.33	0	0.5	-	-	-	-	gi|238597573|ref|XP_002394362.1|/3.33954e-69/hypothetical protein MPER_05757 [Moniliophthora perniciosa FA553]
GME4144_g	EG/MA	0	0.33	0	0.34	-	-	GO:0004672//protein kinase activity;GO:0032559	GO:0006464//cellular protein modification process	gi|170086630|ref|XP_001874538.1|/0/predicted protein [Laccaria bicolor S238N-H82]
GME9446_g	EG/MA	0	0.67	0	0.34	-	-	-	-	gi|169845393|ref|XP_001829416.1|/4.18746e-101/hypothetical protein CC1G_00595 [Coprinopsis cinerea okayama7#130]
GME6569_g	EG/MA	0	0.5	0	2.35	-	-	-	-	gi|170101957|ref|XP_001882195.1|/1.89645e-57/predicted protein [Laccaria bicolor S238N-H82]
GME11677_g	EG/MA	0	0.33	0	1.01	-	-	-	-	gi|392572049|gb|EIW65221.1|/2.11276e-31/hypothetical protein TRAVEDRAFT_68765 [Trametes versicolor FP-101664 SS1]
GME9683_g	EG/MA	0	0.5	0	0.34	-	-	-	-	gi|170085557|ref|XP_001874002.1|/4.66137e-162/predicted protein [Laccaria bicolor S238N-H82]
GME3665_g	EG/MA	0	1	0	0.34	ko01100//Metabolic pathways;ko03010//Ribosome;ko00051//Fructose and mannose metabolism	-	GO:0003824//catalytic activity;GO:0046914//transition metal ion binding	GO:0008152//metabolic process	gi|392561676|gb|EIW54857.1|/2.44161e-40/GroES-like protein [Trametes versicolor FP-101664 SS1]
GME3122_g	EG/MA	0	0.33	0	0.34	-	-	-	-	gi|393238577|gb|EJD46113.1|/6.10997e-39/hypothetical protein AURDEDRAFT_184447 [Auricularia delicata TFB-10046 SS5]
GME10906_g	EG/MA	0	1	0	0.34	-	-	-	-	gi|170104116|ref|XP_001883272.1|/3.64426e-61/predicted protein [Laccaria bicolor S238N-H82]
GME9098_g	EG/MA	0	0.33	0	0.34	ko01100//Metabolic pathways;ko00563//Glycosylphosphatidylinositol(GPI)-anchor biosynthesis	GO:0016020//membrane	GO:0003824//catalytic activity	-	gi|336364293|gb|EGN92654.1|/0/hypothetical protein SERLA73DRAFT_117102 [Serpula lacrymans var. lacrymans S7.3]
GME2439_g	EG/MA	0	1.51	0	0.5	ko03450//Non-homologous end-joining;ko03410//Base excision repair;ko03030//DNA replication	GO:0005634//nucleus	GO:0004518//nuclease activity	GO:0009987//cellular process	gi|317374947|sp|A8NQC2.3|FEN1_COPC7/1.19771e-139/RecName: Full=Flap endonuclease 1; Short=FEN-1; AltName: Full=Flap structure-specific endonuclease 1
GME9635_g	EG/MA	0	0.84	0	0.34	-	-	-	-	gi|170084407|ref|XP_001873427.1|/2.09456e-40/predicted protein [Laccaria bicolor S238N-H82]
GME9245_g	EG/MA	0	0.33	0	1.17	-	-	-	-	gi|170097037|ref|XP_001879738.1|/5.90746e-27/predicted protein [Laccaria bicolor S238N-H82]
GME5963_g	EG/MA	0	0.33	0	0.5	-	-	-	-	gi|336387606|gb|EGO28751.1|/4.9067e-27/hypothetical protein SERLADRAFT_359944 [Serpula lacrymans var. lacrymans S7.9]
GME3372_g	EG/MA	0	0.67	0	0.67	-	-	-	-	gi|299738443|ref|XP_001838357.2|/1.99611e-08/hypothetical protein CC1G_04801 [Coprinopsis cinerea okayama7#130]
GME2696_g	EG/MA	0	0.33	0	1.01	-	-	-	-	gi|336369430|gb|EGN97771.1|/6.85803e-82/hypothetical protein SERLA73DRAFT_109000 [Serpula lacrymans var. lacrymans S7.3]
GME1191_g	EG/MA	0	0.5	0	0.84	-	-	-	-	-
GME370_g	EG/MA	0	0.5	0	0.5	-	-	-	-	-
GME11988_g	EG/MA	0	0.33	0	1.34	-	-	-	-	-
GME7254_g	EG/MA	0	0.33	0	0.34	-	-	-	-	gi|238582519|ref|XP_002389957.1|/1.2094e-36/hypothetical protein MPER_10847 [Moniliophthora perniciosa FA553]
GME804_g	EG/MA	0	0.67	0	0.34	-	-	GO:0046872//metal ion binding;GO:0004601//peroxidase activity	GO:0006950//response to stress;GO:0044237//cellular metabolic process	gi|222154058|gb|ACM47219.1|/1.13814e-131/manganese peroxidase 3 [Pleurotus ostreatus]
GME5901_g	EG/MA	0	0.84	0	0.34	-	-	-	-	gi|170108848|ref|XP_001885632.1|/1.07785e-84/predicted protein [Laccaria bicolor S238N-H82]
GME1338_g	EG/MA	0	0.33	0	0.34	-	-	-	-	-
GME9114_g	EG/MA	0	0.67	0	0.34	-	-	-	-	gi|170109101|ref|XP_001885758.1|/1.69371e-56/predicted protein [Laccaria bicolor S238N-H82]
GME3629_g	EG/MA	0	1	0	0.34	-	-	-	-	gi|170100192|ref|XP_001881314.1|/1.03731e-06/predicted protein [Laccaria bicolor S238N-H82]
GME4663_g	EG/MA	0	0.33	0	3.52	ko00520//Amino sugar and nucleotide sugar metabolism;ko01110//Biosynthesis of secondary metabolites	-	GO:0003824//catalytic activity	-	gi|220682959|gb|ACL80318.1|/4.16217e-129/acetyl xylan esterase II [Volvariella volvacea]
GME3689_g	EG/MA	0	0.33	0	0.34	-	-	-	-	gi|170101985|ref|XP_001882209.1|/4.78599e-16/predicted protein [Laccaria bicolor S238N-H82]
GME4998_g	EG/MA	0	1.34	0	0.34	-	-	-	-	-
GME5242_g	EG/MA	0	0.33	0	0.34	-	-	-	-	gi|336381769|gb|EGO22920.1|/6.34341e-31/hypothetical protein SERLADRAFT_416477 [Serpula lacrymans var. lacrymans S7.9]
GME6191_g	EG/MA	0	0.33	0	0.34	ko04260//Cardiac muscle contraction;ko05416//Viral myocarditis;ko05410//Hypertrophic cardiomyopathy (HCM);ko04270//Vascular smooth muscle contraction;ko04530//Tight junction;ko05132//Salmonella infection;ko04810//Regulation of actin cytoskeleton;ko05414//Dilated cardiomyopathy	-	-	-	gi|390595897|gb|EIN05301.1|/9.29183e-70/hypothetical protein PUNSTDRAFT_128059 [Punctularia strigosozonata HHB-11173 SS5]
GME1842_g	EG/MA	0	0.5	0	0.34	-	-	-	-	gi|299748604|ref|XP_001839259.2|/1.03627e-11/other/FunK1 protein kinase [Coprinopsis cinerea okayama7#130]
GME2464_g	EG/MA	0	0.5	0	0.34	ko01100//Metabolic pathways;ko00052//Galactose metabolism;ko00740//Riboflavin metabolism;ko00500//Starch and sucrose metabolism;ko03040//Spliceosome	-	-	-	gi|302502262|ref|XP_003013122.1|/6.25743e-40/hypothetical protein ARB_00667 [Arthroderma benhamiae CBS 112371]
GME7626_g	EG/MA	0	0.67	0	0.34	-	-	-	-	-
GME7100_g	EG/MA	0	0.33	0	0.34	-	-	-	-	-
GME12036_g	EG/MA	0	0.67	0	0.5	-	-	-	-	gi|170096758|ref|XP_001879599.1|/1.02174e-23/predicted protein [Laccaria bicolor S238N-H82]
GME3404_g	EG/MA	0	0.33	0	2.01	ko01100//Metabolic pathways;ko00540//Lipopolysaccharide biosynthesis;ko01110//Biosynthesis of secondary metabolites;ko00460//Cyanoamino acid metabolism;ko03010//Ribosome;ko00940//Phenylpropanoid biosynthesis;ko00500//Starch and sucrose metabolism;ko00511//Other glycan degradation;ko00970//Aminoacyl-tRNA biosynthesis	-	GO:0016798//hydrolase activity, acting on glycosyl bonds	GO:0044238//primary metabolic process	gi|336386484|gb|EGO27630.1|/0/glycoside hydrolase family 3 protein [Serpula lacrymans var. lacrymans S7.9]
GME7776_g	EG/MA	0	0.5	0	0.34	ko01100//Metabolic pathways;ko00270//Cysteine and methionine metabolism;ko00290//Valine, leucine and isoleucine biosynthesis;ko01110//Biosynthesis of secondary metabolites;ko00260//Glycine, serine and threonine metabolism;ko01100//Metabolic pathways;ko00290//Valine, leucine and isoleucine biosynthesis;ko00270//Cysteine and methionine metabolism;ko01110//Biosynthesis of secondary metabolites;ko002…	-	-	-	gi|299753845|ref|XP_001833571.2|/1.44236e-99/hypothetical protein CC1G_03788 [Coprinopsis cinerea okayama7#130]
GME3644_g	EG/MA	0	0.5	0	0.84	-	-	-	-	gi|299742121|ref|XP_001832269.2|/2.84123e-85/hypothetical protein CC1G_02531 [Coprinopsis cinerea okayama7#130]
GME9301_g	EG/MA	0	0.33	0	6.87	-	-	-	-	gi|389746301|gb|EIM87481.1|/9.8448e-59/hypothetical protein STEHIDRAFT_156445 [Stereum hirsutum FP-91666 SS1]
GME4284_g	EG/MA	0	0.84	0	0.67	-	-	-	-	gi|170086812|ref|XP_001874629.1|/2.41124e-37/predicted protein [Laccaria bicolor S238N-H82]
GME4993_g	EG/MA	0	0.84	0	1.17	-	-	-	-	gi|170096987|ref|XP_001879713.1|/1.19752e-125/predicted protein [Laccaria bicolor S238N-H82]
GME7785_g	EG/MA	0	0.67	0	0.34	-	GO:0031224//intrinsic to membrane	GO:0015291//secondary active transmembrane transporter activity	GO:0015698//inorganic anion transport	gi|170094702|ref|XP_001878572.1|/0/sulfate permease [Laccaria bicolor S238N-H82]
GME626_g	EG/MA	0	0.33	0	0.5	-	-	-	-	gi|169847812|ref|XP_001830615.1|/7.36332e-11/hypothetical protein CC1G_06881 [Coprinopsis cinerea okayama7#130]
GME2397_g	EG/MA	0	0.33	0	0.34	-	-	-	-	gi|380470859|emb|CCF47552.1|/5.99302e-142/hypothetical protein CH063_04196 [Colletotrichum higginsianum]
GME5895_g	EG/MA	0	0.33	0	0.5	-	-	-	-	gi|392564186|gb|EIW57364.1|/5.06539e-105/terpenoid synthase [Trametes versicolor FP-101664 SS1]
GME6161_g	EG/MA	0	0.33	0	0.34	-	-	-	-	gi|302672759|ref|XP_003026067.1|/2.9121e-08/expressed protein [Schizophyllum commune H4-8]
GME8312_g	EG/MA	0	1	0	0.34	-	-	-	-	gi|296424494|ref|XP_002841783.1|/6.75002e-82/hypothetical protein [Tuber melanosporum Mel28]
GME6762_g	EG/MA	0	0.84	0	0.5	ko04111//Cell cycle - yeast;ko04113//Meiosis - yeast;ko05200//Pathways in cancer;ko04011//MAPK signaling pathway - yeast;ko05216//Thyroid cancer;ko03013//RNA transport	-	-	-	gi|242210152|ref|XP_002470920.1|/2.15187e-20/predicted protein [Postia placenta Mad-698-R]
GME9349_g	EG/MA	0	1	0	5.19	-	-	-	-	gi|238599790|ref|XP_002394975.1|/9.74995e-53/hypothetical protein MPER_05054 [Moniliophthora perniciosa FA553]
GME368_g	EG/MA	0	0.33	0	0.34	-	-	-	-	gi|336368413|gb|EGN96756.1|/2.75763e-20/hypothetical protein SERLA73DRAFT_161770 [Serpula lacrymans var. lacrymans S7.3]
GME10200_g	EG/MA	0	0.33	0	0.84	-	-	-	-	gi|299748806|ref|XP_001840160.2|/1.74045e-27/hypothetical protein CC1G_02623 [Coprinopsis cinerea okayama7#130]
GME382_g	EG/MA	0	0.33	0	0.34	-	-	-	-	gi|170100655|ref|XP_001881545.1|/4.15084e-52/predicted protein [Laccaria bicolor S238N-H82]
GME6405_g	EG/MA	0	1	0	1.68	ko01100//Metabolic pathways;ko00052//Galactose metabolism;ko00520//Amino sugar and nucleotide sugar metabolism;ko01120//Microbial metabolism in diverse environments;ko00020//Citrate cycle (TCA cycle);ko01110//Biosynthesis of secondary metabolites	-	GO:0016772//transferase activity, transferring phosphorus-containing groups	GO:0044237//cellular metabolic process	gi|170104775|ref|XP_001883601.1|/5.15378e-83/galactokinase gal [Laccaria bicolor S238N-H82]
GME7096_g	EG/MA	0	0.5	0	0.5	-	-	-	-	gi|299749296|ref|XP_001838653.2|/1.44931e-36/hypothetical protein CC1G_07844 [Coprinopsis cinerea okayama7#130]
GME5002_g	EG/MA	0	0.33	0	1.17	-	-	-	-	gi|170108854|ref|XP_001885635.1|/6.88873e-57/predicted protein [Laccaria bicolor S238N-H82]
GME8850_g	EG/MA	0	0.33	0	0.5	ko00624//Polycyclic aromatic hydrocarbon degradation;ko01100//Metabolic pathways;ko00627//Aminobenzoate degradation;ko00363//Bisphenol degradation;ko01110//Biosynthesis of secondary metabolites;ko00903//Limonene and pinene degradation;ko00945//Stilbenoid, diarylheptanoid and gingerol biosynthesis;ko01120//Microbial metabolism in diverse environments;ko01100//Metabolic pathways;ko00590//Arachidoni…	-	-	-	gi|336363954|gb|EGN92321.1|/1.69896e-148/hypothetical protein SERLA73DRAFT_117507 [Serpula lacrymans var. lacrymans S7.3]
GME5676_g	EG/MA	0	1.34	0	0.34	-	-	-	-	gi|302683160|ref|XP_003031261.1|/7.99397e-113/hypothetical protein SCHCODRAFT_82436 [Schizophyllum commune H4-8]
GME1224_g	BU/MA	0.53	0	0	0.34	-	-	-	-	-
GME5_g	BU/MA	1.6	0	0	0.34	ko01100//Metabolic pathways;ko00520//Amino sugar and nucleotide sugar metabolism;ko00500//Starch and sucrose metabolism;ko01110//Biosynthesis of secondary metabolites	-	GO:0003824//catalytic activity	-	gi|389738166|gb|EIM79367.1|/5.1774e-107/hypothetical protein STEHIDRAFT_126501 [Stereum hirsutum FP-91666 SS1]
GME10232_g	BU/MA	0.36	0	0	2.35	ko04140//Regulation of autophagy	-	-	-	gi|395331345|gb|EJF63726.1|/1.41588e-82/hypothetical protein DICSQDRAFT_101697 [Dichomitus squalens LYAD-421 SS1]
GME8367_g	BU/MA	0.53	0	0	0.67	-	GO:0043234//protein complex	GO:0005515//protein binding	GO:0044267//cellular protein metabolic process	gi|170090692|ref|XP_001876568.1|/1.40711e-47/predicted protein [Laccaria bicolor S238N-H82]
GME8174_g	BU/MA	0.71	0	0	2.51	ko00624//Polycyclic aromatic hydrocarbon degradation;ko01100//Metabolic pathways;ko00627//Aminobenzoate degradation;ko00363//Bisphenol degradation;ko01110//Biosynthesis of secondary metabolites;ko00903//Limonene and pinene degradation;ko00945//Stilbenoid, diarylheptanoid and gingerol biosynthesis;ko01120//Microbial metabolism in diverse environments;ko01100//Metabolic pathways;ko00627//Aminobenzo…	-	-	-	gi|336383561|gb|EGO24710.1|/1.08455e-156/hypothetical protein SERLADRAFT_349023 [Serpula lacrymans var. lacrymans S7.9]
GME6740_g	BU/MA	0.36	0	0	0.34	-	-	-	-	gi|169846148|ref|XP_001829790.1|/6.40929e-31/hypothetical protein CC1G_05999 [Coprinopsis cinerea okayama7#130]
GME2056_g	BU/MA	0.53	0	0	0.5	-	-	-	-	gi|395330474|gb|EJF62857.1|/1.45616e-80/metalloprotease [Dichomitus squalens LYAD-421 SS1]
GME6050_g	BU/MA	0.36	0	0	0.34	ko02020//Two-component system;ko00720//Carbon fixation pathways in prokaryotes;ko01100//Metabolic pathways;ko01110//Biosynthesis of secondary metabolites;ko00640//Propanoate metabolism;ko00620//Pyruvate metabolism;ko00010//Glycolysis / Gluconeogenesis;ko00520//Amino sugar and nucleotide sugar metabolism;ko00680//Methane metabolism;ko01120//Microbial metabolism in diverse environments	-	GO:0003824//catalytic activity;GO:0000166//nucleotide binding	-	gi|336365013|gb|EGN93365.1|/0/hypothetical protein SERLA73DRAFT_97775 [Serpula lacrymans var. lacrymans S7.3]
GME1828_g	BU/MA	1.25	0	0	0.5	-	-	-	-	-
GME1346_g	BU/MA	1.25	0	0	0.34	-	-	-	-	gi|402216572|gb|EJT96658.1|/9.5528e-40/hypothetical protein DACRYDRAFT_85650 [Dacryopinax sp. DJM-731 SS1]
GME6632_g	BU/MA	1.07	0	0	2.51	ko01100//Metabolic pathways;ko00624//Polycyclic aromatic hydrocarbon degradation;ko00340//Histidine metabolism;ko00540//Lipopolysaccharide biosynthesis;ko01120//Microbial metabolism in diverse environments;ko00350//Tyrosine metabolism;ko01100//Metabolic pathways;ko00052//Galactose metabolism;ko00051//Fructose and mannose metabolism;ko00600//Sphingolipid metabolism;ko00400//Phenylalanine, tyrosine…	-	GO:0004553//hydrolase activity, hydrolyzing O-glycosyl compounds	GO:0008152//metabolic process	gi|302684635|ref|XP_003031998.1|/0/glycoside hydrolase family 35 protein [Schizophyllum commune H4-8]
GME11046_g	BU/MA	0.53	0	0	5.53	-	-	-	-	gi|389747227|gb|EIM88406.1|/5.11312e-57/hypothetical protein STEHIDRAFT_167702 [Stereum hirsutum FP-91666 SS1]
GME10680_g	BU/MA	0.36	0	0	1.51	-	-	-	-	gi|88192499|pdb|2BWM|A/1.45134e-103/Chain A, 1.8a Crystal Structure Of Of Psathyrella Velutina Lectin In Complex With Methyl 2-Acetamido-1,2-Dideoxy-1-Seleno-Beta- D-Glucopyranoside
GME3285_g	BU/MA	0.36	0	0	0.84	-	-	-	-	gi|302680216|ref|XP_003029790.1|/2.01898e-31/hypothetical protein SCHCODRAFT_82970 [Schizophyllum commune H4-8]
GME4530_g	BU/MA	0.36	0	0	1.68	-	-	-	-	gi|392587359|gb|EIW76693.1|/6.00161e-114/amidohydrolase 2 [Coniophora puteana RWD-64-598 SS2]
GME9077_g	BU/MA	0.36	0	0	1.17	-	-	-	-	gi|238582519|ref|XP_002389957.1|/8.95306e-42/hypothetical protein MPER_10847 [Moniliophthora perniciosa FA553]
GME11036_g	BU/MA	23.7	0	0	0.34	ko04141//Protein processing in endoplasmic reticulum	-	-	GO:0050896//response to stimulus	gi|169846538|ref|XP_001829984.1|/7.75644e-57/small heat shock protein [Coprinopsis cinerea okayama7#130]
GME8599_g	BU/MA	0.36	0	0	0.5	ko03015//mRNA surveillance pathway;ko03013//RNA transport	-	-	-	gi|170090852|ref|XP_001876648.1|/5.02915e-34/predicted protein [Laccaria bicolor S238N-H82]
GME4474_g	BU/MA	0.53	0	0	0.5	-	-	-	-	gi|336374564|gb|EGO02901.1|/3.58554e-59/hypothetical protein SERLA73DRAFT_165830 [Serpula lacrymans var. lacrymans S7.3]
GME3643_g	BU/MA	1.07	0	0	0.5	-	-	-	-	gi|169851610|ref|XP_001832494.1|/1.84418e-83/hypothetical protein CC1G_03508 [Coprinopsis cinerea okayama7#130]
GME10693_g	BU/MA	0.53	0	0	0.5	-	-	-	-	gi|299748936|ref|XP_001840254.2|/6.01112e-16/NWD2 [Coprinopsis cinerea okayama7#130]
GME9166_g	BU/MA	0.36	0	0	0.34	-	-	-	-	gi|389744519|gb|EIM85702.1|/7.19243e-140/hypothetical protein STEHIDRAFT_158325 [Stereum hirsutum FP-91666 SS1]
GME305_g	BU/MA	0.36	0	0	0.67	-	-	-	-	gi|393220345|gb|EJD05831.1|/1.84927e-12/pali-domain-containing protein [Fomitiporia mediterranea MF3/22]
GME11821_g	BU/MA	0.36	0	0	0.5	-	-	-	-	gi|393216144|gb|EJD01635.1|/2.27213e-30/hypothetical protein FOMMEDRAFT_158789 [Fomitiporia mediterranea MF3/22]
GME10679_g	BU/MA	0.36	0	0	0.5	-	-	-	-	gi|88192499|pdb|2BWM|A/3.3334e-106/Chain A, 1.8a Crystal Structure Of Of Psathyrella Velutina Lectin In Complex With Methyl 2-Acetamido-1,2-Dideoxy-1-Seleno-Beta- D-Glucopyranoside
GME9876_g	BU/MA	6.77	0	0	3.52	ko01040//Biosynthesis of unsaturated fatty acids	-	GO:0003824//catalytic activity	GO:0044238//primary metabolic process	gi|336363801|gb|EGN92173.1|/0/hypothetical protein SERLA73DRAFT_191518 [Serpula lacrymans var. lacrymans S7.3]
GME7832_g	BU/MA	1.07	0	0	0.5	-	-	-	-	gi|302692552|ref|XP_003035955.1|/4.52592e-34/hypothetical protein SCHCODRAFT_105576 [Schizophyllum commune H4-8]
GME8431_g	BU/MA	0.71	0	0	0.34	-	-	-	-	gi|170091064|ref|XP_001876754.1|/0/predicted protein [Laccaria bicolor S238N-H82]
GME7662_g	BU/MA	0.36	0	0	1.17	-	-	-	-	-
GME10138_g	BU/MA	0.36	0	0	0.34	-	-	-	-	gi|170092511|ref|XP_001877477.1|/2.71368e-62/predicted protein [Laccaria bicolor S238N-H82]
GME11619_g	BU/MA	0.36	0	0	0.34	ko00430//Taurine and hypotaurine metabolism	-	GO:0016701//oxidoreductase activity, acting on single donors with incorporation of molecular oxygen	GO:0008152//metabolic process	gi|336374373|gb|EGO02710.1|/5.35273e-145/hypothetical protein SERLA73DRAFT_102611 [Serpula lacrymans var. lacrymans S7.3]
GME792_g	BU/MA	0.36	0	0	1.01	-	-	GO:0003824//catalytic activity	GO:0009987//cellular process	gi|390604291|gb|EIN13682.1|/7.89162e-69/S-adenosyl-L-methionine-dependent methyltransferase [Punctularia strigosozonata HHB-11173 SS5]
GME8248_g	BU/MA	0.36	0	0	0.67	-	-	-	-	gi|336364846|gb|EGN93199.1|/2.38873e-23/hypothetical protein SERLA73DRAFT_78806 [Serpula lacrymans var. lacrymans S7.3]
GME6570_g	BU/MA	0.36	0	0	5.36	-	-	-	-	gi|170113984|ref|XP_001888190.1|/6.89765e-66/predicted protein [Laccaria bicolor S238N-H82]
GME6350_g	BU/MA	0.36	0	0	0.34	-	-	-	-	gi|299742324|ref|XP_001832391.2|/5.52364e-09/hypothetical protein CC1G_07651 [Coprinopsis cinerea okayama7#130]
GME9434_g	BU/MA	0.53	0	0	0.84	-	-	-	-	gi|170102671|ref|XP_001882551.1|/8.41573e-42/predicted protein [Laccaria bicolor S238N-H82]
GME6948_g	BU/MA	1.6	0	0	0.67	-	-	-	-	gi|170087794|ref|XP_001875120.1|/7.64808e-12/predicted protein [Laccaria bicolor S238N-H82]
GME10420_g	BU/MA	0.71	0	0	1.01	ko00624//Polycyclic aromatic hydrocarbon degradation;ko01100//Metabolic pathways;ko00627//Aminobenzoate degradation;ko00363//Bisphenol degradation;ko01110//Biosynthesis of secondary metabolites;ko00903//Limonene and pinene degradation;ko00945//Stilbenoid, diarylheptanoid and gingerol biosynthesis;ko01120//Microbial metabolism in diverse environments;ko00071//Fatty acid metabolism;ko00627//Aminobe…	-	GO:0046872//metal ion binding	-	gi|336375338|gb|EGO03674.1|/1.26155e-99/hypothetical protein SERLA73DRAFT_101917 [Serpula lacrymans var. lacrymans S7.3]
GME5170_g	BU/MA	0.89	0	0	0.84	-	-	-	-	gi|170109667|ref|XP_001886040.1|/8.69328e-39/predicted protein [Laccaria bicolor S238N-H82]
GME1018_g	BU/MA	0.36	0	0	0.5	-	-	-	-	gi|392561986|gb|EIW55167.1|/2.58746e-11/hypothetical protein TRAVEDRAFT_79184, partial [Trametes versicolor FP-101664 SS1]
GME2416_g	BU/MA	0.53	0	0	0.34	-	-	-	-	gi|300431582|tpe|CBL43327.1|/2.35415e-37/TPA: arylamine N-acetyltransferase 1 [Coprinopsis cinerea]
GME9613_g	BU/MA	0.71	0	0	2.01	-	-	-	-	gi|170085619|ref|XP_001874033.1|/0/WD40 containing SNARE-dependent exocytosis protein [Laccaria bicolor S238N-H82]
GME461_g	BU/MA	0.53	0	0	1.34	-	-	-	-	gi|392565044|gb|EIW58221.1|/8.0848e-11/hypothetical protein TRAVEDRAFT_47389 [Trametes versicolor FP-101664 SS1]
GME9271_g	BU/MA	0.53	0	0	0.84	-	-	-	-	gi|169850061|ref|XP_001831728.1|/1.43133e-30/DUF636 domain-containing protein [Coprinopsis cinerea okayama7#130]
GME10024_g	BU/MA	0.36	0	0	1.51	-	-	-	-	gi|336375667|gb|EGO04003.1|/5.76945e-18/hypothetical protein SERLA73DRAFT_69800 [Serpula lacrymans var. lacrymans S7.3]
GME9113_g	BU/MA	0.36	0	0	0.67	-	-	-	-	gi|170102765|ref|XP_001882598.1|/1.21348e-139/predicted protein [Laccaria bicolor S238N-H82]
GME10971_g	BU/MA	0.36	0	0	0.67	-	-	-	-	gi|170116892|ref|XP_001889635.1|/2.08975e-06/predicted protein [Laccaria bicolor S238N-H82]
GME4209_g	BU/MA	0.71	0	0	0.84	-	-	-	-	-
GME9533_g	BU/MA	0.53	0	0	1.34	ko03018//RNA degradation	-	-	-	gi|170084433|ref|XP_001873440.1|/4.50646e-41/predicted protein [Laccaria bicolor S238N-H82]
GME1505_g	BU/MA	0.36	0	0	2.68	-	-	-	-	gi|395328131|gb|EJF60525.1|/5.83343e-13/hypothetical protein DICSQDRAFT_181243 [Dichomitus squalens LYAD-421 SS1]
GME3394_g	BU/MA	0.36	0	0	1.01	-	-	-	-	gi|299740310|ref|XP_002910308.1|/1.19742e-14/hypothetical protein CC1G_15737 [Coprinopsis cinerea okayama7#130]
GME85_g	BU/MA	0.89	0	0	0.67	-	-	-	-	-
GME3843_g	BU/MA	0.71	0	0	0.34	ko01040//Biosynthesis of unsaturated fatty acids;ko00062//Fatty acid elongation;ko01110//Biosynthesis of secondary metabolites	GO:0044424//intracellular part;GO:0031224//intrinsic to membrane	GO:0016491//oxidoreductase activity	GO:0044238//primary metabolic process	gi|170103607|ref|XP_001883018.1|/3.79974e-128/predicted protein [Laccaria bicolor S238N-H82]
GME5244_g	BU/MA	0.71	0	0	0.67	-	-	GO:0017111//nucleoside-triphosphatase activity;GO:0000166//nucleotide binding	-	gi|170109829|ref|XP_001886121.1|/2.88544e-155/predicted protein [Laccaria bicolor S238N-H82]
GME2433_g	BU/MA	0.53	0	0	0.5	ko05031//Amphetamine addiction;ko04744//Phototransduction;ko04745//Phototransduction - fly;ko04916//Melanogenesis;ko05152//Tuberculosis;ko04720//Long-term potentiation;ko04020//Calcium signaling pathway;ko04626//Plant-pathogen interaction;ko04270//Vascular smooth muscle contraction;ko05133//Pertussis;ko04971//Gastric acid secretion;ko05214//Glioma;ko04910//Insulin signaling pathway;ko04970//Saliv…	-	GO:0046872//metal ion binding	-	gi|328770436|gb|EGF80478.1|/8.62337e-52/calmodulin [Batrachochytrium dendrobatidis JAM81]
GME2525_g	BU/MA	0.53	0	0	9.05	-	-	-	-	gi|170107715|ref|XP_001885067.1|/2.79177e-09/predicted protein [Laccaria bicolor S238N-H82]
GME11051_g	BU/MA	0.53	0	0	4.19	-	-	-	-	gi|238607406|ref|XP_002396967.1|/7.7232e-75/hypothetical protein MPER_02689 [Moniliophthora perniciosa FA553]
GME1601_g	BU/MA	0.71	0	0	0.84	-	-	-	-	gi|336364517|gb|EGN92874.1|/2.07871e-65/hypothetical protein SERLA73DRAFT_116725 [Serpula lacrymans var. lacrymans S7.3]
GME3169_g	BU/MA	0.71	0	0	1.84	-	-	-	-	-
GME2140_g	BU/MA	1.25	0	0	1.17	ko04120//Ubiquitin mediated proteolysis;ko03420//Nucleotide excision repair	-	-	-	gi|170090007|ref|XP_001876226.1|/0/predicted protein [Laccaria bicolor S238N-H82]
GME10401_g	BU/MA	0.71	0	0	0.34	-	-	-	-	gi|170115339|ref|XP_001888864.1|/1.64709e-80/predicted protein [Laccaria bicolor S238N-H82]
GME4190_g	BU/MA	0.36	0	0	0.34	ko04978//Mineral absorption	-	-	-	gi|105671481|gb|ABF74685.1|/1.33008e-91/CDF zinc transporter [Hebeloma cylindrosporum]
GME9729_g	BU/MA	1.07	0	0	1.68	-	-	-	-	gi|242219304|ref|XP_002475433.1|/3.70148e-54/predicted protein [Postia placenta Mad-698-R]
GME8360_g	BU/MA	0.36	0	0	0.34	-	-	GO:0016787//hydrolase activity	-	gi|169861600|ref|XP_001837434.1|/2.42698e-134/Usp36 protein [Coprinopsis cinerea okayama7#130]
GME11383_g	BU/MA	1.25	0	0	0.67	ko00100//Steroid biosynthesis;ko01100//Metabolic pathways;ko00364//Fluorobenzoate degradation;ko00623//Toluene degradation;ko00361//Chlorocyclohexane and chlorobenzene degradation;ko01120//Microbial metabolism in diverse environments;ko01110//Biosynthesis of secondary metabolites	-	GO:0003824//catalytic activity	-	gi|393218444|gb|EJD03932.1|/1.39076e-82/dienelactone hydrolase [Fomitiporia mediterranea MF3/22]
GME8506_g	BU/MA	0.36	0	0	1.34	-	-	-	-	gi|336373579|gb|EGO01917.1|/8.54806e-72/hypothetical protein SERLA73DRAFT_177548 [Serpula lacrymans var. lacrymans S7.3]
GME2236_g	BU/MA	0.53	0	0	0.67	-	-	-	-	-
GME11711_g	BU/MA	0.36	0	0	0.34	-	-	-	-	gi|170085367|ref|XP_001873907.1|/1.74122e-50/predicted protein [Laccaria bicolor S238N-H82]
GME9929_g	BU/MA	0.36	0	0	0.5	ko01100//Metabolic pathways;ko00270//Cysteine and methionine metabolism;ko00290//Valine, leucine and isoleucine biosynthesis;ko01110//Biosynthesis of secondary metabolites;ko00260//Glycine, serine and threonine metabolism	-	GO:0016841//ammonia-lyase activity;GO:0048037//cofactor binding	GO:0006549//isoleucine metabolic process	gi|170093045|ref|XP_001877744.1|/2.31016e-149/predicted protein [Laccaria bicolor S238N-H82]
GME738_g	BU/MA	0.71	0	0	0.34	ko02020//Two-component system;ko02010//ABC transporters;ko01100//Metabolic pathways;ko03010//Ribosome;ko00520//Amino sugar and nucleotide sugar metabolism;ko00540//Lipopolysaccharide biosynthesis;ko01110//Biosynthesis of secondary metabolites	-	GO:0016861//intramolecular oxidoreductase activity, interconverting aldoses and ketoses	GO:0006041//glucosamine metabolic process	gi|390605226|gb|EIN14617.1|/1.55385e-123/glucosamine-6-phosphate isomerase [Punctularia strigosozonata HHB-11173 SS5]
GME386_g	BU/MA	0.36	0	0	0.67	-	-	-	-	gi|242210917|ref|XP_002471299.1|/8.74779e-13/predicted protein [Postia placenta Mad-698-R]
GME8380_g	BU/MA	0.89	0	0	0.67	-	-	-	-	gi|336373672|gb|EGO02010.1|/8.67629e-52/hypothetical protein SERLA73DRAFT_50095 [Serpula lacrymans var. lacrymans S7.3]
GME5056_g	BU/MA	0.89	0	0	0.67	-	-	-	-	-
GME9757_g	BU/MA	0.53	0	0	0.34	-	-	GO:0005488//binding	-	gi|299756092|ref|XP_001829083.2|/0/SHREC complex subunit Mit1 [Coprinopsis cinerea okayama7#130]
GME10083_g	BU/MA	0.71	0	0	0.67	ko00620//Pyruvate metabolism;ko01100//Metabolic pathways;ko00630//Glyoxylate and dicarboxylate metabolism;ko01120//Microbial metabolism in diverse environments	-	GO:0016747//transferase activity, transferring acyl groups other than amino-acyl groups;GO:0046912//transferase activity, transferring acyl groups, acyl groups converted into alkyl on transfer	GO:0009060//aerobic respiration;GO:0044262//cellular carbohydrate metabolic process	gi|170093381|ref|XP_001877912.1|/0/malate synthase [Laccaria bicolor S238N-H82]
GME2415_g	BU/MA	0.53	0	0	0.84	-	-	-	-	-
GME4411_g	BU/MA	0.36	0	0	0.34	-	-	-	-	gi|169848197|ref|XP_001830806.1|/1.12865e-48/metalloprotease [Coprinopsis cinerea okayama7#130]
GME4863_g	BU/MA	0.36	0	0	0.34	-	-	-	-	-
GME2755_g	BU/MA	0.53	0	0	0.67	-	-	-	-	-
GME11708_g	BU/MA	0.71	0	0	0.67	-	-	-	-	gi|336378301|gb|EGO19459.1|/6.16289e-32/hypothetical protein SERLADRAFT_442935 [Serpula lacrymans var. lacrymans S7.9]
GME6853_g	BU/MA	0.36	0	0	0.84	ko00230//Purine metabolism;ko01100//Metabolic pathways;ko00330//Arginine and proline metabolism;ko00480//Glutathione metabolism	GO:0044424//intracellular part	GO:0008238//exopeptidase activity	GO:0019538//protein metabolic process	gi|242200625|gb|ACS88344.1|/6.01951e-136/proline iminopeptidase [Phanerochaete chrysosporium]
GME165_g	BU/MA	0.53	0	0	0.67	-	-	-	-	gi|393222115|gb|EJD07599.1|/7.00238e-40/hypothetical protein FOMMEDRAFT_16246 [Fomitiporia mediterranea MF3/22]
GME11156_g	BU/MA	0.36	0	0	1.34	-	-	-	-	gi|302690856|ref|XP_003035107.1|/4.94258e-59/hypothetical protein SCHCODRAFT_14275 [Schizophyllum commune H4-8]
GME2455_g	BU/MA	0.71	0	0	0.5	-	-	-	-	-
GME6575_g	BU/MA	0.36	0	0	0.34	-	-	-	-	-
GME8661_g	BU/MA	1.25	0	0	0.34	ko03050//Proteasome;ko05169//Epstein-Barr virus infection	GO:0022624	-	GO:0019538//protein metabolic process	gi|170091090|ref|XP_001876767.1|/3.39172e-110/predicted protein [Laccaria bicolor S238N-H82]
GME2590_g	BU/MA	0.36	0	0	2.01	-	-	-	-	gi|170109986|ref|XP_001886199.1|/2.10836e-124/predicted protein [Laccaria bicolor S238N-H82]
GME3395_g	BU/MA	0.36	0	0	0.34	-	GO:0043231//intracellular membrane-bounded organelle	-	-	gi|299740310|ref|XP_002910308.1|/6.75413e-13/hypothetical protein CC1G_15737 [Coprinopsis cinerea okayama7#130]
GME8792_g	BU/MA	0.36	0	0	0.34	ko03320//PPAR signaling pathway	-	GO:0005504//fatty acid binding	-	gi|299747372|ref|XP_001836994.2|/4.42964e-97/hypothetical protein CC1G_00130 [Coprinopsis cinerea okayama7#130]
GME2820_g	BU/MA	0.89	0	0	0.34	-	-	-	-	gi|170087788|ref|XP_001875117.1|/2.96042e-12/predicted protein [Laccaria bicolor S238N-H82]
GME9877_g	BU/MA	7.48	0	0	1.51	ko01040//Biosynthesis of unsaturated fatty acids	-	GO:0003824//catalytic activity	GO:0044238//primary metabolic process	gi|348599986|dbj|BAL02933.1|/3.14672e-160/delta-12 fatty acid desaturase [Pholiota nameko]
GME6172_g	BU/MA	0.89	0	0	1.84	ko00310//Lysine degradation;ko00310//Lysine degradation	-	GO:0003824//catalytic activity	GO:0008152//metabolic process	gi|170095249|ref|XP_001878845.1|/3.54977e-151/gamma-butyrobetaine hydroxylase [Laccaria bicolor S238N-H82]
GME7755_g	BU/MA	0.53	0	0	0.34	-	-	-	-	gi|169854112|ref|XP_001833733.1|/5.54886e-40/hypothetical protein CC1G_11518 [Coprinopsis cinerea okayama7#130]
GME1234_g	BU/MA	0.36	0	0	0.84	-	-	-	-	gi|302688339|ref|XP_003033849.1|/5.3075e-09/expressed protein [Schizophyllum commune H4-8]
GME9315_g	BU/MA	0.36	0	0	0.5	-	-	-	-	gi|403417483|emb|CCM04183.1|/1.1528e-07/predicted protein [Fibroporia radiculosa]
GME9861_g	BU/MA	1.07	0	0	0.34	-	-	-	-	gi|170105998|ref|XP_001884211.1|/6.53874e-91/predicted protein [Laccaria bicolor S238N-H82]
GME1142_g	BU/MA	0.89	0	0	0.5	-	-	GO:0016772//transferase activity, transferring phosphorus-containing groups	GO:0044237//cellular metabolic process	gi|170090660|ref|XP_001876552.1|/2.10977e-74/predicted protein [Laccaria bicolor S238N-H82]
GME2975_g	BU/MA	1.25	0	0	0.67	ko00052//Galactose metabolism	-	GO:0003824//catalytic activity	GO:0008152//metabolic process	gi|336374763|gb|EGO03100.1|/3.63073e-114/hypothetical protein SERLA73DRAFT_176616 [Serpula lacrymans var. lacrymans S7.3]
GME9187_g	BU/MA	0.36	0	0	1.17	-	-	-	-	gi|154282645|ref|XP_001542118.1|/2.72796e-09/predicted protein [Ajellomyces capsulatus NAm1]
GME9911_g	BU/MA	0.36	0	0	0.84	ko02010//ABC transporters;ko01100//Metabolic pathways;ko00230//Purine metabolism;ko01120//Microbial metabolism in diverse environments	-	GO:0046914//transition metal ion binding;GO:0016812//hydrolase activity, acting on carbon-nitrogen (but not peptide) bonds, in cyclic amides	GO:0000255//allantoin metabolic process	gi|336371376|gb|EGN99715.1|/4.68349e-173/hypothetical protein SERLA73DRAFT_167610 [Serpula lacrymans var. lacrymans S7.3]
GME1681_g	BU/MA	1.6	0	0	0.5	-	-	-	-	-
GME5808_g	BU/MA	0.36	0	0	1.51	-	-	-	-	-
GME668_g	BU/MA	2.85	0	0	0.67	-	-	-	-	gi|170097934|ref|XP_001880186.1|/3.38195e-151/predicted protein [Laccaria bicolor S238N-H82]
GME3525_g	BU/MA	0.36	0	0	1.01	-	-	-	-	-
GME5284_g	BU/MA	0.36	0	0	1.17	-	-	-	-	gi|389748823|gb|EIM90000.1|/3.05319e-16/hypothetical protein STEHIDRAFT_119068 [Stereum hirsutum FP-91666 SS1]
GME6673_g	BU/EL	7.48	0	0.33	0	-	-	-	-	-
GME9599_g	BU/EL	1.07	0	0.5	0	-	-	-	-	gi|170084367|ref|XP_001873407.1|/4.62123e-123/predicted protein [Laccaria bicolor S238N-H82]
GME4891_g	BU/EL	0.36	0	0.84	0	-	-	GO:0016798//hydrolase activity, acting on glycosyl bonds	GO:0009251//glucan catabolic process	gi|169866037|ref|XP_001839612.1|/6.81602e-156/cellobiohydrolase [Coprinopsis cinerea okayama7#130]
GME6815_g	BU/EL	0.71	0	0.67	0	-	-	-	-	gi|170098823|ref|XP_001880630.1|/1.92655e-50/predicted protein [Laccaria bicolor S238N-H82]
GME2738_g	BU/EL	0.36	0	0.67	0	-	-	-	-	gi|336368413|gb|EGN96756.1|/1.82987e-09/hypothetical protein SERLA73DRAFT_161770 [Serpula lacrymans var. lacrymans S7.3]
GME8766_g	BU/EL	1.43	0	0.84	0	ko00624//Polycyclic aromatic hydrocarbon degradation;ko01100//Metabolic pathways;ko00627//Aminobenzoate degradation;ko00363//Bisphenol degradation;ko01110//Biosynthesis of secondary metabolites;ko00903//Limonene and pinene degradation;ko00945//Stilbenoid, diarylheptanoid and gingerol biosynthesis;ko01120//Microbial metabolism in diverse environments;ko00100//Steroid biosynthesis;ko01100//Metaboli…	-	-	-	gi|336365283|gb|EGN93634.1|/3.85277e-126/hypothetical protein SERLA73DRAFT_189361 [Serpula lacrymans var. lacrymans S7.3]
GME927_g	BU/EL	0.36	0	0.5	0	ko01100//Metabolic pathways;ko00920//Sulfur metabolism;ko00230//Purine metabolism	-	-	-	gi|170092361|ref|XP_001877402.1|/6.41138e-99/predicted protein [Laccaria bicolor S238N-H82]
GME11695_g	BU/EL	0.53	0	0.5	0	-	-	-	-	gi|299755872|ref|XP_001828939.2|/2.26029e-74/hypothetical protein CC1G_03733 [Coprinopsis cinerea okayama7#130]
GME9030_g	BU/EL	0.36	0	0.67	0	-	-	-	-	-
GME2333_g	BU/EL	1.07	0	0.33	0	ko01100//Metabolic pathways;ko00623//Toluene degradation;ko00627//Aminobenzoate degradation;ko00361//Chlorocyclohexane and chlorobenzene degradation;ko01120//Microbial metabolism in diverse environments;ko00643//Styrene degradation;ko01100//Metabolic pathways;ko00460//Cyanoamino acid metabolism;ko00910//Nitrogen metabolism;ko00627//Aminobenzoate degradation;ko00380//Tryptophan metabolism;ko01120/…	-	GO:0003824//catalytic activity	GO:0008152//metabolic process	gi|170092024|ref|XP_001877234.1|/8.87711e-34/predicted protein [Laccaria bicolor S238N-H82]
GME6192_g	BU/EL	0.36	0	1.84	0	ko04111//Cell cycle - yeast	-	-	-	gi|170109432|ref|XP_001885923.1|/2.82706e-17/predicted protein [Laccaria bicolor S238N-H82]
GME2844_g	BU/EL	0.53	0	0.33	0	-	-	-	-	gi|336363180|gb|EGN91607.1|/2.42227e-56/hypothetical protein SERLA73DRAFT_192210 [Serpula lacrymans var. lacrymans S7.3]
GME7105_g	BU/EL	0.36	0	0.33	0	ko03015//mRNA surveillance pathway;ko03013//RNA transport	-	GO:0017111//nucleoside-triphosphatase activity;GO:0032559	-	gi|170095291|ref|XP_001878866.1|/6.87555e-163/predicted protein [Laccaria bicolor S238N-H82]
GME4587_g	BU/EL	0.53	0	0.33	0	-	-	GO:0003676//nucleic acid binding;GO:0034062//RNA polymerase activity	GO:0010467//gene expression	gi|403413111|emb|CCL99811.1|/0/predicted protein [Fibroporia radiculosa]
GME9697_g	BU/EL	0.36	0	0.33	0	-	-	-	-	gi|299756156|ref|XP_001829133.2|/3.13047e-68/mitochondrial protein required for respiration [Coprinopsis cinerea okayama7#130]
GME10921_g	BU/EL	0.36	0	0.33	0	-	-	-	-	gi|389749226|gb|EIM90403.1|/2.74935e-143/hypothetical protein STEHIDRAFT_119409 [Stereum hirsutum FP-91666 SS1]
GME11861_g	BU/EL	0.89	0	0.67	0	-	-	-	-	-
GME6840_g	BU/EL	0.36	0	0.84	0	ko04113//Meiosis - yeast	GO:0031224//intrinsic to membrane	GO:0022857//transmembrane transporter activity	GO:0071702	gi|393221636|gb|EJD07121.1|/0/general substrate transporter [Fomitiporia mediterranea MF3/22]
GME6082_g	BU/EL	0.36	0	0.33	0	ko04146//Peroxisome	-	-	-	gi|170107498|ref|XP_001884959.1|/2.878e-89/predicted protein [Laccaria bicolor S238N-H82]
GME2909_g	BU/EL	0.36	0	0.5	0	-	-	-	-	gi|170116886|ref|XP_001889632.1|/2.56242e-75/predicted protein [Laccaria bicolor S238N-H82]
GME1024_g	BU/EL	0.71	0	0.5	0	-	-	-	-	gi|403418747|emb|CCM05447.1|/2.12062e-62/predicted protein [Fibroporia radiculosa]
GME3554_g	BU/EL	1.07	0	0.33	0	ko03008//Ribosome biogenesis in eukaryotes	GO:0043231//intracellular membrane-bounded organelle	GO:0017111//nucleoside-triphosphatase activity;GO:0032561//guanyl ribonucleotide binding;GO:0032559	GO:0022613//ribonucleoprotein complex biogenesis;GO:0009207	gi|299743930|ref|XP_002910724.1|/0/GTP binding protein [Coprinopsis cinerea okayama7#130]
GME1589_g	BU/EL	0.36	0	0.33	0	-	-	-	-	gi|170100030|ref|XP_001881233.1|/1.22066e-58/predicted protein [Laccaria bicolor S238N-H82]
GME5430_g	BU/EL	0.36	0	1.17	0	-	-	-	-	gi|170087358|ref|XP_001874902.1|/1.33946e-72/LisH motif-containing protein [Laccaria bicolor S238N-H82]
GME3440_g	BU/EL	0.36	0	0.5	0	-	-	-	-	-
GME1188_g	BU/EL	0.36	0	1	0	-	-	-	-	gi|299748485|ref|XP_001839173.2|/1.194e-14/hypothetical protein CC1G_07888 [Coprinopsis cinerea okayama7#130]
GME6628_g	BU/EL	0.53	0	0.5	0	-	-	-	-	gi|169847832|ref|XP_001830625.1|/2.29919e-73/metalloprotease [Coprinopsis cinerea okayama7#130]
GME5841_g	BU/EL	0.36	0	0.5	0	-	-	GO:0005488//binding	-	gi|390599063|gb|EIN08460.1|/9.17876e-72/hypothetical protein PUNSTDRAFT_69177 [Punctularia strigosozonata HHB-11173 SS5]
GME1180_g	BU/EL	1.07	0	0.33	0	-	-	-	-	gi|302675615|ref|XP_003027491.1|/1.19108e-23/hypothetical protein SCHCODRAFT_113151 [Schizophyllum commune H4-8]
GME7259_g	BU/EL	0.53	0	0.5	0	ko04623//Cytosolic DNA-sensing pathway;ko01100//Metabolic pathways;ko00230//Purine metabolism;ko05169//Epstein-Barr virus infection;ko03020//RNA polymerase;ko00240//Pyrimidine metabolism	-	-	-	gi|299750875|ref|XP_001829899.2|/9.80822e-43/RNA polymerase subunit [Coprinopsis cinerea okayama7#130]
GME8631_g	BU/EL	0.36	0	0.33	0	ko03013//RNA transport	-	-	-	gi|170091932|ref|XP_001877188.1|/1.69275e-83/predicted protein [Laccaria bicolor S238N-H82]
GME3562_g	BU/EL	1.07	0	1	0	-	-	-	-	-
GME4715_g	BU/EL	0.36	0	0.33	0	-	-	-	-	-
GME1500_g	BU/EL	0.36	0	0.33	0	-	-	-	-	gi|170104417|ref|XP_001883422.1|/3.682e-27/predicted protein [Laccaria bicolor S238N-H82]
GME4495_g	BU/EL	0.36	0	0.84	0	-	-	-	-	gi|299741082|ref|XP_001834206.2|/4.56136e-53/hypothetical protein CC1G_09706 [Coprinopsis cinerea okayama7#130]
GME5157_g	BU/EL	0.71	0	0.5	0	-	-	-	-	-
GME5295_g	BU/EL	1.25	0	1.51	0	ko03060//Protein export	-	-	-	gi|169852976|ref|XP_001833170.1|/3.91599e-43/hypothetical protein CC1G_01232 [Coprinopsis cinerea okayama7#130]
GME540_g	BU/EL	0.71	0	0.33	0	-	-	-	-	-
GME11786_g	BU/EL	0.53	0	0.5	0	-	-	-	-	-
GME2638_g	BU/EL	0.36	0	0.33	0	ko04120//Ubiquitin mediated proteolysis	-	-	-	gi|170109422|ref|XP_001885918.1|/0/predicted protein [Laccaria bicolor S238N-H82]
GME12027_g	BU/EL	4.81	0	1.17	0	-	-	-	-	gi|395323882|gb|EJF56335.1|/1.1963e-102/hypothetical protein DICSQDRAFT_71699, partial [Dichomitus squalens LYAD-421 SS1]
GME7078_g	BU/EL	0.71	0	0.5	0	-	-	-	-	gi|299746290|ref|XP_001837874.2|/3.23186e-126/hypothetical protein CC1G_09856 [Coprinopsis cinerea okayama7#130]
GME1135_g	BU/EL	0.36	0	1	0	-	GO:0043231//intracellular membrane-bounded organelle	GO:0000989//transcription factor binding transcription factor activity	GO:0032501//multicellular organismal process	gi|170106117|ref|XP_001884270.1|/6.58074e-73/predicted protein [Laccaria bicolor S238N-H82]
GME8190_g	BU/EL	0.36	0	0.33	0	-	-	-	-	gi|170103344|ref|XP_001882887.1|/3.17523e-33/predicted protein [Laccaria bicolor S238N-H82]
GME8230_g	BU/EL	0.36	0	0.33	0	-	-	-	-	gi|170098997|ref|XP_001880717.1|/1.43569e-26/predicted protein [Laccaria bicolor S238N-H82]
GME8051_g	BU/EL	0.53	0	0.5	0	ko03040//Spliceosome	-	GO:0032559;GO:0042623//ATPase activity, coupled	-	gi|170088270|ref|XP_001875358.1|/0/predicted protein [Laccaria bicolor S238N-H82]
GME9458_g	BU/EL	0.36	0	0.84	0	ko04146//Peroxisome	-	-	-	gi|170086009|ref|XP_001874228.1|/2.51687e-73/predicted protein [Laccaria bicolor S238N-H82]
GME670_g	BU/EL	0.53	0	0.33	0	-	-	-	-	-
GME11385_g	BU/EL	0.36	0	1.84	0	ko01100//Metabolic pathways;ko00360//Phenylalanine metabolism;ko04975//Fat digestion and absorption;ko00400//Phenylalanine, tyrosine and tryptophan biosynthesis;ko01110//Biosynthesis of secondary metabolites;ko00960//Tropane, piperidine and pyridine alkaloid biosynthesis;ko00950//Isoquinoline alkaloid biosynthesis;ko00250//Alanine, aspartate and glutamate metabolism;ko00710//Carbon fixation in ph…	-	GO:0048037//cofactor binding;GO:0008483//transaminase activity	GO:0019752//carboxylic acid metabolic process	gi|170085195|ref|XP_001873821.1|/0/glutamic oxaloacetic transaminase AAT1 [Laccaria bicolor S238N-H82]
GME2047_g	BU/EL	0.36	0	0.67	0	-	-	-	-	gi|336381317|gb|EGO22469.1|/1.57327e-12/hypothetical protein SERLADRAFT_409958 [Serpula lacrymans var. lacrymans S7.9]
GME6236_g	BU/EL	0.36	0	0.33	0	-	-	-	-	-
GME3181_g	BU/EL	1.07	0	0.67	0	-	-	-	-	-
GME191_g	BU/EL	0.36	0	0.33	0	-	-	-	-	gi|299745405|ref|XP_001831693.2|/1.55334e-74/hypothetical protein CC1G_05764 [Coprinopsis cinerea okayama7#130]
GME7205_g	BU/EL	0.36	0	0.5	0	-	-	-	-	gi|392571891|gb|EIW65063.1|/5.44992e-37/hypothetical protein TRAVEDRAFT_112216 [Trametes versicolor FP-101664 SS1]
GME8836_g	BU/EL	1.6	0	0.5	0	-	-	-	-	gi|299747973|ref|XP_001837373.2|/8.02118e-99/hypothetical protein CC1G_01285 [Coprinopsis cinerea okayama7#130]
GME9845_g	BU/EL	0.36	0	0.33	0	ko01100//Metabolic pathways;ko00310//Lysine degradation;ko01110//Biosynthesis of secondary metabolites;ko01100//Metabolic pathways;ko03010//Ribosome;ko00330//Arginine and proline metabolism;ko00480//Glutathione metabolism;ko00270//Cysteine and methionine metabolism;ko00410//beta-Alanine metabolism	-	GO:0003824//catalytic activity	GO:0008152//metabolic process	gi|170116922|ref|XP_001889650.1|/8.38241e-41/predicted protein [Laccaria bicolor S238N-H82]
GME4166_g	BU/EL	0.71	0	0.67	0	-	-	-	-	gi|170087768|ref|XP_001875107.1|/0/predicted protein [Laccaria bicolor S238N-H82]
GME4955_g	BU/EL	0.71	0	0.33	0	-	-	-	-	gi|403419570|emb|CCM06270.1|/4.67275e-39/predicted protein [Fibroporia radiculosa]
GME1570_g	BU/EL	0.36	0	0.84	0	-	-	-	-	-
GME10166_g	BU/EL	1.07	0	0.5	0	-	-	GO:0016787//hydrolase activity	-	gi|302678687|ref|XP_003029026.1|/3.67268e-97/hypothetical protein SCHCODRAFT_70082 [Schizophyllum commune H4-8]
GME10059_g	BU/EG/EL	1.6	0.84	1.67	0	-	-	GO:0005488//binding	-	gi|390601985|gb|EIN11378.1|/1.28296e-87/hypothetical protein PUNSTDRAFT_111550 [Punctularia strigosozonata HHB-11173 SS5]
GME4882_g	BU/EG/EL	2.14	2.84	0.67	0	ko00624//Polycyclic aromatic hydrocarbon degradation;ko01100//Metabolic pathways;ko00627//Aminobenzoate degradation;ko00363//Bisphenol degradation;ko01110//Biosynthesis of secondary metabolites;ko00903//Limonene and pinene degradation;ko00945//Stilbenoid, diarylheptanoid and gingerol biosynthesis;ko01120//Microbial metabolism in diverse environments;ko01100//Metabolic pathways;ko00590//Arachidoni…	-	-	-	gi|336374675|gb|EGO03012.1|/1.19103e-128/hypothetical protein SERLA73DRAFT_176502 [Serpula lacrymans var. lacrymans S7.3]
GME4135_g	BU/EG/EL	0.71	0.33	0.33	0	-	-	-	-	gi|302686244|ref|XP_003032802.1|/2.62618e-10/expressed protein [Schizophyllum commune H4-8]
GME11408_g	BU/EG/EL	0.36	0.33	1.51	0	ko05016//Huntington's disease;ko01100//Metabolic pathways;ko00190//Oxidative phosphorylation;ko05010//Alzheimer's disease;ko05012//Parkinson's disease	-	-	-	gi|170084013|ref|XP_001873230.1|/5.63243e-78/predicted protein [Laccaria bicolor S238N-H82]
GME10669_g	BU/EG/EL	0.36	0.5	0.33	0	-	-	-	-	-
GME7253_g	BU/EG/EL	1.43	1.67	0.33	0	-	-	-	-	-
GME9837_g	BU/EG/EL	2.32	4.01	0.67	0	-	-	-	-	gi|170098538|ref|XP_001880488.1|/1.91493e-60/hypothetical proline-rich protein [Laccaria bicolor S238N-H82]
GME325_g	BU/EG/EL	1.6	2.01	0.67	0	-	-	-	-	gi|170087698|ref|XP_001875072.1|/3.47476e-70/predicted protein [Laccaria bicolor S238N-H82]
GME2051_g	BU/EG/EL	3.92	1.67	5.02	0	-	-	-	-	gi|336370092|gb|EGN98433.1|/2.93444e-56/hypothetical protein SERLA73DRAFT_161207 [Serpula lacrymans var. lacrymans S7.3]
GME7021_g	BU/EG/EL	3.92	4.68	0.33	0	-	-	-	-	gi|395327635|gb|EJF60033.1|/4.36726e-28/hypothetical protein DICSQDRAFT_171519 [Dichomitus squalens LYAD-421 SS1]
GME10496_g	BU/EG/EL	1.07	0.33	0.67	0	ko05340//Primary immunodeficiency;ko01100//Metabolic pathways;ko03410//Base excision repair;ko00970//Aminoacyl-tRNA biosynthesis;ko00450//Selenocompound metabolism;ko01110//Biosynthesis of secondary metabolites;ko00130//Ubiquinone and other terpenoid-quinone biosynthesis	-	GO:0016799//hydrolase activity, hydrolyzing N-glycosyl compounds	GO:0006281//DNA repair	gi|336370748|gb|EGN99088.1|/1.42026e-116/hypothetical protein SERLA73DRAFT_181897 [Serpula lacrymans var. lacrymans S7.3]
GME2759_g	BU/EG/EL	0.71	1.67	0.33	0	-	-	-	-	gi|170111378|ref|XP_001886893.1|/0/predicted protein [Laccaria bicolor S238N-H82]
GME9151_g	BU/EG/EL	10.87	3.85	1.51	0	ko04142//Lysosome	-	GO:0008233//peptidase activity	-	gi|392568202|gb|EIW61376.1|/0/tripeptidyl peptidase A [Trametes versicolor FP-101664 SS1]
GME2213_g	BU/EG/EL	0.89	0.5	1.51	0	-	-	-	-	gi|170092034|ref|XP_001877239.1|/4.78608e-15/predicted protein [Laccaria bicolor S238N-H82]
GME431_g	BU/EG/EL	2.49	5.52	2.18	0	-	-	-	-	gi|390597892|gb|EIN07291.1|/1.179e-84/Cupredoxin [Punctularia strigosozonata HHB-11173 SS5]
GME3983_g	BU/EG/EL	0.71	0.67	0.33	0	-	-	-	-	gi|392586372|gb|EIW75709.1|/5.71229e-42/hypothetical protein CONPUDRAFT_112253 [Coniophora puteana RWD-64-598 SS2]
GME6156_g	BU/EG/EL	4.1	3.18	1	0	ko03010//Ribosome	GO:0030529//ribonucleoprotein complex	GO:0005198//structural molecule activity	GO:0010467//gene expression	gi|403415287|emb|CCM01987.1|/1.55912e-60/predicted protein [Fibroporia radiculosa]
GME6551_g	BU/EG/EL	1.07	1.17	0.33	0	-	-	-	-	gi|170113984|ref|XP_001888190.1|/4.9283e-64/predicted protein [Laccaria bicolor S238N-H82]
GME7485_g	BU/EG/EL	0.71	0.67	2.85	0	-	-	-	-	gi|170109001|ref|XP_001885708.1|/3.96856e-131/tetraspanin Tsp2 family [Laccaria bicolor S238N-H82]
GME8537_g	BU/EG/EL	1.25	1.34	0.67	0	-	-	-	-	gi|392568758|gb|EIW61932.1|/5.79429e-107/hypothetical protein TRAVEDRAFT_70168 [Trametes versicolor FP-101664 SS1]
GME11715_g	BU/EG/EL	0.36	0.33	0.67	0	ko05016//Huntington's disease;ko01100//Metabolic pathways;ko00190//Oxidative phosphorylation;ko05010//Alzheimer's disease;ko05012//Parkinson's disease	GO:0030529//ribonucleoprotein complex	-	-	gi|170084173|ref|XP_001873310.1|/3.279e-59/predicted protein [Laccaria bicolor S238N-H82]
GME239_g	BU/EG/EL	1.25	1.34	1.17	0	ko03013//RNA transport	-	-	-	gi|170087746|ref|XP_001875096.1|/4.32351e-104/predicted protein [Laccaria bicolor S238N-H82]
GME7716_g	BU/EG/EL	1.25	2.34	0.84	0	-	-	-	-	-
GME1910_g	BU/EG/EL	0.36	1.67	0.84	0	-	-	-	-	gi|170096927|ref|XP_001879683.1|/2.88086e-177/glycoside hydrolase family 71 protein [Laccaria bicolor S238N-H82]
GME7769_g	BU/EG/EL	0.71	0.33	0.5	0	ko04727//GABAergic synapse;ko04140//Regulation of autophagy	-	-	-	gi|389749287|gb|EIM90464.1|/2.98821e-68/autophagy-like protein 8 precursor [Stereum hirsutum FP-91666 SS1]
GME8459_g	BU/EG/EL	0.71	3.01	0.67	0	ko00900//Terpenoid backbone biosynthesis	GO:0044464//cell part	GO:0008168//methyltransferase activity	GO:0044238//primary metabolic process;GO:0044260	gi|170091040|ref|XP_001876742.1|/1.47803e-71/predicted protein [Laccaria bicolor S238N-H82]
GME8978_g	BU/EG/EL	0.71	0.33	0.5	0	ko00100//Steroid biosynthesis;ko01100//Metabolic pathways	-	-	-	gi|395323818|gb|EJF56274.1|/6.03995e-58/NAD(P)-binding protein, partial [Dichomitus squalens LYAD-421 SS1]
GME1762_g	BU/EG/EL	0.36	0.67	1	0	ko00230//Purine metabolism;ko04113//Meiosis - yeast	-	-	-	gi|336382548|gb|EGO23698.1|/0/hypothetical protein SERLADRAFT_450025 [Serpula lacrymans var. lacrymans S7.9]
GME6040_g	BU/EG/EL	0.71	1.17	1	0	ko00624//Polycyclic aromatic hydrocarbon degradation;ko01100//Metabolic pathways;ko00627//Aminobenzoate degradation;ko00363//Bisphenol degradation;ko01110//Biosynthesis of secondary metabolites;ko00903//Limonene and pinene degradation;ko00945//Stilbenoid, diarylheptanoid and gingerol biosynthesis;ko01120//Microbial metabolism in diverse environments;ko01100//Metabolic pathways;ko00360//Phenylalan…	-	GO:0046872//metal ion binding	-	gi|170103023|ref|XP_001882727.1|/1.32716e-147/predicted protein [Laccaria bicolor S238N-H82]
GME8424_g	BU/EG/EL	0.53	0.84	0.84	0	ko04011//MAPK signaling pathway - yeast	GO:0044464//cell part	GO:0005088//Ras guanyl-nucleotide exchange factor activity	GO:0007266//Rho protein signal transduction	gi|170090712|ref|XP_001876578.1|/0/predicted protein [Laccaria bicolor S238N-H82]
GME10708_g	BU/EG/EL	3.92	1.34	1.51	0	ko01100//Metabolic pathways;ko00280//Valine, leucine and isoleucine degradation;ko01110//Biosynthesis of secondary metabolites	-	GO:0003824//catalytic activity	GO:0008152//metabolic process	gi|392564189|gb|EIW57367.1|/1.06753e-63/NAD-P-binding protein [Trametes versicolor FP-101664 SS1]
GME5122_g	BU/EG/EL	1.78	2.51	0.67	0	-	-	-	-	gi|170095930|ref|XP_001879185.1|/5.97789e-11/predicted protein [Laccaria bicolor S238N-H82]
GME9389_g	BU/EG/EL	0.36	0.33	0.33	0	-	-	-	-	-
GME6781_g	BU/EG/EL	0.36	0.33	0.33	0	-	-	-	-	gi|392591368|gb|EIW80696.1|/1.93379e-17/hypothetical protein CONPUDRAFT_125520 [Coniophora puteana RWD-64-598 SS2]
GME6482_g	BU/EG/EL	1.43	0.67	0.84	0	ko00624//Polycyclic aromatic hydrocarbon degradation;ko01100//Metabolic pathways;ko00627//Aminobenzoate degradation;ko00363//Bisphenol degradation;ko01110//Biosynthesis of secondary metabolites;ko00903//Limonene and pinene degradation;ko00945//Stilbenoid, diarylheptanoid and gingerol biosynthesis;ko01120//Microbial metabolism in diverse environments;ko01100//Metabolic pathways;ko00360//Phenylalan…	-	-	-	gi|170103023|ref|XP_001882727.1|/7.68138e-133/predicted protein [Laccaria bicolor S238N-H82]
GME3080_g	BU/EG/EL	1.43	1	0.67	0	ko04141//Protein processing in endoplasmic reticulum	-	-	-	gi|170116674|ref|XP_001889527.1|/2.81618e-88/predicted protein [Laccaria bicolor S238N-H82]
GME1747_g	BU/EG/EL	0.89	1.34	0.84	0	ko01100//Metabolic pathways;ko00520//Amino sugar and nucleotide sugar metabolism;ko00500//Starch and sucrose metabolism;ko01110//Biosynthesis of secondary metabolites	-	GO:0003824//catalytic activity	-	gi|299742917|ref|XP_001835420.2|/2.16346e-85/cellulose-growth-specific protein [Coprinopsis cinerea okayama7#130]
GME2777_g	BU/EG/EL	1.43	2.17	0.5	0	ko02020//Two-component system;ko01100//Metabolic pathways;ko00591//Linoleic acid metabolism;ko00051//Fructose and mannose metabolism;ko00362//Benzoate degradation;ko00363//Bisphenol degradation;ko01110//Biosynthesis of secondary metabolites;ko00903//Limonene and pinene degradation;ko00650//Butanoate metabolism;ko00626//Naphthalene degradation;ko00625//Chloroalkane and chloroalkene degradation;ko0…	-	-	-	gi|336370538|gb|EGN98878.1|/1.56312e-103/hypothetical protein SERLA73DRAFT_181580 [Serpula lacrymans var. lacrymans S7.3]
GME1980_g	BU/EG/EL	2.49	7.69	4.19	0	-	-	-	-	gi|299743718|ref|XP_001835936.2|/6.90699e-78/hypothetical protein CC1G_03024 [Coprinopsis cinerea okayama7#130]
GME8730_g	BU/EG/EL	0.36	0.33	0.5	0	ko05166//HTLV-I infection	-	-	-	gi|336373322|gb|EGO01660.1|/7.72343e-89/hypothetical protein SERLA73DRAFT_158888 [Serpula lacrymans var. lacrymans S7.3]
GME11789_g	BU/EG/EL	5.17	1.67	0.67	0	-	-	-	-	-
GME10967_g	BU/EG/EL	1.6	0.84	4.35	0	-	-	GO:0005488//binding	-	gi|170092415|ref|XP_001877429.1|/0/predicted protein [Laccaria bicolor S238N-H82]
GME7507_g	BU/EG/EL	0.89	0.67	0.33	0	ko04146//Peroxisome;ko01100//Metabolic pathways;ko00311//Penicillin and cephalosporin biosynthesis;ko00472//D-Arginine and D-ornithine metabolism;ko00330//Arginine and proline metabolism;ko00260//Glycine, serine and threonine metabolism	-	GO:0003824//catalytic activity	-	gi|389750252|gb|EIM91423.1|/1.58707e-108/FAD dependent oxidoreductase [Stereum hirsutum FP-91666 SS1]
GME3967_g	BU/EG/EL	0.53	1.51	0.33	0	ko00300//Lysine biosynthesis;ko01100//Metabolic pathways;ko00310//Lysine degradation;ko01110//Biosynthesis of secondary metabolites	-	-	-	gi|336379219|gb|EGO20375.1|/0/putative aminoadipate reductase [Serpula lacrymans var. lacrymans S7.9]
GME4202_g	BU/EG/EL	1.6	0.67	0.67	0	-	-	-	-	gi|299744944|ref|XP_001831370.2|/0/Sip1/TFIP11 interacting protein [Coprinopsis cinerea okayama7#130]
GME638_g	BU/EG/EL	0.53	1.84	0.5	0	-	-	-	-	-
GME9991_g	BU/EG/EL	1.78	5.35	2.51	0	-	-	-	-	gi|336383949|gb|EGO25097.1|/2.21043e-07/hypothetical protein SERLADRAFT_407608 [Serpula lacrymans var. lacrymans S7.9]
GME2977_g	BU/EG/EL	0.36	1.17	0.67	0	-	-	-	-	gi|392563291|gb|EIW56470.1|/0/hypothetical protein TRAVEDRAFT_73047 [Trametes versicolor FP-101664 SS1]
GME5014_g	BU/EG/EL	0.53	0.67	0.67	0	-	GO:0031224//intrinsic to membrane	-	GO:0051234//establishment of localization	gi|170096975|ref|XP_001879707.1|/3.19373e-144/mitochondrial tricarboxylate transporter [Laccaria bicolor S238N-H82]
GME332_g	BU/EG/EL	1.6	1.34	0.84	0	-	-	-	-	gi|392566679|gb|EIW59855.1|/1.02494e-122/WD40 repeat-like protein [Trametes versicolor FP-101664 SS1]
GME9473_g	BU/EG/EL	2.49	1.51	0.84	0	-	-	-	-	gi|322712274|gb|EFZ03847.1|/8.21083e-09/F-box domain containing protein [Metarhizium anisopliae ARSEF 23]
GME8309_g	BU/EG/EL	1.96	1.67	1.17	0	ko01100//Metabolic pathways;ko00350//Tyrosine metabolism;ko03022//Basal transcription factors;ko03420//Nucleotide excision repair	-	GO:0003824//catalytic activity	-	gi|169861808|ref|XP_001837538.1|/1.69792e-127/fumarylacetoacetate hydrolase [Coprinopsis cinerea okayama7#130]
GME4674_g	BU/EG/EL	0.89	0.5	0.33	0	-	-	-	-	gi|336375887|gb|EGO04222.1|/2.51854e-58/hypothetical protein SERLA73DRAFT_67932 [Serpula lacrymans var. lacrymans S7.3]
GME8122_g	BU/EG/EL	1.78	2.17	2.34	0	ko04113//Meiosis - yeast	GO:0031224//intrinsic to membrane	GO:0022857//transmembrane transporter activity	GO:0006810//transport	gi|393221649|gb|EJD07134.1|/8.4089e-149/sugar transporter [Fomitiporia mediterranea MF3/22]
GME4030_g	BU/EG/EL	1.78	0.5	0.67	0	-	-	-	-	gi|169848791|ref|XP_001831100.1|/1.25687e-07/hypothetical protein CC1G_03991 [Coprinopsis cinerea okayama7#130]
GME3559_g	BU/EG/EL	0.53	0.5	0.67	0	-	-	-	-	-
GME6064_g	BU/EG/EL	0.71	2.01	0.33	0	ko00624//Polycyclic aromatic hydrocarbon degradation;ko01100//Metabolic pathways;ko00627//Aminobenzoate degradation;ko00363//Bisphenol degradation;ko01110//Biosynthesis of secondary metabolites;ko00903//Limonene and pinene degradation;ko00945//Stilbenoid, diarylheptanoid and gingerol biosynthesis;ko01120//Microbial metabolism in diverse environments;ko01100//Metabolic pathways;ko00360//Phenylalan…	-	GO:0046872//metal ion binding	-	gi|327343273|dbj|BAK09389.1|/2.3634e-134/cytochrome P450 [Postia placenta]
GME10095_g	BU/EG/EL	1.25	2.68	0.33	0	-	-	-	-	gi|393214403|gb|EJC99896.1|/5.13817e-66/hypothetical protein FOMMEDRAFT_22912 [Fomitiporia mediterranea MF3/22]
GME5953_g	BU/EG/EL	5.17	17.06	3.68	0	-	-	-	-	gi|395329841|gb|EJF62226.1|/1.89146e-81/hypothetical protein DICSQDRAFT_58814 [Dichomitus squalens LYAD-421 SS1]
GME9488_g	BU/EG/EL	3.39	1.34	0.67	0	-	-	-	-	gi|170085743|ref|XP_001874095.1|/1.19053e-58/predicted protein [Laccaria bicolor S238N-H82]
GME9464_g	BU/EG/EL	0.36	0.33	0.33	0	-	-	-	-	gi|336373244|gb|EGO01582.1|/1.27496e-23/hypothetical protein SERLA73DRAFT_70757 [Serpula lacrymans var. lacrymans S7.3]
GME4215_g	BU/EG/EL	0.53	0.33	0.33	0	-	-	GO:0016787//hydrolase activity	GO:0019538//protein metabolic process	gi|302686282|ref|XP_003032821.1|/7.96029e-139/hypothetical protein SCHCODRAFT_234294 [Schizophyllum commune H4-8]
GME2261_g	BU/EG/EL	0.36	0.5	0.5	0	-	-	-	-	gi|170092058|ref|XP_001877251.1|/9.40719e-70/predicted protein [Laccaria bicolor S238N-H82]
GME8665_g	BU/EG/EL	1.07	0.5	0.33	0	-	-	GO:0003824//catalytic activity	-	gi|389746945|gb|EIM88124.1|/7.62277e-163/glycoside hydrolase family 105 protein [Stereum hirsutum FP-91666 SS1]
GME10956_g	BU/EG/EL	0.36	0.67	0.84	0	ko02010//ABC transporters;ko01100//Metabolic pathways;ko00983//Drug metabolism - other enzymes;ko00240//Pyrimidine metabolism	-	-	-	gi|299738647|ref|XP_001834696.2|/3.01602e-108/uridine phosphorylase [Coprinopsis cinerea okayama7#130]
GME7345_g	BU/EG/EL	0.36	1.51	0.33	0	-	-	-	-	gi|296413844|ref|XP_002836618.1|/2.74612e-124/hypothetical protein [Tuber melanosporum Mel28]
GME1944_g	BU/EG/EL	1.07	0.84	0.67	0	ko01100//Metabolic pathways;ko00311//Penicillin and cephalosporin biosynthesis;ko01110//Biosynthesis of secondary metabolites	-	-	-	gi|389744795|gb|EIM85977.1|/0/nonribosomal peptide synthetase 12 [Stereum hirsutum FP-91666 SS1]
GME9768_g	BU/EG/EL	0.36	1	0.67	0	-	-	-	-	gi|392571086|gb|EIW64258.1|/2.93566e-29/hypothetical protein TRAVEDRAFT_41678 [Trametes versicolor FP-101664 SS1]
GME4486_g	BU/EG/EL	0.36	0.67	0.5	0	-	-	-	-	gi|170117389|ref|XP_001889882.1|/7.23292e-07/predicted protein [Laccaria bicolor S238N-H82]
GME2399_g	BU/EG/EL	1.78	2.01	0.33	0	ko03013//RNA transport	-	-	-	gi|392562981|gb|EIW56161.1|/2.51982e-137/hypothetical protein TRAVEDRAFT_172114 [Trametes versicolor FP-101664 SS1]
GME6850_g	BU/EG/EL	1.07	0.33	0.84	0	-	-	-	-	gi|299749389|ref|XP_001838723.2|/1.20012e-76/pre-mRNA-splicing factor CWC26 [Coprinopsis cinerea okayama7#130]
GME3586_g	BU/EG/EL	0.53	2.68	0.33	0	-	-	-	-	gi|336381105|gb|EGO22257.1|/3.88031e-39/hypothetical protein SERLADRAFT_409825 [Serpula lacrymans var. lacrymans S7.9]
GME9449_g	BU/EG/EL	2.32	2.51	1.67	0	ko01100//Metabolic pathways;ko00230//Purine metabolism	-	GO:0000166//nucleotide binding;GO:0019206//nucleoside kinase activity	GO:0043101//purine-containing compound salvage;GO:0006796//phosphate-containing compound metabolic process	gi|170085955|ref|XP_001874201.1|/2.01441e-146/predicted protein [Laccaria bicolor S238N-H82]
GME593_g	BU/EG/EL	0.71	1.34	0.5	0	-	-	-	-	-
GME7175_g	BU/EG/EL	0.71	0.67	0.33	0	-	-	-	-	-
GME9976_g	BU/EG/EL	0.89	1.17	0.33	0	-	-	-	-	gi|242220757|ref|XP_002476140.1|/1.63884e-30/predicted protein [Postia placenta Mad-698-R]
GME1997_g	BU/EG/EL	0.71	0.33	2.34	0	-	-	-	-	gi|170089965|ref|XP_001876205.1|/2.82545e-94/predicted protein [Laccaria bicolor S238N-H82]
GME1388_g	BU/EG/EL	0.53	1.34	0.33	0	-	-	GO:0046872//metal ion binding	-	gi|170103124|ref|XP_001882777.1|/7.18576e-71/predicted protein [Laccaria bicolor S238N-H82]
GME1211_g	BU/EG/EL	8.02	5.52	0.67	0	-	-	-	-	gi|170098769|ref|XP_001880603.1|/1.26301e-147/predicted protein [Laccaria bicolor S238N-H82]
GME3699_g	BU/EG/EL	1.25	1.34	1.17	0	-	-	-	-	gi|389747548|gb|EIM88726.1|/2.20701e-34/hypothetical protein STEHIDRAFT_119566 [Stereum hirsutum FP-91666 SS1]
GME4288_g	BU/EG/EL	0.89	0.84	0.33	0	ko04111//Cell cycle - yeast	-	-	GO:0009987//cellular process	gi|336368222|gb|EGN96565.1|/0/hypothetical protein SERLA73DRAFT_111171 [Serpula lacrymans var. lacrymans S7.3]
GME3527_g	BU/EG/EL	0.53	0.33	0.67	0	-	-	-	-	gi|169868478|ref|XP_001840810.1|/1.2915e-53/hypothetical protein CC1G_03039 [Coprinopsis cinerea okayama7#130]
GME5272_g	BU/EG/EL	3.21	7.19	0.67	0	-	GO:0031224//intrinsic to membrane	GO:0005275//amine transmembrane transporter activity	GO:0006865//amino acid transport	gi|169852580|ref|XP_001832972.1|/0/general amino acid permease AGP2 [Coprinopsis cinerea okayama7#130]
GME11123_g	BU/EG/EL	0.36	0.33	0.33	0	-	-	-	-	-
GME8777_g	BU/EG/EL	4.81	3.01	0.5	0	-	-	-	-	gi|390600901|gb|EIN10295.1|/9.95646e-88/Six-hairpin glycosidase [Punctularia strigosozonata HHB-11173 SS5]
GME8262_g	BU/EG/EL	3.03	0.67	1.67	0	ko04146//Peroxisome	-	-	-	gi|299749531|ref|XP_001836174.2|/1.06682e-95/adenine nucleotide transporter [Coprinopsis cinerea okayama7#130]
GME5044_g	BU/EG/EL	1.43	1.34	4.52	0	-	-	-	-	gi|170086922|ref|XP_001874684.1|/4.72495e-22/predicted protein [Laccaria bicolor S238N-H82]
GME8330_g	BU/EG/EL	5.17	2.84	2.34	0	ko04910//Insulin signaling pathway;ko01100//Metabolic pathways;ko04070//Phosphatidylinositol signaling system;ko00562//Inositol phosphate metabolism	-	GO:0042578//phosphoric ester hydrolase activity	-	gi|170091670|ref|XP_001877057.1|/0/inositol polyphosphate phosphatase [Laccaria bicolor S238N-H82]
GME3182_g	BU/EG/EL	1.96	0.33	0.5	0	-	-	-	-	-
GME8650_g	BU/EG/EL	1.6	2.84	3.52	0	-	-	-	-	gi|170091080|ref|XP_001876762.1|/2.61118e-80/predicted protein [Laccaria bicolor S238N-H82]
GME8315_g	BU/EG/EL	1.43	1.84	0.67	0	-	-	-	-	gi|353236161|emb|CCA68161.1|/3.8501e-102/hypothetical protein PIIN_02027 [Piriformospora indica DSM 11827]
GME8870_g	BU/EG/EL	1.25	1.17	1.17	0	ko05130//Pathogenic Escherichia coli infection	-	GO:0005488//binding	-	gi|170091988|ref|XP_001877216.1|/7.92331e-74/predicted protein [Laccaria bicolor S238N-H82]
GME10865_g	BU/EG/EL	2.49	2.84	0.5	0	-	-	-	GO:0006810//transport	gi|336363685|gb|EGN92061.1|/1.20933e-165/hypothetical protein SERLA73DRAFT_191634 [Serpula lacrymans var. lacrymans S7.3]
GME5347_g	BU/EG/EL	1.25	2.34	0.33	0	ko03460//Fanconi anemia pathway	-	-	GO:0044260;GO:0010467//gene expression;GO:0044238//primary metabolic process	gi|336383993|gb|EGO25141.1|/3.30462e-135/hypothetical protein SERLADRAFT_436903 [Serpula lacrymans var. lacrymans S7.9]
GME10060_g	BU/EG/EL	0.89	2.84	1.84	0	-	-	-	-	gi|170092943|ref|XP_001877693.1|/0/predicted protein [Laccaria bicolor S238N-H82]
GME9071_g	BU/EG/EL	1.25	1.17	0.67	0	-	-	-	-	gi|395325040|gb|EJF57469.1|/4.5684e-36/hypothetical protein DICSQDRAFT_69381 [Dichomitus squalens LYAD-421 SS1]
GME1087_g	BU/EG/EL	0.71	1.34	0.67	0	ko01100//Metabolic pathways;ko00520//Amino sugar and nucleotide sugar metabolism;ko00500//Starch and sucrose metabolism;ko02020//Two-component system;ko01100//Metabolic pathways;ko00460//Cyanoamino acid metabolism;ko00940//Phenylpropanoid biosynthesis;ko00500//Starch and sucrose metabolism;ko02030//Bacterial chemotaxis;ko01110//Biosynthesis of secondary metabolites	-	GO:0016798//hydrolase activity, acting on glycosyl bonds	GO:0044238//primary metabolic process	gi|392569232|gb|EIW62406.1|/0/hypothetical protein TRAVEDRAFT_57362 [Trametes versicolor FP-101664 SS1]
GME10362_g	BU/EG/EL	0.53	1.67	0.5	0	-	-	-	-	gi|170107025|ref|XP_001884723.1|/2.33662e-40/predicted protein [Laccaria bicolor S238N-H82]
GME8_g	BU/EG/EL	4.28	28.44	1.34	0	-	-	-	-	gi|299746357|ref|XP_002911037.1|/3.3867e-83/D-lactaldehyde dehydrogenase [Coprinopsis cinerea okayama7#130]
GME8937_g	BU/EG/EL	1.43	4.68	0.33	0	-	-	-	-	gi|170092585|ref|XP_001877514.1|/2.99171e-58/predicted protein [Laccaria bicolor S238N-H82]
GME8412_g	BU/EG/EL	0.53	0.67	0.67	0	ko03040//Spliceosome;ko03018//RNA degradation	-	-	-	gi|169861670|ref|XP_001837469.1|/1.28006e-39/hypothetical protein CC1G_01381 [Coprinopsis cinerea okayama7#130]
GME7383_g	BU/EG/EL	1.25	3.85	1.17	0	ko03430//Mismatch repair;ko05213//Endometrial cancer;ko05200//Pathways in cancer;ko05210//Colorectal cancer;ko03460//Fanconi anemia pathway	-	GO:0005488//binding	-	gi|170097253|ref|XP_001879846.1|/0/predicted protein [Laccaria bicolor S238N-H82]
GME9142_g	BU/EG/EL	2.32	8.7	3.52	0	ko00300//Lysine biosynthesis;ko01100//Metabolic pathways;ko00310//Lysine degradation;ko01110//Biosynthesis of secondary metabolites	-	-	-	gi|336379219|gb|EGO20375.1|/0/putative aminoadipate reductase [Serpula lacrymans var. lacrymans S7.9]
GME10081_g	BU/EG/EL	1.43	3.68	0.33	0	-	-	-	-	gi|336371418|gb|EGN99757.1|/4.51508e-37/hypothetical protein SERLA73DRAFT_179947 [Serpula lacrymans var. lacrymans S7.3]
GME8347_g	BU/EG/EL	1.25	1.17	0.67	0	-	-	-	-	-
GME4026_g	BU/EG/EL	1.25	2.34	0.5	0	-	-	-	-	gi|374772639|gb|AEZ63363.1|/1.28964e-40/PR-1 protein [Moniliophthora perniciosa]
GME1925_g	BU/EG/EL	0.36	0.5	1.17	0	-	-	-	-	gi|336369999|gb|EGN98340.1|/1.6237e-62/hypothetical protein SERLA73DRAFT_161157 [Serpula lacrymans var. lacrymans S7.3]
GME6092_g	BU/EG/EL	0.89	0.33	0.33	0	-	-	-	-	gi|170097423|ref|XP_001879931.1|/1.18295e-07/predicted protein [Laccaria bicolor S238N-H82]
GME3010_g	BU/EG/EL	1.78	1.51	0.5	0	-	-	-	-	gi|170098652|ref|XP_001880545.1|/7.99202e-48/predicted protein [Laccaria bicolor S238N-H82]
GME3057_g	BU/EG/EL	1.6	4.18	0.84	0	ko00624//Polycyclic aromatic hydrocarbon degradation;ko01100//Metabolic pathways;ko00627//Aminobenzoate degradation;ko00363//Bisphenol degradation;ko01110//Biosynthesis of secondary metabolites;ko00903//Limonene and pinene degradation;ko00945//Stilbenoid, diarylheptanoid and gingerol biosynthesis;ko01120//Microbial metabolism in diverse environments;ko01100//Metabolic pathways;ko00360//Phenylalan…	-	-	-	gi|170111507|ref|XP_001886957.1|/7.74281e-88/predicted protein [Laccaria bicolor S238N-H82]
GME11432_g	BU/EG/EL	1.25	0.5	2.18	0	ko03440//Homologous recombination	-	-	-	gi|392571260|gb|EIW64432.1|/2.53442e-44/hypothetical protein TRAVEDRAFT_41847 [Trametes versicolor FP-101664 SS1]
GME11318_g	BU/EG/EL	3.03	1.84	0.33	0	-	-	-	-	gi|302681683|ref|XP_003030523.1|/1.14049e-155/hypothetical protein SCHCODRAFT_57407 [Schizophyllum commune H4-8]
GME879_g	BU/EG/EL	0.53	0.5	0.5	0	ko03022//Basal transcription factors;ko03420//Nucleotide excision repair	-	-	-	gi|336384114|gb|EGO25262.1|/0/hypothetical protein SERLADRAFT_465142 [Serpula lacrymans var. lacrymans S7.9]
GME538_g	BU/EG/EL	0.71	0.33	0.33	0	-	-	-	-	gi|170086446|ref|XP_001874446.1|/8.21232e-76/predicted protein [Laccaria bicolor S238N-H82]
GME2306_g	BU/EG/EL	2.67	2.68	0.84	0	ko00624//Polycyclic aromatic hydrocarbon degradation;ko01100//Metabolic pathways;ko00627//Aminobenzoate degradation;ko00363//Bisphenol degradation;ko01110//Biosynthesis of secondary metabolites;ko00903//Limonene and pinene degradation;ko00945//Stilbenoid, diarylheptanoid and gingerol biosynthesis;ko01120//Microbial metabolism in diverse environments;ko01100//Metabolic pathways;ko00360//Phenylalan…	-	-	-	gi|170103023|ref|XP_001882727.1|/9.5728e-92/predicted protein [Laccaria bicolor S238N-H82]
GME5320_g	BU/EG/EL	0.71	0.5	0.33	0	-	-	-	-	gi|302690400|ref|XP_003034879.1|/2.0686e-26/hypothetical protein SCHCODRAFT_255897 [Schizophyllum commune H4-8]
GME547_g	BU/EG/EL	0.89	1.34	0.5	0	-	-	-	-	gi|42416980|gb|AAO72981.2|/0/laccase 1 [Volvariella volvacea]
GME4061_g	BU/EG/EL	0.71	2.01	0.5	0	-	-	-	-	gi|169857448|ref|XP_001835372.1|/2.35012e-61/MPU1p [Coprinopsis cinerea okayama7#130]
GME8729_g	BU/EG/EL	0.71	0.84	1.67	0	-	-	-	-	gi|170086996|ref|XP_001874721.1|/2.53444e-49/predicted protein [Laccaria bicolor S238N-H82]
GME11735_g	BU/EG/EL	3.92	13.88	0.84	0	ko03015//mRNA surveillance pathway;ko03040//Spliceosome;ko05164//Influenza A;ko03013//RNA transport	-	GO:0032559;GO:0042623//ATPase activity, coupled	-	gi|392597062|gb|EIW86384.1|/0/P-loop containing nucleoside triphosphate hydrolase protein [Coniophora puteana RWD-64-598 SS2]
GME5848_g	BU/EG/EL	7.13	10.37	0.67	0	-	-	-	-	gi|389746301|gb|EIM87481.1|/4.15489e-47/hypothetical protein STEHIDRAFT_156445 [Stereum hirsutum FP-91666 SS1]
GME39_g	BU/EG/EL	1.25	1.34	0.33	0	-	-	-	-	gi|358396245|gb|EHK45626.1|/1.93282e-26/hypothetical protein TRIATDRAFT_171630, partial [Trichoderma atroviride IMI 206040]
GME11734_g	BU/EG/EL	1.25	3.68	2.34	0	-	-	GO:0004673//protein histidine kinase activity;GO:0004871//signal transducer activity;GO:0000166//nucleotide binding	GO:0006468//protein phosphorylation;GO:0007165//signal transduction	gi|403414603|emb|CCM01303.1|/0/predicted protein [Fibroporia radiculosa]
GME601_g	BU/EG/EL	2.49	3.01	0.5	0	ko01100//Metabolic pathways;ko00592//alpha-Linolenic acid metabolism;ko04141//Protein processing in endoplasmic reticulum	-	GO:0003824//catalytic activity	-	gi|392561428|gb|EIW54609.1|/3.66068e-148/FMN-linked oxidoreductase [Trametes versicolor FP-101664 SS1]
GME9060_g	BU/EG/EL	0.53	2.01	2.34	0	-	-	-	-	gi|170116966|ref|XP_001889672.1|/0/argonaute-like protein [Laccaria bicolor S238N-H82]
GME699_g	BU/EG/EL	1.78	2.01	1.51	0	ko03070//Bacterial secretion system;ko01100//Metabolic pathways;ko00250//Alanine, aspartate and glutamate metabolism;ko03060//Protein export;ko00240//Pyrimidine metabolism	-	GO:0032559	GO:0008152//metabolic process	gi|170098412|ref|XP_001880425.1|/0/carbamoyl-phosphate synthase [Laccaria bicolor S238N-H82]
GME7241_g	BU/EG/EL	0.89	0.67	1	0	-	-	-	-	gi|170102781|ref|XP_001882606.1|/1.55428e-124/predicted protein [Laccaria bicolor S238N-H82]
GME2335_g	BU/EG/EL	0.53	1.84	0.5	0	-	-	-	-	gi|299751133|ref|XP_001830079.2|/2.90449e-50/hypothetical protein CC1G_04512 [Coprinopsis cinerea okayama7#130]
GME1606_g	BU/EG/EL	0.53	5.02	0.33	0	-	-	-	-	gi|170100060|ref|XP_001881248.1|/3.96534e-104/predicted protein [Laccaria bicolor S238N-H82]
GME2026_g	BU/EG/EL	3.56	0.84	2.18	0	-	-	-	-	gi|336363775|gb|EGN92148.1|/2.29937e-98/hypothetical protein SERLA73DRAFT_191594 [Serpula lacrymans var. lacrymans S7.3]
GME4583_g	BU/EG/EL	0.71	0.5	0.67	0	-	-	-	-	gi|330906864|ref|XP_003295625.1|/1.32286e-12/hypothetical protein PTT_01977 [Pyrenophora teres f. teres 0-1]
GME7771_g	BU/EG/EL	0.53	0.5	0.84	0	ko04144//Endocytosis	-	-	-	gi|170094722|ref|XP_001878582.1|/6.31045e-116/predicted protein [Laccaria bicolor S238N-H82]
GME308_g	BU/EG/EL	10.87	0.67	1	0	ko00930//Caprolactam degradation;ko01120//Microbial metabolism in diverse environments	-	-	-	gi|169613494|ref|XP_001800164.1|/2.07877e-179/hypothetical protein SNOG_09878 [Phaeosphaeria nodorum SN15]
GME6736_g	BU/EG/EL	0.36	0.5	0.84	0	-	-	-	-	gi|302682137|ref|XP_003030750.1|/2.99863e-08/hypothetical protein SCHCODRAFT_110944 [Schizophyllum commune H4-8]
GME380_g	BU/EG/EL	1.07	1.34	0.67	0	-	-	-	-	gi|403419342|emb|CCM06042.1|/0/predicted protein [Fibroporia radiculosa]
GME2668_g	BU/EG/EL	3.21	3.18	0.5	0	-	-	-	-	gi|170107713|ref|XP_001885066.1|/7.71916e-54/predicted protein [Laccaria bicolor S238N-H82]
GME3487_g	BU/EG/EL	0.36	0.33	0.33	0	-	-	-	-	-
GME895_g	BU/EG/EL	1.78	0.5	1	0	ko03040//Spliceosome	-	GO:0046872//metal ion binding	-	gi|336371327|gb|EGN99666.1|/0/hypothetical protein SERLA73DRAFT_88231 [Serpula lacrymans var. lacrymans S7.3]
GME11824_g	BU/EG/EL	2.14	2.68	0.5	0	ko00983//Drug metabolism - other enzymes;ko01100//Metabolic pathways;ko00564//Glycerophospholipid metabolism;ko00561//Glycerolipid metabolism;ko00592//alpha-Linolenic acid metabolism	-	-	-	gi|402222346|gb|EJU02413.1|/2.63129e-109/carboxylesterase [Dacryopinax sp. DJM-731 SS1]
GME4893_g	BU/EG/EL	0.53	1	0.33	0	-	-	-	-	-
GME7733_g	BU/EG/EL	1.78	4.68	0.84	0	ko00562//Inositol phosphate metabolism	-	-	-	gi|403419093|emb|CCM05793.1|/1.14717e-101/predicted protein [Fibroporia radiculosa]
GME1514_g	BU/EG/EL	1.96	2.84	1.34	0	ko05168//Herpes simplex infection	-	-	-	gi|336375639|gb|EGO03975.1|/1.35909e-80/hypothetical protein SERLA73DRAFT_175685 [Serpula lacrymans var. lacrymans S7.3]
GME6545_g	BU/EG/EL	0.36	2.34	0.33	0	ko03018//RNA degradation;ko03018//RNA degradation	-	-	-	gi|299748471|ref|XP_001839156.2|/1.40055e-116/WD repeat-containing protein 61 [Coprinopsis cinerea okayama7#130]
GME10181_g	BU/EG/EL	1.25	1.84	1	0	ko01100//Metabolic pathways;ko00513//Various types of N-glycan biosynthesis;ko00510//N-Glycan biosynthesis	-	-	-	gi|170104013|ref|XP_001883221.1|/1.15407e-68/predicted protein [Laccaria bicolor S238N-H82]
GME10094_g	BU/EG/EL	2.67	5.85	3.18	0	-	GO:0016020//membrane	-	-	gi|189037928|sp|B0D0P0.2|PRM1_LACBS/0/RecName: Full=Plasma membrane fusion protein PRM1
GME4593_g	BU/EG/EL	8.37	3.18	0.67	0	-	-	-	-	gi|238592614|ref|XP_002392959.1|/2.56093e-09/hypothetical protein MPER_07397 [Moniliophthora perniciosa FA553]
GME9972_g	BU/EG/EL	1.43	2.34	1.34	0	ko01100//Metabolic pathways;ko04142//Lysosome;ko00062//Fatty acid elongation	-	GO:0016790//thiolester hydrolase activity	GO:0043412//macromolecule modification	gi|299751744|ref|XP_001830455.2|/8.96397e-122/palmitoyl-protein thioesterase [Coprinopsis cinerea okayama7#130]
GME823_g	BU/EG/EL	0.36	1.84	0.84	0	ko01100//Metabolic pathways;ko00624//Polycyclic aromatic hydrocarbon degradation;ko00340//Histidine metabolism;ko00623//Toluene degradation;ko00627//Aminobenzoate degradation;ko00361//Chlorocyclohexane and chlorobenzene degradation;ko00363//Bisphenol degradation;ko00960//Tropane, piperidine and pyridine alkaloid biosynthesis;ko00903//Limonene and pinene degradation;ko00626//Naphthalene degradatio…	-	GO:0004091//carboxylesterase activity	GO:0044238//primary metabolic process	gi|395331054|gb|EJF63436.1|/3.45194e-107/alpha/beta-hydrolase [Dichomitus squalens LYAD-421 SS1]
GME11326_g	BU/EG/EL	21.74	3.18	2.01	0	ko04621//NOD-like receptor signaling pathway;ko04626//Plant-pathogen interaction	-	-	-	gi|390604387|gb|EIN13778.1|/1.3499e-68/SGS-domain-containing protein [Punctularia strigosozonata HHB-11173 SS5]
GME9189_g	BU/EG/EL	4.99	8.03	0.33	0	ko00624//Polycyclic aromatic hydrocarbon degradation;ko01100//Metabolic pathways;ko00627//Aminobenzoate degradation;ko00363//Bisphenol degradation;ko01110//Biosynthesis of secondary metabolites;ko00903//Limonene and pinene degradation;ko00945//Stilbenoid, diarylheptanoid and gingerol biosynthesis;ko01120//Microbial metabolism in diverse environments;ko01100//Metabolic pathways;ko00360//Phenylalan…	-	GO:0016491//oxidoreductase activity;GO:0005506//iron ion binding	-	gi|170090418|ref|XP_001876431.1|/1.25733e-142/potential P450 cytochrome [Laccaria bicolor S238N-H82]
GME1075_g	BU/EG/EL	2.14	2.17	1.51	0	-	-	-	-	gi|395324606|gb|EJF57043.1|/2.54237e-55/hypothetical protein DICSQDRAFT_92799 [Dichomitus squalens LYAD-421 SS1]
GME4137_g	BU/EG/EL	1.25	0.67	2.85	0	-	-	-	-	gi|393244468|gb|EJD51980.1|/3.36758e-62/hypothetical protein AURDEDRAFT_181547 [Auricularia delicata TFB-10046 SS5]
GME7070_g	BU/EG/EL	2.14	1.34	0.67	0	-	-	-	-	gi|317155778|ref|XP_001825367.2|/1.6709e-35/NACHT and WD40 domain protein [Aspergillus oryzae RIB40]
GME10354_g	BU/EG/EL	0.36	2.34	0.33	0	ko05130//Pathogenic Escherichia coli infection;ko04745//Phototransduction - fly;ko05164//Influenza A;ko05412//Arrhythmogenic right ventricular cardiomyopathy (ARVC);ko04971//Gastric acid secretion;ko04810//Regulation of actin cytoskeleton;ko05414//Dilated cardiomyopathy;ko05416//Viral myocarditis;ko04670//Leukocyte transendothelial migration;ko05410//Hypertrophic cardiomyopathy (HCM);ko04510//Foc…	GO:0044424//intracellular part	GO:0000166//nucleotide binding	-	gi|57013327|gb|AAW32475.1|/7.63177e-92/gamma-actin [Blakeslea trispora]
GME10576_g	BU/EG/EL	0.53	0.5	1	0	-	-	-	-	-
GME1662_g	BU/EG/EL	0.53	1.67	0.33	0	-	-	-	-	gi|336368413|gb|EGN96756.1|/2.4309e-20/hypothetical protein SERLA73DRAFT_161770 [Serpula lacrymans var. lacrymans S7.3]
GME3194_g	BU/EG/EL	1.07	0.5	0.33	0	-	-	-	-	gi|170096740|ref|XP_001879590.1|/5.02881e-78/predicted protein [Laccaria bicolor S238N-H82]
GME7470_g	BU/EG/EL	1.96	3.01	0.33	0	ko04910//Insulin signaling pathway;ko03010//Ribosome;ko04150//mTOR signaling pathway	GO:0030529//ribonucleoprotein complex	GO:0005198//structural molecule activity	GO:0010467//gene expression	gi|170109059|ref|XP_001885737.1|/2.10155e-97/40S ribosomal protein S6 [Laccaria bicolor S238N-H82]
GME6358_g	BU/EG/EL	19.96	3.35	0.33	0	ko04110//Cell cycle;ko04111//Cell cycle - yeast;ko04113//Meiosis - yeast	-	GO:0005488//binding	-	gi|170087342|ref|XP_001874894.1|/0/predicted protein [Laccaria bicolor S238N-H82]
GME8370_g	BU/EG/EL	0.36	1.67	1	0	ko00190//Oxidative phosphorylation;ko05016//Huntington's disease;ko01100//Metabolic pathways;ko00190//Oxidative phosphorylation;ko05010//Alzheimer's disease;ko05012//Parkinson's disease	-	-	-	gi|336373686|gb|EGO02024.1|/3.08733e-41/B16.6 subunit of GRIM-19, NADH:ubiquinone oxidoreductase [Serpula lacrymans var. lacrymans S7.3]
GME9932_g	BU/EG/EL	0.71	0.5	1	0	-	-	-	-	gi|403411983|emb|CCL98683.1|/0/predicted protein [Fibroporia radiculosa]
GME10490_g	BU/EG/EL	11.94	6.86	1.34	0	-	-	-	-	gi|380876873|sp|A8NU13.1|COP4_COPC7/4.82988e-104/RecName: Full=Linoleate 10R-lipoxygenase COP4; AltName: Full=Sesquiterpene synthase COP4
GME4213_g	BU/EG/EL	0.89	3.18	7.03	0	ko00720//Carbon fixation pathways in prokaryotes;ko01100//Metabolic pathways;ko00670//One carbon pool by folate;ko01120//Microbial metabolism in diverse environments;ko00680//Methane metabolism	-	GO:0016646//oxidoreductase activity, acting on the CH-NH group of donors, NAD or NADP as acceptor	GO:0000096//sulfur amino acid metabolic process	gi|170087860|ref|XP_001875153.1|/0/predicted protein [Laccaria bicolor S238N-H82]
GME7505_g	BU/EG/EL	0.53	1.67	0.67	0	ko01100//Metabolic pathways;ko00790//Folate biosynthesis	-	-	-	gi|336370095|gb|EGN98436.1|/6.6029e-105/hypothetical protein SERLA73DRAFT_183442 [Serpula lacrymans var. lacrymans S7.3]
GME7172_g	BU/EG/EL	0.53	0.84	0.33	0	-	-	-	-	gi|170097207|ref|XP_001879823.1|/5.47804e-69/predicted protein [Laccaria bicolor S238N-H82]
GME6929_g	BU/EG/EL	0.53	1.67	0.33	0	-	-	-	-	gi|389744321|gb|EIM85504.1|/4.82039e-17/hypothetical protein STEHIDRAFT_169410, partial [Stereum hirsutum FP-91666 SS1]
GME233_g	BU/EG/EL	1.25	3.01	0.67	0	-	GO:0030529//ribonucleoprotein complex	GO:0005198//structural molecule activity;GO:0005488//binding	GO:0010467//gene expression	gi|242216630|ref|XP_002474121.1|/8.80141e-68/mitochondrial ribosomal protein L23 [Postia placenta Mad-698-R]
GME11416_g	BU/EG/EL	1.25	1.67	0.84	0	-	-	-	-	gi|170084023|ref|XP_001873235.1|/4.30043e-98/predicted protein [Laccaria bicolor S238N-H82]
GME4787_g	BU/EG/EL	2.32	0.5	1	0	-	-	-	-	gi|169851180|ref|XP_001832281.1|/7.7981e-11/hypothetical protein CC1G_02543 [Coprinopsis cinerea okayama7#130]
GME9732_g	BU/EG/EL	0.53	0.33	0.5	0	-	-	-	-	gi|336376510|gb|EGO04845.1|/1.22983e-51/hypothetical protein SERLA73DRAFT_118646 [Serpula lacrymans var. lacrymans S7.3]
GME4888_g	BU/EG/EL	0.53	0.67	1.34	0	ko03410//Base excision repair	-	GO:0003824//catalytic activity	-	gi|170102771|ref|XP_001882601.1|/6.80434e-128/predicted protein [Laccaria bicolor S238N-H82]
GME11800_g	BU/EG/EL	0.36	1.17	0.33	0	-	-	GO:0004672//protein kinase activity;GO:0032559	GO:0006464//cellular protein modification process	gi|336367435|gb|EGN95780.1|/0/hypothetical protein SERLA73DRAFT_76842 [Serpula lacrymans var. lacrymans S7.3]
GME9879_g	BU/EG/EL	1.25	0.5	0.5	0	-	-	-	-	gi|170105932|ref|XP_001884178.1|/1.59425e-13/ectomycorrhiza-regulated small secreted protein [Laccaria bicolor S238N-H82]
GME4977_g	BU/EG/EL	0.89	1	0.33	0	-	-	GO:0016301//kinase activity;GO:0000166//nucleotide binding	-	gi|299741031|ref|XP_002910397.1|/4.70887e-112/STE/STE20/PAKA protein kinase [Coprinopsis cinerea okayama7#130]
GME1117_g	BU/EG/EL	0.89	3.01	1.67	0	-	-	GO:0005488//binding	-	gi|336373142|gb|EGO01480.1|/2.14032e-77/hypothetical protein SERLA73DRAFT_103282 [Serpula lacrymans var. lacrymans S7.3]
GME9558_g	BU/EG/EL	1.07	0.67	0.67	0	-	-	-	GO:0006810//transport	gi|170097373|ref|XP_001879906.1|/7.37456e-130/CDF-like metal transporter [Laccaria bicolor S238N-H82]
GME1032_g	BU/EG/EL	1.43	4.68	1	0	-	-	-	-	gi|395332354|gb|EJF64733.1|/4.67616e-169/oxalate decarboxylase [Dichomitus squalens LYAD-421 SS1]
GME7165_g	BU/EG/EL	0.71	0.33	0.67	0	-	-	-	-	-
GME7741_g	BU/EG/EL	1.43	4.01	0.33	0	-	-	-	-	-
GME7846_g	BU/EG/EL	0.89	0.5	0.5	0	-	-	-	-	gi|390598032|gb|EIN07431.1|/7.10563e-22/hypothetical protein PUNSTDRAFT_121543 [Punctularia strigosozonata HHB-11173 SS5]
GME11845_g	BU/EG/EL	1.96	1.67	0.84	0	-	-	-	-	gi|170107159|ref|XP_001884790.1|/6.75845e-11/predicted protein [Laccaria bicolor S238N-H82]
GME11455_g	BU/EG/EL	1.43	4.68	0.5	0	-	-	-	-	gi|170084055|ref|XP_001873251.1|/8.19722e-67/predicted protein [Laccaria bicolor S238N-H82]
GME7494_g	BU/EG/EL	13.19	12.21	0.67	0	-	-	-	-	gi|336371787|gb|EGO00127.1|/0/hypothetical protein SERLA73DRAFT_107112 [Serpula lacrymans var. lacrymans S7.3]
GME8827_g	BU/EG/EL	0.71	0.33	0.33	0	-	-	-	-	gi|170091996|ref|XP_001877220.1|/1.91383e-64/predicted protein [Laccaria bicolor S238N-H82]
GME2925_g	BU/EG/EL	2.32	3.68	2.18	0	-	GO:0043231//intracellular membrane-bounded organelle	GO:0003677//DNA binding;GO:0001071//nucleic acid binding transcription factor activity	GO:0006351//transcription, DNA-dependent	gi|170111388|ref|XP_001886898.1|/4.92824e-27/predicted protein [Laccaria bicolor S238N-H82]
GME4384_g	BU/EG/EL	0.36	0.5	0.67	0	ko03050//Proteasome;ko05169//Epstein-Barr virus infection	-	-	-	gi|403415748|emb|CCM02448.1|/1.14906e-149/predicted protein [Fibroporia radiculosa]
GME6735_g	BU/EG/EL	1.07	0.5	1	0	-	-	-	-	gi|170087070|ref|XP_001874758.1|/1.76557e-31/predicted protein [Laccaria bicolor S238N-H82]
GME7891_g	BU/EG/EL	8.2	2.34	3.01	0	-	-	-	-	gi|170088536|ref|XP_001875491.1|/0/predicted protein [Laccaria bicolor S238N-H82]
GME3405_g	BU/EG/EL	0.53	1.17	2.85	0	-	-	-	-	gi|336388181|gb|EGO29325.1|/1.17305e-48/hypothetical protein SERLADRAFT_412873 [Serpula lacrymans var. lacrymans S7.9]
GME7887_g	BU/EG/EL	0.36	1	0.33	0	-	-	-	-	gi|302692454|ref|XP_003035906.1|/0/hypothetical protein SCHCODRAFT_105474 [Schizophyllum commune H4-8]
GME8400_g	BU/EG/EL	1.96	0.5	0.33	0	ko03013//RNA transport	-	-	-	gi|170090740|ref|XP_001876592.1|/2.23256e-82/predicted protein [Laccaria bicolor S238N-H82]
GME1372_g	BU/EG/EL	2.32	0.84	1	0	-	-	-	-	gi|170109865|ref|XP_001886139.1|/1.23617e-54/predicted protein [Laccaria bicolor S238N-H82]
GME10038_g	BU/EG/EL	0.89	0.84	0.33	0	-	-	-	-	gi|299751863|ref|XP_001830543.2|/2.74407e-104/hypothetical protein CC1G_11551 [Coprinopsis cinerea okayama7#130]
GME8292_g	BU/EG/EL	1.43	1	0.67	0	-	-	GO:0016741	GO:0006730//one-carbon metabolic process	gi|170091558|ref|XP_001877001.1|/2.26784e-125/predicted protein [Laccaria bicolor S238N-H82]
GME11566_g	BU/EG/EL	1.25	0.84	1.17	0	ko05016//Huntington's disease;ko01100//Metabolic pathways;ko00190//Oxidative phosphorylation;ko05010//Alzheimer's disease;ko05012//Parkinson's disease	-	GO:0050136//NADH dehydrogenase (quinone) activity	GO:0006091//generation of precursor metabolites and energy	gi|299755128|ref|XP_001828448.2|/9.20396e-114/NADH-ubiquinone oxidoreductase kDa subunit [Coprinopsis cinerea okayama7#130]
GME8279_g	BU/EG/EL	0.36	0.5	0.67	0	-	GO:0044464//cell part	-	-	gi|336373776|gb|EGO02114.1|/1.98946e-124/hypothetical protein SERLA73DRAFT_159161 [Serpula lacrymans var. lacrymans S7.3]
GME9563_g	BU/EG/EL	0.53	0.67	0.33	0	-	-	GO:0016787//hydrolase activity	-	gi|242207391|ref|XP_002469549.1|/7.79766e-92/predicted protein [Postia placenta Mad-698-R]
GME7001_g	BU/EG/EL	2.85	2.17	1.34	0	-	-	-	-	gi|390594610|gb|EIN04020.1|/1.09505e-147/DUF1479-domain-containing protein [Punctularia strigosozonata HHB-11173 SS5]
GME4289_g	BU/EG/EL	1.25	3.85	0.5	0	-	-	-	-	gi|170104890|ref|XP_001883658.1|/1.75516e-20/predicted protein [Laccaria bicolor S238N-H82]
GME6220_g	BU/EG/EL	0.71	0.84	0.33	0	-	-	-	-	gi|170095605|ref|XP_001879023.1|/1.57542e-41/predicted protein [Laccaria bicolor S238N-H82]
GME11554_g	BU/EG/EL	4.81	3.01	3.52	0	-	-	GO:0017111//nucleoside-triphosphatase activity;GO:0000166//nucleotide binding	-	gi|302697571|ref|XP_003038464.1|/0/hypothetical protein SCHCODRAFT_46575 [Schizophyllum commune H4-8]
GME5033_g	BU/EG/EL	0.36	0.84	0.84	0	ko04910//Insulin signaling pathway;ko04150//mTOR signaling pathway	GO:0044424//intracellular part	GO:0017111//nucleoside-triphosphatase activity;GO:0032561//guanyl ribonucleotide binding	GO:0035556//intracellular signal transduction;GO:0009207	gi|170097165|ref|XP_001879802.1|/2.50402e-85/predicted protein [Laccaria bicolor S238N-H82]
GME6507_g	BU/EG/EL	2.14	1.51	0.67	0	ko04142//Lysosome	GO:0030120//vesicle coat	-	GO:0015031//protein transport	gi|170107540|ref|XP_001884980.1|/0/coatomer protein [Laccaria bicolor S238N-H82]
GME3363_g	BU/EG/EL	0.71	0.67	0.67	0	-	-	-	-	gi|242214259|ref|XP_002472953.1|/9.88437e-09/predicted protein [Postia placenta Mad-698-R]
GME10327_g	BU/EG/EL	3.21	1.67	2.18	0	-	-	-	-	gi|299741226|ref|XP_001834312.2|/1.46403e-07/hypothetical protein CC1G_11721 [Coprinopsis cinerea okayama7#130]
GME1295_g	BU/EG/EL	1.25	1.51	0.33	0	-	-	-	-	gi|390598918|gb|EIN08315.1|/4.72824e-06/hypothetical protein PUNSTDRAFT_134707 [Punctularia strigosozonata HHB-11173 SS5]
GME1011_g	BU/EG/EL	0.89	1.51	0.5	0	-	-	GO:0016772//transferase activity, transferring phosphorus-containing groups	-	gi|170092989|ref|XP_001877716.1|/0/predicted protein [Laccaria bicolor S238N-H82]
GME11474_g	BU/EG/EL	0.53	0.67	0.84	0	ko04144//Endocytosis	-	-	-	gi|390604112|gb|EIN13503.1|/0/hypothetical protein PUNSTDRAFT_140028 [Punctularia strigosozonata HHB-11173 SS5]
GME5267_g	BU/EG/EL	1.96	1.17	1.17	0	-	-	-	-	gi|299753212|ref|XP_002911846.1|/0/calcium:hydrogen antiporter [Coprinopsis cinerea okayama7#130]
GME10536_g	BU/EG/EL	0.36	0.84	1.67	0	-	-	-	-	gi|170098917|ref|XP_001880677.1|/5.80514e-115/predicted protein [Laccaria bicolor S238N-H82]
GME3433_g	BU/EG/EL	0.36	0.33	0.33	0	-	-	-	-	gi|170108188|ref|XP_001885303.1|/1.04694e-06/predicted protein [Laccaria bicolor S238N-H82]
GME7347_g	BU/EG/EL	0.89	5.19	2.51	0	-	-	-	-	gi|170112350|ref|XP_001887377.1|/1.07261e-64/predicted protein [Laccaria bicolor S238N-H82]
GME11903_g	BU/EG/EL	0.36	1.34	0.33	0	ko03430//Mismatch repair;ko00970//Aminoacyl-tRNA biosynthesis	-	-	-	gi|395331241|gb|EJF63622.1|/9.41658e-180/protein kinase subdomain-containing protein PKL/CAK/Fmp29 [Dichomitus squalens LYAD-421 SS1]
GME4410_g	BU/EG/EL	0.71	0.33	0.5	0	-	-	-	-	gi|299747368|ref|XP_001836992.2|/1.24391e-48/metalloprotease [Coprinopsis cinerea okayama7#130]
GME8162_g	BU/EG/EL	0.53	0.33	0.67	0	-	-	-	-	gi|170099411|ref|XP_001880924.1|/0/predicted protein [Laccaria bicolor S238N-H82]
GME1010_g	BU/EG/EL	1.6	1.51	0.84	0	-	-	GO:0005488//binding	-	gi|336371953|gb|EGO00293.1|/8.75595e-163/hypothetical protein SERLA73DRAFT_180800 [Serpula lacrymans var. lacrymans S7.3]
GME6909_g	BU/EG/EL	1.25	1	1.67	0	ko04011//MAPK signaling pathway - yeast;ko04113//Meiosis - yeast	-	GO:0000166//nucleotide binding	-	gi|170096486|ref|XP_001879463.1|/3.32981e-173/guanine nucleotide-binding protein [Laccaria bicolor S238N-H82]
GME816_g	BU/EG/EL	0.71	2.17	0.33	0	-	-	-	-	gi|170097860|ref|XP_001880149.1|/7.94436e-116/predicted protein [Laccaria bicolor S238N-H82]
GME4086_g	BU/EG/EL	0.36	3.18	2.01	0	-	-	-	-	gi|302698141|ref|XP_003038749.1|/3.45685e-39/hypothetical protein SCHCODRAFT_64720 [Schizophyllum commune H4-8]
GME11420_g	BU/EG/EL	3.92	2.17	0.84	0	ko00624//Polycyclic aromatic hydrocarbon degradation;ko01100//Metabolic pathways;ko00627//Aminobenzoate degradation;ko00363//Bisphenol degradation;ko01110//Biosynthesis of secondary metabolites;ko00903//Limonene and pinene degradation;ko00945//Stilbenoid, diarylheptanoid and gingerol biosynthesis;ko01120//Microbial metabolism in diverse environments;ko01100//Metabolic pathways;ko00360//Phenylalan…	-	GO:0046872//metal ion binding	-	gi|327343295|dbj|BAK09400.1|/6.75805e-133/cytochrome P450 [Postia placenta]
GME8669_g	BU/EG/EL	0.89	1.17	0.67	0	-	-	GO:0046914//transition metal ion binding;GO:0051540	GO:0031163	gi|169861448|ref|XP_001837358.1|/2.26804e-74/iron sulfur cluster assembly protein 1 [Coprinopsis cinerea okayama7#130]
GME8638_g	BU/EG/EL	2.67	8.87	0.67	0	ko01100//Metabolic pathways;ko00230//Purine metabolism;ko04115//p53 signaling pathway;ko00480//Glutathione metabolism;ko00240//Pyrimidine metabolism	-	GO:0046872//metal ion binding;GO:0016728	GO:0009132//nucleoside diphosphate metabolic process	gi|169860861|ref|XP_001837065.1|/8.65317e-179/ribonucleotide reductase small subunit [Coprinopsis cinerea okayama7#130]
GME7232_g	BU/EG/EL	0.71	0.84	0.84	0	-	-	-	-	-
GME1973_g	BU/EG/EL	1.96	2.51	1.51	0	-	-	-	-	gi|336369892|gb|EGN98233.1|/2.13971e-45/hypothetical protein SERLA73DRAFT_74462 [Serpula lacrymans var. lacrymans S7.3]
GME6349_g	BU/EG/EL	0.53	2.51	0.67	0	-	-	-	-	gi|392563043|gb|EIW56223.1|/2.34417e-10/hypothetical protein TRAVEDRAFT_50705 [Trametes versicolor FP-101664 SS1]
GME2410_g	BU/EG/EL	0.53	0.33	0.33	0	-	-	-	-	gi|403413136|emb|CCL99836.1|/6.24298e-06/predicted protein [Fibroporia radiculosa]
GME11360_g	BU/EG/EL	0.36	1.17	0.33	0	-	-	-	-	gi|170085163|ref|XP_001873805.1|/5.69745e-71/predicted protein [Laccaria bicolor S238N-H82]
GME8472_g	BU/EG/EL	5.17	1.84	1	0	-	-	-	-	gi|299747770|ref|XP_001837247.2|/4.10513e-71/hypothetical protein CC1G_00383 [Coprinopsis cinerea okayama7#130]
GME5252_g	BU/EG/EL	1.25	2.51	1.34	0	ko03015//mRNA surveillance pathway;ko03013//RNA transport	GO:0044424//intracellular part	GO:0046914//transition metal ion binding;GO:0003676//nucleic acid binding;GO:0017111//nucleoside-triphosphatase activity;GO:0032559	GO:0000956//nuclear-transcribed mRNA catabolic process	gi|169852646|ref|XP_001833005.1|/0/ATP dependent helicase [Coprinopsis cinerea okayama7#130]
GME3359_g	BU/EG/EL	0.53	0.33	0.33	0	-	-	-	-	-
GME9737_g	BU/EG/EL	1.6	3.18	0.33	0	-	-	-	-	gi|403412376|emb|CCL99076.1|/4.61326e-39/predicted protein [Fibroporia radiculosa]
GME6770_g	BU/EG/EL	0.89	2.51	0.84	0	ko05200//Pathways in cancer;ko05212//Pancreatic cancer	GO:0044464//cell part	GO:0008047//enzyme activator activity;GO:0030695//GTPase regulator activity	GO:0035556//intracellular signal transduction	gi|299750760|ref|XP_001829805.2|/0/rho GTPase activating protein 22 [Coprinopsis cinerea okayama7#130]
GME6945_g	BU/EG/EL	1.07	1.17	1.17	0	-	-	-	-	gi|170115003|ref|XP_001888697.1|/4.88637e-130/predicted protein [Laccaria bicolor S238N-H82]
GME1209_g	BU/EG/EL	0.89	0.67	0.33	0	-	-	-	-	gi|389746533|gb|EIM87713.1|/2.98822e-21/hypothetical protein STEHIDRAFT_121331 [Stereum hirsutum FP-91666 SS1]
GME5746_g	BU/EG/EL	1.6	0.84	1.17	0	ko03460//Fanconi anemia pathway	-	-	-	gi|336373344|gb|EGO01682.1|/1.49115e-48/hypothetical protein SERLA73DRAFT_70852 [Serpula lacrymans var. lacrymans S7.3]
GME2710_g	BU/EG/EL	2.67	1.67	0.33	0	-	-	-	-	gi|170093293|ref|XP_001877868.1|/2.71035e-06/predicted protein [Laccaria bicolor S238N-H82]
GME8540_g	BU/EG/EL	0.36	0.5	0.33	0	-	-	-	-	gi|392586779|gb|EIW76114.1|/2.42588e-82/hypothetical protein CONPUDRAFT_158148 [Coniophora puteana RWD-64-598 SS2]
GME1060_g	BU/EG/EL	0.71	2.34	1.84	0	ko03050//Proteasome;ko05169//Epstein-Barr virus infection	-	GO:0046914//transition metal ion binding	GO:0006259//DNA metabolic process	gi|302692442|ref|XP_003035900.1|/6.94291e-95/hypothetical protein SCHCODRAFT_74390 [Schizophyllum commune H4-8]
GME4374_g	BU/EG/EL	0.71	0.33	0.67	0	-	-	-	-	gi|336368169|gb|EGN96512.1|/3.46555e-24/hypothetical protein SERLA73DRAFT_140124 [Serpula lacrymans var. lacrymans S7.3]
GME5919_g	BU/EG/EL	1.6	2.01	1.17	0	ko03010//Ribosome	GO:0030529//ribonucleoprotein complex	GO:0005198//structural molecule activity	GO:0010467//gene expression	gi|170091316|ref|XP_001876880.1|/4.28449e-72/predicted protein [Laccaria bicolor S238N-H82]
GME9062_g	BU/EG/EL	0.36	1.67	0.5	0	-	-	-	-	-
GME355_g	BU/EG/EL	0.53	3.18	0.33	0	-	-	-	-	gi|170100455|ref|XP_001881445.1|/2.75946e-26/predicted protein [Laccaria bicolor S238N-H82]
GME5220_g	BU/EG/EL	3.21	2.34	0.84	0	ko03008//Ribosome biogenesis in eukaryotes	-	GO:0003676//nucleic acid binding;GO:0016741	GO:0006399//tRNA metabolic process;GO:0042254//ribosome biogenesis;GO:0006730//one-carbon metabolic process	gi|170103426|ref|XP_001882928.1|/4.58225e-117/predicted protein [Laccaria bicolor S238N-H82]
GME246_g	BU/EG/EL	1.07	1.67	0.5	0	-	-	-	-	gi|170097147|ref|XP_001879793.1|/4.11446e-39/predicted protein [Laccaria bicolor S238N-H82]
GME4764_g	BU/EG/EL	0.53	2.17	3.35	0	-	-	-	-	gi|170115596|ref|XP_001888992.1|/1.16053e-45/predicted protein [Laccaria bicolor S238N-H82]
GME2772_g	BU/EG/EL	1.25	0.33	0.33	0	-	-	-	-	gi|336369074|gb|EGN97416.1|/2.42194e-55/hypothetical protein SERLA73DRAFT_75102 [Serpula lacrymans var. lacrymans S7.3]
GME4451_g	BU/EG/EL	0.36	0.5	0.33	0	-	-	-	-	-
GME7190_g	BU/EG/EL	1.96	5.52	0.84	0	-	-	-	-	-
GME8747_g	BU/EG/EL	1.25	3.01	0.33	0	ko00520//Amino sugar and nucleotide sugar metabolism;ko01110//Biosynthesis of secondary metabolites	-	-	-	gi|395328760|gb|EJF61150.1|/2.52002e-80/ferredoxin reductase-like protein [Dichomitus squalens LYAD-421 SS1]
GME1189_g	BU/EG/EL	0.89	1.67	0.33	0	-	-	-	-	-
GME1983_g	BU/EG/EL	0.53	0.5	0.33	0	-	-	-	-	gi|302688549|ref|XP_003033954.1|/1.40257e-38/hypothetical protein SCHCODRAFT_66837 [Schizophyllum commune H4-8]
GME4106_g	BU/EG/EL	1.25	3.01	5.36	0	-	-	-	-	gi|389739411|gb|EIM80604.1|/3.31162e-09/hypothetical protein STEHIDRAFT_142559 [Stereum hirsutum FP-91666 SS1]
GME358_g	BU/EG/EL	3.21	5.69	0.5	0	ko01100//Metabolic pathways;ko00500//Starch and sucrose metabolism	-	GO:0003824//catalytic activity	-	gi|299743033|ref|XP_001835499.2|/1.89511e-175/exo-beta-1,3-glucanase [Coprinopsis cinerea okayama7#130]
GME6908_g	BU/EG/EL	0.89	0.84	0.33	0	-	-	GO:0016859//cis-trans isomerase activity	GO:0044267//cellular protein metabolic process	gi|170095996|ref|XP_001879218.1|/9.86962e-74/predicted protein [Laccaria bicolor S238N-H82]
GME740_g	BU/EG/EL	1.25	1	0.33	0	-	-	-	-	gi|169847335|ref|XP_001830379.1|/2.82885e-57/hypothetical protein CC1G_02015 [Coprinopsis cinerea okayama7#130]
GME10574_g	BU/EG/EL	2.32	1.84	0.84	0	-	-	-	-	gi|299743190|ref|XP_001835599.2|/1.23033e-16/hypothetical protein CC1G_03381 [Coprinopsis cinerea okayama7#130]
GME4870_g	BU/EG/EL	0.36	0.84	0.33	0	-	-	-	-	gi|402225903|gb|EJU05963.1|/5.45572e-06/hypothetical protein DACRYDRAFT_73183 [Dacryopinax sp. DJM-731 SS1]
GME3901_g	BU/EG/EL	1.43	2.84	0.5	0	-	-	-	-	gi|116202859|ref|XP_001227241.1|/7.90625e-100/hypothetical protein CHGG_09314 [Chaetomium globosum CBS 148.51]
GME6000_g	BU/EG/EL	1.43	2.84	2.01	0	-	-	-	-	gi|170100601|ref|XP_001881518.1|/3.58107e-10/predicted protein [Laccaria bicolor S238N-H82]
GME7495_g	BU/EG/EL	5.7	3.35	0.67	0	ko00930//Caprolactam degradation;ko01120//Microbial metabolism in diverse environments;ko00982//Drug metabolism - cytochrome P450;ko01120//Microbial metabolism in diverse environments;ko00680//Methane metabolism	-	-	-	gi|336371787|gb|EGO00127.1|/0/hypothetical protein SERLA73DRAFT_107112 [Serpula lacrymans var. lacrymans S7.3]
GME5029_g	BU/EG/EL	13.19	3.68	0.5	0	-	-	-	-	-
GME6202_g	BU/EG/EL	0.36	2.51	1.67	0	ko05131//Shigellosis;ko04120//Ubiquitin mediated proteolysis;ko04340//Hedgehog signaling pathway;ko04310//Wnt signaling pathway;ko04114//Oocyte meiosis;ko04710//Circadian rhythm - mammal	-	-	-	gi|392560176|gb|EIW53359.1|/2.85276e-128/WD40 repeat-like protein [Trametes versicolor FP-101664 SS1]
GME1340_g	BU/EG/EL	5.35	3.85	0.67	0	-	-	-	-	gi|170108328|ref|XP_001885373.1|/9.24246e-53/predicted protein [Laccaria bicolor S238N-H82]
GME5345_g	BU/EG/EL	1.6	0.33	1	0	ko02020//Two-component system;ko01100//Metabolic pathways;ko00061//Fatty acid biosynthesis;ko01110//Biosynthesis of secondary metabolites;ko00640//Propanoate metabolism;ko00620//Pyruvate metabolism;ko00190//Oxidative phosphorylation;ko00564//Glycerophospholipid metabolism;ko00260//Glycine, serine and threonine metabolism;ko01120//Microbial metabolism in diverse environments	-	GO:0046872//metal ion binding;GO:0050662//coenzyme binding;GO:0003824//catalytic activity	GO:0008152//metabolic process	gi|170087456|ref|XP_001874951.1|/0/predicted protein [Laccaria bicolor S238N-H82]
GME3368_g	BU/EG/EL	0.36	0.33	0.5	0	ko04910//Insulin signaling pathway;ko04150//mTOR signaling pathway;ko03013//RNA transport	-	GO:0003723//RNA binding	-	gi|169864586|ref|XP_001838900.1|/3.91133e-112/eukaryotic translation initiation factor 4E-1A [Coprinopsis cinerea okayama7#130]
GME822_g	BU/EG/EL	0.36	0.33	2.18	0	-	-	-	-	gi|299751389|ref|XP_001830237.2|/4.11488e-68/hypothetical protein CC1G_12766 [Coprinopsis cinerea okayama7#130]
GME1602_g	BU/EG/EL	2.32	5.35	1.34	0	-	-	-	-	gi|392561888|gb|EIW55069.1|/2.37787e-110/hypothetical protein TRAVEDRAFT_66443 [Trametes versicolor FP-101664 SS1]
GME3903_g	BU/EG/EL	0.89	1.84	1	0	-	-	-	-	-
GME7648_g	BU/EG/EL	0.71	0.67	1.34	0	-	GO:0044424//intracellular part	GO:0016854//racemase and epimerase activity	GO:0019318//hexose metabolic process	gi|395330306|gb|EJF62690.1|/1.83718e-54/rhamnose mutarotase [Dichomitus squalens LYAD-421 SS1]
GME6631_g	BU/EG/EL	2.14	1.84	0.5	0	-	-	-	-	gi|169863269|ref|XP_001838256.1|/7.78243e-11/hypothetical protein CC1G_04700 [Coprinopsis cinerea okayama7#130]
GME261_g	BU/EG/EL	0.53	0.67	0.5	0	-	-	-	-	-
GME1658_g	BU/EG/EL	2.49	0.33	1.67	0	-	-	-	-	gi|170091534|ref|XP_001876989.1|/8.53526e-35/predicted protein [Laccaria bicolor S238N-H82]
GME4560_g	BU/EG/EL	3.56	0.67	0.33	0	ko03420//Nucleotide excision repair	-	GO:0005488//binding	-	gi|170097135|ref|XP_001879787.1|/0/RAD26-like SNF2 family DNA-dependent ATPase [Laccaria bicolor S238N-H82]
GME3151_g	BU/EG/EL	3.21	2.68	0.5	0	-	-	-	-	gi|392590442|gb|EIW79771.1|/3.05923e-11/hypothetical protein CONPUDRAFT_83072 [Coniophora puteana RWD-64-598 SS2]
GME8058_g	BU/EG/EL	1.25	1.67	1.17	0	ko01100//Metabolic pathways;ko00564//Glycerophospholipid metabolism;ko04070//Phosphatidylinositol signaling system;ko00562//Inositol phosphate metabolism	GO:0044464//cell part	GO:0016772//transferase activity, transferring phosphorus-containing groups	GO:0006644//phospholipid metabolic process	gi|392595693|gb|EIW85016.1|/9.19194e-62/phosphatidylinositol synthase [Coniophora puteana RWD-64-598 SS2]
GME6922_g	BU/EG/EL	5.88	2.34	0.5	0	-	-	-	-	gi|336365778|gb|EGN94127.1|/6.49945e-29/hypothetical protein SERLA73DRAFT_188716 [Serpula lacrymans var. lacrymans S7.3]
GME11744_g	BU/EG/EL	3.03	1.67	0.67	0	ko00564//Glycerophospholipid metabolism	-	-	-	gi|392597069|gb|EIW86391.1|/1.85124e-60/phospholipase carboxylesterase [Coniophora puteana RWD-64-598 SS2]
GME1844_g	BU/EG/EL	0.36	3.35	0.67	0	-	-	-	-	gi|302680050|ref|XP_003029707.1|/4.084e-15/hypothetical protein SCHCODRAFT_236522 [Schizophyllum commune H4-8]
[truncated: 6,295 more rows]
