# Supplementary material for: Gene Expression Profiling Reveals Large Regulatory Switches between Succeeding Stipe Stages in Volvariella volvacea
Source: PLoS One. 2014 May 27;9(5):e97789. doi: 10.1371/journal.pone.0097789 (PMC4035324; doi:10.1371/journal.pone.0097789)
Supplement: Table S10 — V. volvacea orthologs of C. cinerea stipe elongation genes. (XLSX) [file pone.0097789.s012.xlsx]

## Sheet: Table S10
Table S10. V. volvacea orthologs of C. cinerea stipe elongation genes
Coprinopsis cinerea (mutant) gene	Protein name	Volvariella volvacea Gene ID	DGE (TPM)		Log2 Ratio (EL/EG)	P-value	FDR		Q-PCR (relative expression)a
			EG	EL					EG	EL
Cc.Cdc3	Cdc3 family encoding a septin protein	GME11273_g	409.3	627.71	0.61694	0	0		1.00±0.12	7.56±1.15
eln2	Cytochrome P450	GME3132_g	1	0.01	-6.64386	0.0156802	0.0320233		1.00±0.09	2.54±0.41
eln3	Glycosyltransferase	GME5148_g	2.01	4.35	1.11382	0.0235102	0.0456962		1.00±0.13	7.61±1.27
a Relative expression normalized against GAPDH, expression level in EG stage was set to 1.00 as reference sample Values marked in bold indicate that the genes up-regulated from EG to EL were confirmed by Q-PCR
